# Supplementary material for: DDX5 promotes oncogene C3 and FABP1 expressions and drives intestinal inflammation and tumorigenesis
Source: Life Sci Alliance. 2020 Aug 18;3(10):e202000772. doi: 10.26508/lsa.202000772 (PMC7441524; doi:10.26508/lsa.202000772)
Supplement: Supplementary file 3 [file LSA-2020-00772_SdataF1.2.xlsx]

## Sheet: colon_results_unfiltered_multif
	baseMean	log2FoldChange	lfcSE	stat	pvalue	padj	WT_1739_Colon_normalized	WT_1743_Colon_normalized	KO_1740_Colon_normalized	KO_1741_Colon_normalized	WT_1739_Colon_original	WT_1743_Colon_original	KO_1740_Colon_original	KO_1741_Colon_original	genename	genetype	chrom	length
ENSMUSG00000026621.13	1.47069	2.54945	3.61655	0.704941	0.480847	NA	0	0.900005	2.22277	2.75996	0	1	2	3	2018-03-01	protein_coding	chr1	2246
ENSMUSG00000036469.16	4.10905	-1.30283	2.12214	-0.613921	0.539268	NA	7.47066	3.60002	4.44554	0.919988	7	4	4	1	2018-03-01	protein_coding	chr8	7146
ENSMUSG00000079557.10	743.988	0.111008	0.208655	0.532015	0.594716	0.999934	722.52	708.304	761.299	783.83	677	787	685	852	2018-03-02	protein_coding	chr17	5997
ENSMUSG00000073481.9	1633.05	0.0145747	0.176155	0.0827378	0.93406	0.999934	1712.92	1523.71	1876.02	1419.54	1605	1693	1688	1543	2018-03-02	protein_coding	chr1	6629
ENSMUSG00000032656.14	208.813	0.102752	0.329961	0.311407	0.755491	0.999934	227.322	174.601	251.173	182.158	213	194	226	198	2018-03-03	protein_coding	chr18	6006
ENSMUSG00000039372.5	2.89931	-0.770987	2.43724	-0.316336	0.751748	NA	2.13447	5.40003	2.22277	1.83998	2	6	2	2	2018-03-04	protein_coding	chr1	4553
ENSMUSG00000023307.13	761.242	-0.225471	0.208498	-1.08141	0.279516	0.999934	835.647	805.505	677.945	725.87	783	895	610	789	2018-03-05	protein_coding	chr19	2396
ENSMUSG00000039100.10	2779.67	0.0110728	0.161035	0.06876	0.945181	0.999934	2742.8	2787.32	2572.86	3015.72	2570	3097	2315	3278	2018-03-06	protein_coding	chr15	9174
ENSMUSG00000026977.17	2686.53	0.0794233	0.179768	0.441811	0.658626	0.999934	2993.6	2256.31	2629.54	2866.68	2805	2507	2366	3116	2018-03-07	protein_coding	chr2	10391
ENSMUSG00000025702.15	2083.05	0.0708848	0.165423	0.428507	0.668282	0.999934	2020.28	2042.11	2207.21	2062.61	1893	2269	1986	2242	2018-03-08	protein_coding	chr6	9634
ENSMUSG00000040502.5	67.0917	-0.651626	0.548247	-1.18856	0.234612	0.999934	86.4462	77.4004	56.6807	47.8394	81	86	51	52	2018-03-09	protein_coding	chr10	3037
ENSMUSG00000078627.9	0.266809	-1.24165	4.96683	-0.249988	0.802597	NA	1.06724	0	0	0	1	0	0	0	2018-03-10	protein_coding	chr11	4249
ENSMUSG00000022269.13	0.225001	-1.24388	4.96736	-0.250411	0.802269	NA	0	0.900005	0	0	0	1	0	0	2018-03-11	protein_coding	chr15	2848
ENSMUSG00000000486.13	23.1511	-0.890797	0.972103	-0.91636	0.359478	NA	41.6223	18.9001	10.0025	22.0797	39	21	9	24	2018-09-01	protein_coding	chr7	2763
ENSMUSG00000026276.20	136.915	-0.345246	0.403598	-0.855421	0.392318	0.999934	156.884	148.501	103.359	138.918	147	165	93	151	2018-09-02	protein_coding	chr1	7979
ENSMUSG00000022456.16	2.03507	1.18559	3.18047	0.372774	0.709317	NA	4.26895	0	1.11139	2.75996	4	0	1	3	2018-09-03	protein_coding	chr15	6620
ENSMUSG00000020486.18	1.80008	-0.996207	3.07807	-0.323647	0.746205	NA	4.26895	0.900005	1.11139	0.919988	4	1	1	1	2018-09-04	protein_coding	chr11	3563
ENSMUSG00000072214.7	207.908	-0.0830461	0.331238	-0.250714	0.802035	0.999934	220.918	207.001	196.715	206.997	207	230	177	225	2018-09-05	protein_coding	chr16	3915
ENSMUSG00000050379.15	88.6473	-0.527467	0.482499	-1.0932	0.274306	0.999934	106.724	102.601	68.9059	76.359	100	114	62	83	2018-09-06	protein_coding	chrX	9882
ENSMUSG00000001833.17	2080.8	0.0832367	0.164826	0.504999	0.61356	0.999934	1990.4	2051.11	2163.87	2117.81	1865	2279	1947	2302	2018-09-07	protein_coding	chr9	11631
ENSMUSG00000018398.18	779.814	-0.163458	0.206137	-0.792959	0.427802	0.999934	799.361	848.705	737.96	733.23	749	943	664	797	2018-09-08	protein_coding	chr11	6087
ENSMUSG00000059248.13	1079.96	-0.0204561	0.188317	-0.108626	0.913499	0.999934	1135.54	1039.51	1123.61	1021.19	1064	1155	1011	1110	2018-09-09	protein_coding	chr11	7565
ENSMUSG00000019917.10	322.595	-0.147972	0.277515	-0.533202	0.593894	0.999934	371.399	307.802	322.302	288.876	348	342	290	314	2018-09-10	protein_coding	chr10	3110
ENSMUSG00000058013.11	681.038	-0.112753	0.216489	-0.520823	0.60249	0.999934	684.099	730.804	679.057	630.192	641	812	611	685	2018-09-11	protein_coding	chr5	9472
ENSMUSG00000022542.7	0.496806	0.0450723	4.9968	0.00902022	0.992803	NA	1.06724	0	0	0.919988	1	0	0	1	2018-09-12	protein_coding	chr16	2711
ENSMUSG00000109644.1	236.066	-0.0373532	0.314134	-0.118909	0.905348	0.999934	254.002	223.201	260.064	206.997	238	248	234	225	0610005C13Rik	antisense	chr7	3583
ENSMUSG00000007777.9	232.502	0.106461	0.321163	0.331487	0.740277	0.999934	199.573	249.301	245.616	235.517	187	277	221	256	0610009B22Rik	protein_coding	chr11	998
ENSMUSG00000086714.1	12.5126	0.233539	1.21613	0.192035	0.847715	NA	9.60514	13.5001	12.2252	14.7198	9	15	11	16	0610009E02Rik	processed_transcript	chr2	1803
ENSMUSG00000043644.4	42.409	0.0666959	0.680436	0.0980194	0.921917	0.999934	46.9584	35.1002	54.4579	33.1196	44	39	49	36	0610009L18Rik	bidirectional_promoter_lncRNA	chr11	619
ENSMUSG00000042208.15	500.517	-0.0952573	0.238196	-0.399911	0.689222	0.999934	506.938	526.503	506.792	461.834	475	585	456	502	0610010F05Rik	protein_coding	chr11	5226
ENSMUSG00000020831.18	14.7133	0.403344	1.12798	0.357581	0.720657	NA	11.7396	13.5001	18.8936	14.7198	11	15	17	16	0610010K14Rik	protein_coding	chr11	1896
ENSMUSG00000107002.1	562.869	-0.0647203	0.235645	-0.274652	0.783584	0.999934	564.569	582.303	617.931	486.674	529	647	556	529	0610012G03Rik	protein_coding	chr16	1445
ENSMUSG00000046683.16	0.73784	3.00884	4.86114	0.618957	0.535944	NA	0	0	1.11139	1.83998	0	0	1	2	0610025J13Rik	antisense	chr4	1121
ENSMUSG00000058706.5	522.888	0.120622	0.23288	0.517956	0.604489	0.999934	480.257	522.003	529.02	560.273	450	580	476	609	0610030E20Rik	protein_coding	chr6	5832
ENSMUSG00000099146.7	6.79231	-0.218266	1.6372	-0.133316	0.893943	NA	10.6724	4.50003	5.55693	6.43992	10	5	5	7	0610031O16Rik	antisense	chr3	2482
ENSMUSG00000028608.15	293.122	-0.20789	0.290766	-0.714972	0.474626	0.999934	313.768	313.202	298.963	246.557	294	348	269	268	0610037L13Rik	protein_coding	chr4	5633
ENSMUSG00000097882.2	0.502848	0.045031	4.99583	0.00901372	0.992808	NA	0	0.900005	1.11139	0	0	1	1	0	0610038B21Rik	antisense	chr8	3071
ENSMUSG00000058812.2	2.59964	0.599566	2.618	0.229017	0.818855	NA	1.06724	2.70002	1.11139	5.51993	1	3	1	6	0610039K10Rik	antisense	chr2	952
ENSMUSG00000089889.2	18.1717	0.098847	1.03484	0.0955195	0.923902	NA	19.2103	15.3001	13.3366	24.8397	18	17	12	27	0610040B10Rik	antisense	chr5	2098
ENSMUSG00000087341.4	15.2513	-0.218752	1.11823	-0.195623	0.844905	NA	13.8741	18.0001	8.89109	20.2397	13	20	8	22	0610040F04Rik	antisense	chr6	2150
ENSMUSG00000060512.7	1273.44	-0.146197	0.183323	-0.797483	0.425171	0.999934	1331.91	1341.91	1134.72	1285.22	1248	1491	1021	1397	0610040J01Rik	protein_coding	chr5	2403
ENSMUSG00000087361.7	6.69162	-0.591144	1.66874	-0.354245	0.723155	NA	10.6724	5.40003	3.33416	7.3599	10	6	3	8	0610043K17Rik	lincRNA	chr4	770
ENSMUSG00000114511.1	1.19284	2.04081	3.95034	0.516616	0.605424	NA	0	0.900005	1.11139	2.75996	0	1	1	3	0710001A04Rik	antisense	chr18	1345
ENSMUSG00000097863.1	0.726803	0.594751	4.88436	0.121766	0.903084	NA	1.06724	0	0	1.83998	1	0	0	2	1010001B22Rik	lincRNA	chr5	589
ENSMUSG00000097222.2	86.9057	0.0635473	0.487884	0.130251	0.896368	0.999934	94.9841	75.6004	87.7995	89.2388	89	84	79	97	1010001N08Rik	processed_transcript	chr18	3035
ENSMUSG00000097134.2	4.53828	-0.316668	1.96159	-0.161434	0.871751	NA	5.33619	4.50003	5.55693	2.75996	5	5	5	3	1110002J07Rik	lincRNA	chr10	2513
ENSMUSG00000071456.6	78.4648	0.487491	0.509931	0.955993	0.339076	0.999934	72.5721	58.5003	94.4678	88.3188	68	65	85	96	1110002L01Rik	antisense	chr12	4131
ENSMUSG00000106291.1	8.5618	0.3721	1.46142	0.254615	0.79902	NA	5.33619	9.90006	8.89109	10.1199	5	11	8	11	1110003F10Rik	TEC	chr5	767
ENSMUSG00000030663.12	728.742	-0.0350996	0.209684	-0.167393	0.867061	0.999934	735.326	739.804	726.846	712.991	689	822	654	775	1110004F10Rik	protein_coding	chr7	2490
ENSMUSG00000107121.1	5.68222	0.345345	1.7815	0.193851	0.846293	NA	6.40342	3.60002	4.44554	8.27989	6	4	4	9	1110006O24Rik	lincRNA	chr5	768
ENSMUSG00000021023.14	319.057	-0.0985729	0.282819	-0.348537	0.727437	0.999934	360.726	300.602	301.186	313.716	338	334	271	341	1110008L16Rik	protein_coding	chr12	4452
ENSMUSG00000039195.4	126.676	-0.213437	0.409322	-0.52144	0.602061	0.999934	122.732	149.401	106.693	127.878	115	166	96	139	1110008P14Rik	protein_coding	chr2	2694
ENSMUSG00000045237.5	212.033	-0.0199728	0.328734	-0.0607568	0.951553	0.999934	213.447	213.301	197.827	223.557	200	237	178	243	1110012L19Rik	protein_coding	chrX	1094
ENSMUSG00000116164.1	8.38835	-0.320169	1.46882	-0.217978	0.827447	NA	9.60514	9.00005	6.66831	8.27989	9	10	6	9	1110013H19Rik	lincRNA	chr15	671
ENSMUSG00000028441.12	0.459994	1.89962	4.93227	0.385141	0.700133	NA	0	0	0	1.83998	0	0	0	2	1110017D15Rik	protein_coding	chr4	1421
ENSMUSG00000085151.7	0.732845	1.31069	4.86178	0.26959	0.787476	NA	0	0.900005	1.11139	0.919988	0	1	1	1	1110018N20Rik	processed_transcript	chr2	1579
ENSMUSG00000097616.7	98.0337	0.529742	0.46054	1.15026	0.250035	0.999934	82.1773	78.3004	111.139	120.518	77	87	100	131	1110019D14Rik	lincRNA	chr6	1734
ENSMUSG00000097047.1	23.861	0.136742	0.899814	0.151967	0.879213	NA	23.4792	21.6001	20.0049	30.3596	22	24	18	33	1110020A21Rik	lincRNA	chr17	853
ENSMUSG00000103520.1	13.5055	0.204982	1.17478	0.174485	0.861484	NA	16.0086	9.00005	18.8936	10.1199	15	10	17	11	1110025M09Rik	TEC	chr15	855
ENSMUSG00000085972.1	44.8645	-0.0461767	0.661589	-0.0697967	0.944356	0.999934	48.0257	43.2002	42.2327	45.9994	45	48	38	50	1110028F11Rik	sense_intronic	chr11	976
ENSMUSG00000099139.1	0.833539	2.23951	4.91947	0.455233	0.648942	NA	0	0	3.33416	0	0	0	3	0	1110028F18Rik	lincRNA	chr8	1341
ENSMUSG00000037971.10	321.092	0.0399027	0.277772	0.143653	0.885775	0.999934	334.045	299.702	332.304	318.316	313	333	299	346	1110032A03Rik	protein_coding	chr9	5293
ENSMUSG00000046999.2	2.51319	0.718436	2.61287	0.27496	0.783347	NA	1.06724	2.70002	4.44554	1.83998	1	3	4	2	1110032F04Rik	protein_coding	chr3	2578
ENSMUSG00000099098.4	10.8946	0.593162	1.31241	0.451965	0.651294	NA	5.33619	12.6001	10.0025	15.6398	5	14	9	17	1110035H17Rik	antisense	chr7	1241
ENSMUSG00000097036.1	0.994658	-1.8061	4.27846	-0.422137	0.672925	NA	1.06724	1.80001	1.11139	0	1	2	1	0	1110036E04Rik	lincRNA	chr9	777
ENSMUSG00000092203.7	946.365	-0.168049	0.19848	-0.846677	0.397175	0.999934	1076.84	928.805	884.663	895.148	1009	1032	796	973	1110038B12Rik	processed_transcript	chr17	1811
ENSMUSG00000063236.6	222.636	0.282939	0.321981	0.878745	0.37954	0.999934	219.851	182.701	253.396	234.597	206	203	228	255	1110038F14Rik	protein_coding	chr15	1916
ENSMUSG00000085457.3	10.9949	1.56858	1.31996	1.18836	0.234691	NA	6.40342	4.50003	21.1163	11.9598	6	5	19	13	1110046J04Rik	antisense	chr13	3487
ENSMUSG00000040591.18	56.5947	0.174763	0.597241	0.292617	0.769815	0.999934	55.4963	49.5003	74.4628	46.9194	52	55	67	51	1110051M20Rik	protein_coding	chr2	5202
ENSMUSG00000035171.9	1001.99	-0.0402689	0.198201	-0.203172	0.839001	0.999934	959.446	1062.91	840.208	1145.38	899	1181	756	1245	1110059E24Rik	protein_coding	chr19	3067
ENSMUSG00000032551.7	198.532	0.100167	0.337441	0.296843	0.766586	0.999934	187.834	195.301	212.275	198.717	176	217	191	216	1110059G10Rik	protein_coding	chr9	5594
ENSMUSG00000105036.1	0.266809	-1.24165	4.96683	-0.249988	0.802597	NA	1.06724	0	0	0	1	0	0	0	1110060G06Rik	TEC	chr5	499
ENSMUSG00000078570.10	165.098	-0.0310506	0.373333	-0.0831715	0.933715	0.999934	149.413	184.501	175.599	150.878	140	205	158	164	1110065P20Rik	protein_coding	chr4	2069
ENSMUSG00000111857.1	6.68292	0.142467	1.63112	0.0873426	0.930399	NA	6.40342	6.30004	6.66831	7.3599	6	7	6	8	1190001M18Rik	lincRNA	chr11	1270
ENSMUSG00000045414.7	511.559	-0.0626882	0.237744	-0.263679	0.792027	0.999934	544.291	501.303	479.007	521.633	510	557	431	567	1190002N15Rik	protein_coding	chr9	3950
ENSMUSG00000043687.15	3.11069	0.862508	2.37326	0.363427	0.716286	NA	2.13447	1.80001	6.66831	1.83998	2	2	6	2	1190005I06Rik	protein_coding	chr8	1083
ENSMUSG00000063320.11	103.002	0.367265	0.450189	0.815802	0.414613	0.999934	90.7152	89.1005	108.916	123.278	85	99	98	134	1190007I07Rik	protein_coding	chr10	1197
ENSMUSG00000087684.1	0.225001	-1.24388	4.96736	-0.250411	0.802269	NA	0	0.900005	0	0	0	1	0	0	1200007C13Rik	lincRNA	chr2	2455
ENSMUSG00000097290.9	199.57	-0.11829	0.338964	-0.348974	0.727109	0.999934	204.91	209.701	171.153	212.517	192	233	154	231	1300002E11Rik	lincRNA	chr16	4213
ENSMUSG00000112545.1	48.7881	0.279058	0.636532	0.438405	0.661093	0.999934	40.555	47.7003	54.4579	52.4393	38	53	49	57	1300014J16Rik	lincRNA	chr12	1337
ENSMUSG00000033688.10	3.06784	1.69079	2.41347	0.700562	0.483576	NA	2.13447	0.900005	5.55693	3.67995	2	1	5	4	1300017J02Rik	protein_coding	chr9	4508
ENSMUSG00000096221.3	0.726803	0.594751	4.88436	0.121766	0.903084	NA	1.06724	0	0	1.83998	1	0	0	2	1500002C15Rik	antisense	chr4	2183
ENSMUSG00000097595.2	7.24465	0.368228	1.58059	0.232969	0.815786	NA	5.33619	7.20004	10.0025	6.43992	5	8	9	7	1500002F19Rik	processed_transcript	chr7	1239
ENSMUSG00000098912.7	2.45431	0.0447387	2.59458	0.0172431	0.986243	NA	2.13447	2.70002	2.22277	2.75996	2	3	2	3	1500004A13Rik	processed_transcript	chr3	13854
ENSMUSG00000104888.1	22.6466	1.21251	0.936275	1.29504	0.195307	NA	11.7396	15.3001	37.7871	25.7597	11	17	34	28	1500005C15Rik	TEC	chr3	2394
ENSMUSG00000068099.4	0.544656	0.0456629	4.88765	0.00934252	0.992546	NA	1.06724	0	1.11139	0	1	0	1	0	1500009C09Rik	protein_coding	chr15	1904
ENSMUSG00000087651.3	106.676	0.170854	0.447412	0.381871	0.702557	0.999934	91.7824	108.901	121.141	104.879	86	121	109	114	1500009L16Rik	protein_coding	chr10	3465
ENSMUSG00000072694.7	49.6788	0.172749	0.63473	0.272162	0.785498	0.999934	52.2946	41.4002	48.901	56.1193	49	46	44	61	1500011B03Rik	protein_coding	chr5	1746
ENSMUSG00000051319.6	144.454	0.200669	0.399842	0.501871	0.615759	0.999934	152.615	117.001	138.923	169.278	143	130	125	184	1500011K16Rik	protein_coding	chr2	800
ENSMUSG00000098702.1	64.4617	-0.435247	0.558759	-0.778953	0.436008	0.999934	88.5807	60.3003	61.1262	47.8394	83	67	55	52	1500015A07Rik	antisense	chr18	2296
ENSMUSG00000094732.1	0.229997	1.33177	4.96683	0.268132	0.788597	NA	0	0	0	0.919988	0	0	0	1	1500015L24Rik	lincRNA	chr19	780
ENSMUSG00000097383.1	11.5555	-0.603999	1.26941	-0.47581	0.63421	NA	11.7396	16.2001	10.0025	8.27989	11	18	9	9	1500026H17Rik	bidirectional_promoter_lncRNA	chr10	3027
ENSMUSG00000059631.6	1.40181	-1.423	3.67023	-0.387713	0.698228	NA	1.06724	2.70002	0	1.83998	1	3	0	2	1500035N22Rik	lincRNA	chr5	865
ENSMUSG00000043747.12	3.44896	-0.328814	2.22276	-0.147931	0.882398	NA	3.20171	4.50003	3.33416	2.75996	3	5	3	3	1520401A03Rik	protein_coding	chr17	4111
ENSMUSG00000035595.6	98.2537	-0.215767	0.471908	-0.457223	0.647511	0.999934	110.993	99.0006	74.4628	108.559	104	110	67	118	1600002K03Rik	protein_coding	chr10	678
ENSMUSG00000050088.9	745.282	0.237633	0.215502	1.1027	0.270159	0.999934	679.83	683.104	902.445	715.751	637	759	812	778	1600012H06Rik	protein_coding	chr17	3294
ENSMUSG00000054676.15	137.969	-0.0917087	0.394811	-0.232285	0.816317	0.999934	143.01	141.301	143.369	124.198	134	157	129	135	1600014C10Rik	protein_coding	chr7	3949
ENSMUSG00000094690.2	0.544656	0.0456629	4.88765	0.00934252	0.992546	NA	1.06724	0	1.11139	0	1	0	1	0	1600014C23Rik	protein_coding	chr17	518
ENSMUSG00000029813.8	0.225001	-1.24388	4.96736	-0.250411	0.802269	NA	0	0.900005	0	0	0	1	0	0	1600015I10Rik	protein_coding	chr6	2485
ENSMUSG00000102505.1	0.229997	1.33177	4.96683	0.268132	0.788597	NA	0	0	0	0.919988	0	0	0	1	1600017P15Rik	TEC	chr3	890
ENSMUSG00000097048.7	195.601	-0.330939	0.34327	-0.964078	0.335007	0.999934	213.447	221.401	191.158	156.398	200	246	172	170	1600020E01Rik	antisense	chr6	4328
ENSMUSG00000104986.1	4.83998	0.963625	1.9267	0.500142	0.616975	NA	2.13447	4.50003	4.44554	8.27989	2	5	4	9	1600023N17Rik	TEC	chr5	1007
ENSMUSG00000047150.8	1.46569	1.81102	3.60763	0.501997	0.61567	NA	0	1.80001	2.22277	1.83998	0	2	2	2	1700001C19Rik	protein_coding	chr17	1896
ENSMUSG00000099419.1	0.266809	-1.24165	4.96683	-0.249988	0.802597	NA	1.06724	0	0	0	1	0	0	0	1700001D01Rik	antisense	chr8	565
ENSMUSG00000085984.7	1.53827	1.21815	3.58319	0.339964	0.733884	NA	3.20171	0	1.11139	1.83998	3	0	1	2	1700001G11Rik	processed_transcript	chr14	1080
ENSMUSG00000103746.1	2.59569	1.23156	2.86939	0.429207	0.667773	NA	0	5.40003	2.22277	2.75996	0	6	2	3	1700001G17Rik	TEC	chr1	889
ENSMUSG00000095040.2	4.62497	1.79157	2.01119	0.890801	0.373036	NA	2.13447	1.80001	4.44554	10.1199	2	2	4	11	1700001J03Rik	protein_coding	chr5	868
ENSMUSG00000075511.9	266.9	0.771619	0.300123	2.57101	0.0101404	0.380925	215.582	177.301	386.762	287.956	202	197	348	313	1700001L05Rik	lincRNA	chr15	6112
ENSMUSG00000021534.8	5.16938	-0.195781	1.85474	-0.105557	0.915934	NA	6.40342	4.50003	3.33416	6.43992	6	5	3	7	1700001L19Rik	protein_coding	chr13	1826
ENSMUSG00000044320.14	42.911	-0.292094	0.675202	-0.432603	0.665303	0.999934	50.1602	44.1002	43.344	34.0396	47	49	39	37	1700001O22Rik	protein_coding	chr2	2788
ENSMUSG00000018543.8	3.53258	-0.328546	2.20186	-0.149213	0.881385	NA	5.33619	2.70002	3.33416	2.75996	5	3	3	3	1700001P01Rik	protein_coding	chr11	624
ENSMUSG00000085944.1	4.4168	0.381555	1.98274	0.192438	0.847399	NA	3.20171	4.50003	4.44554	5.51993	3	5	4	6	1700003D09Rik	processed_transcript	chr11	1389
ENSMUSG00000030030.5	1.22466	-0.465463	3.57858	-0.130069	0.896512	NA	1.06724	1.80001	1.11139	0.919988	1	2	1	1	1700003E16Rik	protein_coding	chr6	2221
ENSMUSG00000038523.10	0.450003	-1.81261	4.93254	-0.367481	0.71326	NA	0	1.80001	0	0	0	2	0	0	1700003F12Rik	protein_coding	chr2	976
ENSMUSG00000100372.1	4.27542	0.653856	2.03908	0.320663	0.748466	NA	5.33619	1.80001	4.44554	5.51993	5	2	4	6	1700003I22Rik	lincRNA	chr1	482
ENSMUSG00000085389.7	0.229997	1.33177	4.96683	0.268132	0.788597	NA	0	0	0	0.919988	0	0	0	1	1700003M07Rik	lincRNA	chr4	873
ENSMUSG00000102463.1	1.80612	-1.94283	3.30092	-0.588571	0.556149	NA	3.20171	1.80001	2.22277	0	3	2	2	0	1700003N22Rik	processed_pseudogene	chr3	808
ENSMUSG00000034764.15	8.72274	-0.723941	1.45762	-0.496661	0.619428	NA	13.8741	8.10005	5.55693	7.3599	13	9	5	8	1700006J14Rik	antisense	chr10	2885
ENSMUSG00000101234.1	0.266809	-1.24165	4.96683	-0.249988	0.802597	NA	1.06724	0	0	0	1	0	0	0	1700007E05Rik	transcribed_processed_pseudogene	chr16	2628
ENSMUSG00000100666.1	0.459994	1.89962	4.93227	0.385141	0.700133	NA	0	0	0	1.83998	0	0	0	2	1700007F19Rik	lincRNA	chr3	1642
ENSMUSG00000086330.7	0.277846	1.334	4.96736	0.268553	0.788274	NA	0	0	1.11139	0	0	0	1	0	1700007J10Rik	processed_transcript	chr11	1298
ENSMUSG00000026831.16	1.6318	-1.10873	3.44625	-0.321722	0.747663	NA	1.06724	2.70002	0	2.75996	1	3	0	3	1700007K13Rik	protein_coding	chr2	965
ENSMUSG00000097318.2	30.8629	0.435083	0.804389	0.540887	0.588586	0.999934	27.7482	22.5001	51.1237	22.0797	26	25	46	24	1700007L15Rik	bidirectional_promoter_lncRNA	chr16	738
ENSMUSG00000104872.1	0.689991	2.23599	4.9193	0.454534	0.649445	NA	0	0	0	2.75996	0	0	0	3	1700008B11Rik	antisense	chr5	634
ENSMUSG00000111986.1	0.266809	-1.24165	4.96683	-0.249988	0.802597	NA	1.06724	0	0	0	1	0	0	0	1700008C04Rik	lincRNA	chr12	797
ENSMUSG00000101225.1	26.7526	0.209194	0.84778	0.246755	0.805098	0.999934	20.2775	29.7002	26.6733	30.3596	19	33	24	33	1700008J07Rik	antisense	chr7	2432
ENSMUSG00000008028.15	0.988617	-1.80108	4.28776	-0.420052	0.674448	NA	2.13447	0.900005	0	0.919988	2	1	0	1	1700008O03Rik	protein_coding	chr7	3675
ENSMUSG00000057047.5	1.46069	1.23886	3.65686	0.338778	0.734777	NA	0	2.70002	2.22277	0.919988	0	3	2	1	1700010B08Rik	protein_coding	chr2	899
ENSMUSG00000115752.1	0.496806	0.0450723	4.9968	0.00902022	0.992803	NA	1.06724	0	0	0.919988	1	0	0	1	1700010G06Rik	antisense	chr15	683
ENSMUSG00000023873.13	64.8643	-0.568749	0.556469	-1.02207	0.306749	0.999934	75.7738	79.2004	51.1237	53.3593	71	88	46	58	1700010I14Rik	protein_coding	chr17	2292
ENSMUSG00000085102.1	0.721808	-1.21757	4.86122	-0.250466	0.802227	NA	1.06724	0.900005	0	0.919988	1	1	0	1	1700010K24Rik	antisense	chr3	226
ENSMUSG00000108791.1	0.277846	1.334	4.96736	0.268553	0.788274	NA	0	0	1.11139	0	0	0	1	0	1700011D18Rik	lincRNA	chr7	277
ENSMUSG00000031682.5	1.25543	-2.15379	3.90664	-0.551316	0.581417	NA	3.20171	0.900005	0	0.919988	3	1	0	1	1700011L22Rik	protein_coding	chr8	1026
ENSMUSG00000085470.1	0.277846	1.334	4.96736	0.268553	0.788274	NA	0	0	1.11139	0	0	0	1	0	1700012C14Rik	lincRNA	chr6	622
ENSMUSG00000110424.1	31.0271	0.368083	0.795315	0.462814	0.643498	0.999934	30.9499	23.4001	31.1188	38.6395	29	26	28	42	1700012D14Rik	processed_transcript	chr7	4153
ENSMUSG00000105023.1	0.229997	1.33177	4.96683	0.268132	0.788597	NA	0	0	0	0.919988	0	0	0	1	1700012D16Rik	sense_intronic	chr3	577
ENSMUSG00000027886.7	0.909997	0.0441603	4.80873	0.00918336	0.992673	NA	0	1.80001	0	1.83998	0	2	0	2	1700013F07Rik	protein_coding	chr3	1452
ENSMUSG00000041399.3	0.229997	1.33177	4.96683	0.268132	0.788597	NA	0	0	0	0.919988	0	0	0	1	1700013G24Rik	protein_coding	chr4	1048
ENSMUSG00000106586.1	0.266809	-1.24165	4.96683	-0.249988	0.802597	NA	1.06724	0	0	0	1	0	0	0	1700013M08Rik	antisense	chr5	1481
ENSMUSG00000051054.4	0.544656	0.0456629	4.88765	0.00934252	0.992546	NA	1.06724	0	1.11139	0	1	0	1	0	1700014D04Rik	protein_coding	chr13	3281
ENSMUSG00000079666.8	0.721808	-1.21757	4.86122	-0.250466	0.802227	NA	1.06724	0.900005	0	0.919988	1	1	0	1	1700015F17Rik	protein_coding	chr5	1118
ENSMUSG00000097671.2	1.07827	-0.794128	4.49119	-0.176819	0.859651	NA	3.20171	0	1.11139	0	3	0	1	0	1700015O11Rik	lincRNA	chr6	678
ENSMUSG00000102737.1	4.57792	-0.544469	1.96954	-0.276445	0.782206	NA	4.26895	6.30004	2.22277	5.51993	4	7	2	6	1700016A09Rik	TEC	chr8	835
ENSMUSG00000015962.5	1.77431	0.531667	3.02673	0.175657	0.860563	NA	2.13447	0.900005	2.22277	1.83998	2	1	2	2	1700016C15Rik	protein_coding	chr1	768
ENSMUSG00000031509.10	0.229997	1.33177	4.96683	0.268132	0.788597	NA	0	0	0	0.919988	0	0	0	1	1700016D06Rik	protein_coding	chr8	1612
ENSMUSG00000103481.1	0.229997	1.33177	4.96683	0.268132	0.788597	NA	0	0	0	0.919988	0	0	0	1	1700016D08Rik	TEC	chr16	368
ENSMUSG00000104955.1	0.266809	-1.24165	4.96683	-0.249988	0.802597	NA	1.06724	0	0	0	1	0	0	0	1700016F12Rik	lincRNA	chr5	655
ENSMUSG00000100625.7	5.51931	0.713829	1.8361	0.388775	0.697442	NA	6.40342	1.80001	11.1139	2.75996	6	2	10	3	1700016G22Rik	lincRNA	chr13	740
ENSMUSG00000029320.11	10.8451	0.677753	1.30625	0.518855	0.603862	NA	10.6724	6.30004	14.448	11.9598	10	7	13	13	1700016H13Rik	protein_coding	chr5	1751
ENSMUSG00000053783.5	19.9929	-0.169566	0.97711	-0.173538	0.862229	NA	28.8154	14.4001	21.1163	15.6398	27	16	19	17	1700016K19Rik	protein_coding	chr11	921
ENSMUSG00000101483.1	0.277846	1.334	4.96736	0.268553	0.788274	NA	0	0	1.11139	0	0	0	1	0	1700016L21Rik	antisense	chr1	968
ENSMUSG00000085609.1	0.225001	-1.24388	4.96736	-0.250411	0.802269	NA	0	0.900005	0	0	0	1	0	0	1700016P03Rik	processed_transcript	chr11	863
ENSMUSG00000032300.7	212.584	0.393869	0.332005	1.18633	0.235491	0.999934	166.489	201.601	246.728	235.517	156	224	222	256	1700017B05Rik	protein_coding	chr9	5235
ENSMUSG00000024729.7	0.450003	-1.81261	4.93254	-0.367481	0.71326	NA	0	1.80001	0	0	0	2	0	0	1700017D01Rik	protein_coding	chr19	3661
ENSMUSG00000038408.14	0.684995	0.570179	4.85336	0.117481	0.906479	NA	0	0.900005	0	1.83998	0	1	0	2	1700018A04Rik	lincRNA	chr13	4216
ENSMUSG00000103616.1	3.13221	-0.561928	2.67565	-0.210016	0.833655	NA	4.26895	0.900005	0	7.3599	4	1	0	8	1700018A14Rik	TEC	chr18	711
ENSMUSG00000107368.1	0.229997	1.33177	4.96683	0.268132	0.788597	NA	0	0	0	0.919988	0	0	0	1	1700018A23Rik	antisense	chr6	398
ENSMUSG00000100075.1	3.62112	-0.871566	2.19473	-0.397118	0.69128	NA	3.20171	6.30004	2.22277	2.75996	3	7	2	3	1700018L02Rik	antisense	chr19	2485
ENSMUSG00000046145.7	0.957846	0.848179	4.33423	0.195693	0.84485	NA	0	1.80001	1.11139	0.919988	0	2	1	1	1700018M17Rik	pseudogene	chr4	456
ENSMUSG00000060715.9	0.277846	1.334	4.96736	0.268553	0.788274	NA	0	0	1.11139	0	0	0	1	0	1700019A02Rik	protein_coding	chr1	777
ENSMUSG00000113770.1	0.544656	0.0456629	4.88765	0.00934252	0.992546	NA	1.06724	0	1.11139	0	1	0	1	0	1700019C18Rik	lincRNA	chr13	2633
ENSMUSG00000043629.12	332.282	-0.46481	0.287563	-1.61638	0.106013	0.999934	395.945	371.702	236.725	324.756	371	413	213	353	1700019D03Rik	protein_coding	chr1	4330
ENSMUSG00000086202.1	0.266809	-1.24165	4.96683	-0.249988	0.802597	NA	1.06724	0	0	0	1	0	0	0	1700019E08Rik	lincRNA	chr2	830
ENSMUSG00000111639.1	1.43862	-2.45932	3.64655	-0.674424	0.500042	NA	2.13447	2.70002	0	0.919988	2	3	0	1	1700019L13Rik	antisense	chr9	4947
ENSMUSG00000026931.10	0.555693	1.90274	4.93253	0.385753	0.69968	NA	0	0	2.22277	0	0	0	2	0	1700019N19Rik	protein_coding	chr19	1257
ENSMUSG00000100937.1	0.507843	2.4877	4.89227	0.508496	0.611106	NA	0	0	1.11139	0.919988	0	0	1	1	1700020D05Rik	protein_coding	chr19	1021
ENSMUSG00000110052.1	0.721808	-1.21757	4.86122	-0.250466	0.802227	NA	1.06724	0.900005	0	0.919988	1	1	0	1	1700020G03Rik	TEC	chr8	889
ENSMUSG00000085438.1	3183.32	0.146201	0.158823	0.92053	0.357296	0.999934	3085.38	2955.62	3164.12	3528.15	2891	3284	2847	3835	1700020I14Rik	lincRNA	chr2	8306
ENSMUSG00000035085.5	2.71612	-0.749011	2.48692	-0.30118	0.763277	NA	3.20171	3.60002	2.22277	1.83998	3	4	2	2	1700020L24Rik	protein_coding	chr11	1050
ENSMUSG00000050844.5	1.23569	1.47497	3.90689	0.377531	0.705779	NA	0	1.80001	2.22277	0.919988	0	2	2	1	1700020N01Rik	protein_coding	chr10	1136
ENSMUSG00000100253.1	1.59715	1.5033	3.48867	0.43091	0.666534	NA	2.13447	0	3.33416	0.919988	2	0	3	1	1700020N18Rik	lincRNA	chr1	547
ENSMUSG00000037535.5	0.229997	1.33177	4.96683	0.268132	0.788597	NA	0	0	0	0.919988	0	0	0	1	1700021A07Rik	lincRNA	chr10	721
ENSMUSG00000019797.11	457.12	0.34386	0.250878	1.37062	0.170492	0.999934	414.088	386.102	596.814	431.474	388	429	537	469	1700021F05Rik	protein_coding	chr10	4141
ENSMUSG00000086890.1	0.727849	-0.50547	4.88184	-0.103541	0.917534	NA	0	1.80001	1.11139	0	0	2	1	0	1700021J08Rik	antisense	chr4	575
ENSMUSG00000087343.1	0.533619	-1.8095	4.93228	-0.366869	0.713717	NA	2.13447	0	0	0	2	0	0	0	1700021N21Rik	antisense	chr4	904
ENSMUSG00000028451.12	0.721808	-1.21757	4.86122	-0.250466	0.802227	NA	1.06724	0.900005	0	0.919988	1	1	0	1	1700022I11Rik	protein_coding	chr4	4542
ENSMUSG00000097523.1	2.44826	-0.198632	2.63748	-0.0753114	0.939967	NA	3.20171	1.80001	1.11139	3.67995	3	2	1	4	1700022N22Rik	lincRNA	chr17	709
ENSMUSG00000020940.13	0.78569	3.01093	4.86092	0.619417	0.535642	NA	0	0	2.22277	0.919988	0	0	2	1	1700023F06Rik	protein_coding	chr11	1452
ENSMUSG00000089827.1	4.825	0.293745	1.93099	0.152121	0.879091	NA	2.13447	7.20004	4.44554	5.51993	2	8	4	6	1700023H06Rik	processed_transcript	chr13	1044
ENSMUSG00000032666.16	514.844	-0.00703178	0.247976	-0.0283567	0.977378	0.999934	527.215	494.103	626.822	411.235	494	549	564	447	1700025G04Rik	protein_coding	chr1	11788
ENSMUSG00000112482.1	0.229997	1.33177	4.96683	0.268132	0.788597	NA	0	0	0	0.919988	0	0	0	1	1700025K04Rik	lincRNA	chr10	1174
ENSMUSG00000100121.1	8.59264	0.767082	1.50691	0.509043	0.610722	NA	11.7396	2.70002	8.89109	11.0399	11	3	8	12	1700025N23Rik	antisense	chr6	915
ENSMUSG00000114681.1	1.27146	1.46288	3.86212	0.378778	0.704853	NA	2.13447	0	1.11139	1.83998	2	0	1	2	1700026N04Rik	bidirectional_promoter_lncRNA	chr13	643
ENSMUSG00000084864.1	0.266809	-1.24165	4.96683	-0.249988	0.802597	NA	1.06724	0	0	0	1	0	0	0	1700027A07Rik	antisense	chr15	458
ENSMUSG00000100911.2	0.544656	0.0456629	4.88765	0.00934252	0.992546	NA	1.06724	0	1.11139	0	1	0	1	0	1700027F09Rik	lincRNA	chr5	767
ENSMUSG00000111422.1	0.507843	2.4877	4.89227	0.508496	0.611106	NA	0	0	1.11139	0.919988	0	0	1	1	1700027J07Rik	lincRNA	chr10	2782
ENSMUSG00000097321.5	19.6598	0.343777	0.979806	0.350862	0.725692	NA	20.2775	14.4001	25.5619	18.3998	19	16	23	20	1700028E10Rik	processed_transcript	chr5	6927
ENSMUSG00000056821.13	1.48043	-2.52108	3.62036	-0.696362	0.486202	NA	3.20171	1.80001	0	0.919988	3	2	0	1	1700028I16Rik	lincRNA	chr10	1056
ENSMUSG00000038782.6	16.2134	-0.00124706	1.07318	-0.00116202	0.999073	NA	18.143	14.4001	16.6708	15.6398	17	16	15	17	1700028J19Rik	protein_coding	chr7	2177
ENSMUSG00000089798.9	4.82716	0.0952409	1.91908	0.0496285	0.960418	NA	4.26895	4.50003	7.7797	2.75996	4	5	7	3	1700028K03Rik	protein_coding	chr5	7963
ENSMUSG00000078635.3	7.84048	-0.958905	1.62956	-0.588442	0.556236	NA	7.47066	9.90006	1.11139	12.8798	7	11	1	14	1700028N14Rik	processed_transcript	chr11	747
ENSMUSG00000031452.15	1.0475	-0.748155	4.18243	-0.17888	0.858032	NA	1.06724	0.900005	2.22277	0	1	1	2	0	1700029H14Rik	protein_coding	chr8	1421
ENSMUSG00000044916.10	22.9431	-0.0381194	0.909521	-0.0419116	0.966569	NA	21.3447	25.2001	22.2277	22.9997	20	28	20	25	1700029I15Rik	protein_coding	chr2	1348
ENSMUSG00000071103.9	25.5906	0.0536332	0.863438	0.0621159	0.950471	NA	22.412	27.9002	24.4505	27.5996	21	31	22	30	1700029J07Rik	protein_coding	chr8	2740
ENSMUSG00000085333.1	0.277846	1.334	4.96736	0.268553	0.788274	NA	0	0	1.11139	0	0	0	1	0	1700030A11Rik	antisense	chr17	888
ENSMUSG00000099759.1	28.8846	0.39007	0.82193	0.474579	0.635087	0.999934	32.0171	18.9001	33.3416	31.2796	30	21	30	34	1700030C10Rik	processed_transcript	chr12	1735
ENSMUSG00000091071.2	11.5844	-0.0931145	1.26722	-0.0734793	0.941425	NA	8.5379	15.3001	7.7797	14.7198	8	17	7	16	1700030C10Rik	transcribed_unprocessed_pseudogene	chr12	1471
ENSMUSG00000086459.2	0.951805	-0.75395	4.34432	-0.173549	0.86222	NA	1.06724	0.900005	0	1.83998	1	1	0	2	1700030C12Rik	processed_transcript	chr11	1169
ENSMUSG00000103387.1	0.266809	-1.24165	4.96683	-0.249988	0.802597	NA	1.06724	0	0	0	1	0	0	0	1700030I03Rik	TEC	chr12	942
ENSMUSG00000031847.8	17.3544	-0.140455	1.05268	-0.133427	0.893856	NA	12.8068	24.3001	16.6708	15.6398	12	27	15	17	1700030J22Rik	protein_coding	chr8	2996
ENSMUSG00000052794.13	71.4399	0.343824	0.536144	0.64129	0.521334	0.999934	54.4291	72.0004	81.1312	78.199	51	80	73	85	1700030K09Rik	protein_coding	chr8	2970
ENSMUSG00000092239.1	1.0525	1.75331	4.17073	0.420385	0.674204	NA	1.06724	0	2.22277	0.919988	1	0	2	1	1700031A10Rik	antisense	chr17	656
ENSMUSG00000047046.8	0.811465	-0.480044	4.85336	-0.0989094	0.92121	NA	2.13447	0	1.11139	0	2	0	1	0	1700031F10Rik	antisense	chr6	639
ENSMUSG00000100315.6	5.67352	1.34794	1.79929	0.749155	0.453764	NA	2.13447	4.50003	7.7797	8.27989	2	5	7	9	1700031P21Rik	lincRNA	chr12	568
ENSMUSG00000055833.14	25.4108	0.393713	0.867491	0.453852	0.649935	NA	21.3447	22.5001	31.1188	26.6796	20	25	28	29	1700034H15Rik	antisense	chr1	6099
ENSMUSG00000074619.5	0.277846	1.334	4.96736	0.268553	0.788274	NA	0	0	1.11139	0	0	0	1	0	1700034I23Rik	protein_coding	chr3	2348
ENSMUSG00000097893.8	3.91	-0.0989474	2.12812	-0.0464953	0.962915	NA	2.13447	6.30004	4.44554	2.75996	2	7	4	3	1700034P13Rik	antisense	chr1	3101
ENSMUSG00000095956.2	0.277846	1.334	4.96736	0.268553	0.788274	NA	0	0	1.11139	0	0	0	1	0	1700036A12Rik	lincRNA	chr9	1828
ENSMUSG00000005983.15	44.7086	0.413068	0.682862	0.604907	0.545241	0.999934	32.0171	44.1002	62.2376	40.4795	30	49	56	44	1700037C18Rik	protein_coding	chr16	3227
ENSMUSG00000114125.1	1.44362	-1.71866	3.62756	-0.473779	0.635658	NA	2.13447	1.80001	0	1.83998	2	2	0	2	1700037F03Rik	antisense	chr13	365
ENSMUSG00000027327.16	206.621	0.102124	0.33275	0.30691	0.758912	0.999934	227.322	172.801	226.723	199.637	213	192	204	217	1700037H04Rik	protein_coding	chr2	2286
ENSMUSG00000102536.1	0.266809	-1.24165	4.96683	-0.249988	0.802597	NA	1.06724	0	0	0	1	0	0	0	1700039I01Rik	TEC	chr1	479
ENSMUSG00000097933.2	0.507843	2.4877	4.89227	0.508496	0.611106	NA	0	0	1.11139	0.919988	0	0	1	1	1700039M10Rik	bidirectional_promoter_lncRNA	chr14	532
ENSMUSG00000097515.2	1.05854	0.916224	4.57679	0.200189	0.841333	NA	0	0.900005	3.33416	0	0	1	3	0	1700040D17Rik	lincRNA	chr3	998
ENSMUSG00000113997.1	0.229997	1.33177	4.96683	0.268132	0.788597	NA	0	0	0	0.919988	0	0	0	1	1700040E09Rik	lincRNA	chr12	606
ENSMUSG00000107406.1	4.26431	-0.415602	2.05819	-0.201926	0.839975	NA	2.13447	8.10005	2.22277	4.59994	2	9	2	5	1700040L08Rik	antisense	chr6	541
ENSMUSG00000116260.1	1.88604	2.42338	3.29124	0.736313	0.461541	NA	1.06724	0	5.55693	0.919988	1	0	5	1	1700041B01Rik	antisense	chr15	503
ENSMUSG00000054822.5	2.18146	0.0915214	2.77208	0.0330155	0.973662	NA	2.13447	1.80001	1.11139	3.67995	2	2	1	4	1700041G16Rik	lincRNA	chr8	1824
ENSMUSG00000100857.2	0.833539	2.23951	4.91947	0.455233	0.648942	NA	0	0	3.33416	0	0	0	3	0	1700041M19Rik	lincRNA	chr16	2947
ENSMUSG00000105991.1	0.689991	2.23599	4.9193	0.454534	0.649445	NA	0	0	0	2.75996	0	0	0	3	1700042D02Rik	lincRNA	chr9	389
ENSMUSG00000078593.2	1.47069	2.54945	3.61655	0.704941	0.480847	NA	0	0.900005	2.22277	2.75996	0	1	2	3	1700042G07Rik	protein_coding	chr4	385
ENSMUSG00000087044.1	1.53827	1.21815	3.58319	0.339964	0.733884	NA	3.20171	0	1.11139	1.83998	3	0	1	2	1700042G15Rik	lincRNA	chr4	664
ENSMUSG00000086391.1	0.266809	-1.24165	4.96683	-0.249988	0.802597	NA	1.06724	0	0	0	1	0	0	0	1700042O10Rik	antisense	chr11	1075
ENSMUSG00000078492.3	0.732845	1.31069	4.86178	0.26959	0.787476	NA	0	0.900005	1.11139	0.919988	0	1	1	1	1700045H11Rik	antisense	chr4	593
ENSMUSG00000087347.1	1.7793	2.13956	3.34884	0.638896	0.52289	NA	2.13447	0	2.22277	2.75996	2	0	2	3	1700047K16Rik	processed_transcript	chr11	886
ENSMUSG00000043773.5	0.951805	-0.75395	4.34432	-0.173549	0.86222	NA	1.06724	0.900005	0	1.83998	1	1	0	2	1700048O20Rik	lincRNA	chr9	2099
ENSMUSG00000011052.6	0.225001	-1.24388	4.96736	-0.250411	0.802269	NA	0	0.900005	0	0	0	1	0	0	1700049J03Rik	antisense	chr17	421
ENSMUSG00000086951.1	0.229997	1.33177	4.96683	0.268132	0.788597	NA	0	0	0	0.919988	0	0	0	1	1700051A21Rik	processed_transcript	chr11	1800
ENSMUSG00000103341.1	0.491811	-2.39757	4.89228	-0.490072	0.624083	NA	1.06724	0.900005	0	0	1	1	0	0	1700051O22Rik	TEC	chr8	638
ENSMUSG00000099681.1	83.6899	-0.156477	0.498657	-0.313797	0.753675	0.999934	86.4462	89.1005	91.1336	68.0791	81	99	82	74	1700052K11Rik	antisense	chr11	3708
ENSMUSG00000099988.6	1.90078	-0.18993	3.50032	-0.0542607	0.956727	NA	4.26895	0	3.33416	0	4	0	3	0	1700054A03Rik	lincRNA	chr19	814
ENSMUSG00000070997.4	8.4404	1.08703	1.49787	0.725721	0.46801	NA	7.47066	3.60002	8.89109	13.7998	7	4	8	15	1700055D18Rik	antisense	chr4	3720
ENSMUSG00000044854.7	11.6124	0.139199	1.2821	0.108571	0.913542	NA	17.0758	6.30004	11.1139	11.9598	16	7	10	13	1700056E22Rik	protein_coding	chr1	1272
ENSMUSG00000084792.1	40.1211	0.0387578	0.698079	0.0555207	0.955724	0.999934	38.4205	40.5002	35.5643	45.9994	36	45	32	50	1700056N10Rik	lincRNA	chr16	1043
ENSMUSG00000074139.8	7.49426	0.953812	1.65549	0.576151	0.564513	NA	2.13447	6.30004	2.22277	19.3197	2	7	2	21	1700057G04Rik	protein_coding	chr9	1974
ENSMUSG00000078957.3	0.277846	1.334	4.96736	0.268553	0.788274	NA	0	0	1.11139	0	0	0	1	0	1700060C20Rik	antisense	chr2	605
ENSMUSG00000084970.1	1.2725	-1.38027	3.86226	-0.357375	0.720811	NA	1.06724	1.80001	2.22277	0	1	2	2	0	1700060J05Rik	antisense	chr4	1060
ENSMUSG00000024209.9	0.277846	1.334	4.96736	0.268553	0.788274	NA	0	0	1.11139	0	0	0	1	0	1700061G19Rik	protein_coding	chr17	2906
ENSMUSG00000084948.1	0.496806	0.0450723	4.9968	0.00902022	0.992803	NA	1.06724	0	0	0.919988	1	0	0	1	1700061H18Rik	antisense	chr18	1081
ENSMUSG00000114390.1	0.507843	2.4877	4.89227	0.508496	0.611106	NA	0	0	1.11139	0.919988	0	0	1	1	1700062C10Rik	lincRNA	chr14	1659
ENSMUSG00000102036.1	0.277846	1.334	4.96736	0.268553	0.788274	NA	0	0	1.11139	0	0	0	1	0	1700063K16Rik	transcribed_processed_pseudogene	chr16	1203
ENSMUSG00000082766.1	0.727849	-0.50547	4.88184	-0.103541	0.917534	NA	0	1.80001	1.11139	0	0	2	1	0	1700064H15Rik	protein_coding	chr3	394
ENSMUSG00000096655.2	0.769657	-1.21863	4.77276	-0.255331	0.798468	NA	1.06724	0.900005	1.11139	0	1	1	1	0	1700065D16Rik	antisense	chr9	2905
ENSMUSG00000073598.3	458.26	-0.428656	0.278103	-1.54136	0.12323	0.999934	569.905	475.203	312.299	475.634	534	528	281	517	1700066B19Rik	protein_coding	chr18	2837
ENSMUSG00000038323.3	181.315	-0.0444862	0.34979	-0.12718	0.898798	0.999934	184.632	183.601	176.71	180.318	173	204	159	196	1700066M21Rik	protein_coding	chr1	3235
ENSMUSG00000099378.1	0.454998	0.0444687	4.88765	0.00909818	0.992741	NA	0	0.900005	0	0.919988	0	1	0	1	1700067G17Rik	lincRNA	chr1	603
ENSMUSG00000046408.13	3.29888	1.2876	2.33581	0.551245	0.581466	NA	1.06724	2.70002	6.66831	2.75996	1	3	6	3	1700067K01Rik	protein_coding	chr8	1957
ENSMUSG00000086376.2	0.277846	1.334	4.96736	0.268553	0.788274	NA	0	0	1.11139	0	0	0	1	0	1700071G01Rik	antisense	chr5	367
ENSMUSG00000080980.1	0.454998	0.0444687	4.88765	0.00909818	0.992741	NA	0	0.900005	0	0.919988	0	1	0	1	1700071K01Rik	processed_pseudogene	chr11	819
ENSMUSG00000102231.1	0.277846	1.334	4.96736	0.268553	0.788274	NA	0	0	1.11139	0	0	0	1	0	1700074A21Rik	TEC	chr1	346
ENSMUSG00000100573.1	0.225001	-1.24388	4.96736	-0.250411	0.802269	NA	0	0.900005	0	0	0	1	0	0	1700081H04Rik	lincRNA	chr5	1128
ENSMUSG00000023737.14	2.38463	3.01491	3.07961	0.97899	0.327585	NA	1.06724	0	1.11139	7.3599	1	0	1	8	1700082M22Rik	antisense	chr8	2210
ENSMUSG00000086016.1	4.09327	0.52506	2.0718	0.253432	0.799935	NA	5.33619	1.80001	5.55693	3.67995	5	2	5	4	1700084C06Rik	antisense	chr9	750
ENSMUSG00000100747.4	4.80317	1.48554	1.98676	0.747719	0.45463	NA	1.06724	4.50003	4.44554	9.19988	1	5	4	10	1700084E18Rik	antisense	chr2	1429
ENSMUSG00000020548.10	0.277846	1.334	4.96736	0.268553	0.788274	NA	0	0	1.11139	0	0	0	1	0	1700086D15Rik	protein_coding	chr11	1093
ENSMUSG00000071265.10	3.45896	0.41861	2.22	0.188563	0.850435	NA	3.20171	2.70002	3.33416	4.59994	3	3	3	5	1700086L19Rik	transcribed_unitary_pseudogene	chr12	1075
ENSMUSG00000097080.7	49.9727	0.336015	0.641675	0.523654	0.600519	0.999934	55.4963	34.2002	52.2351	57.9592	52	38	47	63	1700086O06Rik	lincRNA	chr18	1931
ENSMUSG00000085085.2	1.94542	-1.11778	3.23747	-0.345265	0.729895	NA	3.20171	0.900005	0	3.67995	3	1	0	4	1700086P04Rik	lincRNA	chr4	1009
ENSMUSG00000033029.12	14.8707	-0.782534	1.13642	-0.688594	0.491079	NA	22.412	15.3001	8.89109	12.8798	21	17	8	14	1700088E04Rik	protein_coding	chr15	5292
ENSMUSG00000084811.2	0.266809	-1.24165	4.96683	-0.249988	0.802597	NA	1.06724	0	0	0	1	0	0	0	1700092E19Rik	lincRNA	chr13	2006
ENSMUSG00000078600.1	0.225001	-1.24388	4.96736	-0.250411	0.802269	NA	0	0.900005	0	0	0	1	0	0	1700092K14Rik	processed_transcript	chr11	395
ENSMUSG00000090840.2	1.44966	-0.772517	3.34284	-0.231096	0.81724	NA	1.06724	2.70002	1.11139	0.919988	1	3	1	1	1700092M07Rik	protein_coding	chr19	508
ENSMUSG00000020286.12	0.822502	0.571405	4.8531	0.11774	0.906274	NA	1.06724	0	2.22277	0	1	0	2	0	1700093K21Rik	protein_coding	chr11	2007
ENSMUSG00000101695.1	0.769657	-1.21863	4.77276	-0.255331	0.798468	NA	1.06724	0.900005	1.11139	0	1	1	1	0	1700094J05Rik	antisense	chr10	1012
ENSMUSG00000085407.1	0.229997	1.33177	4.96683	0.268132	0.788597	NA	0	0	0	0.919988	0	0	0	1	1700095J03Rik	antisense	chr7	1808
ENSMUSG00000099630.1	0.225001	-1.24388	4.96736	-0.250411	0.802269	NA	0	0.900005	0	0	0	1	0	0	1700096J18Rik	lincRNA	chr11	482
ENSMUSG00000101856.1	60.2077	-0.206625	0.575034	-0.359327	0.71935	0.999934	71.5049	57.6003	61.1262	50.5993	67	64	55	55	1700096K18Rik	lincRNA	chr5	1454
ENSMUSG00000099474.1	21.0955	-0.0462947	0.959341	-0.0482568	0.961512	NA	20.2775	21.6001	27.7846	14.7198	19	24	25	16	1700097N02Rik	antisense	chr17	845
ENSMUSG00000091906.2	0.225001	-1.24388	4.96736	-0.250411	0.802269	NA	0	0.900005	0	0	0	1	0	0	1700099I09Rik	antisense	chr13	885
ENSMUSG00000097675.2	0.951805	-0.75395	4.34432	-0.173549	0.86222	NA	1.06724	0.900005	0	1.83998	1	1	0	2	1700101I11Rik	processed_transcript	chr6	1868
ENSMUSG00000032611.9	11.3147	-0.0447271	1.27614	-0.0350487	0.972041	NA	9.60514	13.5001	11.1139	11.0399	9	15	10	12	1700102P08Rik	protein_coding	chr9	1236
ENSMUSG00000099923.1	1.5075	1.04507	3.27058	0.319537	0.74932	NA	1.06724	0.900005	2.22277	1.83998	1	1	2	2	1700105P06Rik	antisense	chr19	1772
ENSMUSG00000101009.6	3.16113	-1.62802	2.39255	-0.680454	0.496217	NA	3.20171	6.30004	2.22277	0.919988	3	7	2	1	1700108F19Rik	processed_transcript	chr14	3178
ENSMUSG00000106034.1	0.266809	-1.24165	4.96683	-0.249988	0.802597	NA	1.06724	0	0	0	1	0	0	0	1700108N06Rik	lincRNA	chr5	681
ENSMUSG00000084837.1	1.67466	-0.99499	3.16072	-0.314798	0.752915	NA	1.06724	3.60002	1.11139	0.919988	1	4	1	1	1700108N11Rik	antisense	chr2	917
ENSMUSG00000008307.11	66.3835	-0.185546	0.554046	-0.334894	0.737705	0.999934	57.6308	84.6005	58.9034	64.3992	54	94	53	70	1700109H08Rik	protein_coding	chr5	3062
ENSMUSG00000097267.2	0.229997	1.33177	4.96683	0.268132	0.788597	NA	0	0	0	0.919988	0	0	0	1	1700109K24Rik	antisense	chr15	1492
ENSMUSG00000087047.8	47.5045	0.505495	0.647919	0.780181	0.435284	0.999934	38.4205	39.6002	46.6782	65.3191	36	44	42	71	1700110K17Rik	antisense	chr9	1028
ENSMUSG00000100511.1	0.266809	-1.24165	4.96683	-0.249988	0.802597	NA	1.06724	0	0	0	1	0	0	0	1700111N16Rik	antisense	chrX	1133
ENSMUSG00000097527.2	7.59896	0.202394	1.54224	0.131234	0.89559	NA	5.33619	9.00005	7.7797	8.27989	5	10	7	9	1700112J16Rik	lincRNA	chr7	2490
ENSMUSG00000096935.5	17.599	0.541321	1.03922	0.520894	0.602441	NA	13.8741	14.4001	25.5619	16.5598	13	16	23	18	1700113A16Rik	antisense	chr3	1095
ENSMUSG00000047129.11	0.266809	-1.24165	4.96683	-0.249988	0.802597	NA	1.06724	0	0	0	1	0	0	0	1700113H08Rik	protein_coding	chr10	1550
ENSMUSG00000100593.1	0.95285	-0.819466	4.78084	-0.171406	0.863904	NA	0	2.70002	1.11139	0	0	3	1	0	1700119H24Rik	antisense	chr16	588
ENSMUSG00000082488.2	0.721808	-1.21757	4.86122	-0.250466	0.802227	NA	1.06724	0.900005	0	0.919988	1	1	0	1	1700119I11Rik	antisense	chr13	405
ENSMUSG00000045391.4	3.88318	1.09915	2.16428	0.507861	0.611551	NA	1.06724	4.50003	4.44554	5.51993	1	5	4	6	1700120B22Rik	bidirectional_promoter_lncRNA	chr10	464
ENSMUSG00000100599.2	3.27077	0.326621	2.28709	0.142811	0.88644	NA	4.26895	1.80001	3.33416	3.67995	4	2	3	4	1700120C14Rik	processed_transcript	chr15	1952
ENSMUSG00000099579.1	0.726803	0.594751	4.88436	0.121766	0.903084	NA	1.06724	0	0	1.83998	1	0	0	2	1700120K04Rik	antisense	chr7	546
ENSMUSG00000087685.1	3.08646	-0.408108	2.39311	-0.170535	0.86459	NA	2.13447	4.50003	1.11139	4.59994	2	5	1	5	1700122E12Rik	processed_transcript	chr8	709
ENSMUSG00000099735.1	0.229997	1.33177	4.96683	0.268132	0.788597	NA	0	0	0	0.919988	0	0	0	1	1700122H20Rik	antisense	chr17	421
ENSMUSG00000085614.1	12.9856	0.185964	1.2046	0.154378	0.877312	NA	18.143	7.20004	15.5594	11.0399	17	8	14	12	1700123M08Rik	processed_transcript	chr4	1260
ENSMUSG00000086080.7	0.544656	0.0456629	4.88765	0.00934252	0.992546	NA	1.06724	0	1.11139	0	1	0	1	0	1700123O12Rik	lincRNA	chr4	1534
ENSMUSG00000040822.7	397.849	-0.0654278	0.257933	-0.253662	0.799757	0.999934	403.416	409.502	412.324	366.155	378	455	371	398	1700123O20Rik	protein_coding	chr14	1935
ENSMUSG00000099354.6	5.58757	-0.00501713	1.79234	-0.0027992	0.997767	NA	5.33619	5.40003	3.33416	8.27989	5	6	3	9	1700124L16Rik	antisense	chr6	1110
ENSMUSG00000110938.1	0.266809	-1.24165	4.96683	-0.249988	0.802597	NA	1.06724	0	0	0	1	0	0	0	1700124M09Rik	lincRNA	chr10	305
ENSMUSG00000018479.12	0.277846	1.334	4.96736	0.268553	0.788274	NA	0	0	1.11139	0	0	0	1	0	1700125H20Rik	protein_coding	chr11	995
ENSMUSG00000099945.1	0.229997	1.33177	4.96683	0.268132	0.788597	NA	0	0	0	0.919988	0	0	0	1	1700126A01Rik	lincRNA	chr1	2061
ENSMUSG00000107802.1	0.544656	0.0456629	4.88765	0.00934252	0.992546	NA	1.06724	0	1.11139	0	1	0	1	0	1700126G02Rik	antisense	chr6	725
ENSMUSG00000100182.6	9.64377	-0.517207	1.38209	-0.37422	0.708241	NA	12.8068	9.90006	6.66831	9.19988	12	11	6	10	1810006J02Rik	lincRNA	chr1	1882
ENSMUSG00000100094.1	53.7591	0.439792	0.612424	0.718116	0.472686	0.999934	41.6223	49.5003	67.7945	56.1193	39	55	61	61	1810008I18Rik	lincRNA	chr7	2463
ENSMUSG00000071653.9	4.793	-0.304932	1.93928	-0.15724	0.875056	NA	8.5379	2.70002	3.33416	4.59994	8	3	3	5	1810009A15Rik	protein_coding	chr19	1444
ENSMUSG00000109305.1	73.0202	-0.798285	0.573507	-1.39194	0.163942	0.999934	91.7824	87.3005	31.1188	81.8789	86	97	28	89	1810010D01Rik	protein_coding	chr7	1278
ENSMUSG00000078607.5	17.9911	-0.98259	1.02851	-0.95535	0.3394	NA	23.4792	24.3001	12.2252	11.9598	22	27	11	13	1810010H24Rik	protein_coding	chr11	1685
ENSMUSG00000056329.3	0.266809	-1.24165	4.96683	-0.249988	0.802597	NA	1.06724	0	0	0	1	0	0	0	1810010K12Rik	processed_transcript	chr2	2289
ENSMUSG00000087595.1	0.266809	-1.24165	4.96683	-0.249988	0.802597	NA	1.06724	0	0	0	1	0	0	0	1810012K08Rik	lincRNA	chr2	574
ENSMUSG00000099825.1	10.4557	1.19232	1.35206	0.881851	0.377858	NA	8.5379	4.50003	12.2252	16.5598	8	5	11	18	1810012K16Rik	lincRNA	chr8	547
ENSMUSG00000028177.13	0.684995	0.570179	4.85336	0.117481	0.906479	NA	0	0.900005	0	1.83998	0	1	0	2	1810013D15Rik	antisense	chr3	2121
ENSMUSG00000022507.6	1574.65	0.0665986	0.17381	0.383169	0.701595	0.999934	1582.71	1491.31	1714.87	1509.7	1483	1657	1543	1641	1810013L24Rik	protein_coding	chr16	4960
ENSMUSG00000097412.2	63.9278	0.342102	0.563844	0.606732	0.544029	0.999934	52.2946	60.3003	77.797	65.3191	49	67	70	71	1810014B01Rik	transcribed_unprocessed_pseudogene	chr10	2652
ENSMUSG00000106838.1	27.0634	0.617695	0.853062	0.724092	0.469009	0.999934	22.412	19.8001	25.5619	40.4795	21	22	23	44	1810017P11Rik	TEC	chr5	558
ENSMUSG00000101088.6	0.266809	-1.24165	4.96683	-0.249988	0.802597	NA	1.06724	0	0	0	1	0	0	0	1810018F18Rik	transcribed_unprocessed_pseudogene	chr19	2773
ENSMUSG00000086390.7	273.573	0.301101	0.297134	1.01335	0.310893	0.999934	249.734	239.401	330.082	275.076	234	266	297	299	1810019D21Rik	processed_transcript	chr8	1551
ENSMUSG00000097115.2	4.51645	1.09311	1.99076	0.549091	0.582943	NA	4.26895	1.80001	5.55693	6.43992	4	2	5	7	1810019N24Rik	lincRNA	chr7	1555
ENSMUSG00000087331.8	22.8471	-0.431392	0.912542	-0.472737	0.636401	NA	24.5465	27.9002	17.7822	21.1597	23	31	16	23	1810021B22Rik	antisense	chr15	896
ENSMUSG00000078784.8	517.591	0.147538	0.236295	0.624379	0.532378	0.999934	502.669	477.003	601.26	489.434	471	530	541	532	1810022K09Rik	protein_coding	chr3	1753
ENSMUSG00000044145.2	15.4745	-0.0492848	1.10261	-0.0446984	0.964348	NA	19.2103	12.6001	14.448	15.6398	18	14	13	17	1810024B03Rik	protein_coding	chr2	3550
ENSMUSG00000101970.6	841.453	-0.122802	0.205303	-0.598149	0.54974	0.999934	853.79	899.105	855.767	757.15	800	999	770	823	1810026B05Rik	processed_transcript	chr7	8620
ENSMUSG00000114985.1	0.491811	-2.39757	4.89228	-0.490072	0.624083	NA	1.06724	0.900005	0	0	1	1	0	0	1810028F09Rik	lincRNA	chr14	1248
ENSMUSG00000044148.6	527.143	0.0932978	0.233011	0.4004	0.688862	0.999934	513.341	506.703	524.574	563.953	481	563	472	613	1810030O07Rik	protein_coding	chrX	2699
ENSMUSG00000020812.17	183.304	-0.158858	0.349129	-0.455012	0.6491	0.999934	231.59	156.601	197.827	147.198	217	174	178	160	1810032O08Rik	protein_coding	chr11	2776
ENSMUSG00000097101.3	74.1404	-0.335518	0.522057	-0.642684	0.520429	0.999934	85.379	80.1005	66.6831	64.3992	80	89	60	70	1810034E14Rik	antisense	chr13	2245
ENSMUSG00000054091.9	1105.1	-0.0171418	0.188872	-0.0907592	0.927684	0.999934	1124.87	1098.01	1055.82	1141.71	1054	1220	950	1241	1810037I17Rik	protein_coding	chr3	1160
ENSMUSG00000102112.1	5.5687	-0.458285	1.78476	-0.256777	0.797351	NA	8.5379	4.50003	5.55693	3.67995	8	5	5	4	1810041H14Rik	antisense	chr14	851
ENSMUSG00000020284.16	99.7459	0.234355	0.459911	0.509566	0.610355	0.999934	84.3117	99.0006	114.473	101.199	79	110	103	110	1810043G02Rik	protein_coding	chr10	6627
ENSMUSG00000100680.1	17.2068	0.819858	1.04927	0.78136	0.434591	NA	13.8741	10.8001	26.6733	17.4798	13	12	24	19	1810044D09Rik	lincRNA	chr6	486
ENSMUSG00000036027.11	16.9291	-2.13589	1.16327	-1.83612	0.0663403	NA	25.6137	27.0002	2.22277	12.8798	24	30	2	14	1810046K07Rik	protein_coding	chr9	1437
ENSMUSG00000097221.1	11.6008	-0.00547572	1.27564	-0.00429253	0.996575	NA	10.6724	11.7001	16.6708	7.3599	10	13	15	8	1810049J17Rik	protein_coding	chr15	462
ENSMUSG00000035372.1	201.822	-0.41668	0.336071	-1.23986	0.215028	0.999934	217.716	243.001	153.371	193.197	204	270	138	210	1810055G02Rik	protein_coding	chr19	1882
ENSMUSG00000073155.12	148.731	-0.108996	0.384203	-0.283694	0.776645	0.999934	157.951	149.401	163.374	124.198	148	166	147	135	1810058I24Rik	lincRNA	chr6	2784
ENSMUSG00000086340.1	0.544656	0.0456629	4.88765	0.00934252	0.992546	NA	1.06724	0	1.11139	0	1	0	1	0	1810059C17Rik	processed_transcript	chr2	487
ENSMUSG00000108207.2	33.9422	0.0890493	0.756739	0.117675	0.906325	0.999934	35.2188	30.6002	32.2302	37.7195	33	34	29	41	1810059H22Rik	processed_transcript	chr5	5024
ENSMUSG00000027713.6	25.5604	0.141984	0.898664	0.157994	0.874461	NA	32.0171	17.1001	20.0049	33.1196	30	19	18	36	1810062G17Rik	protein_coding	chr3	911
ENSMUSG00000084925.8	15.4725	1.99866	1.17938	1.69466	0.0901391	NA	11.7396	2.70002	24.4505	22.9997	11	3	22	25	1810062O18Rik	antisense	chr14	1816
ENSMUSG00000085551.1	19.6813	-0.609288	1.00767	-0.604651	0.545411	NA	20.2775	26.1001	22.2277	10.1199	19	29	20	11	1810063I02Rik	lincRNA	chr11	274
ENSMUSG00000090925.2	9.87014	0.7305	1.39943	0.521997	0.601672	NA	12.8068	3.60002	11.1139	11.9598	12	4	10	13	1810064F22Rik	antisense	chr9	2753
ENSMUSG00000013653.2	7988.18	-0.699279	0.532665	-1.31279	0.189253	0.999934	8833.52	9980.16	3449.74	9689.31	8277	11089	3104	10532	1810065E05Rik	protein_coding	chr11	926
ENSMUSG00000087165.7	56.2807	-0.139943	0.601625	-0.232608	0.816066	0.999934	75.7738	44.1002	55.5693	49.6793	71	49	50	54	2010001A14Rik	processed_transcript	chr11	714
ENSMUSG00000051606.5	73.6147	0.0195808	0.523656	0.0373924	0.970172	0.999934	71.5049	74.7004	75.5742	72.679	67	83	68	79	2010001K21Rik	processed_transcript	chr13	3630
ENSMUSG00000111296.1	5.84913	-2.11115	1.84	-1.14736	0.251232	NA	9.60514	9.00005	1.11139	3.67995	9	10	1	4	2010001M07Rik	antisense	chr9	364
ENSMUSG00000042041.6	374.067	0.626024	0.28229	2.21767	0.0265776	0.644452	231.59	364.502	451.223	448.954	217	405	406	488	2010003K11Rik	protein_coding	chr19	1165
ENSMUSG00000095620.7	11.0498	-0.848962	1.31468	-0.645756	0.518437	NA	13.8741	13.5001	12.2252	4.59994	13	15	11	5	2010005H15Rik	protein_coding	chr16	639
ENSMUSG00000044694.2	18.233	-1.27442	1.02972	-1.23763	0.215853	NA	28.8154	22.5001	13.3366	8.27989	27	25	12	9	2010007H06Rik	antisense	chr9	4934
ENSMUSG00000107761.1	30.0063	0.126631	0.800309	0.158228	0.874277	0.999934	26.6809	30.6002	27.7846	34.9595	25	34	25	38	2010008C14Rik	TEC	chr6	593
ENSMUSG00000100860.1	1.95146	-0.131866	2.90103	-0.0454547	0.963745	NA	2.13447	1.80001	1.11139	2.75996	2	2	1	3	2010009K17Rik	antisense	chr2	567
ENSMUSG00000102047.1	50.3766	1.21628	0.631581	1.92577	0.0541329	0.908759	30.9499	29.7002	70.0173	70.8391	29	33	63	77	2010010A06Rik	transcribed_processed_pseudogene	chr18	1223
ENSMUSG00000096983.1	4.0612	-1.06932	2.08867	-0.511964	0.608676	NA	7.47066	3.60002	3.33416	1.83998	7	4	3	2	2010015M23Rik	lincRNA	chr11	1199
ENSMUSG00000091575.2	397.571	0.904627	0.25758	3.51202	0.000444711	0.0484324	283.885	270.002	515.683	520.713	266	300	464	566	2010016I18Rik	processed_transcript	chr3	3697
ENSMUSG00000104368.1	34.3409	-0.131795	0.760524	-0.173294	0.86242	0.999934	21.3447	52.2003	23.3391	40.4795	20	58	21	44	2010103J01Rik	antisense	chr1	388
ENSMUSG00000100738.1	2.03137	4.48772	3.43895	1.30497	0.191904	NA	0	0	4.44554	3.67995	0	0	4	4	2010106C02Rik	antisense	chr17	660
ENSMUSG00000025528.10	41.4197	0.498526	0.709416	0.702727	0.482226	0.999934	35.2188	29.7002	72.2401	28.5196	33	33	65	31	2010106E10Rik	protein_coding	chrX	1287
ENSMUSG00000029384.5	15.1538	1.65285	1.13674	1.45403	0.145938	NA	9.60514	5.40003	24.4505	21.1597	9	6	22	23	2010109A12Rik	protein_coding	chr5	1275
ENSMUSG00000063522.5	1942.77	1.33356	0.201088	6.63175	3.31726e-11	2.14958e-08	924.227	1298.71	2995.18	2552.97	866	1443	2695	2775	2010109I03Rik	protein_coding	chr15	3302
ENSMUSG00000107558.1	1.21861	-1.37896	3.92692	-0.351156	0.725471	NA	2.13447	0.900005	0	1.83998	2	1	0	2	2010109P13Rik	TEC	chr6	392
ENSMUSG00000098434.1	3.81826	-0.132606	2.19287	-0.0604714	0.95178	NA	3.20171	3.60002	1.11139	7.3599	3	4	1	8	2010110E17Rik	lincRNA	chr8	879
ENSMUSG00000097755.1	6.28681	0.384737	1.68383	0.228489	0.819266	NA	5.33619	5.40003	8.89109	5.51993	5	6	8	6	2010110K18Rik	lincRNA	chr18	2854
ENSMUSG00000021458.17	2136.94	0.103334	0.164063	0.629846	0.528795	0.999934	2021.35	2099.71	2226.11	2200.61	1894	2333	2003	2392	2010111I01Rik	protein_coding	chr13	11294
ENSMUSG00000063018.6	6.91679	0.235501	1.63356	0.144165	0.88537	NA	3.20171	9.90006	4.44554	10.1199	3	11	4	11	2010204K13Rik	processed_transcript	chrX	1583
ENSMUSG00000026090.16	1207.04	0.264124	0.186045	1.41967	0.155703	0.999934	1038.42	1156.51	1331.44	1301.78	973	1285	1198	1415	2010300C02Rik	protein_coding	chr1	5075
ENSMUSG00000100714.6	0.774653	1.30561	4.75965	0.274308	0.783848	NA	1.06724	0	1.11139	0.919988	1	0	1	1	2010308F09Rik	lincRNA	chrX	704
ENSMUSG00000101268.6	1.4068	-0.857203	3.67157	-0.23347	0.815396	NA	1.06724	1.80001	0	2.75996	1	2	0	3	2010310C07Rik	antisense	chr6	2398
ENSMUSG00000074829.10	855.337	-0.140223	0.200795	-0.698339	0.484965	0.999934	922.093	872.105	810.2	816.949	864	969	729	888	2010315B03Rik	protein_coding	chr9	3914
ENSMUSG00000100691.1	109.45	-0.326706	0.437473	-0.746801	0.455184	0.999934	132.337	111.601	100.025	93.8388	124	124	90	102	2010320M18Rik	lincRNA	chr8	1009
ENSMUSG00000089983.1	2.29818	3.25272	3.04307	1.06889	0.285118	NA	1.06724	0	4.44554	3.67995	1	0	4	4	2010320O07Rik	processed_transcript	chr18	525
ENSMUSG00000108479.1	0.225001	-1.24388	4.96736	-0.250411	0.802269	NA	0	0.900005	0	0	0	1	0	0	2200002A13Rik	TEC	chr7	709
ENSMUSG00000030587.5	3872.29	0.174706	0.151466	1.15343	0.248732	0.999934	3847.39	3421.82	4454.43	3765.51	3605	3802	4008	4093	2200002D01Rik	protein_coding	chr7	1564
ENSMUSG00000013083.8	7.8342	1.75823	1.57087	1.11927	0.263024	NA	2.13447	5.40003	10.0025	13.7998	2	6	9	15	2200002J24Rik	protein_coding	chr7	616
ENSMUSG00000097165.1	1.96145	2.13421	3.25037	0.656605	0.511435	NA	2.13447	0	1.11139	4.59994	2	0	1	5	2210008F06Rik	lincRNA	chr11	1082
ENSMUSG00000029882.5	0.277846	1.334	4.96736	0.268553	0.788274	NA	0	0	1.11139	0	0	0	1	0	2210010C04Rik	protein_coding	chr6	2142
ENSMUSG00000074217.8	44.545	-0.192202	0.663738	-0.289576	0.772141	0.999934	57.6308	37.8002	47.7896	34.9595	54	42	43	38	2210011C24Rik	protein_coding	chr8	1413
ENSMUSG00000101791.1	0.774653	1.30561	4.75965	0.274308	0.783848	NA	1.06724	0	1.11139	0.919988	1	0	1	1	2210011K15Rik	lincRNA	chr1	1741
ENSMUSG00000021550.6	1477.86	0.403649	0.18216	2.21591	0.026698	0.644452	1189.97	1356.31	1745.99	1619.18	1115	1507	1571	1760	2210016F16Rik	protein_coding	chr13	3051
ENSMUSG00000029559.15	360.13	-0.251249	0.266179	-0.94391	0.345216	0.999934	416.223	367.202	337.861	319.236	390	408	304	347	2210016L21Rik	protein_coding	chr5	3303
ENSMUSG00000113800.1	25.5604	-0.0368446	0.878337	-0.0419481	0.96654	NA	27.7482	23.4001	18.8936	32.1996	26	26	17	35	2210039B01Rik	lincRNA	chr12	1044
ENSMUSG00000039563.6	4.33793	-1.25942	2.03367	-0.619283	0.53573	NA	4.26895	8.10005	2.22277	2.75996	4	9	2	3	2210406O10Rik	lincRNA	chr5	2472
ENSMUSG00000037145.14	702.019	-1.19482	0.851542	-1.40313	0.160579	0.999934	735.326	1035.01	165.596	872.149	689	1150	149	948	2210407C18Rik	protein_coding	chr11	1399
ENSMUSG00000087380.7	2.82681	1.01078	2.4803	0.407522	0.683625	NA	3.20171	0.900005	4.44554	2.75996	3	1	4	3	2210408F21Rik	processed_transcript	chr6	2406
ENSMUSG00000071252.6	112.412	0.0379099	0.431747	0.0878059	0.930031	0.999934	112.06	109.801	110.027	117.758	105	122	99	128	2210408I21Rik	protein_coding	chr13	5948
ENSMUSG00000085563.2	0.780694	0.595588	4.88183	0.122001	0.902898	NA	0	0.900005	2.22277	0	0	1	2	0	2210411M09Rik	antisense	chr1	643
ENSMUSG00000107216.1	0.229997	1.33177	4.96683	0.268132	0.788597	NA	0	0	0	0.919988	0	0	0	1	2210412B16Rik	TEC	chr5	498
ENSMUSG00000085394.1	0.266809	-1.24165	4.96683	-0.249988	0.802597	NA	1.06724	0	0	0	1	0	0	0	2210414B05Rik	lincRNA	chr4	872
ENSMUSG00000111043.1	1.24069	2.29044	3.8837	0.589757	0.555354	NA	0	0.900005	2.22277	1.83998	0	1	2	2	2210414F02Rik	lincRNA	chr9	396
ENSMUSG00000086494.1	9.22318	0.8114	1.41776	0.572312	0.56711	NA	5.33619	8.10005	13.3366	10.1199	5	9	12	11	2210417A02Rik	lincRNA	chr5	550
ENSMUSG00000078894.9	1.52353	4.07267	3.86978	1.05243	0.292603	NA	0	0	3.33416	2.75996	0	0	3	3	2210418O10Rik	protein_coding	chr2	3936
ENSMUSG00000032403.8	140.057	0.0380687	0.392213	0.0970613	0.922678	0.999934	149.413	126.001	163.374	121.438	140	140	147	132	2300009A05Rik	protein_coding	chr9	2000
ENSMUSG00000097354.7	183.4	0.433636	0.386312	1.1225	0.261648	0.999934	201.708	116.101	186.713	229.077	189	129	168	249	2310001H17Rik	lincRNA	chr6	7241
ENSMUSG00000053353.5	0.277846	1.334	4.96736	0.268553	0.788274	NA	0	0	1.11139	0	0	0	1	0	2310001K24Rik	antisense	chr2	740
ENSMUSG00000097178.7	0.266809	-1.24165	4.96683	-0.249988	0.802597	NA	1.06724	0	0	0	1	0	0	0	2310002F09Rik	processed_transcript	chr7	4492
ENSMUSG00000110916.1	1.04146	0.834461	4.19109	0.199104	0.842182	NA	2.13447	0	1.11139	0.919988	2	0	1	1	2310003N18Rik	lincRNA	chr9	458
ENSMUSG00000087254.1	0.229997	1.33177	4.96683	0.268132	0.788597	NA	0	0	0	0.919988	0	0	0	1	2310005A03Rik	lincRNA	chr2	1398
ENSMUSG00000034159.12	140.78	0.0971864	0.390345	0.248975	0.80338	0.999934	138.741	133.201	152.26	138.918	130	148	137	151	2310007B03Rik	protein_coding	chr1	2368
ENSMUSG00000100335.2	1.54431	0.0457493	3.23717	0.0141325	0.988724	NA	2.13447	0.900005	2.22277	0.919988	2	1	2	1	2310008N11Rik	lincRNA	chr8	1805
ENSMUSG00000098332.2	181.877	0.000596202	0.34937	0.00170651	0.998638	0.999934	172.892	190.801	173.376	190.437	162	212	156	207	2310009A05Rik	processed_transcript	chr9	2999
ENSMUSG00000079283.2	95.0454	0.0801576	0.468026	0.171267	0.864013	0.999934	104.589	81.0005	98.9133	95.6787	98	90	89	104	2310009B15Rik	protein_coding	chr1	1750
ENSMUSG00000097162.2	34.1167	0.310832	0.755015	0.41169	0.680567	0.999934	34.1516	27.0002	36.6757	38.6395	32	30	33	42	2310010J17Rik	bidirectional_promoter_lncRNA	chr7	603
ENSMUSG00000020133.8	533.873	0.178284	0.239691	0.743808	0.456993	0.999934	458.912	543.603	595.703	537.273	430	604	536	584	2310011J03Rik	protein_coding	chr10	1649
ENSMUSG00000085945.3	0.9568	0.909109	4.77362	0.190444	0.848961	NA	1.06724	0	0	2.75996	1	0	0	3	2310014F06Rik	bidirectional_promoter_lncRNA	chr7	2810
ENSMUSG00000097729.2	68.7066	0.408272	0.553689	0.737366	0.4609	0.999934	53.3619	63.9004	92.245	65.3191	50	71	83	71	2310015A10Rik	processed_transcript	chr12	2330
ENSMUSG00000070574.2	19.1235	0.0725629	1.01386	0.0715709	0.942943	NA	20.2775	16.2001	13.3366	26.6796	19	18	12	29	2310016G11Rik	antisense	chr7	1558
ENSMUSG00000049643.15	90.7997	0.167988	0.477034	0.35215	0.724726	0.999934	84.3117	86.4005	86.6881	105.799	79	96	78	115	2310022A10Rik	protein_coding	chr7	4780
ENSMUSG00000031983.7	262.38	-0.0689035	0.304296	-0.226436	0.820863	0.999934	259.339	277.202	275.624	237.357	243	308	248	258	2310022B05Rik	protein_coding	chr8	3307
ENSMUSG00000032062.2	247.941	-0.0356316	0.307278	-0.115959	0.907685	0.999934	233.725	268.202	226.723	263.117	219	298	204	286	2310030G06Rik	protein_coding	chr9	1979
ENSMUSG00000097457.1	0.811465	-0.480044	4.85336	-0.0989094	0.92121	NA	2.13447	0	1.11139	0	2	0	1	0	2310031A07Rik	lincRNA	chr11	990
ENSMUSG00000020441.6	133.195	0.114193	0.404429	0.282358	0.777669	0.999934	114.194	142.201	141.146	135.238	107	158	127	147	2310033P09Rik	protein_coding	chr11	1285
ENSMUSG00000068078.4	2.87224	-3.54025	2.7856	-1.27091	0.203761	NA	4.26895	6.30004	0	0.919988	4	7	0	1	2310034C09Rik	protein_coding	chr16	946
ENSMUSG00000099655.2	59.2102	0.65329	0.582781	1.12099	0.262293	0.999934	46.9584	45.0003	66.6831	78.199	44	50	60	85	2310034G01Rik	protein_coding	chr19	1373
ENSMUSG00000062619.6	274.098	-0.135304	0.297096	-0.455422	0.648805	0.999934	297.759	274.502	292.294	231.837	279	305	263	252	2310039H08Rik	protein_coding	chr17	762
ENSMUSG00000100550.2	0.229997	1.33177	4.96683	0.268132	0.788597	NA	0	0	0	0.919988	0	0	0	1	2310039L15Rik	lincRNA	chr10	4487
ENSMUSG00000101655.1	21.1772	-0.729051	0.949684	-0.767677	0.442679	NA	26.6809	26.1001	14.448	17.4798	25	29	13	19	2310040G24Rik	lincRNA	chr6	775
ENSMUSG00000101746.1	1.0525	1.75331	4.17073	0.420385	0.674204	NA	1.06724	0	2.22277	0.919988	1	0	2	1	2310043L19Rik	lincRNA	chr1	698
ENSMUSG00000102106.2	5.67352	1.34794	1.79929	0.749155	0.453764	NA	2.13447	4.50003	7.7797	8.27989	2	5	7	9	2310043O21Rik	lincRNA	chr15	622
ENSMUSG00000108732.1	12.8971	0.439281	1.20905	0.363327	0.716361	NA	8.5379	13.5001	16.6708	12.8798	8	15	15	14	2310043P16Rik	TEC	chr7	3881
ENSMUSG00000085080.1	2.56	1.32538	2.59704	0.510343	0.609811	NA	2.13447	0.900005	4.44554	2.75996	2	1	4	3	2310044K18Rik	antisense	chr7	618
ENSMUSG00000040177.10	217.69	-0.221856	0.326605	-0.679277	0.496962	0.999934	211.313	258.301	197.827	203.317	198	287	178	221	2310057M21Rik	protein_coding	chr7	13618
ENSMUSG00000085379.1	27.3398	1.2063	0.849358	1.42025	0.155536	0.999934	12.8068	20.7001	34.453	41.3995	12	23	31	45	2310058D17Rik	processed_transcript	chr11	3201
ENSMUSG00000050705.15	244.098	0.0603818	0.327677	0.184273	0.8538	0.999934	212.38	264.601	282.292	217.117	199	294	254	236	2310061I04Rik	protein_coding	chr17	2414
ENSMUSG00000050704.3	0.229997	1.33177	4.96683	0.268132	0.788597	NA	0	0	0	0.919988	0	0	0	1	2310061N02Rik	protein_coding	chr16	794
ENSMUSG00000100084.2	3.59042	0.802055	2.24226	0.357699	0.720568	NA	5.33619	0.900005	4.44554	3.67995	5	1	4	4	2310068J16Rik	antisense	chr15	1130
ENSMUSG00000100291.6	14.0433	0.673113	1.15226	0.584165	0.559109	NA	11.7396	9.90006	18.8936	15.6398	11	11	17	17	2310069B03Rik	lincRNA	chr6	1902
ENSMUSG00000105858.1	1.19284	2.04081	3.95034	0.516616	0.605424	NA	0	0.900005	1.11139	2.75996	0	1	1	3	2310074N15Rik	lincRNA	chr5	582
ENSMUSG00000045331.3	195.027	0.928301	0.373339	2.48649	0.0129012	0.433158	118.463	145.801	318.968	196.877	111	162	287	214	2310079G19Rik	protein_coding	chr16	881
ENSMUSG00000085020.1	0.229997	1.33177	4.96683	0.268132	0.788597	NA	0	0	0	0.919988	0	0	0	1	2310081O03Rik	lincRNA	chr4	759
ENSMUSG00000106223.1	3.60516	-0.265419	2.27481	-0.116677	0.907116	NA	8.5379	0.900005	2.22277	2.75996	8	1	2	3	2400006E01Rik	lincRNA	chr3	874
ENSMUSG00000045411.16	700.572	-0.349548	0.21432	-1.63096	0.102898	0.999934	828.176	738.004	692.393	543.713	776	820	623	591	2410002F23Rik	protein_coding	chr7	5233
ENSMUSG00000036873.13	271.117	0.207077	0.311334	0.665127	0.505969	0.999934	221.985	281.702	316.745	264.037	208	313	285	287	2410004B18Rik	protein_coding	chr3	2029
ENSMUSG00000071398.8	0.780694	0.595588	4.88183	0.122001	0.902898	NA	0	0.900005	2.22277	0	0	1	2	0	2410004P03Rik	protein_coding	chr12	3537
ENSMUSG00000086841.1	368.769	-0.0757357	0.263398	-0.287534	0.773704	0.999934	422.626	334.802	395.653	321.996	396	372	356	350	2410006H16Rik	processed_transcript	chr11	462
ENSMUSG00000049760.6	1001.47	0.0210348	0.201015	0.104643	0.916659	0.999934	995.732	983.706	1146.95	879.508	933	1093	1032	956	2410015M20Rik	protein_coding	chr17	1169
ENSMUSG00000038311.13	0.225001	-1.24388	4.96736	-0.250411	0.802269	NA	0	0.900005	0	0	0	1	0	0	2410017I17Rik	lincRNA	chr17	2518
ENSMUSG00000073164.11	8.72977	0.276982	1.53546	0.180391	0.856846	NA	9.60514	4.50003	3.33416	17.4798	9	5	3	19	2410018L13Rik	lincRNA	chr12	4122
ENSMUSG00000100572.1	0.266809	-1.24165	4.96683	-0.249988	0.802597	NA	1.06724	0	0	0	1	0	0	0	2410021H03Rik	antisense	chr17	764
ENSMUSG00000100017.2	65.2947	0.106056	0.558257	0.189977	0.849327	0.999934	69.3704	56.7003	63.349	71.7591	65	63	57	78	2410022M11Rik	bidirectional_promoter_lncRNA	chr14	1911
ENSMUSG00000044387.5	1.81112	-0.265748	3.03289	-0.0876218	0.930177	NA	3.20171	0.900005	2.22277	0.919988	3	1	2	1	2410080I02Rik	lincRNA	chr19	414
ENSMUSG00000032840.7	227.957	-0.282461	0.35418	-0.797508	0.425156	0.999934	203.842	297.002	238.948	172.038	191	330	215	187	2410131K14Rik	protein_coding	chr5	5649
ENSMUSG00000096917.2	19.6876	-0.534278	1.01947	-0.524071	0.600229	NA	27.7482	18.0001	10.0025	22.9997	26	20	9	25	2500002B13Rik	processed_transcript	chr8	2712
ENSMUSG00000073236.4	86.7905	0.458784	0.486375	0.943273	0.345541	0.999934	78.9756	67.5004	102.247	98.4387	74	75	92	107	2500004C02Rik	processed_transcript	chr2	2147
ENSMUSG00000071632.10	272.55	0.269024	0.29743	0.904493	0.365734	0.999934	275.347	220.501	310.077	284.276	258	245	279	309	2510002D24Rik	protein_coding	chr16	1486
ENSMUSG00000043391.10	682.127	-0.0776419	0.215674	-0.359998	0.718849	0.999934	658.485	743.404	662.386	664.231	617	826	596	722	2510009E07Rik	protein_coding	chr16	6564
ENSMUSG00000106825.1	53.0886	0.175474	0.613771	0.285895	0.774959	0.999934	48.0257	51.3003	63.349	49.6793	45	57	57	54	2510016D11Rik	TEC	chr5	985
ENSMUSG00000104891.1	7.12398	-0.56692	1.62413	-0.349061	0.727043	NA	5.33619	11.7001	7.7797	3.67995	5	13	7	4	2510017J16Rik	antisense	chr5	1263
ENSMUSG00000044496.6	1791.01	0.134943	0.175692	0.768068	0.442447	0.999934	1733.19	1668.61	2107.19	1655.06	1624	1854	1896	1799	2510039O18Rik	protein_coding	chr4	2731
ENSMUSG00000066175.2	41.0125	-0.740144	0.695028	-1.06491	0.286916	0.999934	61.8998	41.4002	32.2302	28.5196	58	46	29	31	2510046G10Rik	antisense	chr7	1052
ENSMUSG00000052419.7	348.019	0.176085	0.279282	0.63049	0.528374	0.999934	323.373	325.802	430.106	312.796	303	362	387	340	2610001J05Rik	protein_coding	chr6	3784
ENSMUSG00000031242.7	611.209	-0.0105511	0.225092	-0.0468745	0.962613	0.999934	595.518	628.204	541.245	679.871	558	698	487	739	2610002M06Rik	protein_coding	chrX	6337
ENSMUSG00000071793.12	162.243	-0.227141	0.367582	-0.617934	0.536619	0.999934	166.489	183.601	148.926	149.958	156	204	134	163	2610005L07Rik	transcribed_unprocessed_pseudogene	chr8	4163
ENSMUSG00000060301.6	355.765	0.208008	0.267619	0.777253	0.43701	0.999934	345.785	315.002	382.317	379.955	324	350	344	413	2610008E11Rik	protein_coding	chr10	5940
ENSMUSG00000102474.1	1.76432	-2.0564	3.36138	-0.611773	0.540688	NA	2.13447	2.70002	2.22277	0	2	3	2	0	2610012C04Rik	TEC	chr1	1023
ENSMUSG00000107909.1	2.63146	-0.417424	2.55524	-0.16336	0.870235	NA	2.13447	3.60002	1.11139	3.67995	2	4	1	4	2610017A05Rik	TEC	chr6	1661
ENSMUSG00000097537.2	17.6105	0.322206	1.03208	0.31219	0.754896	NA	16.0086	15.3001	18.8936	20.2397	15	17	17	22	2610020C07Rik	antisense	chr16	3577
ENSMUSG00000091474.2	249.575	0.32006	0.324378	0.986687	0.323796	0.999934	193.17	251.101	305.631	248.397	181	279	275	270	2610021A01Rik	protein_coding	chr7	4857
ENSMUSG00000084362.1	36.7412	0.361805	0.728015	0.496975	0.619207	0.999934	26.6809	37.8002	35.5643	46.9194	25	42	32	51	2610024D14Rik	processed_pseudogene	chr11	294
ENSMUSG00000110997.1	31.2028	-0.0998215	0.786698	-0.126887	0.89903	0.999934	26.6809	37.8002	24.4505	35.8795	25	42	22	39	2610028D06Rik	TEC	chr9	1713
ENSMUSG00000087259.7	377.088	0.12713	0.278625	0.456277	0.648191	0.999934	424.76	301.502	374.537	407.555	398	335	337	443	2610035D17Rik	lincRNA	chr11	2121
ENSMUSG00000097536.2	144.176	0.447585	0.386946	1.15671	0.24739	0.999934	120.598	123.301	158.928	173.878	113	137	143	189	2610037D02Rik	lincRNA	chr15	5020
ENSMUSG00000079388.9	0.225001	-1.24388	4.96736	-0.250411	0.802269	NA	0	0.900005	0	0	0	1	0	0	2610042L04Rik	protein_coding	chr14	1886
ENSMUSG00000071302.10	233.208	0.285886	0.315086	0.907327	0.364234	0.999934	207.044	213.301	256.73	255.757	194	237	231	278	2610044O15Rik8	protein_coding	chr8	3859
ENSMUSG00000079671.8	1.66362	-2.65476	3.43672	-0.772469	0.439836	NA	2.13447	3.60002	0	0.919988	2	4	0	1	2610203C22Rik	processed_transcript	chr1	4910
ENSMUSG00000085236.3	3.64215	0.323204	2.17773	0.148413	0.882017	NA	2.13447	4.50003	3.33416	4.59994	2	5	3	5	2610206C17Rik	antisense	chr7	1917
ENSMUSG00000059482.15	95.5432	-0.351316	0.469606	-0.748109	0.454394	0.999934	101.388	111.601	68.9059	100.279	95	124	62	109	2610301B20Rik	protein_coding	chr4	2391
ENSMUSG00000100164.1	32.4613	0.359998	0.771277	0.466755	0.640675	0.999934	28.8154	27.9002	40.0099	33.1196	27	31	36	36	2610306M01Rik	bidirectional_promoter_lncRNA	chr6	1042
ENSMUSG00000108614.1	23.2022	-1.02855	0.918735	-1.11953	0.262913	NA	22.412	40.5002	13.3366	16.5598	21	45	12	18	2610306O10Rik	TEC	chr7	612
ENSMUSG00000085936.7	0.266809	-1.24165	4.96683	-0.249988	0.802597	NA	1.06724	0	0	0	1	0	0	0	2610307P16Rik	processed_transcript	chr13	3293
ENSMUSG00000114532.1	0.502848	0.045031	4.99583	0.00901372	0.992808	NA	0	0.900005	1.11139	0	0	1	1	0	2610318M16Rik	antisense	chr14	578
ENSMUSG00000049916.12	41.1837	0.226234	0.698646	0.323818	0.746076	0.999934	43.7567	32.4002	38.8985	49.6793	41	36	35	54	2610318N02Rik	protein_coding	chr16	2277
ENSMUSG00000010277.7	6666.13	-0.0535741	0.14414	-0.371681	0.71013	0.999934	6845.26	6734.74	6503.83	6580.67	6414	7483	5852	7153	2610507B11Rik	protein_coding	chr11	8798
ENSMUSG00000085882.1	61.2525	0.0869571	0.57146	0.152167	0.879056	0.999934	65.1015	54.0003	63.349	62.5592	61	60	57	68	2610507I01Rik	processed_transcript	chr11	1360
ENSMUSG00000092486.1	25.5799	-0.0791301	0.868245	-0.091138	0.927383	NA	26.6809	25.2001	31.1188	19.3197	25	28	28	21	2610524H06Rik	protein_coding	chr5	947
ENSMUSG00000096001.2	3016.92	-0.381755	0.159378	-2.39528	0.0166075	0.509974	3240.13	3590.12	2670.66	2566.77	3036	3989	2403	2790	2610528A11Rik	protein_coding	chr14	828
ENSMUSG00000028536.12	615.103	0.194555	0.224552	0.866415	0.386263	0.999934	610.46	538.203	640.158	671.591	572	598	576	730	2610528J11Rik	protein_coding	chr4	1202
ENSMUSG00000097334.1	4.61893	1.77883	2.063	0.862253	0.388548	NA	3.20171	0.900005	3.33416	11.0399	3	1	3	12	2700012I20Rik	lincRNA	chr9	684
ENSMUSG00000097731.1	5.68956	2.121	1.86021	1.1402	0.254205	NA	1.06724	3.60002	8.89109	9.19988	1	4	8	10	2700016F22Rik	lincRNA	chr4	3605
ENSMUSG00000106691.1	33.6604	-0.608151	0.779088	-0.780593	0.435042	0.999934	48.0257	33.3002	21.1163	32.1996	45	37	19	35	2700029L08Rik	TEC	chr5	1465
ENSMUSG00000086328.1	0.229997	1.33177	4.96683	0.268132	0.788597	NA	0	0	0	0.919988	0	0	0	1	2700033N17Rik	lincRNA	chr2	721
ENSMUSG00000097180.5	24.3533	0.296394	0.886171	0.334467	0.738028	NA	20.2775	23.4001	28.896	24.8397	19	26	26	27	2700038G22Rik	lincRNA	chr5	1594
ENSMUSG00000097787.1	29.537	0.371929	0.807003	0.460878	0.644886	0.999934	30.9499	20.7001	38.8985	27.5996	29	23	35	30	2700046G09Rik	lincRNA	chr19	1641
ENSMUSG00000034601.17	316.055	-0.0658963	0.289939	-0.227277	0.820209	0.999934	331.911	312.302	266.733	353.275	311	347	240	384	2700049A03Rik	protein_coding	chr12	5879
ENSMUSG00000024273.7	127.088	0.0725863	0.409077	0.177439	0.859164	0.999934	137.674	110.701	136.7	123.278	129	123	123	134	2700062C07Rik	protein_coding	chr18	1040
ENSMUSG00000086172.1	2.4593	0.554543	2.60268	0.213066	0.831275	NA	2.13447	1.80001	2.22277	3.67995	2	2	2	4	2700068H02Rik	antisense	chr4	1872
ENSMUSG00000053080.10	58.0608	-0.725502	0.587033	-1.23588	0.216503	0.999934	73.6394	71.1004	43.344	44.1594	69	79	39	48	2700081O15Rik	protein_coding	chr19	7032
ENSMUSG00000100119.1	0.225001	-1.24388	4.96736	-0.250411	0.802269	NA	0	0.900005	0	0	0	1	0	0	2700089I24Rik	lincRNA	chr19	1827
ENSMUSG00000062198.5	157.371	0.146951	0.371803	0.395239	0.692666	0.999934	143.01	155.701	157.817	172.958	134	173	142	188	2700097O09Rik	protein_coding	chr12	5021
ENSMUSG00000098090.7	84.1414	-0.498275	0.495005	-1.00661	0.314125	0.999934	114.194	83.7005	73.3515	65.3191	107	93	66	71	2700099C18Rik	transcribed_unprocessed_pseudogene	chr17	2181
ENSMUSG00000087497.7	83.2065	0.174812	0.49469	0.353376	0.723806	0.999934	85.379	71.1004	94.4678	81.8789	80	79	85	89	2810001G20Rik	antisense	chr11	1057
ENSMUSG00000045464.5	51.4203	0.771251	0.623457	1.23706	0.216066	0.999934	33.0844	43.2002	62.2376	67.1591	31	48	56	73	2810002D19Rik	processed_transcript	chr2	2040
ENSMUSG00000031984.8	469.763	0.337524	0.241824	1.39574	0.162791	0.999934	429.029	401.402	527.908	520.713	402	446	475	566	2810004N23Rik	protein_coding	chr8	6324
ENSMUSG00000047635.6	95.498	0.455291	0.464859	0.979416	0.327374	0.999934	86.4462	74.7004	117.807	103.039	81	83	106	112	2810006K23Rik	protein_coding	chr5	2873
ENSMUSG00000099881.1	305.944	0.308534	0.288479	1.06952	0.284836	0.999934	318.037	232.201	347.864	325.676	298	258	313	354	2810013P06Rik	bidirectional_promoter_lncRNA	chr8	2137
ENSMUSG00000020491.15	132.055	-0.227109	0.409067	-0.555188	0.578766	0.999934	129.136	155.701	131.144	112.239	121	173	118	122	2810021J22Rik	protein_coding	chr11	3928
ENSMUSG00000049881.13	92.7051	-0.226345	0.481345	-0.470234	0.638188	0.999934	108.858	90.9005	74.4628	96.5987	102	101	67	105	2810025M15Rik	transcribed_processed_pseudogene	chr1	1410
ENSMUSG00000096995.2	3.82042	0.956399	2.18673	0.437365	0.661846	NA	5.33619	0.900005	4.44554	4.59994	5	1	4	5	2810029C07Rik	bidirectional_promoter_lncRNA	chr12	1954
ENSMUSG00000099338.1	93.834	0.096554	0.468964	0.205888	0.836878	0.999934	88.5807	92.7005	101.136	92.9188	83	103	91	101	2810030D12Rik	bidirectional_promoter_lncRNA	chr8	1422
ENSMUSG00000099034.7	10.7898	-0.387351	1.30638	-0.296506	0.766843	NA	11.7396	12.6001	7.7797	11.0399	11	14	7	12	2810039B14Rik	transcribed_unitary_pseudogene	chr15	6418
ENSMUSG00000099966.1	100.538	-0.0254235	0.45443	-0.0559459	0.955385	0.999934	115.262	88.2005	106.693	91.9988	108	98	96	100	2810402E24Rik	antisense	chr14	3040
ENSMUSG00000086629.8	90.9297	0.542593	0.476532	1.13863	0.254858	0.999934	78.9756	69.3004	107.804	107.639	74	77	97	117	2810403D21Rik	processed_transcript	chrX	8345
ENSMUSG00000085329.1	13.4208	-1.4999	1.21117	-1.23839	0.215573	NA	24.5465	15.3001	5.55693	8.27989	23	17	5	9	2810404F17Rik	lincRNA	chr16	1704
ENSMUSG00000101493.1	19.2069	-0.0688388	1.05541	-0.0652249	0.947995	NA	29.8826	10.8001	12.2252	23.9197	28	12	11	26	2810405F17Rik	lincRNA	chr4	1117
ENSMUSG00000055972.5	0.988617	-1.80108	4.28776	-0.420052	0.674448	NA	2.13447	0.900005	0	0.919988	2	1	0	1	2810407A14Rik	lincRNA	chr16	3771
ENSMUSG00000018570.17	80.7602	-0.477314	0.503968	-0.94711	0.343583	0.999934	106.724	81.9005	70.0173	64.3992	100	91	63	70	2810408A11Rik	protein_coding	chr11	2368
ENSMUSG00000087213.2	18.4079	-0.105922	1.03586	-0.102255	0.918554	NA	12.8068	26.1001	20.0049	14.7198	12	29	18	16	2810408I11Rik	processed_transcript	chr1	2341
ENSMUSG00000075389.3	73.2162	1.11186	0.530529	2.09575	0.036104	0.746264	44.824	47.7003	105.582	94.7588	42	53	95	103	2810410L24Rik	processed_transcript	chr11	3028
ENSMUSG00000100594.1	14.2457	0.738597	1.15639	0.63871	0.523012	NA	10.6724	9.90006	24.4505	11.9598	10	11	22	13	2810414N06Rik	lincRNA	chr1	1381
ENSMUSG00000097811.1	0.822502	0.571405	4.8531	0.11774	0.906274	NA	1.06724	0	2.22277	0	1	0	2	0	2810425M01Rik	lincRNA	chr10	1850
ENSMUSG00000105981.1	25.9816	0.298607	0.876556	0.34066	0.73336	NA	21.3447	23.4001	17.7822	41.3995	20	26	16	45	2810428J06Rik	TEC	chr3	2696
ENSMUSG00000097709.8	11.2217	-0.708098	1.32416	-0.534753	0.592821	NA	14.9413	11.7001	4.44554	13.7998	14	13	4	15	2810429I04Rik	lincRNA	chr13	8789
ENSMUSG00000090260.1	4.22861	0.206982	2.01837	0.102549	0.918321	NA	4.26895	3.60002	4.44554	4.59994	4	4	4	5	2810442N19Rik	antisense	chr1	928
ENSMUSG00000100876.1	22.9146	0.36979	0.931447	0.397005	0.691363	NA	13.8741	27.0002	27.7846	22.9997	13	30	25	25	2810454H06Rik	antisense	chr6	3148
ENSMUSG00000085030.1	7.42181	0.291102	1.56018	0.186583	0.851988	NA	5.33619	8.10005	8.89109	7.3599	5	9	8	8	2810455O05Rik	lincRNA	chr8	1691
ENSMUSG00000026227.11	613.279	0.238008	0.222103	1.07161	0.283893	0.999934	544.291	581.403	672.388	655.031	510	646	605	712	2810459M11Rik	protein_coding	chr1	3331
ENSMUSG00000091475.2	0.229997	1.33177	4.96683	0.268132	0.788597	NA	0	0	0	0.919988	0	0	0	1	2810468N07Rik	processed_transcript	chr17	1349
ENSMUSG00000103004.1	1.25543	-2.15379	3.90664	-0.551316	0.581417	NA	3.20171	0.900005	0	0.919988	3	1	0	1	2900002M20Rik	TEC	chr1	330
ENSMUSG00000043833.6	47.2218	1.32812	0.656715	2.02237	0.0431379	0.822641	25.6137	27.9002	75.5742	59.7992	24	31	68	65	2900005J15Rik	processed_transcript	chr5	2928
ENSMUSG00000102014.1	1.21861	-1.37896	3.92692	-0.351156	0.725471	NA	2.13447	0.900005	0	1.83998	2	1	0	2	2900009J06Rik	antisense	chr1	503
ENSMUSG00000044117.12	0.68	-0.481265	4.8531	-0.0991665	0.921006	NA	0	1.80001	0	0.919988	0	2	0	1	2900011O08Rik	protein_coding	chr16	2395
ENSMUSG00000102386.1	0.999654	0.0450804	3.90966	0.0115305	0.9908	NA	1.06724	0.900005	1.11139	0.919988	1	1	1	1	2900022M07Rik	TEC	chr1	1017
ENSMUSG00000051339.10	6126.73	0.417143	0.149053	2.79863	0.00513196	0.263929	5155.82	5329.83	7391.83	6629.43	4831	5922	6651	7206	2900026A02Rik	protein_coding	chr5	10814
ENSMUSG00000103776.1	3.5557	-0.244807	2.27973	-0.107384	0.914484	NA	2.13447	4.50003	6.66831	0.919988	2	5	6	1	2900035J10Rik	TEC	chr1	532
ENSMUSG00000054418.6	0.454998	0.0444687	4.88765	0.00909818	0.992741	NA	0	0.900005	0	0.919988	0	1	0	1	2900041M22Rik	processed_transcript	chr11	1784
ENSMUSG00000111938.1	0.533619	-1.8095	4.93228	-0.366869	0.713717	NA	2.13447	0	0	0	2	0	0	0	2900045O20Rik	lincRNA	chr12	1292
ENSMUSG00000043993.6	60.5572	1.30474	0.580084	2.24923	0.0244981	0.620108	37.3533	32.4002	93.3564	79.119	35	36	84	86	2900052L18Rik	processed_transcript	chr11	1588
ENSMUSG00000107722.1	3.61533	1.53637	2.24903	0.683125	0.494528	NA	1.06724	2.70002	3.33416	7.3599	1	3	3	8	2900060B14Rik	antisense	chr1	616
ENSMUSG00000113621.1	0.9568	0.909109	4.77362	0.190444	0.848961	NA	1.06724	0	0	2.75996	1	0	0	3	2900060N12Rik	bidirectional_promoter_lncRNA	chr12	4081
ENSMUSG00000105771.1	0.544656	0.0456629	4.88765	0.00934252	0.992546	NA	1.06724	0	1.11139	0	1	0	1	0	2900064K03Rik	TEC	chr5	3113
ENSMUSG00000097277.7	127.657	-0.0141801	0.415599	-0.0341196	0.972782	0.999934	134.472	121.501	111.139	143.518	126	135	100	156	2900076A07Rik	lincRNA	chr7	1993
ENSMUSG00000107015.1	1.76931	-0.440818	3.03002	-0.145484	0.884329	NA	2.13447	1.80001	2.22277	0.919988	2	2	2	1	2900076G11Rik	TEC	chr5	631
ENSMUSG00000111358.1	1.41784	1.51216	3.6546	0.413769	0.679043	NA	0	1.80001	1.11139	2.75996	0	2	1	3	2900078I11Rik	TEC	chr10	999
ENSMUSG00000087484.1	1.96749	1.5533	2.93982	0.528365	0.597246	NA	1.06724	0.900005	2.22277	3.67995	1	1	2	4	2900089D17Rik	antisense	chr5	2583
ENSMUSG00000104034.1	1.51354	1.8494	3.61339	0.511819	0.608778	NA	0	1.80001	3.33416	0.919988	0	2	3	1	2900092N22Rik	TEC	chr2	1409
ENSMUSG00000104419.1	0.277846	1.334	4.96736	0.268553	0.788274	NA	0	0	1.11139	0	0	0	1	0	2900092O11Rik	TEC	chr1	755
ENSMUSG00000099632.1	14.7785	-0.184543	1.12958	-0.163373	0.870225	NA	20.2775	11.7001	13.3366	13.7998	19	13	12	15	2900093K20Rik	antisense	chr2	567
ENSMUSG00000102869.2	3035.71	-0.0150799	0.157018	-0.0960393	0.923489	0.999934	3074.71	3026.72	2905.16	3136.24	2881	3363	2614	3409	2900097C17Rik	lincRNA	chr2	4915
ENSMUSG00000070282.6	21.9376	0.330204	0.929695	0.355174	0.722459	NA	18.143	20.7001	22.2277	26.6796	17	23	20	29	3000002C10Rik	transcribed_processed_pseudogene	chr9	3981
ENSMUSG00000084885.7	0.266809	-1.24165	4.96683	-0.249988	0.802597	NA	1.06724	0	0	0	1	0	0	0	3010001F23Rik	processed_transcript	chrX	1816
ENSMUSG00000085355.2	24.4838	-0.609715	0.891511	-0.683912	0.494031	NA	33.0844	26.1001	16.6708	22.0797	31	29	15	24	3010003L21Rik	antisense	chr6	1747
ENSMUSG00000086254.1	22.6375	-0.441831	1.03776	-0.425755	0.670286	NA	25.6137	18.9001	5.55693	40.4795	24	21	5	44	3100003L05Rik	lincRNA	chr7	664
ENSMUSG00000079737.4	154.839	0.495075	0.381101	1.29906	0.193922	0.999934	115.262	142.201	188.936	172.958	108	158	170	188	3110001I22Rik	protein_coding	chr16	1705
ENSMUSG00000114649.1	0.491811	-2.39757	4.89228	-0.490072	0.624083	NA	1.06724	0.900005	0	0	1	1	0	0	3110006O06Rik	lincRNA	chr13	4086
ENSMUSG00000026388.15	18.9217	0.493288	1.02487	0.481319	0.63029	NA	21.3447	10.8001	17.7822	25.7597	20	12	16	28	3110009E18Rik	protein_coding	chr1	2428
ENSMUSG00000113331.1	0.229997	1.33177	4.96683	0.268132	0.788597	NA	0	0	0	0.919988	0	0	0	1	3110009F21Rik	lincRNA	chr12	1625
ENSMUSG00000109163.1	0.459994	1.89962	4.93227	0.385141	0.700133	NA	0	0	0	1.83998	0	0	0	2	3110009M11Rik	processed_pseudogene	chr7	892
ENSMUSG00000114824.1	0.993613	0.0404242	4.68164	0.00863461	0.993111	NA	2.13447	0	0	1.83998	2	0	0	2	3110015C05Rik	lincRNA	chr13	940
ENSMUSG00000094958.1	6.31258	-0.0842679	1.67808	-0.0502168	0.95995	NA	7.47066	5.40003	7.7797	4.59994	7	6	7	5	3110021N24Rik	protein_coding	chr4	1812
ENSMUSG00000074415.14	1.20862	-3.69749	4.26686	-0.866558	0.386184	NA	2.13447	2.70002	0	0	2	3	0	0	3110039I08Rik	processed_transcript	chr9	23898
ENSMUSG00000025102.14	204.334	0.168466	0.333491	0.505158	0.613448	0.999934	191.035	193.501	226.723	206.077	179	215	204	224	3110040N11Rik	protein_coding	chr7	1231
ENSMUSG00000097503.2	15.138	0.0982912	1.11214	0.08838	0.929575	NA	12.8068	16.2001	12.2252	19.3197	12	18	11	21	3110045C21Rik	antisense	chr1	1135
ENSMUSG00000085642.8	5.96981	-0.489259	1.75299	-0.279099	0.780169	NA	9.60514	4.50003	3.33416	6.43992	9	5	3	7	3110053B16Rik	transcribed_unprocessed_pseudogene	chr12	2205
ENSMUSG00000085622.9	108.174	0.104678	0.439415	0.23822	0.81171	0.999934	107.791	100.801	110.027	114.079	101	112	99	124	3110056K07Rik	processed_transcript	chr12	3153
ENSMUSG00000103634.1	0.675004	-2.14938	4.91948	-0.436911	0.662176	NA	0	2.70002	0	0	0	3	0	0	3110062G12Rik	TEC	chr1	1419
ENSMUSG00000081187.1	5.50137	1.83171	1.83933	0.995853	0.319322	NA	2.13447	2.70002	8.89109	8.27989	2	3	8	9	3110067C02Rik	processed_pseudogene	chrX	2117
ENSMUSG00000074635.2	9.90609	1.05636	1.37491	0.768316	0.4423	NA	7.47066	5.40003	11.1139	15.6398	7	6	10	17	3110070M22Rik	protein_coding	chr13	1123
ENSMUSG00000103284.1	37.3607	-0.630854	0.722922	-0.872645	0.382857	0.999934	44.824	45.9003	31.1188	27.5996	42	51	28	30	3110080O07Rik	TEC	chr3	1021
ENSMUSG00000053553.11	78.8992	0.354838	0.510973	0.694437	0.487408	0.999934	76.8411	62.1004	85.5767	91.0788	72	69	77	99	3110082I17Rik	protein_coding	chr5	2885
ENSMUSG00000097303.2	0.277846	1.334	4.96736	0.268553	0.788274	NA	0	0	1.11139	0	0	0	1	0	3110083C13Rik	bidirectional_promoter_lncRNA	chr14	968
ENSMUSG00000085582.7	0.507843	2.4877	4.89227	0.508496	0.611106	NA	0	0	1.11139	0.919988	0	0	1	1	3110099E03Rik	lincRNA	chr2	2935
ENSMUSG00000073590.3	20.2572	0.87522	0.974618	0.898014	0.369178	NA	14.9413	13.5001	22.2277	30.3596	14	15	20	33	3222401L13Rik	lincRNA	chr18	6292
ENSMUSG00000033731.9	6.7336	0.197361	1.64162	0.120223	0.904306	NA	4.26895	8.10005	4.44554	10.1199	4	9	4	11	3300002A11Rik	antisense	chr12	726
ENSMUSG00000063364.10	33.613	0.497059	0.759908	0.654104	0.513045	0.999934	27.7482	27.9002	35.5643	43.2394	26	31	32	47	3300002I08Rik	protein_coding	chr2	2117
ENSMUSG00000107585.1	0.533619	-1.8095	4.93228	-0.366869	0.713717	NA	2.13447	0	0	0	2	0	0	0	3300002P13Rik	lincRNA	chr7	1092
ENSMUSG00000096965.7	0.769657	-1.21863	4.77276	-0.255331	0.798468	NA	1.06724	0.900005	1.11139	0	1	1	1	0	3300005D01Rik	lincRNA	chr17	1380
ENSMUSG00000071540.4	7.17473	-0.0648988	1.57777	-0.0411331	0.96719	NA	7.47066	7.20004	6.66831	7.3599	7	8	6	8	3425401B19Rik	protein_coding	chr14	5572
ENSMUSG00000113009.1	0.496806	0.0450723	4.9968	0.00902022	0.992803	NA	1.06724	0	0	0.919988	1	0	0	1	3732407C23Rik	TEC	chr12	3540
ENSMUSG00000031125.2	9.27719	-1.07366	1.67267	-0.641886	0.520947	NA	4.26895	12.6001	0	20.2397	4	14	0	22	3830403N18Rik	protein_coding	chrX	1022
ENSMUSG00000033111.16	368.405	0.0984402	0.267021	0.368661	0.71238	0.999934	361.793	349.202	352.309	410.315	339	388	317	446	3830406C13Rik	protein_coding	chr14	4621
ENSMUSG00000071181.2	10.0026	0.0450832	1.35263	0.0333301	0.973411	NA	9.60514	9.90006	12.2252	8.27989	9	11	11	9	3830408C21Rik	processed_transcript	chr13	4846
ENSMUSG00000038917.4	35.6718	-0.549111	0.746448	-0.735632	0.461955	0.999934	48.0257	36.9002	25.5619	32.1996	45	41	23	35	3930402G23Rik	lincRNA	chr8	3323
ENSMUSG00000064202.15	10.9226	0.309941	1.29499	0.239338	0.810844	NA	9.60514	9.90006	12.2252	11.9598	9	11	11	13	4430402I18Rik	protein_coding	chr19	5420
ENSMUSG00000075027.10	1.42783	3.75802	4.00042	0.939407	0.347522	NA	0	0	1.11139	4.59994	0	0	1	5	4631405J19Rik	antisense	chr2	3554
ENSMUSG00000097850.2	21.2049	0.484632	0.957695	0.50604	0.612828	NA	22.412	13.5001	22.2277	26.6796	21	15	20	29	4631405K08Rik	lincRNA	chr1	2112
ENSMUSG00000114655.1	0.229997	1.33177	4.96683	0.268132	0.788597	NA	0	0	0	0.919988	0	0	0	1	4631422I05Rik	TEC	chr13	1763
ENSMUSG00000042579.2	156.194	0.357799	0.373729	0.957375	0.338378	0.999934	133.405	140.401	178.933	172.038	125	156	161	187	4632404H12Rik	lincRNA	chr3	5730
ENSMUSG00000097561.1	15.844	0.392708	1.09092	0.359978	0.718863	NA	11.7396	15.3001	13.3366	22.9997	11	17	12	25	4632411P08Rik	lincRNA	chr5	3237
ENSMUSG00000048106.5	198.312	0.0611811	0.344408	0.177641	0.859005	0.999934	189.968	196.201	232.28	174.798	178	218	209	190	4632415L05Rik	lincRNA	chr3	4099
ENSMUSG00000111605.1	65.9244	-0.107573	0.553127	-0.194482	0.845799	0.999934	66.1687	70.2004	55.5693	71.7591	62	78	50	78	4632418H02Rik	TEC	chr9	2721
ENSMUSG00000074024.5	689.636	0.476271	0.213395	2.23188	0.0256229	0.632521	566.703	586.803	777.97	827.069	531	652	700	899	4632427E13Rik	bidirectional_promoter_lncRNA	chr7	7303
ENSMUSG00000097184.2	42.1795	1.17368	0.688622	1.70439	0.0883083	0.999934	24.5465	27.0002	50.0124	67.1591	23	30	45	73	4632428C04Rik	lincRNA	chr16	2428
ENSMUSG00000105597.1	62.4511	-0.830413	0.569412	-1.45837	0.144739	0.999934	66.1687	93.6005	36.6757	53.3593	62	104	33	58	4633401B06Rik	TEC	chr3	1073
ENSMUSG00000097004.1	7.94069	0.688039	1.52546	0.451037	0.651963	NA	4.26895	8.10005	11.1139	8.27989	4	9	10	9	4731419I09Rik	antisense	chr3	2820
ENSMUSG00000107402.1	52.4853	0.315153	0.615341	0.51216	0.608539	0.999934	44.824	48.6003	62.2376	54.2793	42	54	56	59	4732416N19Rik	TEC	chr6	3479
ENSMUSG00000097203.2	4.27172	2.32591	2.11961	1.09733	0.272497	NA	1.06724	1.80001	7.7797	6.43992	1	2	7	7	4732419C18Rik	lincRNA	chr8	3536
ENSMUSG00000090031.2	136.459	0.46774	0.404116	1.15744	0.247093	0.999934	97.1186	133.201	160.04	155.478	91	148	144	169	4732440D04Rik	antisense	chr1	5428
ENSMUSG00000097762.1	0.266809	-1.24165	4.96683	-0.249988	0.802597	NA	1.06724	0	0	0	1	0	0	0	4732463B04Rik	antisense	chr12	2932
ENSMUSG00000101517.6	269.03	0.651129	0.300667	2.16561	0.0303408	0.692284	209.179	208.801	301.186	356.955	196	232	271	388	4732465J04Rik	lincRNA	chr10	3302
ENSMUSG00000053714.8	183.286	1.01133	0.350705	2.88372	0.00393014	0.219546	145.144	98.1006	291.183	198.717	136	109	262	216	4732471J01Rik	antisense	chr7	4332
ENSMUSG00000085421.1	27.8025	-0.30672	0.83097	-0.369111	0.712045	0.999934	29.8826	31.5002	22.2277	27.5996	28	35	20	30	4732490B19Rik	lincRNA	chr11	2446
ENSMUSG00000097350.2	33.104	0.641035	0.766468	0.83635	0.402958	0.999934	28.8154	22.5001	48.901	32.1996	27	25	44	35	4732491K20Rik	bidirectional_promoter_lncRNA	chr17	3174
ENSMUSG00000108456.1	2.87249	0.675244	2.46612	0.273809	0.784232	NA	1.06724	3.60002	2.22277	4.59994	1	4	2	5	4732496C06Rik	lincRNA	chr7	2500
ENSMUSG00000097236.1	16.6575	0.873562	1.08409	0.805799	0.420359	NA	9.60514	12.6001	12.2252	32.1996	9	14	11	35	4831440E17Rik	lincRNA	chr5	1028
ENSMUSG00000107481.1	1.19284	2.04081	3.95034	0.516616	0.605424	NA	0	0.900005	1.11139	2.75996	0	1	1	3	4833403J16Rik	lincRNA	chr6	1031
ENSMUSG00000108807.1	0.68	-0.481265	4.8531	-0.0991665	0.921006	NA	0	1.80001	0	0.919988	0	2	0	1	4833404L02Rik	TEC	chr7	908
ENSMUSG00000097779.1	129.973	0.642678	0.415198	1.54788	0.121651	0.999934	128.068	78.3004	164.485	149.038	120	87	148	162	4833407H14Rik	lincRNA	chr19	1485
ENSMUSG00000109089.1	0.229997	1.33177	4.96683	0.268132	0.788597	NA	0	0	0	0.919988	0	0	0	1	4833411C07Rik	processed_transcript	chr8	2257
ENSMUSG00000116298.1	21.7957	-0.429413	0.933905	-0.459804	0.645657	NA	26.6809	23.4001	17.7822	19.3197	25	26	16	21	4833412C15Rik	TEC	chr15	2071
ENSMUSG00000104018.1	24.3351	0.118591	0.901265	0.131583	0.895314	NA	14.9413	33.3002	23.3391	25.7597	14	37	21	28	4833412K13Rik	TEC	chr1	1479
ENSMUSG00000013562.12	1.33035	2.03922	3.78479	0.538795	0.590028	NA	1.06724	0	3.33416	0.919988	1	0	3	1	4833413E03Rik	lincRNA	chr17	1373
ENSMUSG00000104950.1	48.6456	-0.746728	0.647493	-1.15326	0.248803	0.999934	58.698	62.1004	27.7846	45.9994	55	69	25	50	4833413G10Rik	antisense	chr5	1946
ENSMUSG00000115936.1	0.684995	0.570179	4.85336	0.117481	0.906479	NA	0	0.900005	0	1.83998	0	1	0	2	4833415N18Rik	lincRNA	chr16	1168
ENSMUSG00000086015.1	6.5993	0.239327	1.65017	0.145032	0.884685	NA	4.26895	8.10005	6.66831	7.3599	4	9	6	8	4833417C18Rik	processed_transcript	chr11	1269
ENSMUSG00000085287.8	90.4108	0.105833	0.479832	0.220563	0.825433	0.999934	103.522	72.0004	97.802	88.3188	97	80	88	96	4833418N02Rik	lincRNA	chr17	2762
ENSMUSG00000062822.8	846.301	-0.190807	0.203582	-0.93725	0.34863	0.999934	948.774	856.805	774.636	804.989	889	952	697	875	4833420G17Rik	protein_coding	chr13	4882
ENSMUSG00000103996.1	8.67119	-0.0576284	1.4451	-0.0398786	0.96819	NA	9.60514	8.10005	7.7797	9.19988	9	9	7	10	4833421G17Rik	TEC	chr1	844
ENSMUSG00000074782.3	0.229997	1.33177	4.96683	0.268132	0.788597	NA	0	0	0	0.919988	0	0	0	1	4833422C13Rik	antisense	chr13	5915
ENSMUSG00000097619.8	0.946809	-1.66636	4.35035	-0.383041	0.701689	NA	1.06724	1.80001	0	0.919988	1	2	0	1	4833422M21Rik	processed_transcript	chr15	5720
ENSMUSG00000075217.1	1.49146	-0.954904	3.28374	-0.290797	0.771206	NA	2.13447	1.80001	1.11139	0.919988	2	2	1	1	4833423E24Rik	protein_coding	chr2	2272
ENSMUSG00000032057.9	0.496806	0.0450723	4.9968	0.00902022	0.992803	NA	1.06724	0	0	0.919988	1	0	0	1	4833427G06Rik	protein_coding	chr9	973
ENSMUSG00000025871.18	2736.9	-0.116805	0.157813	-0.74015	0.459209	0.999934	2911.42	2784.62	2635.1	2616.45	2728	3094	2371	2844	4833439L19Rik	protein_coding	chr13	3187
ENSMUSG00000103103.1	78.0737	0.285054	0.539242	0.528621	0.597069	0.999934	78.9756	60.3003	64.4604	108.559	74	67	58	118	4833445I07Rik	lincRNA	chr9	1642
ENSMUSG00000111916.1	0.229997	1.33177	4.96683	0.268132	0.788597	NA	0	0	0	0.919988	0	0	0	1	4921501I09Rik	antisense	chr12	384
ENSMUSG00000029828.4	14.508	0.244585	1.13166	0.216129	0.828887	NA	14.9413	11.7001	16.6708	14.7198	14	13	15	16	4921507P07Rik	protein_coding	chr6	2378
ENSMUSG00000052376.2	0.983621	-3.39754	4.6633	-0.72857	0.466265	NA	2.13447	1.80001	0	0	2	2	0	0	4921508M14Rik	TEC	chr12	1099
ENSMUSG00000108788.1	0.277846	1.334	4.96736	0.268553	0.788274	NA	0	0	1.11139	0	0	0	1	0	4921513I08Rik	antisense	chr7	866
ENSMUSG00000097620.7	0.555693	1.90274	4.93253	0.385753	0.69968	NA	0	0	2.22277	0	0	0	2	0	4921514A10Rik	antisense	chr4	2116
ENSMUSG00000098150.2	0.229997	1.33177	4.96683	0.268132	0.788597	NA	0	0	0	0.919988	0	0	0	1	4921515E04Rik	processed_transcript	chr15	2885
ENSMUSG00000112652.1	1.72146	-0.441893	3.06174	-0.144328	0.885242	NA	2.13447	1.80001	1.11139	1.83998	2	2	1	2	4921516A02Rik	antisense	chr10	4560
ENSMUSG00000049902.6	0.277846	1.334	4.96736	0.268553	0.788274	NA	0	0	1.11139	0	0	0	1	0	4921517D22Rik	protein_coding	chr13	3149
ENSMUSG00000085851.1	0.544656	0.0456629	4.88765	0.00934252	0.992546	NA	1.06724	0	1.11139	0	1	0	1	0	4921518K17Rik	antisense	chr12	3390
ENSMUSG00000040467.1	0.502848	0.045031	4.99583	0.00901372	0.992808	NA	0	0.900005	1.11139	0	0	1	1	0	4921522P10Rik	lincRNA	chr8	2101
ENSMUSG00000036934.9	128.463	0.0437174	0.410888	0.106397	0.915267	0.999934	113.127	140.401	133.366	126.958	106	156	120	138	4921524J17Rik	protein_coding	chr8	1679
ENSMUSG00000113211.1	2.28086	-3.07692	3.10472	-0.991047	0.321663	NA	6.40342	1.80001	0	0.919988	6	2	0	1	4921525O09Rik	processed_transcript	chr13	3747
ENSMUSG00000064299.6	0.266809	-1.24165	4.96683	-0.249988	0.802597	NA	1.06724	0	0	0	1	0	0	0	4921528I07Rik	processed_transcript	chr9	3954
ENSMUSG00000108060.2	0.983621	-3.39754	4.6633	-0.72857	0.466265	NA	2.13447	1.80001	0	0	2	2	0	0	4921529L05Rik	processed_transcript	chr6	2720
ENSMUSG00000085704.1	79.9429	0.436859	0.507161	0.861381	0.389028	0.999934	69.3704	65.7004	105.582	79.119	65	73	95	86	4921531C22Rik	processed_transcript	chr2	1967
ENSMUSG00000110910.1	2.69429	1.32726	2.55791	0.518883	0.603842	NA	2.13447	0.900005	2.22277	5.51993	2	1	2	6	4921534A09Rik	TEC	chr9	2495
ENSMUSG00000020434.4	27.6671	0.0902438	0.858506	0.105117	0.916283	0.999934	28.8154	23.4001	18.8936	39.5595	27	26	17	43	4921536K21Rik	protein_coding	chr11	2590
ENSMUSG00000028520.12	0.993613	0.0404242	4.68164	0.00863461	0.993111	NA	2.13447	0	0	1.83998	2	0	0	2	4921539E11Rik	protein_coding	chr4	2754
ENSMUSG00000047720.7	0.962842	1.75654	4.32196	0.406422	0.684433	NA	0	0.900005	1.11139	1.83998	0	1	1	2	4922502D21Rik	protein_coding	chr6	1809
ENSMUSG00000086352.1	0.229997	1.33177	4.96683	0.268132	0.788597	NA	0	0	0	0.919988	0	0	0	1	4930401G09Rik	lincRNA	chr5	637
ENSMUSG00000085528.1	0.229997	1.33177	4.96683	0.268132	0.788597	NA	0	0	0	0.919988	0	0	0	1	4930401O10Rik	lincRNA	chr11	787
ENSMUSG00000027309.18	263.903	-0.500448	0.319038	-1.56862	0.116737	0.999934	303.095	308.702	167.819	275.996	284	343	151	300	4930402H24Rik	protein_coding	chr2	10659
ENSMUSG00000045797.1	0.266809	-1.24165	4.96683	-0.249988	0.802597	NA	1.06724	0	0	0	1	0	0	0	4930402K13Rik	protein_coding	chrX	1781
ENSMUSG00000106082.4	0.507843	2.4877	4.89227	0.508496	0.611106	NA	0	0	1.11139	0.919988	0	0	1	1	4930404A12Rik	antisense	chr5	727
ENSMUSG00000113630.1	0.454998	0.0444687	4.88765	0.00909818	0.992741	NA	0	0.900005	0	0.919988	0	1	0	1	4930404H11Rik	lincRNA	chr12	1421
ENSMUSG00000087354.1	0.496806	0.0450723	4.9968	0.00902022	0.992803	NA	1.06724	0	0	0.919988	1	0	0	1	4930404I05Rik	processed_transcript	chr16	2746
ENSMUSG00000020234.10	58.1935	0.417207	0.584599	0.713664	0.475435	0.999934	50.1602	49.5003	67.7945	65.3191	47	55	61	71	4930404N11Rik	protein_coding	chr10	1751
ENSMUSG00000114412.1	0.266809	-1.24165	4.96683	-0.249988	0.802597	NA	1.06724	0	0	0	1	0	0	0	4930405A10Rik	antisense	chr14	1568
ENSMUSG00000086638.7	6.68317	1.54678	1.66419	0.929448	0.352657	NA	3.20171	3.60002	8.89109	11.0399	3	4	8	12	4930405A21Rik	processed_transcript	chr2	1137
ENSMUSG00000110754.1	4.46965	0.704655	1.97407	0.356956	0.721125	NA	3.20171	3.60002	5.55693	5.51993	3	4	5	6	4930405J17Rik	antisense	chr10	620
ENSMUSG00000104705.1	1.8618	-0.879926	3.26854	-0.269211	0.787768	NA	1.06724	2.70002	0	3.67995	1	3	0	4	4930405N21Rik	TEC	chr5	1200
ENSMUSG00000090565.7	45.9644	0.108776	0.653539	0.166442	0.867809	0.999934	45.8912	42.3002	53.3465	42.3194	43	47	48	46	4930405O22Rik	sense_intronic	chr17	1012
ENSMUSG00000021101.2	2.37181	1.89266	2.95037	0.6415	0.521198	NA	3.20171	0	4.44554	1.83998	3	0	4	2	4930408O17Rik	lincRNA	chr12	1299
ENSMUSG00000085558.7	11.4635	0.869381	1.28223	0.678021	0.497758	NA	6.40342	9.90006	16.6708	12.8798	6	11	15	14	4930412C18Rik	processed_transcript	chr4	6148
ENSMUSG00000110289.1	169.683	-0.0391407	0.360546	-0.10856	0.913552	0.999934	172.892	171.001	160.04	174.798	162	190	144	190	4930412F12Rik	TEC	chr8	1471
ENSMUSG00000051008.5	2.09396	1.72882	3.11339	0.555287	0.578698	NA	3.20171	0	3.33416	1.83998	3	0	3	2	4930412M03Rik	lincRNA	chr11	1111
ENSMUSG00000115526.1	0.774653	1.30561	4.75965	0.274308	0.783848	NA	1.06724	0	1.11139	0.919988	1	0	1	1	4930413F20Rik	antisense	chr15	1096
ENSMUSG00000108452.1	0.450003	-1.81261	4.93254	-0.367481	0.71326	NA	0	1.80001	0	0	0	2	0	0	4930413G21Rik	TEC	chr7	993
ENSMUSG00000022993.7	24.518	-0.251694	0.899669	-0.279763	0.77966	NA	17.0758	37.8002	21.1163	22.0797	16	42	19	24	4930415O20Rik	protein_coding	chr15	558
ENSMUSG00000087017.7	43.2164	-0.293345	0.673171	-0.435766	0.663006	0.999934	51.2274	44.1002	38.8985	38.6395	48	49	35	42	4930417H01Rik	processed_transcript	chr2	1887
ENSMUSG00000108129.2	2.33283	1.67439	2.97644	0.562549	0.573742	NA	0	2.70002	1.11139	5.51993	0	3	1	6	4930417O13Rik	processed_transcript	chr6	4445
ENSMUSG00000106851.1	0.689991	2.23599	4.9193	0.454534	0.649445	NA	0	0	0	2.75996	0	0	0	3	4930421C12Rik	TEC	chr5	1574
ENSMUSG00000113303.1	6.1361	-0.141581	1.74961	-0.0809213	0.935505	NA	3.20171	9.00005	2.22277	10.1199	3	10	2	11	4930423D22Rik	bidirectional_promoter_lncRNA	chr12	1674
ENSMUSG00000112753.1	0.229997	1.33177	4.96683	0.268132	0.788597	NA	0	0	0	0.919988	0	0	0	1	4930423D24Rik	lincRNA	chr10	689
ENSMUSG00000113605.1	0.277846	1.334	4.96736	0.268553	0.788274	NA	0	0	1.11139	0	0	0	1	0	4930425K24Rik	TEC	chr12	2143
ENSMUSG00000043168.12	1.25543	-2.15379	3.90664	-0.551316	0.581417	NA	3.20171	0.900005	0	0.919988	3	1	0	1	4930426D05Rik	antisense	chr18	3001
ENSMUSG00000097323.2	1.2825	2.28629	3.83304	0.59647	0.550862	NA	1.06724	0	2.22277	1.83998	1	0	2	2	4930426I24Rik	lincRNA	chr12	1232
ENSMUSG00000089887.2	0.774653	1.30561	4.75965	0.274308	0.783848	NA	1.06724	0	1.11139	0.919988	1	0	1	1	4930428N03Rik	lincRNA	chr14	4882
ENSMUSG00000106333.1	1.69069	1.53744	3.40969	0.450903	0.65206	NA	0	2.70002	2.22277	1.83998	0	3	2	2	4930428O21Rik	lincRNA	chr5	1740
ENSMUSG00000086918.1	2.77001	-1.77981	2.78441	-0.639204	0.52269	NA	2.13447	4.50003	4.44554	0	2	5	4	0	4930429F24Rik	lincRNA	chr9	1520
ENSMUSG00000085295.7	0.229997	1.33177	4.96683	0.268132	0.788597	NA	0	0	0	0.919988	0	0	0	1	4930430E12Rik	antisense	chr4	1135
ENSMUSG00000046567.10	69.2502	0.0940372	0.542115	0.173464	0.862287	0.999934	65.1015	68.4004	80.0198	63.4792	61	76	72	69	4930430F08Rik	protein_coding	chr10	6275
ENSMUSG00000109147.1	46.8921	-0.111667	0.647433	-0.172476	0.863063	0.999934	57.6308	39.6002	54.4579	35.8795	54	44	49	39	4930431P19Rik	transcribed_processed_pseudogene	chr7	2959
ENSMUSG00000097007.3	4.83869	-1.00822	1.98059	-0.509051	0.610717	NA	6.40342	5.40003	1.11139	6.43992	6	6	1	7	4930432B10Rik	bidirectional_promoter_lncRNA	chr10	3634
ENSMUSG00000008129.14	19.4622	0.187826	1.02088	0.183984	0.854026	NA	17.0758	16.2001	34.453	10.1199	16	18	31	11	4930432K21Rik	protein_coding	chr8	2406
ENSMUSG00000087037.1	0.833539	2.23951	4.91947	0.455233	0.648942	NA	0	0	3.33416	0	0	0	3	0	4930432L08Rik	processed_transcript	chr5	1608
ENSMUSG00000112846.1	0.533619	-1.8095	4.93228	-0.366869	0.713717	NA	2.13447	0	0	0	2	0	0	0	4930432O09Rik	lincRNA	chr10	1986
ENSMUSG00000042360.12	2.82181	0.260585	2.44924	0.106394	0.91527	NA	3.20171	1.80001	4.44554	1.83998	3	2	4	2	4930433N12Rik	processed_transcript	chr9	1533
ENSMUSG00000111655.1	3.54257	0.754735	2.26231	0.333613	0.738672	NA	5.33619	0.900005	3.33416	4.59994	5	1	3	5	4930434F21Rik	bidirectional_promoter_lncRNA	chr9	845
ENSMUSG00000022798.8	0.266809	-1.24165	4.96683	-0.249988	0.802597	NA	1.06724	0	0	0	1	0	0	0	4930435E12Rik	protein_coding	chr16	1529
ENSMUSG00000069873.4	1.68569	0.986957	3.44641	0.286373	0.774593	NA	0	3.60002	2.22277	0.919988	0	4	2	1	4930438A08Rik	protein_coding	chr11	2093
ENSMUSG00000086064.1	0.450003	-1.81261	4.93254	-0.367481	0.71326	NA	0	1.80001	0	0	0	2	0	0	4930439A04Rik	antisense	chr1	861
ENSMUSG00000101905.1	5.7937	-0.586949	1.75133	-0.335145	0.737516	NA	8.5379	5.40003	5.55693	3.67995	8	6	5	4	4930439D14Rik	antisense	chr1	359
ENSMUSG00000085405.1	0.277846	1.334	4.96736	0.268553	0.788274	NA	0	0	1.11139	0	0	0	1	0	4930441J16Rik	lincRNA	chr2	516
ENSMUSG00000113974.1	0.277846	1.334	4.96736	0.268553	0.788274	NA	0	0	1.11139	0	0	0	1	0	4930442G10Rik	lincRNA	chr12	1096
ENSMUSG00000111629.1	0.229997	1.33177	4.96683	0.268132	0.788597	NA	0	0	0	0.919988	0	0	0	1	4930442G15Rik	lincRNA	chr9	1000
ENSMUSG00000108147.1	0.225001	-1.24388	4.96736	-0.250411	0.802269	NA	0	0.900005	0	0	0	1	0	0	4930443G03Rik	TEC	chr6	1282
ENSMUSG00000101674.6	0.544656	0.0456629	4.88765	0.00934252	0.992546	NA	1.06724	0	1.11139	0	1	0	1	0	4930444A19Rik	antisense	chr1	2666
ENSMUSG00000110737.1	0.266809	-1.24165	4.96683	-0.249988	0.802597	NA	1.06724	0	0	0	1	0	0	0	4930444F02Rik	lincRNA	chr10	6871
ENSMUSG00000115355.1	0.277846	1.334	4.96736	0.268553	0.788274	NA	0	0	1.11139	0	0	0	1	0	4930445E18Rik	lincRNA	chr15	1737
ENSMUSG00000115880.1	0.266809	-1.24165	4.96683	-0.249988	0.802597	NA	1.06724	0	0	0	1	0	0	0	4930445N06Rik	lincRNA	chr15	777
ENSMUSG00000097738.1	0.732845	1.31069	4.86178	0.26959	0.787476	NA	0	0.900005	1.11139	0.919988	0	1	1	1	4930445N18Rik	lincRNA	chr18	1685
ENSMUSG00000021098.14	0.229997	1.33177	4.96683	0.268132	0.788597	NA	0	0	0	0.919988	0	0	0	1	4930447C04Rik	protein_coding	chr12	5981
ENSMUSG00000102224.5	29.073	-0.243933	0.818739	-0.297938	0.765751	0.999934	33.0844	29.7002	22.2277	31.2796	31	33	20	34	4930447F24Rik	processed_transcript	chr9	1503
ENSMUSG00000106583.1	5.80603	0.961397	1.76757	0.543909	0.586504	NA	3.20171	4.50003	10.0025	5.51993	3	5	9	6	4930447N08Rik	processed_transcript	chr3	1650
ENSMUSG00000086824.1	3.10724	-2.57514	2.65225	-0.970927	0.331584	NA	4.26895	5.40003	0	2.75996	4	6	0	3	4930448D08Rik	antisense	chr18	1247
ENSMUSG00000097463.2	0.266809	-1.24165	4.96683	-0.249988	0.802597	NA	1.06724	0	0	0	1	0	0	0	4930448E22Rik	processed_transcript	chr9	3135
ENSMUSG00000104870.1	0.957846	0.848179	4.33423	0.195693	0.84485	NA	0	1.80001	1.11139	0.919988	0	2	1	1	4930448I18Rik	lincRNA	chr5	736
ENSMUSG00000022116.7	0.266809	-1.24165	4.96683	-0.249988	0.802597	NA	1.06724	0	0	0	1	0	0	0	4930449E01Rik	processed_transcript	chr14	1186
ENSMUSG00000105459.1	0.229997	1.33177	4.96683	0.268132	0.788597	NA	0	0	0	0.919988	0	0	0	1	4930449I04Rik	TEC	chr5	1123
ENSMUSG00000069223.10	0.507843	2.4877	4.89227	0.508496	0.611106	NA	0	0	1.11139	0.919988	0	0	1	1	4930451E10Rik	antisense	chr13	900
ENSMUSG00000022543.9	13.6229	0.522221	1.16775	0.447201	0.65473	NA	10.6724	11.7001	15.5594	16.5598	10	13	14	18	4930451G09Rik	transcribed_unitary_pseudogene	chr16	3444
ENSMUSG00000021747.12	24.3444	0.801728	0.899894	0.890914	0.372975	NA	21.3447	14.4001	26.6733	34.9595	20	16	24	38	4930452B06Rik	protein_coding	chr14	3279
ENSMUSG00000059920.9	748.116	-0.215863	0.20859	-1.03487	0.30073	0.999934	834.58	774.004	695.728	688.151	782	860	626	748	4930453N24Rik	protein_coding	chr16	5948
ENSMUSG00000112654.1	0.225001	-1.24388	4.96736	-0.250411	0.802269	NA	0	0.900005	0	0	0	1	0	0	4930455C13Rik	antisense	chr10	1018
ENSMUSG00000085761.1	2.74819	1.52566	2.51983	0.60546	0.544873	NA	1.06724	1.80001	4.44554	3.67995	1	2	4	4	4930455G09Rik	antisense	chr4	630
ENSMUSG00000080907.1	0.225001	-1.24388	4.96736	-0.250411	0.802269	NA	0	0.900005	0	0	0	1	0	0	4930455H04Rik	protein_coding	chr3	1341
ENSMUSG00000109861.1	2.40541	-0.694546	2.96841	-0.233979	0.815001	NA	3.20171	0.900005	0	5.51993	3	1	0	6	4930458B22Rik	lincRNA	chr7	754
ENSMUSG00000087611.1	11.6938	-0.437123	1.26834	-0.344641	0.730364	NA	12.8068	13.5001	6.66831	13.7998	12	15	6	15	4930458D05Rik	antisense	chr5	3055
ENSMUSG00000112762.1	0.732845	1.31069	4.86178	0.26959	0.787476	NA	0	0.900005	1.11139	0.919988	0	1	1	1	4930459C07Rik	lincRNA	chr10	1805
ENSMUSG00000086827.1	0.78569	3.01093	4.86092	0.619417	0.535642	NA	0	0	2.22277	0.919988	0	0	2	1	4930461C15Rik	lincRNA	chr16	1302
ENSMUSG00000097651.2	0.822502	0.571405	4.8531	0.11774	0.906274	NA	1.06724	0	2.22277	0	1	0	2	0	4930461G14Rik	lincRNA	chr9	843
ENSMUSG00000056682.8	0.450003	-1.81261	4.93254	-0.367481	0.71326	NA	0	1.80001	0	0	0	2	0	0	4930465K10Rik	pseudogene	chr18	1238
ENSMUSG00000087317.1	0.459994	1.89962	4.93227	0.385141	0.700133	NA	0	0	0	1.83998	0	0	0	2	4930466I24Rik	antisense	chr6	2264
ENSMUSG00000112332.1	6.68896	0.186424	1.63434	0.114067	0.909184	NA	5.33619	7.20004	7.7797	6.43992	5	8	7	7	4930466K18Rik	TEC	chr10	906
ENSMUSG00000096265.2	0.277846	1.334	4.96736	0.268553	0.788274	NA	0	0	1.11139	0	0	0	1	0	4930467E23Rik	protein_coding	chr8	2514
ENSMUSG00000097370.2	0.266809	-1.24165	4.96683	-0.249988	0.802597	NA	1.06724	0	0	0	1	0	0	0	4930467K11Rik	lincRNA	chr10	723
ENSMUSG00000085788.1	1.03042	-0.823566	4.62902	-0.177914	0.858791	NA	3.20171	0	0	0.919988	3	0	0	1	4930470G03Rik	bidirectional_promoter_lncRNA	chr13	2447
ENSMUSG00000097689.1	0.229997	1.33177	4.96683	0.268132	0.788597	NA	0	0	0	0.919988	0	0	0	1	4930471D02Rik	lincRNA	chr10	2075
ENSMUSG00000097693.3	1.23569	1.47497	3.90689	0.377531	0.705779	NA	0	1.80001	2.22277	0.919988	0	2	2	1	4930471M09Rik	transcribed_processed_pseudogene	chr6	3509
ENSMUSG00000060029.13	1.76327	-0.25927	3.05725	-0.084805	0.932416	NA	3.20171	0.900005	1.11139	1.83998	3	1	1	2	4930473A02Rik	antisense	chr2	1409
ENSMUSG00000113210.1	0.75862	-2.9187	4.86115	-0.600414	0.54823	NA	2.13447	0.900005	0	0	2	1	0	0	4930474N09Rik	lincRNA	chr12	1176
ENSMUSG00000104999.1	0.225001	-1.24388	4.96736	-0.250411	0.802269	NA	0	0.900005	0	0	0	1	0	0	4930477O15Rik	TEC	chr5	1089
ENSMUSG00000097847.1	0.229997	1.33177	4.96683	0.268132	0.788597	NA	0	0	0	0.919988	0	0	0	1	4930478K11Rik	antisense	chr12	715
ENSMUSG00000106950.1	0.450003	-1.81261	4.93254	-0.367481	0.71326	NA	0	1.80001	0	0	0	2	0	0	4930478M09Rik	TEC	chr5	1113
ENSMUSG00000116311.1	0.277846	1.334	4.96736	0.268553	0.788274	NA	0	0	1.11139	0	0	0	1	0	4930478M13Rik	antisense	chr15	443
ENSMUSG00000085238.1	1.22965	0.555084	3.57307	0.155352	0.876544	NA	1.06724	0.900005	1.11139	1.83998	1	1	1	2	4930479D17Rik	lincRNA	chr6	740
ENSMUSG00000109049.1	1.48043	-2.52108	3.62036	-0.696362	0.486202	NA	3.20171	1.80001	0	0.919988	3	2	0	1	4930479H17Rik	lincRNA	chr7	292
ENSMUSG00000086332.1	0.229997	1.33177	4.96683	0.268132	0.788597	NA	0	0	0	0.919988	0	0	0	1	4930480G23Rik	antisense	chr4	1013
ENSMUSG00000107567.1	1.57508	0.348567	3.56198	0.0978577	0.922045	NA	4.26895	0	1.11139	0.919988	4	0	1	1	4930480K02Rik	TEC	chr6	1054
ENSMUSG00000097284.7	51.3674	0.228294	0.630797	0.361914	0.717416	0.999934	54.4291	40.5002	48.901	61.6392	51	45	44	67	4930480K23Rik	lincRNA	chr14	3755
ENSMUSG00000086938.8	77.7269	0.121715	0.510982	0.238198	0.811727	0.999934	77.9083	71.1004	80.0198	81.8789	73	79	72	89	4930481A15Rik	antisense	chr19	2240
ENSMUSG00000085956.1	19.1856	0.224889	0.992909	0.226495	0.820817	NA	20.2775	15.3001	20.0049	21.1597	19	17	18	23	4930481B07Rik	processed_transcript	chr3	1490
ENSMUSG00000047938.7	0.780694	0.595588	4.88183	0.122001	0.902898	NA	0	0.900005	2.22277	0	0	1	2	0	4930483J18Rik	processed_transcript	chr15	1179
ENSMUSG00000086241.2	0.277846	1.334	4.96736	0.268553	0.788274	NA	0	0	1.11139	0	0	0	1	0	4930483K19Rik	antisense	chr10	1237
ENSMUSG00000109816.1	1.54931	1.79962	3.52862	0.510005	0.610048	NA	2.13447	0	2.22277	1.83998	2	0	2	2	4930483O08Rik	lincRNA	chr7	1030
ENSMUSG00000097520.2	0.229997	1.33177	4.96683	0.268132	0.788597	NA	0	0	0	0.919988	0	0	0	1	4930488L21Rik	antisense	chr8	6259
ENSMUSG00000097592.2	6.10436	0.93659	1.80511	0.518854	0.603863	NA	6.40342	1.80001	3.33416	12.8798	6	2	3	14	4930500F10Rik	antisense	chr9	1224
ENSMUSG00000044306.4	0.225001	-1.24388	4.96736	-0.250411	0.802269	NA	0	0.900005	0	0	0	1	0	0	4930500M09Rik	antisense	chr1	1563
ENSMUSG00000111303.1	0.229997	1.33177	4.96683	0.268132	0.788597	NA	0	0	0	0.919988	0	0	0	1	4930502A04Rik	lincRNA	chr9	865
ENSMUSG00000086799.1	0.811465	-0.480044	4.85336	-0.0989094	0.92121	NA	2.13447	0	1.11139	0	2	0	1	0	4930502E09Rik	processed_transcript	chr11	755
ENSMUSG00000055555.1	0.73784	3.00884	4.86114	0.618957	0.535944	NA	0	0	1.11139	1.83998	0	0	1	2	4930502E18Rik	protein_coding	chrX	1427
ENSMUSG00000090202.1	11.386	1.18578	1.28425	0.923325	0.355838	NA	7.47066	6.30004	18.8936	12.8798	7	7	17	14	4930503B20Rik	protein_coding	chr3	2404
ENSMUSG00000112364.1	0.811465	-0.480044	4.85336	-0.0989094	0.92121	NA	2.13447	0	1.11139	0	2	0	1	0	4930503E24Rik	transcribed_processed_pseudogene	chr10	1333
ENSMUSG00000044906.5	11.6639	-0.790411	1.26559	-0.62454	0.532273	NA	17.0758	12.6001	7.7797	9.19988	16	14	7	10	4930503L19Rik	protein_coding	chr18	3611
ENSMUSG00000040919.13	1.01569	3.48769	4.60068	0.75808	0.448403	NA	0	0	2.22277	1.83998	0	0	2	2	4930505A04Rik	protein_coding	chr11	990
ENSMUSG00000109414.1	0.533619	-1.8095	4.93228	-0.366869	0.713717	NA	2.13447	0	0	0	2	0	0	0	4930505K13Rik	lincRNA	chr7	546
ENSMUSG00000085740.1	0.496806	0.0450723	4.9968	0.00902022	0.992803	NA	1.06724	0	0	0.919988	1	0	0	1	4930505K14Rik	lincRNA	chr5	515
ENSMUSG00000097690.1	0.909997	0.0441603	4.80873	0.00918336	0.992673	NA	0	1.80001	0	1.83998	0	2	0	2	4930505N22Rik	lincRNA	chr19	945
ENSMUSG00000087478.1	5.99897	-0.208279	1.73235	-0.120229	0.904302	NA	5.33619	7.20004	7.7797	3.67995	5	8	7	4	4930506C21Rik	processed_transcript	chr17	1984
ENSMUSG00000097129.1	0.732845	1.31069	4.86178	0.26959	0.787476	NA	0	0.900005	1.11139	0.919988	0	1	1	1	4930507D05Rik	protein_coding	chr10	1834
ENSMUSG00000096986.2	11.0701	0.583418	1.29049	0.45209	0.651204	NA	10.6724	7.20004	14.448	11.9598	10	8	13	13	4930509E16Rik	lincRNA	chr9	1191
ENSMUSG00000096959.1	10.5993	1.23398	1.3346	0.924604	0.355172	NA	8.5379	4.50003	15.5594	13.7998	8	5	14	15	4930509G22Rik	lincRNA	chr16	2481
ENSMUSG00000105659.1	17.1096	-0.119259	1.04666	-0.113942	0.909284	NA	21.3447	14.4001	18.8936	13.7998	20	16	17	15	4930509H03Rik	sense_intronic	chr3	1215
ENSMUSG00000032048.3	0.266809	-1.24165	4.96683	-0.249988	0.802597	NA	1.06724	0	0	0	1	0	0	0	4930510E17Rik	lincRNA	chr9	1639
ENSMUSG00000108187.1	1.01069	1.8952	4.25152	0.445771	0.655763	NA	0	0.900005	2.22277	0.919988	0	1	2	1	4930511E03Rik	lincRNA	chr6	2232
ENSMUSG00000086607.7	0.266809	-1.24165	4.96683	-0.249988	0.802597	NA	1.06724	0	0	0	1	0	0	0	4930511M06Rik	processed_transcript	chr18	4161
ENSMUSG00000020992.5	0.769657	-1.21863	4.77276	-0.255331	0.798468	NA	1.06724	0.900005	1.11139	0	1	1	1	0	4930512B01Rik	processed_transcript	chr12	4603
ENSMUSG00000086866.2	2.54396	0.0454402	2.55893	0.0177575	0.985832	NA	3.20171	1.80001	3.33416	1.83998	3	2	3	2	4930512H18Rik	antisense	chr8	1611
ENSMUSG00000106741.3	2.27715	0.341277	2.68992	0.126873	0.899041	NA	2.13447	1.80001	3.33416	1.83998	2	2	3	2	4930513D17Rik	lincRNA	chr5	1456
ENSMUSG00000074136.9	5.67544	-0.469799	1.80349	-0.260495	0.794482	NA	7.47066	4.50003	8.89109	1.83998	7	5	8	2	4930513N10Rik	antisense	chr8	4342
ENSMUSG00000092183.1	17.648	0.326902	1.05284	0.310494	0.756185	NA	17.0758	13.5001	13.3366	26.6796	16	15	12	29	4930515G01Rik	antisense	chr5	1247
ENSMUSG00000111246.1	6.25	0.651741	1.69263	0.385047	0.700202	NA	4.26895	5.40003	8.89109	6.43992	4	6	8	7	4930517E14Rik	lincRNA	chr9	2972
ENSMUSG00000054391.12	0.496806	0.0450723	4.9968	0.00902022	0.992803	NA	1.06724	0	0	0.919988	1	0	0	1	4930517O19Rik	antisense	chr14	839
ENSMUSG00000074629.2	27.1438	0.178071	0.840916	0.211759	0.832295	0.999934	25.6137	25.2001	25.5619	32.1996	24	28	23	35	4930518I15Rik	protein_coding	chr2	1331
ENSMUSG00000110310.1	0.229997	1.33177	4.96683	0.268132	0.788597	NA	0	0	0	0.919988	0	0	0	1	4930518J21Rik	lincRNA	chr8	573
ENSMUSG00000086263.1	0.229997	1.33177	4.96683	0.268132	0.788597	NA	0	0	0	0.919988	0	0	0	1	4930519D14Rik	lincRNA	chr13	1137
ENSMUSG00000090126.1	1.26646	-0.465288	3.53353	-0.131678	0.895239	NA	2.13447	0.900005	1.11139	0.919988	2	1	1	1	4930519F09Rik	transcribed_processed_pseudogene	chr10	1396
ENSMUSG00000031325.15	0.229997	1.33177	4.96683	0.268132	0.788597	NA	0	0	0	0.919988	0	0	0	1	4930519F16Rik	transcribed_unitary_pseudogene	chrX	3067
ENSMUSG00000029564.12	0.266809	-1.24165	4.96683	-0.249988	0.802597	NA	1.06724	0	0	0	1	0	0	0	4930519G04Rik	protein_coding	chr5	3964
ENSMUSG00000114953.1	2.9093	0.0444841	2.40977	0.0184599	0.985272	NA	2.13447	3.60002	2.22277	3.67995	2	4	2	4	4930519K11Rik	bidirectional_promoter_lncRNA	chr14	2147
ENSMUSG00000097602.1	0.73784	3.00884	4.86114	0.618957	0.535944	NA	0	0	1.11139	1.83998	0	0	1	2	4930519P11Rik	protein_coding	chr2	501
ENSMUSG00000074039.10	40.6485	0.44766	0.696687	0.642555	0.520513	0.999934	39.4878	29.7002	45.5668	47.8394	37	33	41	52	4930520O04Rik	processed_transcript	chr9	3745
ENSMUSG00000072762.9	94.0571	-0.302687	0.47862	-0.632416	0.527115	0.999934	118.463	90.0005	76.6856	91.0788	111	100	69	99	4930522L14Rik	protein_coding	chr5	2409
ENSMUSG00000090394.8	242.417	-0.160921	0.32482	-0.495417	0.620306	0.999934	295.625	218.701	213.386	241.957	277	243	192	263	4930523C07Rik	protein_coding	chr1	10195
ENSMUSG00000020299.6	0.450003	-1.81261	4.93254	-0.367481	0.71326	NA	0	1.80001	0	0	0	2	0	0	4930524B15Rik	protein_coding	chr11	2000
ENSMUSG00000107217.1	0.229997	1.33177	4.96683	0.268132	0.788597	NA	0	0	0	0.919988	0	0	0	1	4930524B17Rik	lincRNA	chr6	1870
ENSMUSG00000035364.1	6.76388	0.891387	1.65555	0.538423	0.590285	NA	3.20171	6.30004	11.1139	6.43992	3	7	10	7	4930524J08Rik	protein_coding	chr5	603
ENSMUSG00000090207.2	15.6493	-0.521293	1.12982	-0.461395	0.644515	NA	24.5465	12.6001	8.89109	16.5598	23	14	8	18	4930524O07Rik	antisense	chr9	2360
ENSMUSG00000097276.1	9.04757	0.109272	1.41785	0.0770684	0.938569	NA	7.47066	9.90006	7.7797	11.0399	7	11	7	12	4930525G20Rik	antisense	chr13	2987
ENSMUSG00000085521.4	8.09052	-1.12488	1.51037	-0.744771	0.45641	NA	9.60514	12.6001	5.55693	4.59994	9	14	5	5	4930526A20Rik	transcribed_processed_pseudogene	chr17	1628
ENSMUSG00000097091.1	0.780694	0.595588	4.88183	0.122001	0.902898	NA	0	0.900005	2.22277	0	0	1	2	0	4930526L06Rik	antisense	chr19	1022
ENSMUSG00000105251.1	1.04146	0.834461	4.19109	0.199104	0.842182	NA	2.13447	0	1.11139	0.919988	2	0	1	1	4930526M16Rik	TEC	chr5	954
ENSMUSG00000070489.5	1.22965	0.555084	3.57307	0.155352	0.876544	NA	1.06724	0.900005	1.11139	1.83998	1	1	1	2	4930527J03Rik	processed_transcript	chr1	595
ENSMUSG00000097502.2	0.555693	1.90274	4.93253	0.385753	0.69968	NA	0	0	2.22277	0	0	0	2	0	4930528D03Rik	lincRNA	chr13	1997
ENSMUSG00000107012.1	3.05181	0.543413	2.3573	0.230524	0.817685	NA	3.20171	1.80001	4.44554	2.75996	3	2	4	3	4930528J11Rik	TEC	chr6	3611
ENSMUSG00000085350.1	0.229997	1.33177	4.96683	0.268132	0.788597	NA	0	0	0	0.919988	0	0	0	1	4930529I22Rik	lincRNA	chr2	589
ENSMUSG00000097261.2	5.06369	-1.11969	1.94147	-0.576725	0.564126	NA	6.40342	6.30004	1.11139	6.43992	6	7	1	7	4930532G15Rik	lincRNA	chr1	1866
ENSMUSG00000112201.1	0.277846	1.334	4.96736	0.268553	0.788274	NA	0	0	1.11139	0	0	0	1	0	4930532I03Rik	antisense	chr10	1846
ENSMUSG00000084798.1	0.229997	1.33177	4.96683	0.268132	0.788597	NA	0	0	0	0.919988	0	0	0	1	4930533B01Rik	antisense	chr2	1029
ENSMUSG00000097761.1	1.04146	0.834461	4.19109	0.199104	0.842182	NA	2.13447	0	1.11139	0.919988	2	0	1	1	4930534D22Rik	antisense	chr3	2715
ENSMUSG00000096969.1	0.684995	0.570179	4.85336	0.117481	0.906479	NA	0	0.900005	0	1.83998	0	1	0	2	4930535I16Rik	protein_coding	chr4	519
ENSMUSG00000093619.1	0.905001	-0.78734	4.8365	-0.162791	0.870683	NA	0	2.70002	0	0.919988	0	3	0	1	4930535L15Rik	antisense	chr9	536
ENSMUSG00000105350.1	1.27146	1.46288	3.86212	0.378778	0.704853	NA	2.13447	0	1.11139	1.83998	2	0	1	2	4930537H20Rik	antisense	chr3	1683
ENSMUSG00000048905.5	1660.61	0.474006	0.182872	2.59201	0.00954184	0.373607	1466.38	1312.21	1778.22	2085.61	1374	1458	1600	2267	4930539E08Rik	protein_coding	chr17	4648
ENSMUSG00000097032.2	37.3302	0.18054	0.751052	0.240382	0.810034	0.999934	45.8912	25.2001	32.2302	45.9994	43	28	29	50	4930539J05Rik	antisense	chr3	1668
ENSMUSG00000111299.1	0.266809	-1.24165	4.96683	-0.249988	0.802597	NA	1.06724	0	0	0	1	0	0	0	4930540M03Rik	antisense	chr9	437
ENSMUSG00000097831.1	0.732845	1.31069	4.86178	0.26959	0.787476	NA	0	0.900005	1.11139	0.919988	0	1	1	1	4930540M05Rik	lincRNA	chr6	2068
ENSMUSG00000087279.10	0.229997	1.33177	4.96683	0.268132	0.788597	NA	0	0	0	0.919988	0	0	0	1	4930544D05Rik	protein_coding	chr11	863
ENSMUSG00000115062.1	1.6368	-0.638652	3.46133	-0.184511	0.853613	NA	1.06724	1.80001	0	3.67995	1	2	0	4	4930544F09Rik	antisense	chr15	1724
ENSMUSG00000097071.2	0.496806	0.0450723	4.9968	0.00902022	0.992803	NA	1.06724	0	0	0.919988	1	0	0	1	4930544I03Rik	lincRNA	chr12	1417
ENSMUSG00000111767.1	0.266809	-1.24165	4.96683	-0.249988	0.802597	NA	1.06724	0	0	0	1	0	0	0	4930546K05Rik	lincRNA	chr9	3977
ENSMUSG00000097890.2	4.19076	0.834323	2.07268	0.402533	0.687292	NA	4.26895	1.80001	3.33416	7.3599	4	2	3	8	4930547M16Rik	bidirectional_promoter_lncRNA	chr10	2400
ENSMUSG00000051198.6	1.61682	-3.82838	3.80173	-1.00701	0.313929	NA	1.06724	5.40003	0	0	1	6	0	0	4930548G14Rik	lincRNA	chr15	1185
ENSMUSG00000029138.4	1.46464	2.50066	3.68767	0.678114	0.497699	NA	1.06724	0	1.11139	3.67995	1	0	1	4	4930548H24Rik	protein_coding	chr5	2737
ENSMUSG00000114048.1	0.266809	-1.24165	4.96683	-0.249988	0.802597	NA	1.06724	0	0	0	1	0	0	0	4930549C15Rik	antisense	chr12	1260
ENSMUSG00000005131.4	5.87645	0.502026	1.73893	0.288698	0.772813	NA	4.26895	5.40003	5.55693	8.27989	4	6	5	9	4930550C14Rik	protein_coding	chr9	3539
ENSMUSG00000086430.1	0.491811	-2.39757	4.89228	-0.490072	0.624083	NA	1.06724	0.900005	0	0	1	1	0	0	4930551O13Rik	antisense	chr2	1065
ENSMUSG00000097632.1	24.151	0.71571	0.902977	0.792611	0.428005	NA	18.143	17.1001	41.1213	20.2397	17	19	37	22	4930552P12Rik	lincRNA	chr19	2496
ENSMUSG00000111165.1	6.2918	0.627198	1.683	0.372666	0.709397	NA	5.33619	4.50003	8.89109	6.43992	5	5	8	7	4930553I21Rik	TEC	chr10	580
ENSMUSG00000106791.1	0.229997	1.33177	4.96683	0.268132	0.788597	NA	0	0	0	0.919988	0	0	0	1	4930553P18Rik	lincRNA	chr6	1659
ENSMUSG00000106359.1	0.957846	0.848179	4.33423	0.195693	0.84485	NA	0	1.80001	1.11139	0.919988	0	2	1	1	4930554G22Rik	TEC	chr3	686
ENSMUSG00000097682.1	0.277846	1.334	4.96736	0.268553	0.788274	NA	0	0	1.11139	0	0	0	1	0	4930554H23Rik	lincRNA	chr7	2542
ENSMUSG00000115656.1	0.229997	1.33177	4.96683	0.268132	0.788597	NA	0	0	0	0.919988	0	0	0	1	4930556J02Rik	lincRNA	chr14	3272
ENSMUSG00000034493.1	17.034	0.489494	1.05058	0.46593	0.641266	NA	13.8741	14.4001	17.7822	22.0797	13	16	16	24	4930556J24Rik	protein_coding	chr11	1220
ENSMUSG00000096971.2	23.5814	0.253738	0.910772	0.278596	0.780555	NA	28.8154	15.3001	24.4505	25.7597	27	17	22	28	4930556M19Rik	processed_transcript	chr15	7014
ENSMUSG00000111924.1	0.454998	0.0444687	4.88765	0.00909818	0.992741	NA	0	0.900005	0	0.919988	0	1	0	1	4930556N09Rik	lincRNA	chr10	1015
ENSMUSG00000108034.1	0.266809	-1.24165	4.96683	-0.249988	0.802597	NA	1.06724	0	0	0	1	0	0	0	4930557K07Rik	antisense	chr6	363
ENSMUSG00000105734.1	0.277846	1.334	4.96736	0.268553	0.788274	NA	0	0	1.11139	0	0	0	1	0	4930558C23Rik	protein_coding	chr3	731
ENSMUSG00000097519.2	7.12793	-0.217228	1.58619	-0.13695	0.89107	NA	6.40342	9.00005	6.66831	6.43992	6	10	6	7	4930558J18Rik	lincRNA	chr1	2052
ENSMUSG00000075029.7	2.99292	0.044848	2.38865	0.0187754	0.98502	NA	4.26895	1.80001	2.22277	3.67995	4	2	2	4	4930558J22Rik	antisense	chr13	1480
ENSMUSG00000086277.2	0.266809	-1.24165	4.96683	-0.249988	0.802597	NA	1.06724	0	0	0	1	0	0	0	4930558K02Rik	protein_coding	chr1	1167
ENSMUSG00000097387.1	2.82464	0.372953	2.52747	0.14756	0.88269	NA	1.06724	3.60002	1.11139	5.51993	1	4	1	6	4930563E18Rik	lincRNA	chr18	1553
ENSMUSG00000053574.4	4.66653	-0.305511	1.96872	-0.155183	0.876677	NA	6.40342	3.60002	2.22277	6.43992	6	4	2	7	4930563E22Rik	processed_transcript	chr11	3313
ENSMUSG00000050702.6	0.266809	-1.24165	4.96683	-0.249988	0.802597	NA	1.06724	0	0	0	1	0	0	0	4930563M21Rik	protein_coding	chr9	1924
ENSMUSG00000084834.1	0.266809	-1.24165	4.96683	-0.249988	0.802597	NA	1.06724	0	0	0	1	0	0	0	4930565N06Rik	antisense	chr16	2416
ENSMUSG00000110629.1	0.266809	-1.24165	4.96683	-0.249988	0.802597	NA	1.06724	0	0	0	1	0	0	0	4930567H12Rik	lincRNA	chr8	2010
ENSMUSG00000085084.7	0.496806	0.0450723	4.9968	0.00902022	0.992803	NA	1.06724	0	0	0.919988	1	0	0	1	4930570G19Rik	lincRNA	chr3	4176
ENSMUSG00000089683.2	0.502848	0.045031	4.99583	0.00901372	0.992808	NA	0	0.900005	1.11139	0	0	1	1	0	4930570N18Rik	antisense	chr1	332
ENSMUSG00000086467.2	0.450003	-1.81261	4.93254	-0.367481	0.71326	NA	0	1.80001	0	0	0	2	0	0	4930571N24Rik	processed_transcript	chr15	976
ENSMUSG00000115725.1	0.229997	1.33177	4.96683	0.268132	0.788597	NA	0	0	0	0.919988	0	0	0	1	4930572G02Rik	lincRNA	chr14	6755
ENSMUSG00000106020.1	2.105	2.20647	3.09261	0.713467	0.475557	NA	2.13447	0	4.44554	1.83998	2	0	4	2	4930573C15Rik	lincRNA	chr5	777
ENSMUSG00000087440.2	13.9831	0.0450741	1.15784	0.0389294	0.968947	NA	17.0758	10.8001	13.3366	14.7198	16	12	12	16	4930577N17Rik	TEC	chr3	1625
ENSMUSG00000097587.2	4.21862	-0.455162	2.02991	-0.224227	0.822581	NA	4.26895	5.40003	4.44554	2.75996	4	6	4	3	4930578M01Rik	processed_transcript	chr15	6788
ENSMUSG00000110586.1	0.225001	-1.24388	4.96736	-0.250411	0.802269	NA	0	0.900005	0	0	0	1	0	0	4930578M07Rik	processed_transcript	chr8	1120
ENSMUSG00000040840.7	0.769657	-1.21863	4.77276	-0.255331	0.798468	NA	1.06724	0.900005	1.11139	0	1	1	1	0	4930579G18Rik	antisense	chr14	968
ENSMUSG00000027811.9	44.2162	-0.162482	0.665079	-0.244304	0.806995	0.999934	44.824	48.6003	41.1213	42.3194	42	54	37	46	4930579G24Rik	protein_coding	chr3	1970
ENSMUSG00000051074.4	8.3749	1.40365	1.53345	0.915356	0.360005	NA	2.13447	8.10005	12.2252	11.0399	2	9	11	12	4930579K19Rik	processed_transcript	chr9	1273
ENSMUSG00000086190.1	0.229997	1.33177	4.96683	0.268132	0.788597	NA	0	0	0	0.919988	0	0	0	1	4930579M01Rik	antisense	chr8	933
ENSMUSG00000106269.1	0.496806	0.0450723	4.9968	0.00902022	0.992803	NA	1.06724	0	0	0.919988	1	0	0	1	4930580E04Rik	lincRNA	chr5	690
ENSMUSG00000070315.12	198.199	0.608935	0.33816	1.80073	0.0717453	0.999934	168.623	145.801	245.616	232.757	158	162	221	253	4930581F22Rik	processed_transcript	chr9	5954
ENSMUSG00000055159.7	1.27146	1.46288	3.86212	0.378778	0.704853	NA	2.13447	0	1.11139	1.83998	2	0	1	2	4930583K01Rik	bidirectional_promoter_lncRNA	chr7	925
ENSMUSG00000086009.1	0.450003	-1.81261	4.93254	-0.367481	0.71326	NA	0	1.80001	0	0	0	2	0	0	4930587A21Rik	lincRNA	chr1	851
ENSMUSG00000108935.1	0.555693	1.90274	4.93253	0.385753	0.69968	NA	0	0	2.22277	0	0	0	2	0	4930588G17Rik	antisense	chr7	1474
ENSMUSG00000068957.1	0.675004	-2.14938	4.91948	-0.436911	0.662176	NA	0	2.70002	0	0	0	3	0	0	4930589L23Rik	lincRNA	chr3	1364
ENSMUSG00000107195.1	16.174	0.606073	1.07863	0.561894	0.574188	NA	16.0086	9.90006	22.2277	16.5598	15	11	20	18	4930589O11Rik	TEC	chr5	920
ENSMUSG00000034063.8	12.438	-0.566694	1.26705	-0.447256	0.65469	NA	10.6724	18.0001	15.5594	5.51993	10	20	14	6	4930590J08Rik	protein_coding	chr6	5175
ENSMUSG00000115779.1	0.502848	0.045031	4.99583	0.00901372	0.992808	NA	0	0.900005	1.11139	0	0	1	1	0	4930592A05Rik	antisense	chr15	1006
ENSMUSG00000105834.1	2.01035	0.822411	2.87033	0.286522	0.774478	NA	1.06724	1.80001	3.33416	1.83998	1	2	3	2	4930592C13Rik	antisense	chr3	661
ENSMUSG00000097725.4	1.90361	-1.24708	3.25692	-0.382901	0.701793	NA	2.13447	1.80001	0	3.67995	2	2	0	4	4930593A02Rik	lincRNA	chr3	2032
ENSMUSG00000103948.1	125.214	0.1492	0.415493	0.359092	0.719526	0.999934	112.06	125.101	142.257	121.438	105	139	128	132	4930594C11Rik	TEC	chr1	2755
ENSMUSG00000075463.3	10.4576	0.0567331	1.32412	0.0428459	0.965824	NA	9.60514	10.8001	12.2252	9.19988	9	12	11	10	4930594M22Rik	processed_transcript	chr14	4342
ENSMUSG00000083193.1	0.277846	1.334	4.96736	0.268553	0.788274	NA	0	0	1.11139	0	0	0	1	0	4930595D18Rik	protein_coding	chr12	818
ENSMUSG00000060673.2	0.266809	-1.24165	4.96683	-0.249988	0.802597	NA	1.06724	0	0	0	1	0	0	0	4930595M18Rik	protein_coding	chrX	2644
ENSMUSG00000104900.1	41.6458	-0.274853	0.709473	-0.387405	0.698457	0.999934	55.4963	36.0002	30.0074	45.0794	52	40	27	49	4930596I21Rik	sense_intronic	chr1	461
ENSMUSG00000053442.4	3.27181	-0.236062	2.28721	-0.103209	0.917797	NA	3.20171	3.60002	4.44554	1.83998	3	4	4	2	4930597O21Rik	processed_transcript	chr6	1282
ENSMUSG00000097005.1	0.496806	0.0450723	4.9968	0.00902022	0.992803	NA	1.06724	0	0	0.919988	1	0	0	1	4930598A11Rik	lincRNA	chr4	628
ENSMUSG00000073144.4	18.6076	0.764515	1.00913	0.757601	0.44869	NA	16.0086	11.7001	25.5619	21.1597	15	13	23	23	4930599N23Rik	antisense	chr6	880
ENSMUSG00000093772.1	0.75862	-2.9187	4.86115	-0.600414	0.54823	NA	2.13447	0.900005	0	0	2	1	0	0	4931403E22Rik	processed_transcript	chr19	668
ENSMUSG00000013353.10	0.229997	1.33177	4.96683	0.268132	0.788597	NA	0	0	0	0.919988	0	0	0	1	4931406B18Rik	protein_coding	chr7	5633
ENSMUSG00000031938.15	1523.28	-0.0385954	0.176224	-0.219014	0.826639	0.999934	1375.67	1701.91	1270.31	1745.22	1289	1891	1143	1897	4931406C07Rik	protein_coding	chr9	10871
ENSMUSG00000085398.1	4.57638	1.03174	1.99053	0.518322	0.604234	NA	2.13447	3.60002	8.89109	3.67995	2	4	8	4	4931406G06Rik	antisense	chr16	1252
ENSMUSG00000066571.13	593.143	-0.0740578	0.223802	-0.330909	0.740714	0.999934	621.132	595.803	572.364	583.272	582	662	515	634	4931406P16Rik	protein_coding	chr7	8239
ENSMUSG00000085088.1	0.229997	1.33177	4.96683	0.268132	0.788597	NA	0	0	0	0.919988	0	0	0	1	4931413K12Rik	processed_transcript	chr11	1282
ENSMUSG00000022179.5	99.8369	0.37637	0.456128	0.825141	0.409291	0.999934	78.9756	94.5005	98.9133	126.958	74	105	89	138	4931414P19Rik	protein_coding	chr14	3078
ENSMUSG00000054910.5	0.266809	-1.24165	4.96683	-0.249988	0.802597	NA	1.06724	0	0	0	1	0	0	0	4931415C17Rik	processed_transcript	chr8	2959
ENSMUSG00000106589.1	0.229997	1.33177	4.96683	0.268132	0.788597	NA	0	0	0	0.919988	0	0	0	1	4931419H13Rik	antisense	chr3	973
ENSMUSG00000046085.7	0.277846	1.334	4.96736	0.268553	0.788274	NA	0	0	1.11139	0	0	0	1	0	4931422A03Rik	protein_coding	chr2	1602
ENSMUSG00000026774.11	1.48043	-2.52108	3.62036	-0.696362	0.486202	NA	3.20171	1.80001	0	0.919988	3	2	0	1	4931423N10Rik	protein_coding	chr2	2004
ENSMUSG00000014837.15	64.396	0.0178265	0.558492	0.031919	0.974537	0.999934	62.967	64.8004	70.0173	59.7992	59	72	63	65	4931428F04Rik	protein_coding	chr8	4045
ENSMUSG00000086727.8	2.18645	0.73726	2.80985	0.262384	0.793025	NA	2.13447	0.900005	1.11139	4.59994	2	1	1	5	4931428L18Rik	protein_coding	chr1	3751
ENSMUSG00000056617.12	0.225001	-1.24388	4.96736	-0.250411	0.802269	NA	0	0.900005	0	0	0	1	0	0	4931429L15Rik	protein_coding	chr9	2125
ENSMUSG00000055061.5	0.225001	-1.24388	4.96736	-0.250411	0.802269	NA	0	0.900005	0	0	0	1	0	0	4931431C16Rik	antisense	chr5	2735
ENSMUSG00000078157.1	30.2203	0.236023	0.843862	0.279694	0.779713	0.999934	43.7567	15.3001	27.7846	34.0396	41	17	25	37	4931440F15Rik	protein_coding	chr11	3274
ENSMUSG00000097775.1	2.06923	2.11182	3.18949	0.66212	0.507895	NA	0	1.80001	5.55693	0.919988	0	2	5	1	4931440J10Rik	lincRNA	chr14	891
ENSMUSG00000074580.11	18.0702	-0.0851256	1.01927	-0.083516	0.933441	NA	19.2103	18.0001	16.6708	18.3998	18	20	15	20	4931440P22Rik	transcribed_processed_pseudogene	chr3	4437
ENSMUSG00000100733.2	0.555693	1.90274	4.93253	0.385753	0.69968	NA	0	0	2.22277	0	0	0	2	0	4932411K12Rik	lincRNA	chr13	4504
ENSMUSG00000078962.4	0.229997	1.33177	4.96683	0.268132	0.788597	NA	0	0	0	0.919988	0	0	0	1	4932414J04Rik	lincRNA	chr11	3493
ENSMUSG00000062036.9	0.800428	-2.14586	4.9193	-0.436213	0.662682	NA	3.20171	0	0	0	3	0	0	0	4932415M13Rik	transcribed_processed_pseudogene	chr17	3063
ENSMUSG00000105881.1	9.5305	-0.100396	1.3818	-0.0726554	0.94208	NA	11.7396	8.10005	10.0025	8.27989	11	9	9	9	4932422M17Rik	lincRNA	chr5	2639
ENSMUSG00000097135.1	0.951805	-0.75395	4.34432	-0.173549	0.86222	NA	1.06724	0.900005	0	1.83998	1	1	0	2	4932430I15Rik	lincRNA	chr5	3306
ENSMUSG00000074224.3	0.229997	1.33177	4.96683	0.268132	0.788597	NA	0	0	0	0.919988	0	0	0	1	4932431P20Rik	transcribed_unitary_pseudogene	chr7	9479
ENSMUSG00000062391.3	0.266809	-1.24165	4.96683	-0.249988	0.802597	NA	1.06724	0	0	0	1	0	0	0	4932435O22Rik	lincRNA	chr11	3496
ENSMUSG00000037270.18	3702.66	-0.2287	0.167921	-1.36195	0.173213	0.999934	3849.52	4085.12	2820.7	4055.31	3607	4539	2538	4408	4932438A13Rik	protein_coding	chr3	32279
ENSMUSG00000039851.11	39.7187	0.595366	0.727576	0.818287	0.413194	0.999934	48.0257	18.9001	47.7896	44.1594	45	21	43	48	4932438H23Rik	protein_coding	chr16	2865
ENSMUSG00000104443.1	5.13966	0.0528219	1.86114	0.0283815	0.977358	NA	3.20171	7.20004	5.55693	4.59994	3	8	5	5	4932442E05Rik	TEC	chr10	2717
ENSMUSG00000086805.9	1.04146	0.834461	4.19109	0.199104	0.842182	NA	2.13447	0	1.11139	0.919988	2	0	1	1	4932443L11Rik	antisense	chr8	2827
ENSMUSG00000086796.2	0.229997	1.33177	4.96683	0.268132	0.788597	NA	0	0	0	0.919988	0	0	0	1	4932702P03Rik	antisense	chr13	4558
ENSMUSG00000106306.4	1.13999	0.361277	4.35554	0.0829467	0.933894	NA	0	1.80001	0	2.75996	0	2	0	3	4933401H06Rik	processed_transcript	chr3	1202
ENSMUSG00000102693.1	0.266809	-1.24165	4.96683	-0.249988	0.802597	NA	1.06724	0	0	0	1	0	0	0	4933401J01Rik	TEC	chr1	1070
ENSMUSG00000045330.8	0.277846	1.334	4.96736	0.268553	0.788274	NA	0	0	1.11139	0	0	0	1	0	4933402E13Rik	protein_coding	chrX	2025
ENSMUSG00000115845.1	5.15206	3.75042	2.21993	1.68943	0.0911373	NA	2.13447	0	11.1139	7.3599	2	0	10	8	4933402J15Rik	lincRNA	chr14	1660
ENSMUSG00000103321.1	0.78569	3.01093	4.86092	0.619417	0.535642	NA	0	0	2.22277	0.919988	0	0	2	1	4933403L11Rik	TEC	chr2	1121
ENSMUSG00000097908.7	16.0891	0.140801	1.07756	0.130666	0.896039	NA	18.143	12.6001	18.8936	14.7198	17	14	17	16	4933404O12Rik	lincRNA	chr5	4748
ENSMUSG00000097852.5	2.50715	0.630043	2.57422	0.244751	0.80665	NA	2.13447	1.80001	3.33416	2.75996	2	2	3	3	4933405D12Rik	antisense	chr3	1479
ENSMUSG00000110427.1	0.266809	-1.24165	4.96683	-0.249988	0.802597	NA	1.06724	0	0	0	1	0	0	0	4933406B17Rik	lincRNA	chr8	4333
ENSMUSG00000097494.7	67.0054	0.545829	0.550149	0.992148	0.321125	0.999934	59.7653	49.5003	77.797	80.9589	56	55	70	88	4933406C10Rik	lincRNA	chr12	2569
ENSMUSG00000087475.3	3.18715	0.327726	2.30758	0.142021	0.887063	NA	2.13447	3.60002	3.33416	3.67995	2	4	3	4	4933406I18Rik	lincRNA	chr7	1650
ENSMUSG00000107666.1	0.555693	1.90274	4.93253	0.385753	0.69968	NA	0	0	2.22277	0	0	0	2	0	4933406J09Rik	antisense	chr6	1505
ENSMUSG00000086690.1	0.450003	-1.81261	4.93254	-0.367481	0.71326	NA	0	1.80001	0	0	0	2	0	0	4933406J10Rik	antisense	chr7	963
ENSMUSG00000085820.7	0.533619	-1.8095	4.93228	-0.366869	0.713717	NA	2.13447	0	0	0	2	0	0	0	4933406K04Rik	lincRNA	chr12	2670
ENSMUSG00000069713.2	20.442	0.0419821	0.960994	0.0436861	0.965155	NA	22.412	18.0001	21.1163	20.2397	21	20	19	22	4933406P04Rik	lincRNA	chr10	1789
ENSMUSG00000087396.7	113.832	-0.387862	0.432964	-0.895829	0.370344	0.999934	119.531	138.601	103.359	93.8388	112	154	93	102	4933407K13Rik	processed_transcript	chrX	6432
ENSMUSG00000049357.11	19.3272	0.636939	0.989427	0.643746	0.51974	NA	14.9413	15.3001	22.2277	24.8397	14	17	20	27	4933408B17Rik	protein_coding	chr18	2434
ENSMUSG00000097407.1	0.507843	2.4877	4.89227	0.508496	0.611106	NA	0	0	1.11139	0.919988	0	0	1	1	4933408J17Rik	lincRNA	chr10	1859
ENSMUSG00000113218.1	0.496806	0.0450723	4.9968	0.00902022	0.992803	NA	1.06724	0	0	0.919988	1	0	0	1	4933409F18Rik	lincRNA	chr12	2152
ENSMUSG00000053896.14	0.496806	0.0450723	4.9968	0.00902022	0.992803	NA	1.06724	0	0	0.919988	1	0	0	1	4933409G03Rik	protein_coding	chr2	1438
ENSMUSG00000099608.1	0.266809	-1.24165	4.96683	-0.249988	0.802597	NA	1.06724	0	0	0	1	0	0	0	4933411E06Rik	lincRNA	chr1	1493
ENSMUSG00000062224.6	0.229997	1.33177	4.96683	0.268132	0.788597	NA	0	0	0	0.919988	0	0	0	1	4933411G06Rik	lincRNA	chr10	1022
ENSMUSG00000090369.3	5.86862	0.101909	1.74424	0.0584261	0.953409	NA	6.40342	4.50003	8.89109	3.67995	6	5	8	4	4933411K16Rik	protein_coding	chr19	1380
ENSMUSG00000043623.7	2.22931	0.340877	2.71186	0.125698	0.899971	NA	2.13447	1.80001	2.22277	2.75996	2	2	2	3	4933412A08Rik	pseudogene	chr19	1343
ENSMUSG00000112627.1	9.82513	0.482302	1.40819	0.342498	0.731976	NA	10.6724	5.40003	6.66831	16.5598	10	6	6	18	4933412E12Rik	bidirectional_promoter_lncRNA	chr10	2434
ENSMUSG00000108227.1	0.266809	-1.24165	4.96683	-0.249988	0.802597	NA	1.06724	0	0	0	1	0	0	0	4933412L11Rik	TEC	chr6	1044
ENSMUSG00000089952.1	23.0525	-0.180306	0.907387	-0.198709	0.842491	NA	25.6137	23.4001	21.1163	22.0797	24	26	19	24	4933413C19Rik	sense_intronic	chr19	2217
ENSMUSG00000021874.12	0.533619	-1.8095	4.93228	-0.366869	0.713717	NA	2.13447	0	0	0	2	0	0	0	4933413J09Rik	lincRNA	chr14	4837
ENSMUSG00000045877.2	10.3038	-1.09713	1.34473	-0.815871	0.414574	NA	12.8068	15.3001	6.66831	6.43992	12	17	6	7	4933415A04Rik	protein_coding	chr11	2009
ENSMUSG00000074734.3	0.266809	-1.24165	4.96683	-0.249988	0.802597	NA	1.06724	0	0	0	1	0	0	0	4933416C03Rik	protein_coding	chr10	2254
ENSMUSG00000097262.2	1.91181	0.284023	3.49199	0.0813355	0.935175	NA	3.20171	0	4.44554	0	3	0	4	0	4933416M07Rik	antisense	chr8	624
ENSMUSG00000103006.1	5.62438	-0.224882	1.7858	-0.125928	0.899789	NA	6.40342	5.40003	3.33416	7.3599	6	6	3	8	4933417C20Rik	TEC	chr1	1874
ENSMUSG00000097637.1	0.946809	-1.66636	4.35035	-0.383041	0.701689	NA	1.06724	1.80001	0	0.919988	1	2	0	1	4933417D19Rik	antisense	chr8	1229
ENSMUSG00000106572.1	0.229997	1.33177	4.96683	0.268132	0.788597	NA	0	0	0	0.919988	0	0	0	1	4933417G07Rik	transcribed_processed_pseudogene	chr3	1296
ENSMUSG00000086443.1	3.85611	-0.371036	2.12469	-0.174631	0.86137	NA	3.20171	5.40003	2.22277	4.59994	3	6	2	5	4933421A08Rik	processed_transcript	chr4	1638
ENSMUSG00000110410.1	0.229997	1.33177	4.96683	0.268132	0.788597	NA	0	0	0	0.919988	0	0	0	1	4933421D24Rik	antisense	chr8	1286
ENSMUSG00000085037.1	128.796	0.272636	0.406036	0.671457	0.50193	0.999934	122.732	110.701	145.592	136.158	115	123	131	148	4933421O10Rik	processed_transcript	chr4	3847
ENSMUSG00000111746.1	0.905001	-0.78734	4.8365	-0.162791	0.870683	NA	0	2.70002	0	0.919988	0	3	0	1	4933422A05Rik	lincRNA	chr9	1356
ENSMUSG00000085471.1	3.72077	-0.160616	2.14166	-0.0749962	0.940218	NA	4.26895	3.60002	3.33416	3.67995	4	4	3	4	4933423P22Rik	antisense	chr2	5536
ENSMUSG00000102416.4	0.905001	-0.78734	4.8365	-0.162791	0.870683	NA	0	2.70002	0	0.919988	0	3	0	1	4933424G06Rik	protein_coding	chr1	1744
ENSMUSG00000106508.1	8.93214	0.542052	1.44235	0.375811	0.707058	NA	4.26895	10.8001	7.7797	12.8798	4	12	7	14	4933425M03Rik	TEC	chr3	1544
ENSMUSG00000086933.1	2.19749	1.72058	2.81899	0.610352	0.541629	NA	1.06724	0.900005	2.22277	4.59994	1	1	2	5	4933426K07Rik	antisense	chr11	1548
ENSMUSG00000055403.13	0.833539	2.23951	4.91947	0.455233	0.648942	NA	0	0	3.33416	0	0	0	3	0	4933427D06Rik	lincRNA	chr6	2914
ENSMUSG00000020807.14	234.201	-0.330762	0.314906	-1.05035	0.293556	0.999934	230.523	291.602	185.601	229.077	216	324	167	249	4933427D14Rik	protein_coding	chr11	5697
ENSMUSG00000044276.2	0.689991	2.23599	4.9193	0.454534	0.649445	NA	0	0	0	2.75996	0	0	0	3	4933427E11Rik	antisense	chr15	1214
ENSMUSG00000033015.16	0.266809	-1.24165	4.96683	-0.249988	0.802597	NA	1.06724	0	0	0	1	0	0	0	4933427E13Rik	lincRNA	chr11	2075
ENSMUSG00000086697.1	0.225001	-1.24388	4.96736	-0.250411	0.802269	NA	0	0.900005	0	0	0	1	0	0	4933427G23Rik	transcribed_processed_pseudogene	chr5	2515
ENSMUSG00000073761.2	2.54896	0.80014	2.58885	0.309072	0.757267	NA	3.20171	0.900005	3.33416	2.75996	3	1	3	3	4933427I04Rik	protein_coding	chr4	2183
ENSMUSG00000085928.1	0.266809	-1.24165	4.96683	-0.249988	0.802597	NA	1.06724	0	0	0	1	0	0	0	4933427I22Rik	lincRNA	chr4	1548
ENSMUSG00000105203.1	0.266809	-1.24165	4.96683	-0.249988	0.802597	NA	1.06724	0	0	0	1	0	0	0	4933428P19Rik	antisense	chr10	1376
ENSMUSG00000097786.3	0.502848	0.045031	4.99583	0.00901372	0.992808	NA	0	0.900005	1.11139	0	0	1	1	0	4933429H19Rik	antisense	chr3	995
ENSMUSG00000115008.1	0.229997	1.33177	4.96683	0.268132	0.788597	NA	0	0	0	0.919988	0	0	0	1	4933429O19Rik	processed_transcript	chr14	2989
ENSMUSG00000058046.1	6.44559	-1.24939	1.71736	-0.727506	0.466916	NA	11.7396	6.30004	2.22277	5.51993	11	7	2	6	4933430I17Rik	protein_coding	chr4	1783
ENSMUSG00000108523.1	0.721808	-1.21757	4.86122	-0.250466	0.802227	NA	1.06724	0.900005	0	0.919988	1	1	0	1	4933430L12Rik	antisense	chr7	1194
ENSMUSG00000086892.1	0.277846	1.334	4.96736	0.268553	0.788274	NA	0	0	1.11139	0	0	0	1	0	4933430M04Rik	lincRNA	chr11	744
ENSMUSG00000086968.8	337.818	0.374017	0.282008	1.32626	0.184753	0.999934	307.364	279.902	338.973	425.034	288	311	305	462	4933431E20Rik	antisense	chr3	6821
ENSMUSG00000115774.1	0.225001	-1.24388	4.96736	-0.250411	0.802269	NA	0	0.900005	0	0	0	1	0	0	4933431J24Rik	lincRNA	chr14	3315
ENSMUSG00000103715.1	23.9174	-0.199022	0.897846	-0.221666	0.824574	NA	23.4792	27.0002	16.6708	28.5196	22	30	15	31	4933431K14Rik	TEC	chr9	1352
ENSMUSG00000086451.8	0.266809	-1.24165	4.96683	-0.249988	0.802597	NA	1.06724	0	0	0	1	0	0	0	4933431K23Rik	processed_transcript	chr8	5337
ENSMUSG00000097021.7	17.4065	0.616479	1.04123	0.592069	0.553804	NA	14.9413	12.6001	20.0049	22.0797	14	14	18	24	4933433G15Rik	lincRNA	chr9	1815
ENSMUSG00000114362.1	1.66862	-1.95023	3.40232	-0.573206	0.566505	NA	2.13447	2.70002	0	1.83998	2	3	0	2	4933433G19Rik	antisense	chr13	2402
ENSMUSG00000027942.16	785.152	-0.0720735	0.208171	-0.346222	0.729176	0.999934	790.823	817.205	811.312	721.271	741	908	730	784	4933434E20Rik	protein_coding	chr3	6826
ENSMUSG00000108345.1	2.49112	-0.539873	2.58059	-0.209205	0.834288	NA	3.20171	2.70002	2.22277	1.83998	3	3	2	2	4933435G04Rik	lincRNA	chr7	2108
ENSMUSG00000103844.1	0.225001	-1.24388	4.96736	-0.250411	0.802269	NA	0	0.900005	0	0	0	1	0	0	4933436E23Rik	lincRNA	chr1	1111
ENSMUSG00000108924.1	1.73749	1.34032	3.08635	0.434272	0.664091	NA	1.06724	0.900005	2.22277	2.75996	1	1	2	3	4933436H12Rik	lincRNA	chr7	1614
ENSMUSG00000104719.1	2.69534	1.01058	2.52545	0.400159	0.689039	NA	1.06724	2.70002	3.33416	3.67995	1	3	3	4	4933437G19Rik	TEC	chr5	1178
ENSMUSG00000086160.1	0.229997	1.33177	4.96683	0.268132	0.788597	NA	0	0	0	0.919988	0	0	0	1	4933438A12Rik	lincRNA	chr15	1013
ENSMUSG00000105490.1	0.277846	1.334	4.96736	0.268553	0.788274	NA	0	0	1.11139	0	0	0	1	0	4933438B17Rik	lincRNA	chr5	1745
ENSMUSG00000072893.12	166.152	0.476636	0.36372	1.31044	0.190045	0.999934	157.951	119.701	222.277	164.678	148	133	200	179	4933439C10Rik	processed_transcript	chr11	5616
ENSMUSG00000085184.9	69.6829	0.32206	0.538003	0.598621	0.549426	0.999934	54.4291	69.3004	66.6831	88.3188	51	77	60	96	4933439K11Rik	processed_transcript	chr1	2946
ENSMUSG00000042087.5	36.063	0.655224	0.734385	0.892209	0.372281	0.999934	29.8826	26.1001	47.7896	40.4795	28	29	43	44	4933440N22Rik	TEC	chr6	1953
ENSMUSG00000097282.1	8.05895	0.350018	1.50063	0.233248	0.815569	NA	5.33619	9.00005	7.7797	10.1199	5	10	7	11	5031415H12Rik	antisense	chr17	2481
ENSMUSG00000073147.3	551.136	0.525655	0.229033	2.29511	0.0217269	0.5804	448.24	455.403	641.27	659.631	420	506	577	717	5031425E22Rik	lincRNA	chr5	5142
ENSMUSG00000097885.7	41.3603	0.270841	0.686513	0.394517	0.693199	0.999934	36.2861	38.7002	44.4554	45.9994	34	43	40	50	5031434O11Rik	processed_transcript	chr3	3731
ENSMUSG00000036046.14	994.448	0.221153	0.195724	1.12992	0.258508	0.999934	900.748	934.205	1133.61	1009.23	844	1038	1020	1097	5031439G07Rik	protein_coding	chr15	9604
ENSMUSG00000096932.2	10.6595	0.433585	1.3696	0.316578	0.751564	NA	17.0758	3.60002	10.0025	11.9598	16	4	9	13	5033403F01Rik	antisense	chr13	1678
ENSMUSG00000106352.4	0.266809	-1.24165	4.96683	-0.249988	0.802597	NA	1.06724	0	0	0	1	0	0	0	5033403H07Rik	processed_transcript	chr5	1048
ENSMUSG00000102185.1	110.249	0.619606	0.49928	1.241	0.214606	0.999934	75.7738	86.4005	203.384	75.439	71	96	183	82	5033404E19Rik	transcribed_processed_pseudogene	chr1	1065
ENSMUSG00000113769.1	170.344	-0.0979305	0.361143	-0.271169	0.786261	0.999934	179.296	172.801	154.483	174.798	168	192	139	190	5033406O09Rik	lincRNA	chr12	1811
ENSMUSG00000097251.2	12.6196	1.45417	1.23948	1.17321	0.240712	NA	9.60514	4.50003	18.8936	17.4798	9	5	17	19	5033417F24Rik	antisense	chr1	1787
ENSMUSG00000112276.1	17.1811	-0.0516031	1.06087	-0.0486424	0.961204	NA	25.6137	10.8001	16.6708	15.6398	24	12	15	17	5033421B08Rik	antisense	chr12	1258
ENSMUSG00000081618.2	1.0475	-0.748155	4.18243	-0.17888	0.858032	NA	1.06724	0.900005	2.22277	0	1	1	2	0	5033423K11Rik	transcribed_processed_pseudogene	chr5	1474
ENSMUSG00000112981.1	0.266809	-1.24165	4.96683	-0.249988	0.802597	NA	1.06724	0	0	0	1	0	0	0	5033424D13Rik	TEC	chr12	648
ENSMUSG00000111468.1	122.01	0.529226	0.421698	1.25499	0.209482	0.999934	97.1186	101.701	162.262	126.958	91	113	146	138	5033425B01Rik	TEC	chr9	1303
ENSMUSG00000110625.1	0.277846	1.334	4.96736	0.268553	0.788274	NA	0	0	1.11139	0	0	0	1	0	5033426E14Rik	lincRNA	chr8	783
ENSMUSG00000038152.4	27.8442	0.335896	0.83016	0.404617	0.685759	0.999934	28.8154	20.7001	33.3416	28.5196	27	23	30	31	5033430I15Rik	lincRNA	chr13	952
ENSMUSG00000104030.1	175.873	-0.0914597	0.357881	-0.255559	0.798291	0.999934	168.623	194.401	176.71	163.758	158	216	159	178	5330406M23Rik	TEC	chr6	2094
ENSMUSG00000113927.1	2.42749	1.8588	2.71702	0.684135	0.49389	NA	1.06724	0.900005	2.22277	5.51993	1	1	2	6	5330409N07Rik	TEC	chr12	3518
ENSMUSG00000087455.7	0.225001	-1.24388	4.96736	-0.250411	0.802269	NA	0	0.900005	0	0	0	1	0	0	5330411J11Rik	processed_transcript	chr2	1813
ENSMUSG00000086822.2	1.00465	1.89022	4.26056	0.443656	0.657291	NA	1.06724	0	1.11139	1.83998	1	0	1	2	5330413P13Rik	lincRNA	chr2	6016
ENSMUSG00000040412.16	4707.71	-0.135712	0.176195	-0.770236	0.44116	0.999934	4838.85	4914.03	3576.44	5501.53	4534	5460	3218	5980	5330417C22Rik	protein_coding	chr3	6304
ENSMUSG00000085896.2	0.266809	-1.24165	4.96683	-0.249988	0.802597	NA	1.06724	0	0	0	1	0	0	0	5330429C05Rik	lincRNA	chr13	487
ENSMUSG00000114282.1	3.57827	-0.81836	2.2409	-0.365192	0.714968	NA	3.20171	5.40003	1.11139	4.59994	3	6	1	5	5330431K02Rik	TEC	chr13	1963
ENSMUSG00000087620.7	0.225001	-1.24388	4.96736	-0.250411	0.802269	NA	0	0.900005	0	0	0	1	0	0	5330434G04Rik	lincRNA	chrX	6494
ENSMUSG00000106855.1	0.229997	1.33177	4.96683	0.268132	0.788597	NA	0	0	0	0.919988	0	0	0	1	5330437M03Rik	TEC	chr6	4083
ENSMUSG00000052291.8	32.5886	-0.234803	0.771544	-0.304329	0.760877	0.999934	28.8154	41.4002	23.3391	36.7995	27	46	21	40	5330438D12Rik	processed_transcript	chr10	2517
ENSMUSG00000097827.1	6.44713	1.44734	1.69612	0.853323	0.39348	NA	4.26895	2.70002	7.7797	11.0399	4	3	7	12	5330439K02Rik	bidirectional_promoter_lncRNA	chr15	2312
ENSMUSG00000097699.2	5.78679	0.511956	1.76347	0.290312	0.771577	NA	3.20171	6.30004	4.44554	9.19988	3	7	4	10	5430400D12Rik	bidirectional_promoter_lncRNA	chr7	1690
ENSMUSG00000085776.8	1.91465	0.580943	2.96187	0.196141	0.8445	NA	1.06724	1.80001	1.11139	3.67995	1	2	1	4	5430402O13Rik	antisense	chr6	1007
ENSMUSG00000072763.2	59.6293	0.236652	0.596907	0.396463	0.691764	0.999934	66.1687	44.1002	55.5693	72.679	62	49	50	79	5430403G16Rik	protein_coding	chr5	3341
ENSMUSG00000085741.8	68.6504	0.0342635	0.540594	0.0633812	0.949463	0.999934	73.6394	62.1004	74.4628	64.3992	69	69	67	70	5430405H02Rik	processed_transcript	chr2	3851
ENSMUSG00000114419.1	21.7603	0.149739	0.938812	0.159499	0.873276	NA	25.6137	16.2001	22.2277	22.9997	24	18	20	25	5430414B19Rik	sense_intronic	chr14	750
ENSMUSG00000097772.7	166.236	-0.124619	0.369294	-0.337452	0.735776	0.999934	189.968	157.501	150.037	167.438	178	175	135	182	5430416N02Rik	lincRNA	chr5	4071
ENSMUSG00000006204.6	0.266809	-1.24165	4.96683	-0.249988	0.802597	NA	1.06724	0	0	0	1	0	0	0	5430419D17Rik	protein_coding	chr7	8572
ENSMUSG00000102808.1	81.6117	0.269257	0.503921	0.534325	0.593117	0.999934	71.5049	75.6004	74.4628	104.879	67	84	67	114	5430420F09Rik	TEC	chr3	1799
ENSMUSG00000110140.1	0.993613	0.0404242	4.68164	0.00863461	0.993111	NA	2.13447	0	0	1.83998	2	0	0	2	5430421F17Rik	lincRNA	chr8	3187
ENSMUSG00000085004.2	65.1658	-0.231154	0.557567	-0.414577	0.678452	0.999934	82.1773	59.4003	61.1262	57.9592	77	66	55	63	5430427M07Rik	antisense	chr12	1143
ENSMUSG00000025058.4	6.50923	1.69208	1.71311	0.987722	0.323289	NA	4.26895	1.80001	14.448	5.51993	4	2	13	6	5430427O19Rik	protein_coding	chrX	3754
ENSMUSG00000109953.1	3.47998	1.92097	2.29856	0.83573	0.403307	NA	2.13447	0.900005	4.44554	6.43992	2	1	4	7	5430430B14Rik	TEC	chr8	1630
ENSMUSG00000115270.1	0.822502	0.571405	4.8531	0.11774	0.906274	NA	1.06724	0	2.22277	0	1	0	2	0	5430430K15Rik	TEC	chr14	1544
ENSMUSG00000108780.1	135.684	-0.269821	0.397485	-0.67882	0.497252	0.999934	146.212	150.301	115.584	130.638	137	167	104	142	5430434F05Rik	TEC	chr6	3553
ENSMUSG00000110018.2	0.732845	1.31069	4.86178	0.26959	0.787476	NA	0	0.900005	1.11139	0.919988	0	1	1	1	5430437J10Rik	transcribed_processed_pseudogene	chr15	2001
ENSMUSG00000115548.1	3.40957	3.72019	2.61934	1.42028	0.155526	NA	1.06724	0	8.89109	3.67995	1	0	8	4	5430440P10Rik	lincRNA	chr14	1016
ENSMUSG00000102404.1	0.502848	0.045031	4.99583	0.00901372	0.992808	NA	0	0.900005	1.11139	0	0	1	1	0	5530400K19Rik	TEC	chr1	1916
ENSMUSG00000020703.3	0.454998	0.0444687	4.88765	0.00909818	0.992741	NA	0	0.900005	0	0.919988	0	1	0	1	5530401A14Rik	protein_coding	chr11	4548
ENSMUSG00000114723.1	0.822502	0.571405	4.8531	0.11774	0.906274	NA	1.06724	0	2.22277	0	1	0	2	0	5530402G07Rik	TEC	chr13	743
ENSMUSG00000087174.7	147.707	-0.0202823	0.385392	-0.0526276	0.958029	0.999934	148.346	148.501	131.144	162.838	139	165	118	177	5530601H04Rik	processed_transcript	chrX	9005
ENSMUSG00000099170.1	2.75818	3.5566	2.86133	1.24299	0.213872	NA	1.06724	0	4.44554	5.51993	1	0	4	6	5730403I07Rik	lincRNA	chr9	2033
ENSMUSG00000087424.1	13.7885	0.765958	1.17572	0.651482	0.514736	NA	8.5379	11.7001	21.1163	13.7998	8	13	19	15	5730405O15Rik	processed_transcript	chrX	1836
ENSMUSG00000104343.1	1.92568	2.2169	3.20155	0.692446	0.488657	NA	0	1.80001	2.22277	3.67995	0	2	2	4	5730408A14Rik	TEC	chr1	1824
ENSMUSG00000073755.4	10.5921	0.941296	1.32362	0.711152	0.47699	NA	6.40342	8.10005	12.2252	15.6398	6	9	11	17	5730409E04Rik	protein_coding	chr4	2891
ENSMUSG00000116506.1	8.20854	0.42567	1.52005	0.280036	0.77945	NA	4.26895	9.90006	12.2252	6.43992	4	11	11	7	5730414N17Rik	lincRNA	chr15	1439
ENSMUSG00000081793.1	0.225001	-1.24388	4.96736	-0.250411	0.802269	NA	0	0.900005	0	0	0	1	0	0	5730416F02Rik	processed_pseudogene	chrX	812
ENSMUSG00000099364.1	52.0291	0.23972	0.61616	0.389054	0.697236	0.999934	53.3619	42.3002	60.0148	52.4393	50	47	54	57	5730419F03Rik	lincRNA	chr1	2092
ENSMUSG00000097766.1	10.0054	0.137861	1.35337	0.101865	0.918864	NA	7.47066	11.7001	8.89109	11.9598	7	13	8	13	5730420D15Rik	bidirectional_promoter_lncRNA	chr10	1182
ENSMUSG00000097191.2	4.39577	-0.571385	1.99152	-0.28691	0.774182	NA	4.26895	6.30004	3.33416	3.67995	4	7	3	4	5730422E09Rik	lincRNA	chr5	1856
ENSMUSG00000085121.2	12.2204	0.303647	1.25795	0.241382	0.809259	NA	9.60514	10.8001	21.1163	7.3599	9	12	19	8	5730437C11Rik	lincRNA	chr3	242
ENSMUSG00000057181.15	246.918	0.0566813	0.310717	0.182421	0.855252	0.999934	265.742	219.601	251.173	251.157	249	244	226	273	5730455P16Rik	protein_coding	chr11	4842
ENSMUSG00000029089.8	246.42	-0.241257	0.311184	-0.775286	0.438171	0.999934	264.675	268.202	246.728	206.077	248	298	222	224	5730480H06Rik	protein_coding	chr5	9317
ENSMUSG00000107468.1	3.42431	2.20444	2.54975	0.864569	0.387275	NA	4.26895	0	6.66831	2.75996	4	0	6	3	5730507A11Rik	TEC	chr2	3371
ENSMUSG00000073197.9	52.093	-0.323272	0.619694	-0.521663	0.601905	0.999934	41.6223	73.8004	32.2302	60.7192	39	82	29	66	5730507C01Rik	protein_coding	chr12	2542
ENSMUSG00000116145.1	47.0562	0.204128	0.650178	0.313957	0.753554	0.999934	46.9584	40.5002	45.5668	55.1993	44	45	41	60	5730521K06Rik	TEC	chr15	1608
ENSMUSG00000032985.15	12.2027	-0.0286406	1.24448	-0.0230141	0.981639	NA	16.0086	9.00005	10.0025	13.7998	15	10	9	15	5730522E02Rik	protein_coding	chr11	5949
ENSMUSG00000056468.3	2.88248	1.4773	2.49452	0.592217	0.553705	NA	1.06724	1.80001	2.22277	6.43992	1	2	2	7	5730596B20Rik	protein_coding	chr6	3354
ENSMUSG00000110148.1	41.4151	0.532915	0.707516	0.753219	0.451318	0.999934	43.7567	25.2001	43.344	53.3593	41	28	39	58	5830408C22Rik	processed_transcript	chr8	4169
ENSMUSG00000105421.1	0.229997	1.33177	4.96683	0.268132	0.788597	NA	0	0	0	0.919988	0	0	0	1	5830411K02Rik	TEC	chr5	997
ENSMUSG00000106219.1	7.39844	-1.24396	1.58631	-0.784187	0.432931	NA	11.7396	9.00005	3.33416	5.51993	11	10	3	6	5830416I19Rik	lincRNA	chr5	2627
ENSMUSG00000078684.8	271.692	0.287476	0.297305	0.966941	0.333574	0.999934	221.985	268.202	285.626	310.956	208	298	257	338	5830417I10Rik	unprocessed_pseudogene	chr3	6190
ENSMUSG00000113035.1	83.4467	0.554489	0.495882	1.11819	0.263487	0.999934	68.3032	66.6004	107.804	91.0788	64	74	97	99	5830428M24Rik	processed_transcript	chr12	2790
ENSMUSG00000097471.8	2.0093	2.38243	3.20449	0.743464	0.457201	NA	2.13447	0	2.22277	3.67995	2	0	2	4	5830432E09Rik	antisense	chr7	6112
ENSMUSG00000084803.8	54.0746	0.347375	0.657095	0.528653	0.597046	0.999934	28.8154	70.2004	66.6831	50.5993	27	78	60	55	5830444B04Rik	processed_transcript	chr4	5410
ENSMUSG00000115007.1	24.8272	0.451323	0.879556	0.513125	0.607864	NA	17.0758	25.2001	26.6733	30.3596	16	28	24	33	5830448L01Rik	bidirectional_promoter_lncRNA	chr14	1299
ENSMUSG00000052658.5	8.30868	-0.0704077	1.48529	-0.0474034	0.962192	NA	8.5379	8.10005	5.55693	11.0399	8	9	5	12	5830454E08Rik	lincRNA	chr9	744
ENSMUSG00000091102.1	0.684995	0.570179	4.85336	0.117481	0.906479	NA	0	0.900005	0	1.83998	0	1	0	2	5830462I19Rik	TEC	chr9	3383
ENSMUSG00000110972.1	36.5429	-0.456591	0.752691	-0.606612	0.544108	0.999934	49.0929	35.1002	23.3391	38.6395	46	39	21	42	5830462O15Rik	TEC	chr9	1655
ENSMUSG00000098322.1	4.50541	0.76476	1.99761	0.382837	0.701841	NA	5.33619	1.80001	4.44554	6.43992	5	2	4	7	5830468F06Rik	antisense	chr8	1104
ENSMUSG00000070690.7	0.496806	0.0450723	4.9968	0.00902022	0.992803	NA	1.06724	0	0	0.919988	1	0	0	1	5830473C10Rik	protein_coding	chr5	2919
ENSMUSG00000104830.1	7.6386	0.0441246	1.55437	0.0283874	0.977353	NA	4.26895	10.8001	4.44554	11.0399	4	12	4	12	5830487J09Rik	processed_transcript	chr5	2243
ENSMUSG00000046463.5	3.87005	0.740101	2.2627	0.327087	0.743602	NA	4.26895	0.900005	1.11139	9.19988	4	1	1	10	5930403N24Rik	processed_transcript	chr10	4924
ENSMUSG00000072591.10	1.26042	-0.261073	4.22428	-0.061803	0.95072	NA	3.20171	0	0	1.83998	3	0	0	2	5930412G12Rik	lincRNA	chr5	3394
ENSMUSG00000107201.1	15.9802	-0.0644639	1.08863	-0.0592158	0.95278	NA	17.0758	15.3001	12.2252	19.3197	16	17	11	21	5930420M18Rik	TEC	chr5	2281
ENSMUSG00000048544.8	1.0057	0.0450973	4.65769	0.00968233	0.992275	NA	0	1.80001	2.22277	0	0	2	2	0	5930422O12Rik	protein_coding	chr8	840
ENSMUSG00000106951.1	46.1739	0.771618	0.658137	1.17243	0.241025	0.999934	26.6809	42.3002	52.2351	63.4792	25	47	47	69	5930430L01Rik	lincRNA	chr5	3994
ENSMUSG00000114590.1	0.68	-0.481265	4.8531	-0.0991665	0.921006	NA	0	1.80001	0	0.919988	0	2	0	1	5930438M14Rik	lincRNA	chr13	2439
ENSMUSG00000105326.1	42.954	-0.376142	0.690967	-0.54437	0.586187	0.999934	54.4291	42.3002	30.0074	45.0794	51	47	27	49	6030400A10Rik	TEC	chr5	1212
ENSMUSG00000100301.6	0.225001	-1.24388	4.96736	-0.250411	0.802269	NA	0	0.900005	0	0	0	1	0	0	6030407O03Rik	lincRNA	chr1	2442
ENSMUSG00000075408.5	1.39681	-2.16371	3.70023	-0.584752	0.558715	NA	1.06724	3.60002	0	0.919988	1	4	0	1	6030408B16Rik	protein_coding	chr15	1967
ENSMUSG00000113056.1	2.77501	-0.403985	2.50914	-0.161005	0.872089	NA	2.13447	3.60002	4.44554	0.919988	2	4	4	1	6030440G07Rik	lincRNA	chr12	1090
ENSMUSG00000097760.2	11.1978	1.14654	1.29448	0.885712	0.375773	NA	8.5379	5.40003	18.8936	11.9598	8	6	17	13	6030442K20Rik	processed_transcript	chr1	2222
ENSMUSG00000097207.7	51.635	0.15256	0.625404	0.243938	0.807279	0.999934	45.8912	51.3003	63.349	45.9994	43	57	57	50	6030443J06Rik	lincRNA	chr5	7595
ENSMUSG00000066178.2	10.4555	0.304994	1.33221	0.228938	0.818917	NA	11.7396	7.20004	10.0025	12.8798	11	8	9	14	6030445D17Rik	protein_coding	chr4	1728
ENSMUSG00000022195.7	605.188	-0.0377632	0.222918	-0.169404	0.865479	0.999934	594.451	631.804	605.705	588.792	557	702	545	640	6030458C11Rik	protein_coding	chr15	6007
ENSMUSG00000103822.1	5.09896	0.293866	1.85922	0.158058	0.874411	NA	5.33619	3.60002	7.7797	3.67995	5	4	7	4	6030460B20Rik	TEC	chr1	1058
ENSMUSG00000110599.1	0.277846	1.334	4.96736	0.268553	0.788274	NA	0	0	1.11139	0	0	0	1	0	6030466F02Rik	lincRNA	chr8	1434
ENSMUSG00000097577.2	15.8199	-0.413346	1.08678	-0.380339	0.703694	NA	18.143	18.0001	13.3366	13.7998	17	20	12	15	6230400D17Rik	antisense	chr14	2472
ENSMUSG00000018451.6	0.496806	0.0450723	4.9968	0.00902022	0.992803	NA	1.06724	0	0	0.919988	1	0	0	1	6330403K07Rik	lincRNA	chr11	1494
ENSMUSG00000075585.3	135.689	0.950814	0.401377	2.36888	0.017842	0.531569	94.9841	89.1005	202.272	156.398	89	99	182	170	6330403L08Rik	antisense	chr5	5522
ENSMUSG00000097912.1	0.225001	-1.24388	4.96736	-0.250411	0.802269	NA	0	0.900005	0	0	0	1	0	0	6330403N20Rik	lincRNA	chr7	1189
ENSMUSG00000105960.1	0.225001	-1.24388	4.96736	-0.250411	0.802269	NA	0	0.900005	0	0	0	1	0	0	6330410L21Rik	antisense	chr3	3871
ENSMUSG00000108077.1	1.45965	0.861978	3.33419	0.258527	0.796	NA	1.06724	0.900005	1.11139	2.75996	1	1	1	3	6330415B21Rik	TEC	chr6	2200
ENSMUSG00000085227.1	27.7878	0.720624	0.841046	0.856819	0.391545	0.999934	17.0758	25.2001	36.6757	32.1996	16	28	33	35	6330418K02Rik	antisense	chr5	1339
ENSMUSG00000107414.1	1.34138	3.57398	4.10858	0.869884	0.384364	NA	0	0	4.44554	0.919988	0	0	4	1	6330419E04Rik	TEC	chr6	1263
ENSMUSG00000110575.1	3.81542	0.362865	2.13754	0.169758	0.8652	NA	5.33619	1.80001	4.44554	3.67995	5	2	4	4	6330537M06Rik	TEC	chr8	1642
ENSMUSG00000045327.7	27.8149	0.13568	0.830937	0.163286	0.870294	0.999934	28.8154	24.3001	27.7846	30.3596	27	27	25	33	6330549D23Rik	transcribed_processed_pseudogene	chr3	3228
ENSMUSG00000093424.3	0.999654	0.0450804	3.90966	0.0115305	0.9908	NA	1.06724	0.900005	1.11139	0.919988	1	1	1	1	6330562C20Rik	antisense	chr3	1118
ENSMUSG00000115821.1	0.225001	-1.24388	4.96736	-0.250411	0.802269	NA	0	0.900005	0	0	0	1	0	0	6330576A10Rik	lincRNA	chr14	1893
ENSMUSG00000053545.6	0.225001	-1.24388	4.96736	-0.250411	0.802269	NA	0	0.900005	0	0	0	1	0	0	6430503K07Rik	antisense	chr2	476
ENSMUSG00000102555.1	159.231	0.775316	0.372566	2.08102	0.0374321	0.756092	120.598	114.301	192.27	209.757	113	127	173	228	6430511E19Rik	TEC	chr7	3835
ENSMUSG00000031824.15	1292.43	0.0549209	0.181828	0.302049	0.762615	0.999934	1227.32	1308.61	1334.77	1299.02	1150	1454	1201	1412	6430548M08Rik	protein_coding	chr8	6626
ENSMUSG00000074646.10	36.0578	0.198135	0.740934	0.267413	0.789151	0.999934	33.0844	33.3002	30.0074	47.8394	31	37	27	52	6430550D23Rik	protein_coding	chr2	4994
ENSMUSG00000097828.2	0.277846	1.334	4.96736	0.268553	0.788274	NA	0	0	1.11139	0	0	0	1	0	6430562O15Rik	processed_transcript	chr13	5975
ENSMUSG00000037977.6	2.6325	-0.324265	2.57646	-0.125857	0.899845	NA	1.06724	5.40003	2.22277	1.83998	1	6	2	2	6430571L13Rik	protein_coding	chr9	2912
ENSMUSG00000102545.1	18.1164	0.838009	1.02521	0.8174	0.4137	NA	10.6724	15.3001	18.8936	27.5996	10	17	17	30	6430573P05Rik	lincRNA	chr3	2610
ENSMUSG00000097583.2	74.2712	0.341385	0.52269	0.65313	0.513672	0.999934	66.1687	64.8004	77.797	88.3188	62	72	70	96	6430590A07Rik	processed_transcript	chr3	4487
ENSMUSG00000034185.9	0.266809	-1.24165	4.96683	-0.249988	0.802597	NA	1.06724	0	0	0	1	0	0	0	6430628N08Rik	protein_coding	chr4	1605
ENSMUSG00000085427.7	14.2165	0.42402	1.15001	0.368709	0.712344	NA	10.6724	13.5001	18.8936	13.7998	10	15	17	15	6430710C18Rik	lincRNA	chr2	2270
ENSMUSG00000110127.1	6.26861	-0.12454	1.69355	-0.073538	0.941378	NA	4.26895	9.00005	4.44554	7.3599	4	10	4	8	6430710M23Rik	TEC	chr8	1191
ENSMUSG00000091947.1	0.277846	1.334	4.96736	0.268553	0.788274	NA	0	0	1.11139	0	0	0	1	0	6530401F13Rik	processed_transcript	chr12	1090
ENSMUSG00000079499.9	2.71507	-0.405422	2.52933	-0.160288	0.872654	NA	4.26895	1.80001	1.11139	3.67995	4	2	1	4	6530402F18Rik	processed_transcript	chr2	5511
ENSMUSG00000043340.3	0.229997	1.33177	4.96683	0.268132	0.788597	NA	0	0	0	0.919988	0	0	0	1	6530409C15Rik	antisense	chr6	2013
ENSMUSG00000111856.1	2.7419	-2.11661	2.57842	-0.820894	0.411707	NA	5.33619	3.60002	1.11139	0.919988	5	4	1	1	6530413G14Rik	processed_transcript	chr9	1897
ENSMUSG00000109111.1	0.454998	0.0444687	4.88765	0.00909818	0.992741	NA	0	0.900005	0	0.919988	0	1	0	1	6530437J22Rik	antisense	chr7	892
ENSMUSG00000097375.2	271.715	0.362524	0.29642	1.22301	0.221326	0.999934	251.868	223.201	331.193	280.596	236	248	298	305	6720427I07Rik	lincRNA	chr13	2300
ENSMUSG00000103432.1	113.657	0.0224422	0.433428	0.0517784	0.958705	0.999934	116.329	108.901	103.359	126.038	109	121	93	137	6720464F23Rik	TEC	chr1	3496
ENSMUSG00000107009.1	23.3361	-0.0214326	0.920733	-0.0232777	0.981429	NA	25.6137	20.7001	16.6708	30.3596	24	23	15	33	6720475M21Rik	TEC	chr5	2753
ENSMUSG00000106553.1	9.02863	-0.514474	1.45224	-0.354262	0.723143	NA	6.40342	15.3001	8.89109	5.51993	6	17	8	6	6720482G16Rik	TEC	chr3	1192
ENSMUSG00000097934.1	0.822502	0.571405	4.8531	0.11774	0.906274	NA	1.06724	0	2.22277	0	1	0	2	0	6720483E21Rik	lincRNA	chr1	1120
ENSMUSG00000072066.7	39.4519	0.475423	0.703718	0.675587	0.499303	0.999934	30.9499	35.1002	46.6782	45.0794	29	39	42	49	6720489N17Rik	protein_coding	chr13	2701
ENSMUSG00000103706.1	46.2878	-0.133646	0.662234	-0.201811	0.840064	0.999934	51.2274	45.0003	35.5643	53.3593	48	50	32	58	6820402A03Rik	TEC	chr1	2654
ENSMUSG00000032680.11	2.69034	0.574301	2.52702	0.227264	0.820218	NA	1.06724	3.60002	3.33416	2.75996	1	4	3	3	6820408C15Rik	protein_coding	chr2	1787
ENSMUSG00000071796.13	133.699	-0.181657	0.399247	-0.455001	0.649109	0.999934	148.346	135.901	130.032	120.518	139	151	117	131	6820431F20Rik	transcribed_unprocessed_pseudogene	chr8	5006
ENSMUSG00000116338.1	0.496806	0.0450723	4.9968	0.00902022	0.992803	NA	1.06724	0	0	0.919988	1	0	0	1	7530414M10Rik	lincRNA	chr15	1684
ENSMUSG00000103441.1	56.695	1.71105	0.620722	2.75655	0.00584143	0.281901	27.7482	22.5001	122.252	54.2793	26	25	110	59	7530428D23Rik	transcribed_processed_pseudogene	chr3	975
ENSMUSG00000102674.1	0.229997	1.33177	4.96683	0.268132	0.788597	NA	0	0	0	0.919988	0	0	0	1	8030442B05Rik	lincRNA	chr2	1035
ENSMUSG00000103563.1	3.52154	-0.748303	2.22465	-0.336369	0.736593	NA	6.40342	2.70002	2.22277	2.75996	6	3	2	3	8030445P17Rik	TEC	chr1	2741
ENSMUSG00000073821.11	3.73464	0.285294	2.26425	0.126	0.899732	NA	1.06724	5.40003	1.11139	7.3599	1	6	1	8	8030451A03Rik	processed_transcript	chr4	4083
ENSMUSG00000110507.1	0.774653	1.30561	4.75965	0.274308	0.783848	NA	1.06724	0	1.11139	0.919988	1	0	1	1	8030455M16Rik	lincRNA	chr8	902
ENSMUSG00000047466.9	449.901	-0.0320929	0.249418	-0.128671	0.897618	0.999934	422.626	487.803	456.78	432.394	396	542	411	470	8030462N17Rik	protein_coding	chr18	3418
ENSMUSG00000113432.1	40.8032	-0.368775	0.718263	-0.513426	0.607653	0.999934	34.1516	58.5003	41.1213	29.4396	32	65	37	32	8430406P12Rik	TEC	chr13	1070
ENSMUSG00000105095.1	12.9665	0.271035	1.19777	0.226283	0.820981	NA	10.6724	12.6001	11.1139	17.4798	10	14	10	19	8430422M14Rik	TEC	chr3	822
ENSMUSG00000115970.1	1.72646	0.349021	3.08167	0.113257	0.909827	NA	2.13447	0.900005	1.11139	2.75996	2	1	1	3	8430426J06Rik	lincRNA	chr15	1712
ENSMUSG00000034587.8	41.2605	0.0742695	0.687404	0.108043	0.913961	0.999934	42.6895	37.8002	42.2327	42.3194	40	42	38	46	8430429K09Rik	processed_transcript	chr11	2649
ENSMUSG00000041878.3	2.74585	-1.45931	2.81655	-0.518121	0.604374	NA	6.40342	0.900005	0	3.67995	6	1	0	4	8430432A02Rik	antisense	chr1	1248
ENSMUSG00000116953.1	18.5644	0.192282	1.01037	0.190309	0.849067	NA	14.9413	19.8001	21.1163	18.3998	14	22	19	20	9030025P20Rik	protein_coding	chr17	3999
ENSMUSG00000086449.1	1.36716	0.367817	4.03528	0.0911504	0.927373	NA	2.13447	0	3.33416	0	2	0	3	0	9030204H09Rik	antisense	chr2	653
ENSMUSG00000097343.2	42.4032	-0.330589	0.679155	-0.486766	0.626424	0.999934	50.1602	44.1002	42.2327	33.1196	47	49	38	36	9030407P20Rik	processed_transcript	chr7	2398
ENSMUSG00000107005.1	11.1844	0.113203	1.27992	0.0884453	0.929523	NA	10.6724	10.8001	12.2252	11.0399	10	12	11	12	9030607J07Rik	TEC	chr5	1622
ENSMUSG00000045008.1	2.75189	-0.789521	2.52118	-0.313155	0.754163	NA	5.33619	1.80001	1.11139	2.75996	5	2	1	3	9030612E09Rik	protein_coding	chr10	1859
ENSMUSG00000097691.1	27.0292	-0.645412	0.887495	-0.727229	0.467086	0.999934	20.2775	40.5002	7.7797	39.5595	19	45	7	43	9030616G12Rik	lincRNA	chr10	644
ENSMUSG00000053168.6	191.132	-2.19945	0.376724	-5.83836	5.27164e-09	2.44002e-06	249.734	379.802	73.3515	61.6392	234	422	66	67	9030619P08Rik	transcribed_unprocessed_pseudogene	chr15	935
ENSMUSG00000086141.7	359.783	0.476253	0.276986	1.71941	0.085539	0.999934	271.078	331.202	446.777	390.075	254	368	402	424	9030622O22Rik	lincRNA	chr2	1682
ENSMUSG00000073158.4	15.8373	0.479892	1.09206	0.439437	0.660345	NA	17.0758	9.90006	18.8936	17.4798	16	11	17	19	9030624G23Rik	protein_coding	chr12	2245
ENSMUSG00000115837.1	45.077	0.135929	0.665895	0.20413	0.838252	0.999934	35.2188	51.3003	47.7896	45.9994	33	57	43	50	9130002K18Rik	TEC	chr15	3126
ENSMUSG00000054951.3	421.488	-0.73057	0.287206	-2.54371	0.0109682	0.400416	584.846	463.503	256.73	380.875	548	515	231	414	9130008F23Rik	protein_coding	chr17	2161
ENSMUSG00000108950.1	3.75758	-0.531777	2.13794	-0.248734	0.803567	NA	5.33619	3.60002	3.33416	2.75996	5	4	3	3	9130015G15Rik	antisense	chr7	2133
ENSMUSG00000055134.5	151.828	1.14392	0.384813	2.97266	0.00295233	0.181165	93.9169	94.5005	183.379	235.517	88	105	165	256	9130017K11Rik	processed_transcript	chr11	4573
ENSMUSG00000030823.6	146.712	-0.0898729	0.385182	-0.233326	0.815508	0.999934	146.212	155.701	126.698	158.238	137	173	114	172	9130019O22Rik	protein_coding	chr7	3878
ENSMUSG00000073067.10	1.2725	-1.38027	3.86226	-0.357375	0.720811	NA	1.06724	1.80001	2.22277	0	1	2	2	0	9130019P16Rik	processed_transcript	chr6	5566
ENSMUSG00000062944.4	209.713	0.158549	0.329048	0.481842	0.629918	0.999934	202.775	193.501	230.057	212.517	190	215	207	231	9130023H24Rik	protein_coding	chr7	3574
ENSMUSG00000087022.4	148.67	0.212537	0.401357	0.529545	0.596428	0.999934	145.144	127.801	126.698	195.037	136	142	114	212	9130024F11Rik	processed_transcript	chr1	5779
ENSMUSG00000086474.2	20.0725	0.550111	0.985209	0.55837	0.576592	NA	16.0086	15.3001	33.3416	15.6398	15	17	30	17	9130204K15Rik	lincRNA	chr11	1462
ENSMUSG00000086513.3	10235.9	0.280467	0.163001	1.72064	0.0853157	0.999934	9717.2	8712.95	9895.78	12617.6	9105	9681	8904	13715	9130208D14Rik	unprocessed_pseudogene	chr7	7293
ENSMUSG00000097386.1	0.544656	0.0456629	4.88765	0.00934252	0.992546	NA	1.06724	0	1.11139	0	1	0	1	0	9130213A22Rik	protein_coding	chr11	1581
ENSMUSG00000109237.1	56.0461	0.048419	0.597542	0.0810302	0.935418	0.999934	65.1015	45.9003	58.9034	54.2793	61	51	53	59	9130214F15Rik	TEC	chr8	1653
ENSMUSG00000090330.2	109.337	0.0518403	0.436682	0.118714	0.905502	0.999934	112.06	102.601	117.807	104.879	105	114	106	114	9130221H12Rik	antisense	chr7	1577
ENSMUSG00000099950.1	23.4497	-0.141802	0.90648	-0.156431	0.875693	NA	29.8826	19.8001	21.1163	22.9997	28	22	19	25	9130227L01Rik	lincRNA	chr1	2345
ENSMUSG00000054598.13	120.822	0.677212	0.420243	1.61148	0.107076	0.999934	85.379	99.9006	127.809	170.198	80	111	115	185	9130230L23Rik	protein_coding	chr5	7830
ENSMUSG00000092626.1	21.5058	0.454668	0.94434	0.481466	0.630185	NA	14.9413	21.6001	25.5619	23.9197	14	24	23	26	9130230N09Rik	processed_transcript	chr11	663
ENSMUSG00000101892.1	87.7416	0.254222	0.5135	0.495077	0.620546	0.999934	61.8998	99.0006	110.027	80.0389	58	110	99	87	9130401M01Rik	protein_coding	chr15	2666
ENSMUSG00000085323.1	48.3585	-0.279423	0.644636	-0.433458	0.664682	0.999934	49.0929	55.8003	33.3416	55.1993	46	62	30	60	9130410C08Rik	antisense	chr4	1088
ENSMUSG00000105851.1	14.7194	-0.919919	1.1441	-0.804052	0.421367	NA	24.5465	14.4001	8.89109	11.0399	23	16	8	12	9130604C24Rik	lincRNA	chr5	956
ENSMUSG00000072753.12	0.993613	0.0404242	4.68164	0.00863461	0.993111	NA	2.13447	0	0	1.83998	2	0	0	2	9230020A06Rik	lincRNA	chr11	3784
ENSMUSG00000112398.1	1.03647	-1.66405	4.19699	-0.396486	0.691747	NA	2.13447	0.900005	1.11139	0	2	1	1	0	9230102K24Rik	lincRNA	chr10	1451
ENSMUSG00000097100.1	0.225001	-1.24388	4.96736	-0.250411	0.802269	NA	0	0.900005	0	0	0	1	0	0	9230104M06Rik	antisense	chr12	1963
ENSMUSG00000090191.1	122.198	0.561142	0.41866	1.34033	0.180139	0.999934	100.32	96.3005	163.374	128.798	94	107	147	140	9230105E05Rik	antisense	chr10	2250
ENSMUSG00000087624.1	4.94759	-0.224079	1.91773	-0.116846	0.906982	NA	7.47066	2.70002	7.7797	1.83998	7	3	7	2	9230111E07Rik	lincRNA	chr2	811
ENSMUSG00000021797.2	1.24069	2.29044	3.8837	0.589757	0.555354	NA	0	0.900005	2.22277	1.83998	0	1	2	2	9230112D13Rik	protein_coding	chr14	778
ENSMUSG00000070461.3	235.134	-0.0887139	0.322115	-0.275411	0.783001	0.999934	215.582	270.002	237.837	217.117	202	300	214	236	9230112E08Rik	sense_overlapping	chr2	3352
ENSMUSG00000111761.1	17.6553	-0.223627	1.03394	-0.216286	0.828765	NA	21.3447	16.2001	21.1163	11.9598	20	18	19	13	9230112J17Rik	lincRNA	chr9	2448
ENSMUSG00000078934.4	0.229997	1.33177	4.96683	0.268132	0.788597	NA	0	0	0	0.919988	0	0	0	1	9230113P08Rik	protein_coding	chr9	1991
ENSMUSG00000105385.1	1.45465	0.0444458	3.31107	0.0134234	0.98929	NA	1.06724	1.80001	1.11139	1.83998	1	2	1	2	9230114J08Rik	antisense	chr3	350
ENSMUSG00000097145.5	26.7462	0.510171	0.846614	0.602602	0.546774	0.999934	22.412	21.6001	34.453	28.5196	21	24	31	31	9230114K14Rik	processed_transcript	chr5	2762
ENSMUSG00000112489.1	66.6525	0.0151009	0.549559	0.0274783	0.978078	0.999934	62.967	69.3004	58.9034	75.439	59	77	53	82	9230116L04Rik	lincRNA	chr12	2019
ENSMUSG00000097403.2	6.2479	1.23058	1.746	0.704804	0.480932	NA	6.40342	1.80001	6.66831	10.1199	6	2	6	11	9230116N13Rik	processed_transcript	chr1	3589
ENSMUSG00000091050.1	21.679	0.332565	0.950442	0.349906	0.726409	NA	13.8741	25.2001	25.5619	22.0797	13	28	23	24	9330020H09Rik	antisense	chr15	2147
ENSMUSG00000107879.1	0.555693	1.90274	4.93253	0.385753	0.69968	NA	0	0	2.22277	0	0	0	2	0	9330102E08Rik	lincRNA	chr6	3843
ENSMUSG00000097842.2	5.4743	0.838914	1.80002	0.466059	0.641174	NA	4.26895	3.60002	6.66831	7.3599	4	4	6	8	9330104G04Rik	lincRNA	chr7	3510
ENSMUSG00000097098.8	0.491811	-2.39757	4.89228	-0.490072	0.624083	NA	1.06724	0.900005	0	0	1	1	0	0	9330111N05Rik	antisense	chr13	5297
ENSMUSG00000108242.1	0.266809	-1.24165	4.96683	-0.249988	0.802597	NA	1.06724	0	0	0	1	0	0	0	9330118I20Rik	processed_transcript	chr6	5506
ENSMUSG00000103502.1	7.30791	-0.464398	1.61913	-0.286819	0.774251	NA	4.26895	11.7001	2.22277	11.0399	4	13	2	12	9330121J05Rik	antisense	chr3	3009
ENSMUSG00000097781.1	6.4311	0.909552	1.68088	0.541116	0.588428	NA	5.33619	3.60002	6.66831	10.1199	5	4	6	11	9330136K24Rik	lincRNA	chr17	2478
ENSMUSG00000097061.2	156.742	0.0722555	0.374445	0.192967	0.846985	0.999934	146.212	159.301	167.819	153.638	137	177	151	167	9330151L19Rik	bidirectional_promoter_lncRNA	chr12	2545
ENSMUSG00000056031.13	1.4068	-0.857203	3.67157	-0.23347	0.815396	NA	1.06724	1.80001	0	2.75996	1	2	0	3	9330154J02Rik	processed_transcript	chr9	4057
ENSMUSG00000047807.10	0.277846	1.334	4.96736	0.268553	0.788274	NA	0	0	1.11139	0	0	0	1	0	9330154K18Rik	antisense	chr15	2104
ENSMUSG00000073154.10	0.229997	1.33177	4.96683	0.268132	0.788597	NA	0	0	0	0.919988	0	0	0	1	9330158H04Rik	lincRNA	chr6	9180
ENSMUSG00000004360.9	0.277846	1.334	4.96736	0.268553	0.788274	NA	0	0	1.11139	0	0	0	1	0	9330159F19Rik	protein_coding	chr10	5767
ENSMUSG00000097177.8	63.3719	0.432451	0.563738	0.767114	0.443013	0.999934	57.6308	50.4003	70.0173	75.439	54	56	63	82	9330159M07Rik	processed_transcript	chr9	5332
ENSMUSG00000113695.1	5.85912	-1.61154	1.8346	-0.878414	0.379719	NA	9.60514	7.20004	1.11139	5.51993	9	8	1	6	9330159N22Rik	TEC	chr13	1031
ENSMUSG00000072809.2	19.3235	-0.277708	0.993915	-0.279408	0.779932	NA	20.2775	21.6001	13.3366	22.0797	19	24	12	24	9330160F10Rik	antisense	chr11	2766
ENSMUSG00000055271.4	5.47904	-0.489051	1.7946	-0.272513	0.785227	NA	7.47066	5.40003	4.44554	4.59994	7	6	4	5	9330161L09Rik	protein_coding	chr12	999
ENSMUSG00000086448.1	117.704	-0.222092	0.427151	-0.519937	0.603108	0.999934	139.808	114.301	104.47	112.239	131	127	94	122	9330162012Rik	bidirectional_promoter_lncRNA	chr13	3836
ENSMUSG00000109536.1	24.6269	0.374613	0.880546	0.425432	0.670522	NA	20.2775	22.5001	24.4505	31.2796	19	25	22	34	9330162G02Rik	TEC	chr7	30942
ENSMUSG00000097194.2	9.981	-1.1808	1.43819	-0.821035	0.411626	NA	14.9413	10.8001	2.22277	11.9598	14	12	2	13	9330175E14Rik	lincRNA	chr8	5938
ENSMUSG00000097166.1	2.04112	0.221161	2.85196	0.0775468	0.938189	NA	3.20171	0.900005	2.22277	1.83998	3	1	2	2	9330179D12Rik	antisense	chr6	1486
ENSMUSG00000056004.16	24.6604	1.09493	0.890983	1.2289	0.219109	NA	18.143	13.5001	31.1188	35.8795	17	15	28	39	9330182L06Rik	protein_coding	chr5	7918
ENSMUSG00000094112.2	6.21793	-0.294491	1.69126	-0.174125	0.861767	NA	6.40342	7.20004	6.66831	4.59994	6	8	6	5	9330182O14Rik	protein_coding	chr15	2053
ENSMUSG00000115149.1	41.9133	-0.409819	0.684031	-0.599123	0.549091	0.999934	58.698	36.9002	44.4554	27.5996	55	41	40	30	9330188P03Rik	processed_transcript	chr14	4583
ENSMUSG00000104904.1	0.491811	-2.39757	4.89228	-0.490072	0.624083	NA	1.06724	0.900005	0	0	1	1	0	0	9330198I05Rik	lincRNA	chr5	1095
ENSMUSG00000062704.3	4.02069	0.823282	2.09329	0.393296	0.694101	NA	2.13447	3.60002	6.66831	3.67995	2	4	6	4	9430002A10Rik	lincRNA	chr8	475
ENSMUSG00000106913.1	0.229997	1.33177	4.96683	0.268132	0.788597	NA	0	0	0	0.919988	0	0	0	1	9430007M09Rik	TEC	chr5	804
ENSMUSG00000059939.13	181.644	-0.0334542	0.351058	-0.0952954	0.92408	0.999934	166.489	201.601	174.488	183.998	156	224	157	200	9430015G10Rik	protein_coding	chr4	3695
ENSMUSG00000054457.5	1.66862	-1.95023	3.40232	-0.573206	0.566505	NA	2.13447	2.70002	0	1.83998	2	3	0	2	9430021M05Rik	processed_transcript	chr2	1201
ENSMUSG00000085463.1	0.459994	1.89962	4.93227	0.385141	0.700133	NA	0	0	0	1.83998	0	0	0	2	9430024E24Rik	lincRNA	chr2	713
ENSMUSG00000055216.3	0.727849	-0.50547	4.88184	-0.103541	0.917534	NA	0	1.80001	1.11139	0	0	2	1	0	9430025C20Rik	pseudogene	chr4	2115
ENSMUSG00000113341.1	18.8585	-0.407408	1.00248	-0.4064	0.684449	NA	20.2775	22.5001	13.3366	19.3197	19	25	12	21	9430031K09Rik	TEC	chr12	925
ENSMUSG00000102964.1	68.8813	-0.52999	0.55369	-0.957197	0.338468	0.999934	85.379	76.5004	45.5668	68.0791	80	85	41	74	9430034N14Rik	TEC	chr1	3785
ENSMUSG00000097073.7	39.996	0.336008	0.701662	0.478875	0.632028	0.999934	36.2861	34.2002	38.8985	50.5993	34	38	35	55	9430037G07Rik	lincRNA	chr9	3767
ENSMUSG00000102246.1	2.59681	0.732994	2.57939	0.284174	0.776277	NA	3.20171	0.900005	4.44554	1.83998	3	1	4	2	9430037O13Rik	TEC	chr1	1008
ENSMUSG00000040139.14	190.32	0.205435	0.342796	0.599291	0.548979	0.999934	199.573	153.901	231.168	176.638	187	171	208	192	9430038I01Rik	protein_coding	chr7	5752
ENSMUSG00000086155.7	1.40181	-1.423	3.67023	-0.387713	0.698228	NA	1.06724	2.70002	0	1.83998	1	3	0	2	9430041J12Rik	antisense	chr7	2737
ENSMUSG00000100632.1	38.3077	0.596592	0.720859	0.827612	0.40789	0.999934	35.2188	26.1001	42.2327	49.6793	33	29	38	54	9430060I03Rik	antisense	chr1	1689
ENSMUSG00000108402.1	0.555693	1.90274	4.93253	0.385753	0.69968	NA	0	0	2.22277	0	0	0	2	0	9430064I24Rik	TEC	chr7	2669
ENSMUSG00000097360.8	9.74465	0.335272	1.38359	0.24232	0.808532	NA	5.33619	12.6001	10.0025	11.0399	5	14	9	12	9430065F17Rik	antisense	chr13	2571
ENSMUSG00000112765.1	0.732845	1.31069	4.86178	0.26959	0.787476	NA	0	0.900005	1.11139	0.919988	0	1	1	1	9430078K24Rik	lincRNA	chr12	1454
ENSMUSG00000111088.1	13.9011	0.122101	1.20873	0.101016	0.919537	NA	9.60514	15.3001	23.3391	7.3599	9	17	21	8	9430081H08Rik	TEC	chr9	818
ENSMUSG00000106164.1	0.502848	0.045031	4.99583	0.00901372	0.992808	NA	0	0.900005	1.11139	0	0	1	1	0	9430085M18Rik	lincRNA	chr5	1178
ENSMUSG00000104971.1	0.533619	-1.8095	4.93228	-0.366869	0.713717	NA	2.13447	0	0	0	2	0	0	0	9430087B13Rik	TEC	chr5	1085
ENSMUSG00000103522.1	24.7177	0.481223	0.883325	0.544786	0.585901	NA	24.5465	17.1001	27.7846	29.4396	23	19	25	32	9430087J23Rik	TEC	chr1	1152
ENSMUSG00000084808.7	29.2181	0.464292	0.818338	0.56736	0.57047	0.999934	29.8826	19.8001	32.2302	34.9595	28	22	29	38	9430091E24Rik	processed_transcript	chr8	1211
ENSMUSG00000102205.1	1.43862	-2.45932	3.64655	-0.674424	0.500042	NA	2.13447	2.70002	0	0.919988	2	3	0	1	9430092D12Rik	TEC	chr16	1274
ENSMUSG00000085369.1	4.66604	0.861628	1.97181	0.436973	0.662131	NA	3.20171	2.70002	10.0025	2.75996	3	3	9	3	9430093N23Rik	lincRNA	chr2	515
ENSMUSG00000097605.1	0.450003	-1.81261	4.93254	-0.367481	0.71326	NA	0	1.80001	0	0	0	2	0	0	9430098F02Rik	lincRNA	chr11	2986
ENSMUSG00000102267.1	0.266809	-1.24165	4.96683	-0.249988	0.802597	NA	1.06724	0	0	0	1	0	0	0	9530003O04Rik	TEC	chr16	908
ENSMUSG00000112150.1	58.8128	0.558642	0.584735	0.955376	0.339388	0.999934	50.1602	45.0003	65.5718	74.519	47	50	59	81	9530018F02Rik	bidirectional_promoter_lncRNA	chr12	2599
ENSMUSG00000102373.1	143.973	0.445314	0.394278	1.12944	0.258711	0.999934	128.068	112.501	205.606	129.718	120	125	185	141	9530018H14Rik	TEC	chr6	1243
ENSMUSG00000102369.1	7.45467	-0.319246	1.59638	-0.199981	0.841495	NA	5.33619	10.8001	10.0025	3.67995	5	12	9	4	9530022L04Rik	TEC	chr3	310
ENSMUSG00000097462.7	17.3304	0.375524	1.06775	0.351698	0.725065	NA	13.8741	14.4001	30.0074	11.0399	13	16	27	12	9530026P05Rik	antisense	chr6	5750
ENSMUSG00000097197.1	1.5025	0.0455163	3.26566	0.0139378	0.98888	NA	1.06724	1.80001	2.22277	0.919988	1	2	2	1	9530027J09Rik	lincRNA	chrX	1684
ENSMUSG00000087670.1	0.266809	-1.24165	4.96683	-0.249988	0.802597	NA	1.06724	0	0	0	1	0	0	0	9530036M11Rik	antisense	chr6	1996
ENSMUSG00000097726.7	27.5181	0.285231	0.844353	0.33781	0.735506	0.999934	25.6137	23.4001	23.3391	37.7195	24	26	21	41	9530036O11Rik	antisense	chr5	3665
ENSMUSG00000086047.1	2.28086	-3.07692	3.10472	-0.991047	0.321663	NA	6.40342	1.80001	0	0.919988	6	2	0	1	9530046B11Rik	antisense	chr5	1157
ENSMUSG00000085982.1	0.726803	0.594751	4.88436	0.121766	0.903084	NA	1.06724	0	0	1.83998	1	0	0	2	9530051G07Rik	processed_transcript	chrX	4414
ENSMUSG00000097858.2	4.6468	0.496039	1.93984	0.255711	0.798174	NA	3.20171	4.50003	4.44554	6.43992	3	5	4	7	9530052C20Rik	lincRNA	chr3	1372
ENSMUSG00000096938.7	10.2047	0.671298	1.34842	0.497841	0.618596	NA	9.60514	6.30004	11.1139	13.7998	9	7	10	15	9530052E02Rik	processed_transcript	chr8	1849
ENSMUSG00000078776.9	24.6348	-1.02689	0.888263	-1.15607	0.247653	NA	29.8826	36.0002	13.3366	19.3197	28	40	12	21	9530053A07Rik	protein_coding	chr7	11843
ENSMUSG00000115955.1	23.9393	-0.272288	0.9009	-0.30224	0.762469	NA	28.8154	23.4001	17.7822	25.7597	27	26	16	28	9530056E24Rik	TEC	chr2	3290
ENSMUSG00000045345.6	21.5897	1.03261	0.949909	1.08706	0.277009	NA	18.143	10.8001	28.896	28.5196	17	12	26	31	9530056K15Rik	TEC	chr5	2316
ENSMUSG00000097736.8	0.229997	1.33177	4.96683	0.268132	0.788597	NA	0	0	0	0.919988	0	0	0	1	9530059O14Rik	lincRNA	chr9	6620
ENSMUSG00000108030.1	6.14431	0.230778	1.70368	0.135459	0.892249	NA	4.26895	7.20004	6.66831	6.43992	4	8	6	7	9530062K07Rik	bidirectional_promoter_lncRNA	chr6	787
ENSMUSG00000036275.13	1552.48	0.0278093	0.173574	0.160216	0.872711	0.999934	1531.49	1543.51	1573.72	1561.22	1435	1715	1416	1697	9530068E07Rik	protein_coding	chr11	3296
ENSMUSG00000036411.10	1.94646	-0.739528	2.9067	-0.254422	0.79917	NA	2.13447	2.70002	1.11139	1.83998	2	3	1	2	9530077C05Rik	protein_coding	chr9	4856
ENSMUSG00000109268.1	8.71091	0.306896	1.51262	0.20289	0.839221	NA	12.8068	3.60002	5.55693	12.8798	12	4	5	14	9530078K11Rik	TEC	chr7	694
ENSMUSG00000044125.6	18.1386	-0.808781	1.02197	-0.791395	0.428714	NA	24.5465	21.6001	14.448	11.9598	23	24	13	13	9530080O11Rik	processed_transcript	chr4	1725
ENSMUSG00000097006.7	441.555	0.172694	0.246859	0.699565	0.484199	0.999934	431.164	398.702	495.678	440.674	404	443	446	479	9530082P21Rik	antisense	chr17	4842
ENSMUSG00000107742.1	71.8577	-0.301115	0.548972	-0.548507	0.583344	0.999934	85.379	72.0004	50.0124	80.0389	80	80	45	87	9530085L11Rik	TEC	chr8	2115
ENSMUSG00000108076.1	21.6337	-1.35369	0.970202	-1.39526	0.162936	NA	24.5465	36.0002	6.66831	19.3197	23	40	6	21	9530086O07Rik	TEC	chr6	2685
ENSMUSG00000106371.1	36.2547	-0.291959	0.732494	-0.398583	0.6902	0.999934	34.1516	45.9003	30.0074	34.9595	32	51	27	38	9530097N15Rik	sense_intronic	chr3	1068
ENSMUSG00000097825.5	2.06424	0.434447	3.43653	0.12642	0.899399	NA	0	2.70002	5.55693	0	0	3	5	0	9630001P10Rik	antisense	chr5	4765
ENSMUSG00000103867.1	99.116	0.0541329	0.465165	0.116374	0.907356	0.999934	84.3117	110.701	106.693	94.7588	79	123	96	103	9630010A21Rik	TEC	chr1	2703
ENSMUSG00000059027.14	4.99069	1.66874	1.96876	0.847609	0.396656	NA	4.26895	0.900005	11.1139	3.67995	4	1	10	4	9630013D21Rik	processed_transcript	chr4	3142
ENSMUSG00000086359.1	1.10035	0.886422	4.45296	0.199063	0.842213	NA	1.06724	0	3.33416	0	1	0	3	0	9630013K17Rik	antisense	chr11	1072
ENSMUSG00000051295.7	1.34138	3.57398	4.10858	0.869884	0.384364	NA	0	0	4.44554	0.919988	0	0	4	1	9630028B13Rik	antisense	chr1	3406
ENSMUSG00000085631.1	0.732845	1.31069	4.86178	0.26959	0.787476	NA	0	0.900005	1.11139	0.919988	0	1	1	1	9630028H03Rik	antisense	chr2	3639
ENSMUSG00000115275.1	0.721808	-1.21757	4.86122	-0.250466	0.802227	NA	1.06724	0.900005	0	0.919988	1	1	0	1	9630050E16Rik	TEC	chr14	7441
ENSMUSG00000099552.1	0.266809	-1.24165	4.96683	-0.249988	0.802597	NA	1.06724	0	0	0	1	0	0	0	9830004L10Rik	lincRNA	chr1	2333
ENSMUSG00000073386.5	0.266809	-1.24165	4.96683	-0.249988	0.802597	NA	1.06724	0	0	0	1	0	0	0	9830107B12Rik	protein_coding	chr17	3691
ENSMUSG00000104763.1	1.7793	2.13956	3.34884	0.638896	0.52289	NA	2.13447	0	2.22277	2.75996	2	0	2	3	9830132P13Rik	lincRNA	chr3	4187
ENSMUSG00000087528.1	6.49794	-0.389342	1.70631	-0.228178	0.819508	NA	8.5379	4.50003	11.1139	1.83998	8	5	10	2	9830144P21Rik	processed_transcript	chr2	4889
ENSMUSG00000096052.1	7.56819	0.564712	1.57355	0.358877	0.719687	NA	3.20171	9.90006	8.89109	8.27989	3	11	8	9	9930004E17Rik	antisense	chr14	498
ENSMUSG00000044551.13	39.8335	-0.178488	0.71295	-0.250351	0.802316	0.999934	33.0844	52.2003	40.0099	34.0396	31	58	36	37	9930012K11Rik	protein_coding	chr14	2588
ENSMUSG00000097493.3	72.9646	-0.506644	0.536059	-0.945126	0.344594	0.999934	90.7152	80.1005	51.1237	69.9191	85	89	46	76	9930014A18Rik	processed_transcript	chr15	7043
ENSMUSG00000115276.1	120.061	-0.229973	0.424736	-0.541448	0.588199	0.999934	122.732	135.901	122.252	99.3587	115	151	110	108	9930017N22Rik	TEC	chr15	3745
ENSMUSG00000046138.15	954.168	-0.0467026	0.197254	-0.236763	0.812841	0.999934	930.631	1004.41	840.208	1041.43	872	1116	756	1132	9930021J03Rik	protein_coding	chr19	8134
ENSMUSG00000045065.7	0.450003	-1.81261	4.93254	-0.367481	0.71326	NA	0	1.80001	0	0	0	2	0	0	9930022D16Rik	protein_coding	chr11	2706
ENSMUSG00000111131.1	36.6499	-0.150947	0.742065	-0.203414	0.838811	0.999934	44.824	32.4002	28.896	40.4795	42	36	26	44	9930024M15Rik	TEC	chr10	2584
ENSMUSG00000044730.17	184.61	-0.0336374	0.361965	-0.0929299	0.925959	0.999934	167.556	205.201	205.606	160.078	157	228	185	174	9930104L06Rik	protein_coding	chr4	5592
ENSMUSG00000069893.10	8.63388	-2.22717	1.51227	-1.47273	0.140824	NA	14.9413	13.5001	3.33416	2.75996	14	15	3	3	9930111J21Rik1	protein_coding	chr11	4895
ENSMUSG00000069892.9	14.273	-1.71766	1.1914	-1.44172	0.149383	NA	24.5465	18.9001	4.44554	9.19988	23	21	4	10	9930111J21Rik2	protein_coding	chr11	7017
ENSMUSG00000108120.1	26.7822	-0.0347738	0.851863	-0.040821	0.967439	0.999934	30.9499	23.4001	23.3391	29.4396	29	26	21	32	9930120I10Rik	TEC	chr6	865
ENSMUSG00000110357.1	59.6112	-0.242678	0.594882	-0.407943	0.683315	0.999934	62.967	63.9004	38.8985	72.679	59	71	35	79	A030001D20Rik	antisense	chr7	1542
ENSMUSG00000113880.1	0.951805	-0.75395	4.34432	-0.173549	0.86222	NA	1.06724	0.900005	0	1.83998	1	1	0	2	A030005L19Rik	protein_coding	chr1	806
ENSMUSG00000069136.4	1.135	-0.273278	4.36358	-0.062627	0.950064	NA	0	2.70002	0	1.83998	0	3	0	2	A130006I12Rik	pseudogene	chr2	408
ENSMUSG00000079144.7	288.908	-0.295259	0.289483	-1.01995	0.307752	0.999934	305.23	331.202	242.282	276.916	286	368	218	301	A130010J15Rik	protein_coding	chr1	4403
ENSMUSG00000112822.1	124.032	-0.0310899	0.416597	-0.0746283	0.94051	0.999934	125.934	124.201	108.916	137.078	118	138	98	149	A130012E19Rik	TEC	chr10	3135
ENSMUSG00000097944.1	43.9178	0.600898	0.671101	0.895391	0.370578	0.999934	41.6223	28.8002	55.5693	49.6793	39	32	50	54	A130014A01Rik	bidirectional_promoter_lncRNA	chr8	2323
ENSMUSG00000102642.1	48.2043	-0.605766	0.640922	-0.945149	0.344583	0.999934	67.2359	49.5003	41.1213	34.9595	63	55	37	38	A130048G24Rik	TEC	chr1	2750
ENSMUSG00000102277.1	8.63229	0.347243	1.49962	0.231554	0.816885	NA	10.6724	4.50003	5.55693	13.7998	10	5	5	15	A130050O07Rik	TEC	chr1	3023
ENSMUSG00000097643.1	7.40682	-0.255706	1.58501	-0.161328	0.871835	NA	5.33619	10.8001	8.89109	4.59994	5	12	8	5	A130051J06Rik	antisense	chr15	2618
ENSMUSG00000104291.1	12.4298	-3.41706	1.49471	-2.2861	0.0222482	NA	23.4792	19.8001	0	6.43992	22	22	0	7	A130071D04Rik	TEC	chr1	5864
ENSMUSG00000112095.1	0.229997	1.33177	4.96683	0.268132	0.788597	NA	0	0	0	0.919988	0	0	0	1	A130077B15Rik	lincRNA	chr10	2547
ENSMUSG00000052595.7	578.239	-0.00842875	0.267354	-0.0315266	0.97485	0.999934	563.501	567.903	402.322	779.23	528	631	362	847	A1cf	protein_coding	chr19	3349
ENSMUSG00000087612.1	0.225001	-1.24388	4.96736	-0.250411	0.802269	NA	0	0.900005	0	0	0	1	0	0	A230005M16Rik	antisense	chr2	1778
ENSMUSG00000097845.2	0.454998	0.0444687	4.88765	0.00909818	0.992741	NA	0	0.900005	0	0.919988	0	1	0	1	A230020J21Rik	antisense	chr1	1650
ENSMUSG00000096960.1	1.04146	0.834461	4.19109	0.199104	0.842182	NA	2.13447	0	1.11139	0.919988	2	0	1	1	A230028O05Rik	lincRNA	chr16	2793
ENSMUSG00000038884.14	70.9458	-1.47616	0.543673	-2.71516	0.00662446	0.303368	117.396	91.8005	37.7871	36.7995	110	102	34	40	A230050P20Rik	protein_coding	chr9	3417
ENSMUSG00000117172.1	1.65283	2.42175	3.45957	0.700014	0.483919	NA	0	0.900005	1.11139	4.59994	0	1	1	5	A230051N06Rik	lincRNA	chr17	749
ENSMUSG00000020887.3	0.266809	-1.24165	4.96683	-0.249988	0.802597	NA	1.06724	0	0	0	1	0	0	0	A230052G05Rik	TEC	chr8	2302
ENSMUSG00000087178.7	30.6756	0.428455	0.800378	0.535315	0.592432	0.999934	28.8154	23.4001	30.0074	40.4795	27	26	27	44	A230056P14Rik	processed_transcript	chr7	2354
ENSMUSG00000109394.2	0.266809	-1.24165	4.96683	-0.249988	0.802597	NA	1.06724	0	0	0	1	0	0	0	A230057D06Rik	lincRNA	chr7	11357
ENSMUSG00000087627.2	0.780694	0.595588	4.88183	0.122001	0.902898	NA	0	0.900005	2.22277	0	0	1	2	0	A230059L01Rik	processed_transcript	chr1	4376
ENSMUSG00000097692.2	2.6018	2.20753	2.85359	0.773597	0.439169	NA	3.20171	0	4.44554	2.75996	3	0	4	3	A230060F14Rik	antisense	chr10	1889
ENSMUSG00000092071.1	2.03612	-0.738143	2.8576	-0.258309	0.796168	NA	3.20171	1.80001	2.22277	0.919988	3	2	2	1	A230065N10Rik	antisense	chr7	1028
ENSMUSG00000086877.7	24.6449	0.18733	0.878491	0.213241	0.831139	NA	24.5465	21.6001	26.6733	25.7597	23	24	24	28	A230072C01Rik	processed_transcript	chrX	1581
ENSMUSG00000084771.8	43.1549	0.303831	0.675941	0.449493	0.653076	0.999934	37.3533	39.6002	53.3465	42.3194	35	44	48	46	A230072E10Rik	antisense	chrX	6252
ENSMUSG00000074473.1	3.20688	-0.843759	2.35315	-0.358565	0.71992	NA	5.33619	2.70002	1.11139	3.67995	5	3	1	4	A230072I06Rik	protein_coding	chr8	1839
ENSMUSG00000055818.2	1.39681	-2.16371	3.70023	-0.584752	0.558715	NA	1.06724	3.60002	0	0.919988	1	4	0	1	A230083G16Rik	antisense	chr6	991
ENSMUSG00000085482.1	0.957846	0.848179	4.33423	0.195693	0.84485	NA	0	1.80001	1.11139	0.919988	0	2	1	1	A230083N12Rik	antisense	chr4	572
ENSMUSG00000110047.1	0.229997	1.33177	4.96683	0.268132	0.788597	NA	0	0	0	0.919988	0	0	0	1	A230085B16Rik	TEC	chr8	1856
ENSMUSG00000097381.2	0.496806	0.0450723	4.9968	0.00902022	0.992803	NA	1.06724	0	0	0.919988	1	0	0	1	A230087F16Rik	antisense	chr12	2880
ENSMUSG00000087026.7	5.99293	-0.197207	1.71835	-0.114765	0.908631	NA	6.40342	6.30004	6.66831	4.59994	6	7	6	5	A230103J11Rik	processed_transcript	chr8	2132
ENSMUSG00000109122.1	0.277846	1.334	4.96736	0.268553	0.788274	NA	0	0	1.11139	0	0	0	1	0	A230103L15Rik	TEC	chr7	3872
ENSMUSG00000097292.2	11.1245	0.052305	1.29571	0.0403679	0.9678	NA	12.8068	9.00005	8.89109	13.7998	12	10	8	15	A230107N01Rik	antisense	chr13	2558
ENSMUSG00000087125.1	0.225001	-1.24388	4.96736	-0.250411	0.802269	NA	0	0.900005	0	0	0	1	0	0	A230108P19Rik	antisense	chr2	2500
ENSMUSG00000047228.9	11.3657	1.03626	1.29072	0.802858	0.422057	NA	8.5379	6.30004	12.2252	18.3998	8	7	11	20	A2ml1	protein_coding	chr6	7753
ENSMUSG00000097915.2	1.39681	-2.16371	3.70023	-0.584752	0.558715	NA	1.06724	3.60002	0	0.919988	1	4	0	1	A330009N23Rik	antisense	chr15	1772
ENSMUSG00000104093.1	0.454998	0.0444687	4.88765	0.00909818	0.992741	NA	0	0.900005	0	0.919988	0	1	0	1	A330015K06Rik	antisense	chr3	6190
ENSMUSG00000096929.7	613.707	0.280137	0.22115	1.26673	0.205252	0.999934	543.224	565.203	649.049	697.351	509	628	584	758	A330023F24Rik	processed_transcript	chr1	9354
ENSMUSG00000097591.1	0.229997	1.33177	4.96683	0.268132	0.788597	NA	0	0	0	0.919988	0	0	0	1	A330032B11Rik	lincRNA	chr19	1919
ENSMUSG00000097622.2	0.266809	-1.24165	4.96683	-0.249988	0.802597	NA	1.06724	0	0	0	1	0	0	0	A330033J07Rik	antisense	chr13	2816
ENSMUSG00000085615.2	109.343	0.358819	0.443518	0.809029	0.418498	0.999934	103.522	88.2005	112.25	133.398	97	98	101	145	A330035P11Rik	lincRNA	chr14	3203
ENSMUSG00000086213.2	3.26577	-0.16407	2.27625	-0.0720791	0.942539	NA	4.26895	2.70002	3.33416	2.75996	4	3	3	3	A330040F15Rik	processed_transcript	chr19	2323
ENSMUSG00000087466.3	0.454998	0.0444687	4.88765	0.00909818	0.992741	NA	0	0.900005	0	0.919988	0	1	0	1	A330041J22Rik	antisense	chr9	1825
ENSMUSG00000097868.1	4.2825	0.180285	2.02741	0.0889237	0.929143	NA	3.20171	4.50003	6.66831	2.75996	3	5	6	3	A330069E16Rik	lincRNA	chr2	887
ENSMUSG00000097960.1	0.496806	0.0450723	4.9968	0.00902022	0.992803	NA	1.06724	0	0	0.919988	1	0	0	1	A330074K22Rik	lincRNA	chr8	2489
ENSMUSG00000113186.1	0.277846	1.334	4.96736	0.268553	0.788274	NA	0	0	1.11139	0	0	0	1	0	A330076C08Rik	lincRNA	chr13	6641
ENSMUSG00000109321.1	0.544656	0.0456629	4.88765	0.00934252	0.992546	NA	1.06724	0	1.11139	0	1	0	1	0	A330076H08Rik	processed_transcript	chr7	4448
ENSMUSG00000114210.1	2.94458	1.65181	2.57434	0.641646	0.521103	NA	1.06724	0.900005	8.89109	0.919988	1	1	8	1	A330084C13Rik	antisense	chr18	1180
ENSMUSG00000086363.7	4.39689	0.062847	2.01805	0.0311425	0.975156	NA	7.47066	1.80001	5.55693	2.75996	7	2	5	3	A330102I10Rik	lincRNA	chr13	1772
ENSMUSG00000028794.13	7.1719	-0.235346	1.59275	-0.147761	0.882531	NA	9.60514	5.40003	10.0025	3.67995	9	6	9	4	A3galt2	protein_coding	chr4	3588
ENSMUSG00000047613.10	290.593	0.210677	0.301919	0.697792	0.485307	0.999934	247.599	289.802	348.975	275.996	232	322	314	300	A430005L14Rik	protein_coding	chr4	1552
ENSMUSG00000097603.3	1.98328	-1.53986	2.92358	-0.526705	0.598399	NA	3.20171	2.70002	1.11139	0.919988	3	3	1	1	A430010J10Rik	processed_transcript	chr6	4379
ENSMUSG00000085315.7	18.5677	-0.913337	1.01417	-0.900579	0.367812	NA	29.8826	18.9001	14.448	11.0399	28	21	13	12	A430018G15Rik	processed_transcript	chr2	1713
ENSMUSG00000104432.1	35.5925	-0.590427	0.738899	-0.799063	0.424254	0.999934	45.8912	39.6002	31.1188	25.7597	43	44	28	28	A430027C01Rik	TEC	chr9	1644
ENSMUSG00000056014.15	242.161	0.0796485	0.310724	0.256332	0.797694	0.999934	258.271	211.501	284.515	214.357	242	235	256	233	A430033K04Rik	protein_coding	chr5	4097
ENSMUSG00000103594.1	0.229997	1.33177	4.96683	0.268132	0.788597	NA	0	0	0	0.919988	0	0	0	1	A430034D21Rik	lincRNA	chr1	1802
ENSMUSG00000087305.8	49.4748	0.754343	0.635036	1.18788	0.234883	0.999934	41.6223	32.4002	62.2376	61.6392	39	36	56	67	A430035B10Rik	processed_transcript	chr6	5056
ENSMUSG00000097353.1	38.3645	-0.317334	0.711997	-0.445696	0.655817	0.999934	43.7567	41.4002	33.3416	34.9595	41	46	30	38	A430046D13Rik	lincRNA	chr10	1997
ENSMUSG00000086650.1	2.54501	-1.66553	2.88599	-0.577109	0.563866	NA	2.13447	3.60002	4.44554	0	2	4	4	0	A430048G15Rik	lincRNA	chr2	627
ENSMUSG00000102372.1	0.544656	0.0456629	4.88765	0.00934252	0.992546	NA	1.06724	0	1.11139	0	1	0	1	0	A430050A11Rik	TEC	chr1	646
ENSMUSG00000090564.9	19.5507	0.969745	0.989625	0.979911	0.32713	NA	12.8068	13.5001	28.896	22.9997	12	15	26	25	A430057M04Rik	antisense	chr14	5274
ENSMUSG00000090030.1	0.229997	1.33177	4.96683	0.268132	0.788597	NA	0	0	0	0.919988	0	0	0	1	A430072P03Rik	processed_transcript	chr5	1667
ENSMUSG00000105471.1	3.26361	-1.50535	2.59511	-0.580073	0.561866	NA	2.13447	5.40003	0	5.51993	2	6	0	6	A430073D23Rik	lincRNA	chr5	665
ENSMUSG00000074497.5	3.42584	-1.91013	2.53931	-0.752225	0.451916	NA	6.40342	2.70002	0	4.59994	6	3	0	5	A430078G23Rik	protein_coding	chr8	4755
ENSMUSG00000085589.7	33.3368	-0.822475	0.768517	-1.07021	0.284525	0.999934	41.6223	43.2002	20.0049	28.5196	39	48	18	31	A430078I02Rik	antisense	chr6	2761
ENSMUSG00000116220.1	9.9739	-3.21074	1.52723	-2.10233	0.0355248	NA	14.9413	20.7001	3.33416	0.919988	14	23	3	1	A430088P11Rik	antisense	chr15	4502
ENSMUSG00000067577.8	1.34508	-1.02618	4.08696	-0.251087	0.801747	NA	4.26895	0	1.11139	0	4	0	1	0	A430093F15Rik	processed_transcript	chr19	3119
ENSMUSG00000112096.1	5.37182	0.0381027	1.82919	0.0208304	0.983381	NA	5.33619	4.50003	8.89109	2.75996	5	5	8	3	A430103D13Rik	TEC	chr12	857
ENSMUSG00000097784.1	6.10645	0.580874	1.71113	0.339467	0.734258	NA	4.26895	5.40003	5.55693	9.19988	4	6	5	10	A430105J06Rik	lincRNA	chr1	1275
ENSMUSG00000098206.1	6.93265	-0.23445	1.62678	-0.144119	0.885407	NA	9.60514	5.40003	4.44554	8.27989	9	6	4	9	A430106G13Rik	lincRNA	chr1	3388
ENSMUSG00000086851.1	0.721808	-1.21757	4.86122	-0.250466	0.802227	NA	1.06724	0.900005	0	0.919988	1	1	0	1	A430108G06Rik	processed_transcript	chr11	1504
ENSMUSG00000102415.1	58.8005	0.191174	0.5812	0.328929	0.742209	0.999934	57.6308	52.2003	65.5718	59.7992	54	58	59	65	A430110C17Rik	TEC	chr5	4348
ENSMUSG00000054135.2	6.12748	1.34586	1.72956	0.778152	0.436479	NA	3.20171	3.60002	6.66831	11.0399	3	4	6	12	A430110L20Rik	lincRNA	chr1	2513
ENSMUSG00000047878.13	257.655	0.0409913	0.305504	0.134176	0.893264	0.999934	260.406	245.701	294.517	229.997	244	273	265	250	A4galt	protein_coding	chr15	2278
ENSMUSG00000037953.7	480.682	-0.232875	0.268472	-0.867408	0.385718	0.999934	448.24	562.503	290.072	621.912	420	625	261	676	A4gnt	protein_coding	chr9	2757
ENSMUSG00000114452.1	0.229997	1.33177	4.96683	0.268132	0.788597	NA	0	0	0	0.919988	0	0	0	1	A530001N23Rik	lincRNA	chr13	3901
ENSMUSG00000051986.6	0.277846	1.334	4.96736	0.268553	0.788274	NA	0	0	1.11139	0	0	0	1	0	A530006G24Rik	lincRNA	chr2	1331
ENSMUSG00000110682.1	2.87749	1.04394	2.47325	0.422094	0.672956	NA	1.06724	2.70002	2.22277	5.51993	1	3	2	6	A530010L16Rik	lincRNA	chr8	2345
ENSMUSG00000006462.6	5.01689	-1.31296	1.94519	-0.674978	0.49969	NA	5.33619	8.10005	1.11139	5.51993	5	9	1	6	A530013C23Rik	lincRNA	chr2	5964
ENSMUSG00000043122.7	0.266809	-1.24165	4.96683	-0.249988	0.802597	NA	1.06724	0	0	0	1	0	0	0	A530016L24Rik	protein_coding	chr12	3110
ENSMUSG00000072847.4	117.207	0.0467417	0.427409	0.109361	0.912917	0.999934	122.732	108.001	111.139	126.958	115	120	100	138	A530017D24Rik	lincRNA	chr11	2614
ENSMUSG00000097124.2	195.955	0.802063	0.339753	2.36072	0.0182395	0.534208	157.951	127.801	274.512	223.557	148	142	247	243	A530020G20Rik	antisense	chr3	3773
ENSMUSG00000072109.11	0.266809	-1.24165	4.96683	-0.249988	0.802597	NA	1.06724	0	0	0	1	0	0	0	A530040E14Rik	antisense	chr1	2323
ENSMUSG00000104973.1	38.8479	-0.00541629	0.707154	-0.00765927	0.993889	0.999934	37.3533	40.5002	38.8985	38.6395	35	45	35	42	A530041M06Rik	sense_intronic	chr3	2288
ENSMUSG00000087694.8	0.726803	0.594751	4.88436	0.121766	0.903084	NA	1.06724	0	0	1.83998	1	0	0	2	A530058N18Rik	processed_transcript	chr2	5470
ENSMUSG00000104273.1	43.4268	-0.119288	0.677572	-0.176053	0.860253	0.999934	36.2861	54.9003	41.1213	41.3995	34	61	37	45	A530064N14Rik	TEC	chr9	1492
ENSMUSG00000114531.1	0.266809	-1.24165	4.96683	-0.249988	0.802597	NA	1.06724	0	0	0	1	0	0	0	A530065N20Rik	lincRNA	chr13	5654
ENSMUSG00000085112.1	27.4504	-0.217952	0.834372	-0.261217	0.793925	0.999934	32.0171	27.0002	27.7846	22.9997	30	30	25	25	A530072M11Rik	processed_transcript	chr4	1852
ENSMUSG00000097322.8	1.77431	0.531667	3.02673	0.175657	0.860563	NA	2.13447	0.900005	2.22277	1.83998	2	1	2	2	A530083I20Rik	processed_transcript	chr9	7684
ENSMUSG00000106024.1	0.721808	-1.21757	4.86122	-0.250466	0.802227	NA	1.06724	0.900005	0	0.919988	1	1	0	1	A530083M17Rik	TEC	chr3	3376
ENSMUSG00000090863.1	17.4701	0.291178	1.03567	0.28115	0.778595	NA	17.0758	14.4001	20.0049	18.3998	16	16	18	20	A530084C06Rik	protein_coding	chr13	3200
ENSMUSG00000052760.16	76.6643	0.459362	0.515952	0.89032	0.373294	0.999934	71.5049	56.7003	106.693	71.7591	67	63	96	78	A630001G21Rik	protein_coding	chr1	2709
ENSMUSG00000110498.1	12.643	0.299507	1.21344	0.246824	0.805044	NA	12.8068	9.90006	12.2252	15.6398	12	11	11	17	A630001O12Rik	lincRNA	chr8	2182
ENSMUSG00000109056.1	2.21327	-1.02411	2.75185	-0.372153	0.709779	NA	3.20171	2.70002	1.11139	1.83998	3	3	1	2	A630009H07Rik	lincRNA	chr8	2159
ENSMUSG00000075395.11	2.69405	-2.81659	2.83694	-0.992829	0.320793	NA	5.33619	3.60002	0	1.83998	5	4	0	2	A630010A05Rik	protein_coding	chr16	3375
ENSMUSG00000055110.8	0.229997	1.33177	4.96683	0.268132	0.788597	NA	0	0	0	0.919988	0	0	0	1	A630012P03Rik	antisense	chrX	1974
ENSMUSG00000086395.1	0.225001	-1.24388	4.96736	-0.250411	0.802269	NA	0	0.900005	0	0	0	1	0	0	A630014C17Rik	antisense	chr11	2984
ENSMUSG00000095493.2	0.277846	1.334	4.96736	0.268553	0.788274	NA	0	0	1.11139	0	0	0	1	0	A630023A22Rik	protein_coding	chr14	1338
ENSMUSG00000086725.1	27.2645	0.439525	0.843849	0.520857	0.602466	0.999934	25.6137	20.7001	27.7846	34.9595	24	23	25	38	A630052C17Rik	processed_transcript	chr11	2203
ENSMUSG00000097160.2	1.0475	-0.748155	4.18243	-0.17888	0.858032	NA	1.06724	0.900005	2.22277	0	1	1	2	0	A630072L19Rik	antisense	chr12	4663
ENSMUSG00000101013.1	70.2336	0.362483	0.5367	0.675392	0.499427	0.999934	58.698	63.9004	70.0173	88.3188	55	71	63	96	A630072M18Rik	antisense	chr5	5410
ENSMUSG00000097065.1	0.684995	0.570179	4.85336	0.117481	0.906479	NA	0	0.900005	0	1.83998	0	1	0	2	A630075F10Rik	lincRNA	chr2	1913
ENSMUSG00000102721.1	1.74724	-2.75226	3.40716	-0.807788	0.419213	NA	4.26895	1.80001	0	0.919988	4	2	0	1	A630081D01Rik	TEC	chr1	1833
ENSMUSG00000116673.1	83.075	0.325042	0.49666	0.654456	0.512818	0.999934	65.1015	82.8005	87.7995	96.5987	61	92	79	105	A630089N07Rik	protein_coding	chr16	4251
ENSMUSG00000084846.1	17.808	0.57336	1.03225	0.55545	0.578587	NA	19.2103	9.90006	25.5619	16.5598	18	11	23	18	A730011C13Rik	antisense	chr3	2234
ENSMUSG00000090551.1	0.684995	0.570179	4.85336	0.117481	0.906479	NA	0	0.900005	0	1.83998	0	1	0	2	A730015C16Rik	protein_coding	chr4	1221
ENSMUSG00000085566.1	138.886	-0.377411	0.398632	-0.946766	0.343758	0.999934	162.22	151.201	107.804	134.318	152	168	97	146	A730017L22Rik	processed_transcript	chr2	6012
ENSMUSG00000097924.2	19.556	-0.441881	0.999481	-0.44211	0.658409	NA	21.3447	22.5001	23.3391	11.0399	20	25	21	12	A730020E08Rik	bidirectional_promoter_lncRNA	chr6	3895
ENSMUSG00000044522.8	0.229997	1.33177	4.96683	0.268132	0.788597	NA	0	0	0	0.919988	0	0	0	1	A730020M07Rik	lincRNA	chr3	2687
ENSMUSG00000045238.9	0.229997	1.33177	4.96683	0.268132	0.788597	NA	0	0	0	0.919988	0	0	0	1	A730035I17Rik	antisense	chr5	2393
ENSMUSG00000056738.11	2.15463	2.94837	3.20422	0.920152	0.357493	NA	1.06724	0	1.11139	6.43992	1	0	1	7	A730036I17Rik	lincRNA	chr2	3614
ENSMUSG00000111232.1	0.266809	-1.24165	4.96683	-0.249988	0.802597	NA	1.06724	0	0	0	1	0	0	0	A730043L09Rik	lincRNA	chr9	1205
ENSMUSG00000048636.7	0.229997	1.33177	4.96683	0.268132	0.788597	NA	0	0	0	0.919988	0	0	0	1	A730049H05Rik	protein_coding	chr6	3739
ENSMUSG00000097756.2	1.79509	-2.65186	3.34	-0.793969	0.427213	NA	4.26895	1.80001	1.11139	0	4	2	1	0	A730056A06Rik	antisense	chr7	2776
ENSMUSG00000053588.3	1.18784	1.24866	3.93931	0.316975	0.751263	NA	0	1.80001	1.11139	1.83998	0	2	1	2	A730061H03Rik	protein_coding	chr14	465
ENSMUSG00000102971.1	0.277846	1.334	4.96736	0.268553	0.788274	NA	0	0	1.11139	0	0	0	1	0	A730062M13Rik	TEC	chr9	1910
ENSMUSG00000112639.1	10.8836	0.388694	1.307	0.297395	0.766165	NA	6.40342	12.6001	8.89109	15.6398	6	14	8	17	A730063M14Rik	lincRNA	chr10	1770
ENSMUSG00000096923.1	0.225001	-1.24388	4.96736	-0.250411	0.802269	NA	0	0.900005	0	0	0	1	0	0	A730071L15Rik	protein_coding	chr11	1615
ENSMUSG00000086693.1	2.30922	4.65071	3.26848	1.4229	0.154765	NA	0	0	5.55693	3.67995	0	0	5	4	A730081D07Rik	antisense	chr13	1804
ENSMUSG00000093598.1	0.266809	-1.24165	4.96683	-0.249988	0.802597	NA	1.06724	0	0	0	1	0	0	0	A730085K08Rik	antisense	chr9	2013
ENSMUSG00000103529.1	124.103	-0.22244	0.413287	-0.538223	0.590423	0.999934	131.27	135.901	107.804	121.438	123	151	97	132	A730089K16Rik	TEC	chr5	2427
ENSMUSG00000090120.1	2.6375	0.113277	2.55745	0.044293	0.964671	NA	1.06724	4.50003	2.22277	2.75996	1	5	2	3	A730090N16Rik	antisense	chr3	627
ENSMUSG00000113965.1	62.7781	0.943078	0.567831	1.66084	0.0967453	0.999934	37.3533	48.6003	72.2401	92.9188	35	54	65	101	A730091E23Rik	TEC	chr13	3825
ENSMUSG00000053181.1	2.23035	-0.171488	2.77636	-0.0617672	0.950748	NA	1.06724	3.60002	3.33416	0.919988	1	4	3	1	A830005F24Rik	protein_coding	chr13	786
ENSMUSG00000100627.6	0.533619	-1.8095	4.93228	-0.366869	0.713717	NA	2.13447	0	0	0	2	0	0	0	A830008E24Rik	lincRNA	chr1	5637
ENSMUSG00000097182.2	0.229997	1.33177	4.96683	0.268132	0.788597	NA	0	0	0	0.919988	0	0	0	1	A830009L08Rik	lincRNA	chr13	2807
ENSMUSG00000059706.4	0.266809	-1.24165	4.96683	-0.249988	0.802597	NA	1.06724	0	0	0	1	0	0	0	A830035A12Rik	processed_transcript	chr11	861
ENSMUSG00000111329.1	4.15474	-1.22608	2.06359	-0.594148	0.552413	NA	5.33619	6.30004	2.22277	2.75996	5	7	2	3	A830035O19Rik	antisense	chr9	1898
ENSMUSG00000097413.1	2.07423	3.02308	3.20755	0.942492	0.345941	NA	0	0.900005	5.55693	1.83998	0	1	5	2	A830052D11Rik	lincRNA	chr18	1130
ENSMUSG00000091890.2	22.8957	0.715772	0.914242	0.782913	0.433678	NA	14.9413	19.8001	25.5619	31.2796	14	22	23	34	A830073O21Rik	TEC	chr7	3096
ENSMUSG00000112280.1	15.9347	0.362642	1.08444	0.334406	0.738073	NA	11.7396	16.2001	15.5594	20.2397	11	18	14	22	A830082N09Rik	processed_transcript	chr10	7840
ENSMUSG00000087132.7	19.8111	-0.886988	0.982042	-0.903208	0.366415	NA	23.4792	27.9002	12.2252	15.6398	22	31	11	17	A930001C03Rik	processed_transcript	chr19	2008
ENSMUSG00000115918.1	0.266809	-1.24165	4.96683	-0.249988	0.802597	NA	1.06724	0	0	0	1	0	0	0	A930001M01Rik	antisense	chr15	5392
ENSMUSG00000045506.3	1.44966	-0.772517	3.34284	-0.231096	0.81724	NA	1.06724	2.70002	1.11139	0.919988	1	3	1	1	A930002H24Rik	protein_coding	chr17	492
ENSMUSG00000075330.4	9.83992	-1.43319	1.40441	-1.02049	0.307497	NA	16.0086	11.7001	8.89109	2.75996	15	13	8	3	A930003A15Rik	lincRNA	chr16	1126
ENSMUSG00000054057.2	3.20818	1.82601	2.37034	0.770356	0.441089	NA	1.06724	1.80001	4.44554	5.51993	1	2	4	6	A930004D18Rik	protein_coding	chr2	3378
ENSMUSG00000102602.1	351.859	-0.05952	0.269677	-0.220708	0.82532	0.999934	344.718	373.502	353.421	335.796	323	415	318	365	A930004J17Rik	TEC	chr4	4610
ENSMUSG00000054426.11	34.3839	-0.0798933	0.751466	-0.106316	0.915331	0.999934	29.8826	40.5002	26.6733	40.4795	28	45	24	44	A930005H10Rik	processed_transcript	chr3	2385
ENSMUSG00000087278.1	0.266809	-1.24165	4.96683	-0.249988	0.802597	NA	1.06724	0	0	0	1	0	0	0	A930006I01Rik	lincRNA	chr2	2229
ENSMUSG00000084866.2	4.12896	-0.372685	2.05372	-0.181468	0.856	NA	3.20171	6.30004	3.33416	3.67995	3	7	3	4	A930006K02Rik	processed_transcript	chr16	1151
ENSMUSG00000102097.1	0.507843	2.4877	4.89227	0.508496	0.611106	NA	0	0	1.11139	0.919988	0	0	1	1	A930006L05Rik	antisense	chr9	2814
ENSMUSG00000097855.7	16.3214	1.4062	1.10017	1.27817	0.201191	NA	10.6724	7.20004	18.8936	28.5196	10	8	17	31	A930007I19Rik	lincRNA	chr19	4341
ENSMUSG00000097610.2	8.97402	0.896458	1.46343	0.612574	0.540158	NA	9.60514	3.60002	8.89109	13.7998	9	4	8	15	A930012L18Rik	antisense	chr18	2477
ENSMUSG00000054181.11	10.0358	0.981123	1.37278	0.714696	0.474797	NA	10.6724	3.60002	16.6708	9.19988	10	4	15	10	A930012O16Rik	processed_transcript	chr2	1541
ENSMUSG00000092368.1	26.0592	0.259272	0.891721	0.290754	0.771239	NA	24.5465	20.7001	16.6708	42.3194	23	23	15	46	A930015D03Rik	antisense	chr17	1111
ENSMUSG00000114526.1	0.277846	1.334	4.96736	0.268553	0.788274	NA	0	0	1.11139	0	0	0	1	0	A930015P04Rik	TEC	chr13	772
ENSMUSG00000040705.2	0.266809	-1.24165	4.96683	-0.249988	0.802597	NA	1.06724	0	0	0	1	0	0	0	A930016O22Rik	antisense	chr7	2560
ENSMUSG00000025727.8	0.266809	-1.24165	4.96683	-0.249988	0.802597	NA	1.06724	0	0	0	1	0	0	0	A930017K11Rik	protein_coding	chr17	2539
ENSMUSG00000060530.2	5.65249	0.527603	1.77829	0.29669	0.766703	NA	3.20171	6.30004	6.66831	6.43992	3	7	6	7	A930017M01Rik	transcribed_processed_pseudogene	chr15	6307
ENSMUSG00000085958.1	0.225001	-1.24388	4.96736	-0.250411	0.802269	NA	0	0.900005	0	0	0	1	0	0	A930019D19Rik	antisense	chr2	958
ENSMUSG00000113575.1	12.2198	0.0990634	1.23024	0.0805235	0.935821	NA	13.8741	9.90006	12.2252	12.8798	13	11	11	14	A930023M06Rik	sense_intronic	chr12	1093
ENSMUSG00000056735.5	21.7826	0.688054	0.939152	0.732633	0.463782	NA	20.2775	13.5001	26.6733	26.6796	19	15	24	29	A930024E05Rik	antisense	chr5	1896
ENSMUSG00000097566.1	21.1935	-0.178002	0.94571	-0.188221	0.850704	NA	22.412	22.5001	17.7822	22.0797	21	25	16	24	A930024N18Rik	lincRNA	chr17	3955
ENSMUSG00000113688.1	2.44826	-0.198632	2.63748	-0.0753114	0.939967	NA	3.20171	1.80001	1.11139	3.67995	3	2	1	4	A930027P06Rik	TEC	chr13	2975
ENSMUSG00000114796.1	0.459994	1.89962	4.93227	0.385141	0.700133	NA	0	0	0	1.83998	0	0	0	2	A930028N01Rik	antisense	chr19	422
ENSMUSG00000105226.1	1.2825	2.28629	3.83304	0.59647	0.550862	NA	1.06724	0	2.22277	1.83998	1	0	2	2	A930028O11Rik	TEC	chr3	1108
ENSMUSG00000096988.1	1.66362	-2.65476	3.43672	-0.772469	0.439836	NA	2.13447	3.60002	0	0.919988	2	4	0	1	A930029G22Rik	lincRNA	chr17	1710
ENSMUSG00000108985.1	0.951805	-0.75395	4.34432	-0.173549	0.86222	NA	1.06724	0.900005	0	1.83998	1	1	0	2	A930030B08Rik	TEC	chr7	3965
ENSMUSG00000090622.1	4.00249	0.24657	2.15651	0.114337	0.90897	NA	1.06724	7.20004	2.22277	5.51993	1	8	2	6	A930033H14Rik	protein_coding	chr10	2969
ENSMUSG00000111665.1	0.277846	1.334	4.96736	0.268553	0.788274	NA	0	0	1.11139	0	0	0	1	0	A930033M14Rik	lincRNA	chr10	400
ENSMUSG00000052241.3	6.15929	0.84166	1.70583	0.493402	0.621729	NA	4.26895	4.50003	6.66831	9.19988	4	5	6	10	A930035D04Rik	pseudogene	chr6	543
ENSMUSG00000109408.1	36.3312	0.353896	0.731504	0.483792	0.628534	0.999934	28.8154	35.1002	40.0099	41.3995	27	39	36	45	A930037H05Rik	processed_transcript	chr11	9082
ENSMUSG00000097310.2	2.18146	0.0915214	2.77208	0.0330155	0.973662	NA	2.13447	1.80001	1.11139	3.67995	2	2	1	4	A930038B10Rik	lincRNA	chr14	6188
ENSMUSG00000113102.1	2.16043	-2.43254	3.06723	-0.793073	0.427735	NA	3.20171	3.60002	0	1.83998	3	4	0	2	A930040O22Rik	TEC	chr12	973
ENSMUSG00000085900.1	6.59043	0.0144292	1.64691	0.00876138	0.99301	NA	7.47066	5.40003	8.89109	4.59994	7	6	8	5	A930041C12Rik	antisense	chr5	537
ENSMUSG00000074357.3	24.0716	0.835948	0.910449	0.918172	0.358529	NA	21.3447	13.5001	25.5619	35.8795	20	15	23	39	AA386476	bidirectional_promoter_lncRNA	chr8	2407
ENSMUSG00000085946.1	0.225001	-1.24388	4.96736	-0.250411	0.802269	NA	0	0.900005	0	0	0	1	0	0	AA387200	antisense	chr2	1177
ENSMUSG00000084381.1	7.37482	-0.681588	1.57184	-0.433624	0.664562	NA	11.7396	6.30004	7.7797	3.67995	11	7	7	4	AA413626	processed_pseudogene	chr11	494
ENSMUSG00000083307.1	7.65229	-1.04181	1.64677	-0.632641	0.526968	NA	8.5379	9.00005	1.11139	11.9598	8	10	1	13	AA414768	processed_pseudogene	chrX	1257
ENSMUSG00000093483.1	20.6055	0.163499	0.958715	0.17054	0.864586	NA	18.143	20.7001	23.3391	20.2397	17	23	21	22	AA465934	processed_transcript	chr11	711
ENSMUSG00000033213.16	3184.94	-0.154875	0.15485	-1.00016	0.317231	0.999934	3436.5	3276.02	3015.19	3012.04	3220	3640	2713	3274	AA467197	protein_coding	chr2	1203
ENSMUSG00000073867.2	22.6795	-0.0408976	0.920666	-0.0444218	0.964568	NA	21.3447	24.3001	26.6733	18.3998	20	27	24	20	AA474408	TEC	chr7	3339
ENSMUSG00000097345.1	16.5864	1.03535	1.076	0.96222	0.335939	NA	8.5379	13.5001	22.2277	22.0797	8	15	20	24	AA543186	lincRNA	chr2	1696
ENSMUSG00000073497.6	0.266809	-1.24165	4.96683	-0.249988	0.802597	NA	1.06724	0	0	0	1	0	0	0	AA792892	protein_coding	chr5	2043
ENSMUSG00000103149.1	4.69964	0.817668	1.93195	0.423234	0.672124	NA	3.20171	3.60002	5.55693	6.43992	3	4	5	7	AA914427	TEC	chr16	1166
ENSMUSG00000042510.7	425.077	-0.519482	0.281149	-1.84771	0.0646443	0.979248	500.534	487.803	261.176	450.794	469	542	235	490	AA986860	protein_coding	chr1	3640
ENSMUSG00000036678.8	218.626	-0.00300796	0.323434	-0.00930008	0.99258	0.999934	214.515	223.201	217.832	218.957	201	248	196	238	Aaas	protein_coding	chr15	2798
ENSMUSG00000029482.4	2517.9	-0.146703	0.175181	-0.837436	0.402348	0.999934	2405.55	2890.82	2535.07	2240.17	2254	3212	2281	2435	Aacs	protein_coding	chr5	3854
ENSMUSG00000027761.4	996.433	0.256221	0.206213	1.24251	0.214049	0.999934	996.8	822.605	1013.58	1152.74	934	914	912	1253	Aadac	protein_coding	chr3	1501
ENSMUSG00000078507.1	0.229997	1.33177	4.96683	0.268132	0.788597	NA	0	0	0	0.919988	0	0	0	1	Aadacl3	protein_coding	chr4	3153
ENSMUSG00000021482.10	1046.72	-0.176285	0.190086	-0.927395	0.353722	0.999934	1246.53	972.006	1124.72	843.629	1168	1080	1012	917	Aaed1	protein_coding	chr13	3850
ENSMUSG00000037257.8	1204.21	-0.10098	0.186047	-0.542768	0.587289	0.999934	1240.13	1250.11	1233.64	1092.95	1162	1389	1110	1188	Aagab	protein_coding	chr9	5681
ENSMUSG00000057230.13	1162.01	0.0522658	0.187416	0.278875	0.78034	0.999934	1054.43	1230.31	1163.62	1199.66	988	1367	1047	1304	Aak1	protein_coding	chr6	21453
ENSMUSG00000035642.16	334.723	-0.127744	0.298697	-0.427671	0.668891	0.999934	374.6	320.402	261.176	382.715	351	356	235	416	Aamdc	protein_coding	chr7	3833
ENSMUSG00000006299.13	1664.02	0.00968157	0.1712	0.0565512	0.954903	0.999934	1677.7	1638.91	1703.75	1635.74	1572	1821	1533	1778	Aamp	protein_coding	chr1	3458
ENSMUSG00000020804.12	0.225001	-1.24388	4.96736	-0.250411	0.802269	NA	0	0.900005	0	0	0	1	0	0	Aanat	protein_coding	chr11	1663
ENSMUSG00000027628.10	524.976	0.0869173	0.23851	0.364417	0.715546	0.999934	511.207	503.103	609.039	476.554	479	559	548	518	Aar2	protein_coding	chr2	3615
ENSMUSG00000031960.14	1820.36	0.0835444	0.168487	0.495851	0.62	0.999934	1700.11	1836.01	1832.68	1912.65	1593	2040	1649	2079	Aars	protein_coding	chr8	9282
ENSMUSG00000023938.8	360.803	0.102026	0.265464	0.384331	0.700733	0.999934	341.516	354.602	368.98	378.115	320	394	332	411	Aars2	protein_coding	chr17	4765
ENSMUSG00000075528.13	14.8337	0.28864	1.1202	0.257669	0.796662	NA	14.9413	11.7001	18.8936	13.7998	14	13	17	15	Aarsd1	protein_coding	chr11	3052
ENSMUSG00000055923.16	212.737	0.14662	0.329557	0.4449	0.656392	0.999934	203.842	198.901	246.728	201.477	191	221	222	219	Aasdh	protein_coding	chr5	8639
ENSMUSG00000025894.11	424.328	0.119876	0.253185	0.473471	0.635877	0.999934	388.474	424.802	459.002	425.034	364	472	413	462	Aasdhppt	protein_coding	chr9	2847
ENSMUSG00000018697.14	417.042	0.146144	0.251756	0.580497	0.561579	0.999934	419.424	372.602	461.225	414.915	393	414	415	451	Aatf	protein_coding	chr11	2869
ENSMUSG00000025375.15	2.58577	0.290396	2.58211	0.112465	0.910455	NA	4.26895	0.900005	3.33416	1.83998	4	1	3	2	Aatk	protein_coding	chr11	7159
ENSMUSG00000057191.13	1.2775	0.556107	3.52201	0.157895	0.87454	NA	1.06724	0.900005	2.22277	0.919988	1	1	2	1	AB124611	protein_coding	chr9	1447
ENSMUSG00000057880.12	6192.41	0.543153	0.152745	3.55595	0.000376611	0.0424424	5389.55	4616.13	8675.48	6088.48	5050	5129	7806	6618	Abat	protein_coding	chr16	7748
ENSMUSG00000015243.4	133.413	-0.520245	0.432112	-1.20396	0.228606	0.999934	180.363	133.201	86.6881	133.398	169	148	78	145	Abca1	protein_coding	chr4	10363
ENSMUSG00000050296.14	776.122	-1.11537	1.0655	-1.04681	0.295188	0.999934	951.976	936.905	183.379	1032.23	892	1041	165	1122	Abca12	protein_coding	chr1	14808
ENSMUSG00000004668.14	62.5957	0.64946	0.582201	1.11552	0.264626	0.999934	42.6895	54.0003	91.1336	62.5592	40	60	82	68	Abca13	protein_coding	chr11	19737
ENSMUSG00000062017.15	19.445	0.820095	0.991013	0.827532	0.407936	NA	12.8068	15.3001	26.6733	22.9997	12	17	24	25	Abca14	protein_coding	chr7	5897
ENSMUSG00000054746.18	2.11104	1.2648	2.90172	0.435879	0.662924	NA	1.06724	0.900005	5.55693	0.919988	1	1	5	1	Abca15	protein_coding	chr7	5554
ENSMUSG00000035435.16	0.774653	1.30561	4.75965	0.274308	0.783848	NA	1.06724	0	1.11139	0.919988	1	0	1	1	Abca17	protein_coding	chr17	5317
ENSMUSG00000026944.18	171.777	0.0928459	0.36807	0.25225	0.800848	0.999934	167.556	162.901	147.814	208.837	157	181	133	227	Abca2	protein_coding	chr2	8346
ENSMUSG00000024130.15	1786.74	-0.162997	0.171483	-0.950511	0.341853	0.999934	1874.07	1898.11	1780.44	1594.34	1756	2109	1602	1733	Abca3	protein_coding	chr17	8797
ENSMUSG00000028125.14	0.769657	-1.21863	4.77276	-0.255331	0.798468	NA	1.06724	0.900005	1.11139	0	1	1	1	0	Abca4	protein_coding	chr3	12022
ENSMUSG00000018800.14	48.7435	-0.202932	0.635095	-0.31953	0.749324	0.999934	51.2274	53.1003	45.5668	45.0794	48	59	41	49	Abca5	protein_coding	chr11	11437
ENSMUSG00000035722.15	1718.27	-0.0189896	0.171994	-0.110408	0.912086	0.999934	1636.07	1825.21	1701.53	1710.26	1533	2028	1531	1859	Abca7	protein_coding	chr10	6752
ENSMUSG00000041828.15	0.721808	-1.21757	4.86122	-0.250466	0.802227	NA	1.06724	0.900005	0	0.919988	1	1	0	1	Abca8a	protein_coding	chr11	6272
ENSMUSG00000020620.14	4.20137	-1.98323	2.28305	-0.868675	0.385025	NA	13.8741	0.900005	1.11139	0.919988	13	1	1	1	Abca8b	protein_coding	chr11	7423
ENSMUSG00000041797.7	0.999654	0.0450804	3.90966	0.0115305	0.9908	NA	1.06724	0.900005	1.11139	0.919988	1	1	1	1	Abca9	protein_coding	chr11	8048
ENSMUSG00000031974.8	704.643	-0.215097	0.213157	-1.0091	0.312926	0.999934	736.394	777.604	667.943	636.632	690	864	601	692	Abcb10	protein_coding	chr8	4306
ENSMUSG00000027048.15	0.780694	0.595588	4.88183	0.122001	0.902898	NA	0	0.900005	2.22277	0	0	1	2	0	Abcb11	protein_coding	chr2	5146
ENSMUSG00000040584.8	12147.6	0.397072	0.142399	2.78844	0.00529632	0.268126	11048	9941.46	13730.1	13870.7	10352	11046	12354	15077	Abcb1a	protein_coding	chr5	5480
ENSMUSG00000028970.9	9.91496	1.12473	1.38066	0.814633	0.415282	NA	4.26895	8.10005	8.89109	18.3998	4	9	8	20	Abcb1b	protein_coding	chr5	7990
ENSMUSG00000042476.12	5.85493	0.640357	1.83007	0.349909	0.726407	NA	2.13447	6.30004	12.2252	2.75996	2	7	11	3	Abcb4	protein_coding	chr5	9383
ENSMUSG00000026198.15	82.7716	-0.110098	0.511007	-0.215452	0.829415	0.999934	94.9841	76.5004	66.6831	92.9188	89	85	60	101	Abcb6	protein_coding	chr1	5315
ENSMUSG00000031333.7	1570.11	-0.0960977	0.176845	-0.543399	0.586855	0.999934	1660.62	1583.11	1441.47	1595.26	1556	1759	1297	1734	Abcb7	protein_coding	chrX	5905
ENSMUSG00000028973.18	965.481	-0.0794873	0.205719	-0.386389	0.699209	0.999934	1029.88	950.405	840.208	1041.43	965	1056	756	1132	Abcb8	protein_coding	chr5	4739
ENSMUSG00000029408.13	192.207	0.0246136	0.343391	0.0716781	0.942858	0.999934	165.422	216.901	182.267	204.237	155	241	164	222	Abcb9	protein_coding	chr5	5601
ENSMUSG00000023088.17	1119.07	0.0197012	0.186706	0.10552	0.915963	0.999934	1067.24	1155.61	1081.38	1172.06	1000	1284	973	1274	Abcc1	protein_coding	chr16	15092
ENSMUSG00000032842.13	601.341	-0.101193	0.222932	-0.453917	0.649888	0.999934	599.787	645.304	577.921	582.352	562	717	520	633	Abcc10	protein_coding	chr17	6856
ENSMUSG00000025194.5	26.6766	1.24208	0.862052	1.44084	0.14963	0.999934	18.143	12.6001	51.1237	24.8397	17	14	46	27	Abcc2	protein_coding	chr19	8532
ENSMUSG00000020865.16	6877.55	0.182865	0.147247	1.24189	0.214277	0.999934	6458.92	6413.44	6869.48	7768.38	6052	7126	6181	8444	Abcc3	protein_coding	chr11	5698
ENSMUSG00000032849.14	413.686	0.380019	0.275625	1.37875	0.16797	0.999934	350.054	358.202	581.255	365.235	328	398	523	397	Abcc4	protein_coding	chr14	6389
ENSMUSG00000022822.16	193.69	-0.352191	0.364509	-0.966207	0.333941	0.999934	213.447	214.201	124.475	222.637	200	238	112	242	Abcc5	protein_coding	chr16	10681
ENSMUSG00000030834.7	131.055	-0.439927	0.404196	-1.0884	0.276419	0.999934	180.363	122.401	126.698	94.7588	169	136	114	103	Abcc6	protein_coding	chr7	5721
ENSMUSG00000040136.10	87.8087	-1.08969	0.513273	-2.12303	0.0337515	0.723769	107.791	126.001	35.5643	81.8789	101	140	32	89	Abcc8	protein_coding	chr7	8090
ENSMUSG00000030249.15	0.502848	0.045031	4.99583	0.00901372	0.992808	NA	0	0.900005	1.11139	0	0	1	1	0	Abcc9	protein_coding	chr6	8373
ENSMUSG00000031378.14	413.756	-0.168465	0.253175	-0.665408	0.505789	0.999934	406.617	469.803	375.648	402.955	381	522	338	438	Abcd1	protein_coding	chrX	4192
ENSMUSG00000055782.9	0.75862	-2.9187	4.86115	-0.600414	0.54823	NA	2.13447	0.900005	0	0	2	1	0	0	Abcd2	protein_coding	chr15	5946
ENSMUSG00000028127.10	4908.13	0.0738513	0.152329	0.484816	0.627807	0.999934	4610.46	4928.43	4490	5603.65	4320	5476	4040	6091	Abcd3	protein_coding	chr3	6593
ENSMUSG00000021240.6	239.502	-0.0896629	0.315602	-0.284101	0.776333	0.999934	243.33	249.301	255.619	209.757	228	277	230	228	Abcd4	protein_coding	chr12	8006
ENSMUSG00000058355.8	2222.71	0.0602629	0.163713	0.3681	0.712798	0.999934	2016.01	2340.91	2186.1	2347.81	1889	2601	1967	2552	Abce1	protein_coding	chr8	6004
ENSMUSG00000038762.15	1423.63	0.118011	0.178403	0.661488	0.5083	0.999934	1344.72	1385.11	1535.94	1428.74	1260	1539	1382	1553	Abcf1	protein_coding	chr17	4410
ENSMUSG00000028953.10	719.479	0.00588724	0.222391	0.0264725	0.97888	0.999934	629.67	810.905	739.072	698.271	590	901	665	759	Abcf2	protein_coding	chr5	2569
ENSMUSG00000003234.16	865.672	0.0274879	0.203658	0.134971	0.892635	0.999934	843.117	869.405	936.898	813.269	790	966	843	884	Abcf3	protein_coding	chr16	3558
ENSMUSG00000024030.6	83.1568	-1.16692	0.504184	-2.31447	0.0206419	0.569703	138.741	92.7005	53.3465	47.8394	130	103	48	52	Abcg1	protein_coding	chr17	4066
ENSMUSG00000029802.13	1883.18	0.400048	0.173932	2.30002	0.0214469	0.578945	1624.34	1615.51	1940.48	2352.41	1522	1795	1746	2557	Abcg2	protein_coding	chr6	8153
ENSMUSG00000029299.14	3.13905	-3.69755	2.70332	-1.36778	0.17138	NA	5.33619	6.30004	0	0.919988	5	7	0	1	Abcg3	protein_coding	chr5	3550
ENSMUSG00000032131.16	4.39577	-0.571385	1.99152	-0.28691	0.774182	NA	4.26895	6.30004	3.33416	3.67995	4	7	3	4	Abcg4	protein_coding	chr9	5211
ENSMUSG00000040505.13	215.978	1.00809	0.383012	2.63202	0.00848799	0.34922	134.472	133.201	427.884	168.358	126	148	385	183	Abcg5	protein_coding	chr17	2712
ENSMUSG00000024254.15	73.1439	0.876997	0.530243	1.65395	0.0981375	0.999934	58.698	43.2002	118.918	71.7591	55	48	107	78	Abcg8	protein_coding	chr17	3749
ENSMUSG00000006638.14	72.4318	0.517019	0.528484	0.978307	0.327922	0.999934	59.7653	59.4003	82.2425	88.3188	56	66	74	96	Abhd1	processed_transcript	chr5	1758
ENSMUSG00000033157.17	179.209	-0.465398	0.352068	-1.3219	0.186203	0.999934	218.784	197.101	155.594	145.358	205	219	140	158	Abhd10	protein_coding	chr16	3710
ENSMUSG00000040532.14	909.352	0.0757443	0.197304	0.383897	0.701055	0.999934	861.26	909.905	932.453	933.788	807	1011	839	1015	Abhd11	protein_coding	chr5	2172
ENSMUSG00000085042.8	926.087	0.355267	0.215551	1.64818	0.0993158	0.999934	794.025	816.305	1234.75	859.269	744	907	1111	934	Abhd11os	transcribed_unitary_pseudogene	chr5	701
ENSMUSG00000032046.15	673.024	-0.0373572	0.216319	-0.172695	0.862891	0.999934	727.856	637.204	670.166	656.871	682	708	603	714	Abhd12	protein_coding	chr2	2823
ENSMUSG00000040396.12	1700.75	-0.11359	0.17048	-0.666295	0.505222	0.999934	1746	1789.21	1602.62	1665.18	1636	1988	1442	1810	Abhd13	protein_coding	chr8	5191
ENSMUSG00000042210.17	143.393	-0.261015	0.417549	-0.625112	0.531897	0.999934	165.422	143.101	96.6906	168.358	155	159	87	183	Abhd14a	protein_coding	chr9	2111
ENSMUSG00000042073.15	688.589	-0.112763	0.213775	-0.527486	0.597856	0.999934	780.15	652.504	697.95	623.752	731	725	628	678	Abhd14b	protein_coding	chr9	2671
ENSMUSG00000000686.11	4.23465	0.247082	2.02464	0.122038	0.902869	NA	3.20171	4.50003	5.55693	3.67995	3	5	5	4	Abhd15	protein_coding	chr11	3035
ENSMUSG00000007036.15	871.401	-0.561716	0.206809	-2.71611	0.00660545	0.303368	1032.02	1040.41	785.75	627.432	967	1156	707	682	Abhd16a	protein_coding	chr17	3220
ENSMUSG00000003346.14	998.891	-0.0165762	0.192162	-0.0862619	0.931258	0.999934	1033.09	976.506	1008.03	977.947	968	1085	907	1063	Abhd17a	protein_coding	chr10	1547
ENSMUSG00000047368.3	1459.55	-0.196233	0.185325	-1.05886	0.289663	0.999934	1538.96	1566.91	1185.85	1546.5	1442	1741	1067	1681	Abhd17b	protein_coding	chr19	2475
ENSMUSG00000038459.10	2193.77	0.141153	0.162926	0.866365	0.38629	0.999934	2136.61	2036.71	2345.02	2256.73	2002	2263	2110	2453	Abhd17c	protein_coding	chr7	4606
ENSMUSG00000037818.16	228.716	0.037498	0.328639	0.114101	0.909158	0.999934	237.994	212.401	202.272	262.197	223	236	182	285	Abhd18	protein_coding	chr3	11184
ENSMUSG00000039202.12	9920.33	0.077972	0.141364	0.551567	0.581245	0.999934	9416.23	9891.06	10219.2	10154.8	8823	10990	9195	11038	Abhd2	protein_coding	chr7	10573
ENSMUSG00000002475.15	92.155	-0.0770204	0.49886	-0.154393	0.8773	0.999934	84.3117	98.1006	55.5693	130.638	79	109	50	142	Abhd3	protein_coding	chr18	1962
ENSMUSG00000040997.13	794.071	-0.0945859	0.214887	-0.440165	0.659817	0.999934	932.765	714.604	757.965	770.95	874	794	682	838	Abhd4	protein_coding	chr14	3279
ENSMUSG00000032540.16	677.238	-0.0848193	0.219411	-0.386577	0.699069	0.999934	663.822	729.904	692.393	622.832	622	811	623	677	Abhd5	protein_coding	chr9	5956
ENSMUSG00000025277.14	603.059	0.00835525	0.22243	0.0375635	0.970036	0.999934	520.812	681.304	520.129	689.991	488	757	468	750	Abhd6	protein_coding	chr14	2365
ENSMUSG00000007950.9	188.668	-0.51946	0.351838	-1.47642	0.139832	0.999934	187.834	252.001	113.361	201.477	176	280	102	219	Abhd8	protein_coding	chr8	4079
ENSMUSG00000058835.14	2585.94	-0.0135098	0.158832	-0.0850568	0.932216	0.999934	2669.16	2527.21	2633.98	2513.41	2501	2808	2370	2732	Abi1	protein_coding	chr2	4032
ENSMUSG00000026782.15	37.115	-0.0317576	0.725695	-0.0437616	0.965094	0.999934	33.0844	41.4002	28.896	45.0794	31	46	26	49	Abi2	protein_coding	chr1	8543
ENSMUSG00000018381.15	81.1863	-0.00441118	0.501391	-0.00879788	0.99298	0.999934	90.7152	71.1004	96.6906	66.2391	85	79	87	72	Abi3	protein_coding	chr11	4153
ENSMUSG00000035258.15	7.87576	0.38823	1.51311	0.256577	0.797506	NA	6.40342	7.20004	7.7797	10.1199	6	8	7	11	Abi3bp	protein_coding	chr16	7416
ENSMUSG00000026842.16	1796.07	-0.0362881	0.170203	-0.213205	0.831167	0.999934	1819.64	1816.21	1693.75	1854.7	1705	2018	1524	2016	Abl1	protein_coding	chr2	11596
ENSMUSG00000026596.13	633.93	-0.209641	0.218906	-0.95768	0.338224	0.999934	715.049	645.304	606.817	568.553	670	717	546	618	Abl2	protein_coding	chr1	10800
ENSMUSG00000025085.16	2827.48	0.166454	0.158868	1.04775	0.294754	0.999934	2816.44	2517.31	3001.85	2974.32	2639	2797	2701	3233	Ablim1	protein_coding	chr19	11949
ENSMUSG00000029095.17	147.34	-1.30585	0.394827	-3.30739	0.000941711	0.0821445	226.254	193.501	76.6856	92.9188	212	215	69	101	Ablim2	protein_coding	chr5	7047
ENSMUSG00000015787.15	284.174	0.367519	0.29543	1.24401	0.213495	0.999934	242.263	252.901	348.975	292.556	227	281	314	318	Abo	protein_coding	chr2	1920
ENSMUSG00000017631.18	4117.34	0.255963	0.150592	1.69972	0.0891844	0.999934	3614.73	3886.22	4201.04	4767.38	3387	4318	3780	5182	Abr	protein_coding	chr11	9730
ENSMUSG00000042895.6	0.277846	1.334	4.96736	0.268553	0.788274	NA	0	0	1.11139	0	0	0	1	0	Abra	protein_coding	chr15	2979
ENSMUSG00000078453.3	732.019	-0.127816	0.211243	-0.605065	0.545136	0.999934	768.411	758.704	746.851	654.111	720	843	672	711	Abracl	protein_coding	chr10	1056
ENSMUSG00000035234.18	163.215	0.0419942	0.368374	0.113999	0.909239	0.999934	159.018	162.001	180.045	151.798	149	180	162	165	Abraxas1	protein_coding	chr5	3011
ENSMUSG00000030965.19	657.002	0.024771	0.216359	0.114491	0.908849	0.999934	651.015	651.604	671.277	654.111	610	724	604	711	Abraxas2	protein_coding	chr7	8421
ENSMUSG00000036376.3	207.675	-0.163775	0.33064	-0.495327	0.620369	0.999934	220.918	217.801	203.384	188.598	207	242	183	205	Abt1	protein_coding	chr13	4456
ENSMUSG00000030083.11	417.704	0.183826	0.259944	0.707176	0.479457	0.999934	440.769	344.702	434.552	450.794	413	383	391	490	Abtb1	protein_coding	chr6	4862
ENSMUSG00000032724.5	234.73	1.25525	0.360228	3.4846	0.000492877	0.0523581	120.598	149.401	427.884	241.037	113	166	385	262	Abtb2	protein_coding	chr2	6032
ENSMUSG00000117176.1	0.277846	1.334	4.96736	0.268553	0.788274	NA	0	0	1.11139	0	0	0	1	0	AC026385.1	processed_pseudogene	chr17	453
ENSMUSG00000110773.1	3.33335	-0.889956	2.31057	-0.385168	0.700113	NA	7.47066	1.80001	2.22277	1.83998	7	2	2	2	AC061963.1	antisense	chr9	2354
ENSMUSG00000117245.1	6.25474	-0.561473	1.69211	-0.331817	0.740027	NA	7.47066	7.20004	6.66831	3.67995	7	8	6	4	AC073683.1	lincRNA	chr17	637
ENSMUSG00000117231.1	6.2918	0.627198	1.683	0.372666	0.709397	NA	5.33619	4.50003	8.89109	6.43992	5	5	8	7	AC079441.1	processed_transcript	chr17	3748
ENSMUSG00000116825.1	0.957846	0.848179	4.33423	0.195693	0.84485	NA	0	1.80001	1.11139	0.919988	0	2	1	1	AC083895.1	processed_pseudogene	chr16	880
ENSMUSG00000116714.1	0.454998	0.0444687	4.88765	0.00909818	0.992741	NA	0	0.900005	0	0.919988	0	1	0	1	AC087556.1	antisense	chr16	509
ENSMUSG00000116561.1	0.732845	1.31069	4.86178	0.26959	0.787476	NA	0	0.900005	1.11139	0.919988	0	1	1	1	AC087802.1	processed_pseudogene	chr16	665
ENSMUSG00000116936.1	0.774653	1.30561	4.75965	0.274308	0.783848	NA	1.06724	0	1.11139	0.919988	1	0	1	1	AC087802.4	processed_pseudogene	chr16	518
ENSMUSG00000116604.1	5.55187	1.23934	1.88758	0.656576	0.511453	NA	7.47066	0.900005	5.55693	8.27989	7	1	5	9	AC087898.2	lincRNA	chr16	2151
ENSMUSG00000116764.1	0.266809	-1.24165	4.96683	-0.249988	0.802597	NA	1.06724	0	0	0	1	0	0	0	AC087898.3	antisense	chr16	428
ENSMUSG00000117197.1	0.266809	-1.24165	4.96683	-0.249988	0.802597	NA	1.06724	0	0	0	1	0	0	0	AC087901.1	processed_pseudogene	chr17	1127
ENSMUSG00000117047.1	0.229997	1.33177	4.96683	0.268132	0.788597	NA	0	0	0	0.919988	0	0	0	1	AC091332.1	processed_pseudogene	chr17	640
ENSMUSG00000116754.1	0.266809	-1.24165	4.96683	-0.249988	0.802597	NA	1.06724	0	0	0	1	0	0	0	AC093479.1	lincRNA	chr16	995
ENSMUSG00000116975.1	0.277846	1.334	4.96736	0.268553	0.788274	NA	0	0	1.11139	0	0	0	1	0	AC097366.1	lincRNA	chr17	1734
ENSMUSG00000116615.1	0.496806	0.0450723	4.9968	0.00902022	0.992803	NA	1.06724	0	0	0.919988	1	0	0	1	AC098641.1	processed_transcript	chr17	914
ENSMUSG00000116852.1	3.01499	1.04508	2.37937	0.439225	0.660498	NA	2.13447	1.80001	4.44554	3.67995	2	2	4	4	AC098838.1	lincRNA	chr17	562
ENSMUSG00000117183.1	211.329	0.0859208	0.328693	0.261401	0.793783	0.999934	211.313	198.901	213.386	221.717	198	221	192	241	AC098880.2	processed_pseudogene	chr17	2370
ENSMUSG00000116959.1	1.73145	2.03413	3.42272	0.594301	0.552311	NA	2.13447	0	1.11139	3.67995	2	0	1	4	AC098883.3	TEC	chr16	3276
ENSMUSG00000116545.1	0.454998	0.0444687	4.88765	0.00909818	0.992741	NA	0	0.900005	0	0.919988	0	1	0	1	AC102745.1	processed_pseudogene	chr17	1349
ENSMUSG00000117221.1	0.266809	-1.24165	4.96683	-0.249988	0.802597	NA	1.06724	0	0	0	1	0	0	0	AC104866.2	lincRNA	chr17	3128
ENSMUSG00000117102.1	0.277846	1.334	4.96736	0.268553	0.788274	NA	0	0	1.11139	0	0	0	1	0	AC107792.3	TEC	chr17	3039
ENSMUSG00000116665.1	0.769657	-1.21863	4.77276	-0.255331	0.798468	NA	1.06724	0.900005	1.11139	0	1	1	1	0	AC110166.1	antisense	chr16	3755
ENSMUSG00000116840.1	1.0057	0.0450973	4.65769	0.00968233	0.992275	NA	0	1.80001	2.22277	0	0	2	2	0	AC110166.2	antisense	chr16	2874
ENSMUSG00000116845.1	0.450003	-1.81261	4.93254	-0.367481	0.71326	NA	0	1.80001	0	0	0	2	0	0	AC110241.1	processed_pseudogene	chr16	249
ENSMUSG00000117249.1	0.229997	1.33177	4.96683	0.268132	0.788597	NA	0	0	0	0.919988	0	0	0	1	AC110514.2	processed_pseudogene	chr17	372
ENSMUSG00000116779.1	0.454998	0.0444687	4.88765	0.00909818	0.992741	NA	0	0.900005	0	0.919988	0	1	0	1	AC110534.2	processed_pseudogene	chr17	594
ENSMUSG00000116995.1	199.954	-0.0505755	0.342193	-0.147798	0.882502	0.999934	203.842	200.701	227.834	167.438	191	223	205	182	AC110534.5	transcribed_processed_pseudogene	chr17	2478
ENSMUSG00000116743.1	1.03647	-1.66405	4.19699	-0.396486	0.691747	NA	2.13447	0.900005	1.11139	0	2	1	1	0	AC110573.1	processed_transcript	chr16	717
ENSMUSG00000116902.1	21.5714	-0.0760487	0.939546	-0.0809419	0.935488	NA	26.6809	17.1001	27.7846	14.7198	25	19	25	16	AC112155.1	TEC	chr16	3804
ENSMUSG00000117292.1	1.22466	-0.465463	3.57858	-0.130069	0.896512	NA	1.06724	1.80001	1.11139	0.919988	1	2	1	1	AC112949.1	lincRNA	chr17	4664
ENSMUSG00000116898.1	2.18041	0.565498	3.36132	0.168237	0.866397	NA	3.20171	0	0	5.51993	3	0	0	6	AC113006.1	bidirectional_promoter_lncRNA	chr16	337
ENSMUSG00000115247.1	0.555693	1.90274	4.93253	0.385753	0.69968	NA	0	0	2.22277	0	0	0	2	0	AC113125.1	processed_pseudogene	chr14	1774
ENSMUSG00000115902.1	5.5986	0.347719	1.78146	0.195187	0.845246	NA	4.26895	5.40003	4.44554	8.27989	4	6	4	9	AC113595.1	antisense	chr15	3589
ENSMUSG00000116862.1	1.07827	-0.794128	4.49119	-0.176819	0.859651	NA	3.20171	0	1.11139	0	3	0	1	0	AC114990.2	lincRNA	chr16	933
ENSMUSG00000117327.1	23.7785	-0.301269	0.899301	-0.335003	0.737623	NA	26.6809	25.2001	26.6733	16.5598	25	28	24	18	AC114990.3	pseudogene	chr16	609
ENSMUSG00000116804.1	0.266809	-1.24165	4.96683	-0.249988	0.802597	NA	1.06724	0	0	0	1	0	0	0	AC115797.3	processed_pseudogene	chr17	1267
ENSMUSG00000116958.1	0.496806	0.0450723	4.9968	0.00902022	0.992803	NA	1.06724	0	0	0.919988	1	0	0	1	AC115797.5	processed_pseudogene	chr17	685
ENSMUSG00000116875.1	12.617	-0.142062	1.21017	-0.11739	0.906551	NA	13.8741	12.6001	11.1139	12.8798	13	14	10	14	AC115954.1	processed_pseudogene	chr16	969
ENSMUSG00000117008.1	0.769657	-1.21863	4.77276	-0.255331	0.798468	NA	1.06724	0.900005	1.11139	0	1	1	1	0	AC115970.1	unitary_pseudogene	chr10	2008
ENSMUSG00000112365.1	0.507843	2.4877	4.89227	0.508496	0.611106	NA	0	0	1.11139	0.919988	0	0	1	1	AC117232.1	lincRNA	chr10	338
ENSMUSG00000117163.1	0.229997	1.33177	4.96683	0.268132	0.788597	NA	0	0	0	0.919988	0	0	0	1	AC117257.1	processed_pseudogene	chr17	864
ENSMUSG00000116821.1	7.74195	-0.739278	1.59175	-0.464444	0.64233	NA	9.60514	8.10005	2.22277	11.0399	9	9	2	12	AC117662.2	processed_pseudogene	chr16	1524
ENSMUSG00000116961.1	0.983621	-3.39754	4.6633	-0.72857	0.466265	NA	2.13447	1.80001	0	0	2	2	0	0	AC117662.4	lincRNA	chr16	1172
ENSMUSG00000116699.1	0.277846	1.334	4.96736	0.268553	0.788274	NA	0	0	1.11139	0	0	0	1	0	AC118240.2	lincRNA	chr16	615
ENSMUSG00000116557.1	0.459994	1.89962	4.93227	0.385141	0.700133	NA	0	0	0	1.83998	0	0	0	2	AC118542.1	lincRNA	chr16	3284
ENSMUSG00000117264.1	0.229997	1.33177	4.96683	0.268132	0.788597	NA	0	0	0	0.919988	0	0	0	1	AC120779.1	processed_transcript	chr17	1254
ENSMUSG00000116757.1	9.99863	-0.267112	1.37985	-0.19358	0.846504	NA	8.5379	12.6001	13.3366	5.51993	8	14	12	6	AC121151.1	processed_pseudogene	chr17	798
ENSMUSG00000117035.1	0.266809	-1.24165	4.96683	-0.249988	0.802597	NA	1.06724	0	0	0	1	0	0	0	AC121600.1	lincRNA	chr17	2586
ENSMUSG00000116796.1	15.0838	-0.566321	1.13042	-0.500984	0.616383	NA	17.0758	18.0001	7.7797	17.4798	16	20	7	19	AC121795.2	TEC	chr17	1094
ENSMUSG00000117062.1	0.277846	1.334	4.96736	0.268553	0.788274	NA	0	0	1.11139	0	0	0	1	0	AC121875.1	processed_pseudogene	chr17	949
ENSMUSG00000116820.1	37.9421	-0.663255	0.71811	-0.923612	0.355689	0.999934	46.9584	45.9003	32.2302	26.6796	44	51	29	29	AC122217.2	processed_pseudogene	chr16	564
ENSMUSG00000111740.1	64.4894	0.334349	0.57282	0.583689	0.559429	0.999934	46.9584	67.5004	80.0198	63.4792	44	75	72	69	AC122335.1	TEC	chr10	6181
ENSMUSG00000116678.1	2.13077	0.946686	3.10394	0.304995	0.76037	NA	4.26895	0	3.33416	0.919988	4	0	3	1	AC122392.1	processed_pseudogene	chr16	465
ENSMUSG00000116618.1	3.40112	-0.403703	2.24306	-0.179979	0.857169	NA	3.20171	4.50003	2.22277	3.67995	3	5	2	4	AC122413.1	antisense	chr17	667
ENSMUSG00000116876.1	0.946809	-1.66636	4.35035	-0.383041	0.701689	NA	1.06724	1.80001	0	0.919988	1	2	0	1	AC122413.2	protein_coding	chr17	2610
ENSMUSG00000117241.1	1.26646	-0.465288	3.53353	-0.131678	0.895239	NA	2.13447	0.900005	1.11139	0.919988	2	1	1	1	AC122481.1	processed_pseudogene	chr17	1963
ENSMUSG00000117248.1	2.30897	-1.97559	3.00566	-0.65729	0.510995	NA	3.20171	2.70002	3.33416	0	3	3	3	0	AC122481.2	processed_pseudogene	chr17	310
ENSMUSG00000117069.1	2.05215	0.829374	2.8492	0.29109	0.770983	NA	2.13447	0.900005	3.33416	1.83998	2	1	3	2	AC122487.1	lincRNA	chr17	1128
ENSMUSG00000116809.1	1.35612	-0.274858	4.04901	-0.0678828	0.945879	NA	3.20171	0	2.22277	0	3	0	2	0	AC122538.1	TEC	chr16	4080
ENSMUSG00000116881.1	0.266809	-1.24165	4.96683	-0.249988	0.802597	NA	1.06724	0	0	0	1	0	0	0	AC122538.2	TEC	chr16	2900
ENSMUSG00000110869.1	13.9729	-0.430783	1.17203	-0.367554	0.713206	NA	24.5465	9.00005	12.2252	10.1199	23	10	11	11	AC122901.1	TEC	chr10	1790
ENSMUSG00000113687.1	2.08397	-1.64229	3.12086	-0.526229	0.598729	NA	3.20171	1.80001	3.33416	0	3	2	3	0	AC123705.1	TEC	chr12	2069
ENSMUSG00000116972.1	22.7859	0.223247	0.912493	0.244656	0.806722	NA	21.3447	20.7001	23.3391	25.7597	20	23	21	28	AC123956.1	processed_pseudogene	chr16	772
ENSMUSG00000117001.1	1.21362	-2.19902	3.91655	-0.56147	0.574477	NA	2.13447	1.80001	0	0.919988	2	2	0	1	AC124237.1	processed_pseudogene	chr17	1296
ENSMUSG00000116739.1	6.43294	-0.878882	1.69708	-0.517879	0.604543	NA	6.40342	9.90006	6.66831	2.75996	6	11	6	3	AC124681.2	sense_intronic	chr16	293
ENSMUSG00000116705.1	0.266809	-1.24165	4.96683	-0.249988	0.802597	NA	1.06724	0	0	0	1	0	0	0	AC124739.1	lincRNA	chr12	393
ENSMUSG00000116775.1	0.555693	1.90274	4.93253	0.385753	0.69968	NA	0	0	2.22277	0	0	0	2	0	AC124739.2	lincRNA	chr12	633
ENSMUSG00000116912.1	8.65645	0.479309	1.44806	0.331001	0.740644	NA	6.40342	8.10005	10.0025	10.1199	6	9	9	11	AC125028.1	processed_pseudogene	chr16	2157
ENSMUSG00000116879.1	0.684995	0.570179	4.85336	0.117481	0.906479	NA	0	0.900005	0	1.83998	0	1	0	2	AC125141.3	lincRNA	chr17	13039
ENSMUSG00000116547.1	0.225001	-1.24388	4.96736	-0.250411	0.802269	NA	0	0.900005	0	0	0	1	0	0	AC125199.1	processed_pseudogene	chr16	625
ENSMUSG00000113184.1	48.9862	-0.179077	0.634514	-0.282228	0.777769	0.999934	44.824	59.4003	41.1213	50.5993	42	66	37	55	AC125351.1	lincRNA	chr12	2223
ENSMUSG00000116572.1	0.544656	0.0456629	4.88765	0.00934252	0.992546	NA	1.06724	0	1.11139	0	1	0	1	0	AC125371.1	lincRNA	chr16	2301
ENSMUSG00000116733.1	11.5032	1.09795	1.28442	0.85482	0.392651	NA	9.60514	5.40003	14.448	16.5598	9	6	13	18	AC125396.2	bidirectional_promoter_lncRNA	chr16	1130
ENSMUSG00000116735.1	0.533619	-1.8095	4.93228	-0.366869	0.713717	NA	2.13447	0	0	0	2	0	0	0	AC126030.1	TEC	chr16	2795
ENSMUSG00000116888.1	0.229997	1.33177	4.96683	0.268132	0.788597	NA	0	0	0	0.919988	0	0	0	1	AC126030.2	TEC	chr16	1276
ENSMUSG00000117216.1	0.450003	-1.81261	4.93254	-0.367481	0.71326	NA	0	1.80001	0	0	0	2	0	0	AC126040.2	antisense	chr17	547
ENSMUSG00000116781.1	9.50078	-0.112388	1.39648	-0.0804795	0.935856	NA	8.5379	10.8001	12.2252	6.43992	8	12	11	7	AC126055.2	TEC	chr16	1369
ENSMUSG00000115785.1	0.763616	-0.504653	4.88437	-0.10332	0.917709	NA	2.13447	0	0	0.919988	2	0	0	1	AC126250.1	TEC	chr14	1768
ENSMUSG00000117089.1	0.459994	1.89962	4.93227	0.385141	0.700133	NA	0	0	0	1.83998	0	0	0	2	AC126254.1	processed_pseudogene	chr17	420
ENSMUSG00000116581.1	3.46395	0.838426	2.23878	0.374501	0.708032	NA	3.20171	1.80001	3.33416	5.51993	3	2	3	6	AC126280.1	lincRNA	chr16	2960
ENSMUSG00000116632.1	48.155	-0.0904098	0.643803	-0.140431	0.88832	0.999934	55.4963	44.1002	43.344	49.6793	52	49	39	54	AC126457.1	transcribed_processed_pseudogene	chr16	1455
ENSMUSG00000117028.1	2.49112	-0.539873	2.58059	-0.209205	0.834288	NA	3.20171	2.70002	2.22277	1.83998	3	3	2	2	AC126937.1	antisense	chr17	1064
ENSMUSG00000117171.1	9.55	1.12678	1.40438	0.802333	0.42236	NA	8.5379	3.60002	17.7822	8.27989	8	4	16	9	AC126937.2	bidirectional_promoter_lncRNA	chr17	3026
ENSMUSG00000117199.1	0.266809	-1.24165	4.96683	-0.249988	0.802597	NA	1.06724	0	0	0	1	0	0	0	AC126942.2	lincRNA	chr17	678
ENSMUSG00000116657.1	23.7297	-0.0446712	0.90007	-0.0496308	0.960417	NA	32.0171	17.1001	25.5619	20.2397	30	19	23	22	AC127341.3	antisense	chr17	10812
ENSMUSG00000116884.1	2.10284	1.54307	3.10421	0.497089	0.619126	NA	0	2.70002	1.11139	4.59994	0	3	1	5	AC127341.5	antisense	chr17	1111
ENSMUSG00000117048.1	9.60456	1.24311	1.41886	0.876133	0.380958	NA	3.20171	9.00005	13.3366	12.8798	3	10	12	14	AC127690.2	lincRNA	chr17	2982
ENSMUSG00000116740.1	0.459994	1.89962	4.93227	0.385141	0.700133	NA	0	0	0	1.83998	0	0	0	2	AC129203.1	TEC	chr16	2042
ENSMUSG00000116832.1	0.491811	-2.39757	4.89228	-0.490072	0.624083	NA	1.06724	0.900005	0	0	1	1	0	0	AC129203.3	TEC	chr16	3669
ENSMUSG00000116626.1	125.796	-0.40388	0.413062	-0.977771	0.328188	0.999934	127.001	160.201	105.582	110.399	119	178	95	120	AC129214.1	TEC	chr16	5219
ENSMUSG00000116778.1	0.277846	1.334	4.96736	0.268553	0.788274	NA	0	0	1.11139	0	0	0	1	0	AC129214.2	processed_pseudogene	chr16	770
ENSMUSG00000116802.1	178.004	-0.0708715	0.361384	-0.196111	0.844523	0.999934	180.363	181.801	204.495	145.358	169	202	184	158	AC129328.1	lincRNA	chr17	2322
ENSMUSG00000116529.1	3.39008	-1.05675	2.29012	-0.461437	0.644485	NA	4.26895	4.50003	1.11139	3.67995	4	5	1	4	AC129539.1	processed_pseudogene	chr16	571
ENSMUSG00000116549.1	0.684995	0.570179	4.85336	0.117481	0.906479	NA	0	0.900005	0	1.83998	0	1	0	2	AC129574.1	processed_pseudogene	chr16	232
ENSMUSG00000116639.1	30.7764	-0.669637	0.792626	-0.844833	0.398204	0.999934	40.555	35.1002	24.4505	22.9997	38	39	22	25	AC129574.2	TEC	chr16	1773
ENSMUSG00000116976.1	0.277846	1.334	4.96736	0.268553	0.788274	NA	0	0	1.11139	0	0	0	1	0	AC130529.1	processed_transcript	chr16	6073
ENSMUSG00000116617.1	1.2825	2.28629	3.83304	0.59647	0.550862	NA	1.06724	0	2.22277	1.83998	1	0	2	2	AC130815.1	lincRNA	chr16	3519
ENSMUSG00000116946.1	50.3854	1.01244	0.651144	1.55486	0.11998	0.999934	29.8826	35.1002	87.7995	48.7594	28	39	79	53	AC130815.2	lincRNA	chr16	4634
ENSMUSG00000116707.1	7.40861	-0.0228658	1.57501	-0.0145179	0.988417	NA	4.26895	10.8001	4.44554	10.1199	4	12	4	11	AC130844.1	TEC	chr16	2713
ENSMUSG00000116656.1	6.42585	-0.658185	1.66951	-0.394239	0.693405	NA	8.5379	7.20004	4.44554	5.51993	8	8	4	6	AC131339.2	processed_transcript	chr16	1932
ENSMUSG00000116571.1	2.09501	-1.22959	3.14202	-0.391338	0.695547	NA	2.13447	1.80001	4.44554	0	2	2	4	0	AC131800.1	bidirectional_promoter_lncRNA	chr17	769
ENSMUSG00000116536.1	3.54257	0.754735	2.26231	0.333613	0.738672	NA	5.33619	0.900005	3.33416	4.59994	5	1	3	5	AC132099.1	processed_pseudogene	chr16	514
ENSMUSG00000117077.1	0.507843	2.4877	4.89227	0.508496	0.611106	NA	0	0	1.11139	0.919988	0	0	1	1	AC132235.1	processed_pseudogene	chr17	584
ENSMUSG00000117130.1	11.1296	0.733765	1.29936	0.564714	0.572269	NA	5.33619	11.7001	10.0025	17.4798	5	13	9	19	AC132460.2	sense_intronic	chr17	767
ENSMUSG00000117263.1	0.225001	-1.24388	4.96736	-0.250411	0.802269	NA	0	0.900005	0	0	0	1	0	0	AC132460.3	antisense	chr17	1298
ENSMUSG00000117228.1	0.277846	1.334	4.96736	0.268553	0.788274	NA	0	0	1.11139	0	0	0	1	0	AC132911.2	processed_pseudogene	chr17	713
ENSMUSG00000116842.1	4.32431	0.140978	2.0099	0.0701421	0.944081	NA	4.26895	3.60002	6.66831	2.75996	4	4	6	3	AC133487.1	TEC	chr16	4490
ENSMUSG00000116594.1	54.9521	-0.0780336	0.601239	-0.129788	0.896734	0.999934	61.8998	50.4003	63.349	44.1594	58	56	57	48	AC133488.1	protein_coding	chr16	3430
ENSMUSG00000114053.1	2.35361	-1.60125	2.96034	-0.540901	0.588576	NA	2.13447	3.60002	0	3.67995	2	4	0	4	AC133498.1	lincRNA	chr13	4402
ENSMUSG00000114147.1	17.3032	-0.35938	1.06438	-0.337644	0.735632	NA	23.4792	15.3001	11.1139	19.3197	22	17	10	21	AC134468.1	transcribed_processed_pseudogene	chr12	1305
ENSMUSG00000116607.1	0.769657	-1.21863	4.77276	-0.255331	0.798468	NA	1.06724	0.900005	1.11139	0	1	1	1	0	AC134560.2	bidirectional_promoter_lncRNA	chr16	662
ENSMUSG00000116836.1	0.266809	-1.24165	4.96683	-0.249988	0.802597	NA	1.06724	0	0	0	1	0	0	0	AC134560.3	TEC	chr16	2579
ENSMUSG00000116810.1	0.229997	1.33177	4.96683	0.268132	0.788597	NA	0	0	0	0.919988	0	0	0	1	AC135964.1	lincRNA	chr16	2294
ENSMUSG00000116562.1	1.72146	-0.441893	3.06174	-0.144328	0.885242	NA	2.13447	1.80001	1.11139	1.83998	2	2	1	2	AC139060.1	processed_pseudogene	chr16	250
ENSMUSG00000117238.1	0.454998	0.0444687	4.88765	0.00909818	0.992741	NA	0	0.900005	0	0.919988	0	1	0	1	AC139131.1	processed_transcript	chr7	7600
ENSMUSG00000116829.1	1.22965	0.555084	3.57307	0.155352	0.876544	NA	1.06724	0.900005	1.11139	1.83998	1	1	1	2	AC139573.2	processed_pseudogene	chr16	511
ENSMUSG00000117255.1	10.6209	-0.2743	1.31961	-0.207865	0.835335	NA	12.8068	9.90006	13.3366	6.43992	12	11	12	7	AC140278.1	bidirectional_promoter_lncRNA	chr17	2130
ENSMUSG00000116551.1	0.266809	-1.24165	4.96683	-0.249988	0.802597	NA	1.06724	0	0	0	1	0	0	0	AC140300.1	lincRNA	chr17	654
ENSMUSG00000116620.1	8.64967	-0.138311	1.4904	-0.0928013	0.926061	NA	7.47066	9.00005	14.448	3.67995	7	10	13	4	AC140300.2	processed_pseudogene	chr17	490
ENSMUSG00000116846.1	0.675004	-2.14938	4.91948	-0.436911	0.662176	NA	0	2.70002	0	0	0	3	0	0	AC140346.1	lincRNA	chr16	536
ENSMUSG00000116819.1	5.55896	0.579836	1.78329	0.32515	0.745067	NA	5.33619	3.60002	7.7797	5.51993	5	4	7	6	AC140457.1	bidirectional_promoter_lncRNA	chr12	432
ENSMUSG00000114888.1	31.3145	0.0171696	0.785229	0.0218657	0.982555	0.999934	25.6137	36.9002	27.7846	34.9595	24	41	25	38	AC140462.1	TEC	chr14	2433
ENSMUSG00000116608.1	1.97353	2.3587	3.19551	0.73813	0.460435	NA	0	1.80001	3.33416	2.75996	0	2	3	3	AC144408.1	lincRNA	chr16	720
ENSMUSG00000116747.1	6.69396	0.381791	1.63202	0.233937	0.815034	NA	5.33619	6.30004	7.7797	7.3599	5	7	7	8	AC144408.2	lincRNA	chr16	624
ENSMUSG00000116930.1	0.769657	-1.21863	4.77276	-0.255331	0.798468	NA	1.06724	0.900005	1.11139	0	1	1	1	0	AC144408.3	protein_coding	chr16	1268
ENSMUSG00000117270.1	0.225001	-1.24388	4.96736	-0.250411	0.802269	NA	0	0.900005	0	0	0	1	0	0	AC144797.1	lincRNA	chr16	1948
ENSMUSG00000117289.1	0.78569	3.01093	4.86092	0.619417	0.535642	NA	0	0	2.22277	0.919988	0	0	2	1	AC144797.2	bidirectional_promoter_lncRNA	chr16	647
ENSMUSG00000116968.1	0.277846	1.334	4.96736	0.268553	0.788274	NA	0	0	1.11139	0	0	0	1	0	AC145744.1	lincRNA	chr16	1281
ENSMUSG00000116987.1	0.454998	0.0444687	4.88765	0.00909818	0.992741	NA	0	0.900005	0	0.919988	0	1	0	1	AC150035.3	lincRNA	chr16	1004
ENSMUSG00000111478.1	0.225001	-1.24388	4.96736	-0.250411	0.802269	NA	0	0.900005	0	0	0	1	0	0	AC150314.1	processed_pseudogene	chr10	238
ENSMUSG00000117185.1	0.732845	1.31069	4.86178	0.26959	0.787476	NA	0	0.900005	1.11139	0.919988	0	1	1	1	AC151292.1	antisense	chr17	605
ENSMUSG00000116614.1	2.81577	0.573744	2.48336	0.231035	0.817288	NA	4.26895	0.900005	3.33416	2.75996	4	1	3	3	AC151299.1	processed_pseudogene	chr17	471
ENSMUSG00000116627.1	3.58543	0.158726	2.19858	0.0721949	0.942447	NA	5.33619	1.80001	4.44554	2.75996	5	2	4	3	AC153140.1	lincRNA	chr12	1230
ENSMUSG00000111913.1	0.454998	0.0444687	4.88765	0.00909818	0.992741	NA	0	0.900005	0	0.919988	0	1	0	1	AC153498.1	TEC	chr10	2722
ENSMUSG00000117079.1	0.229997	1.33177	4.96683	0.268132	0.788597	NA	0	0	0	0.919988	0	0	0	1	AC154187.1	lincRNA	chr17	2943
ENSMUSG00000117098.1	16.0176	0.137043	1.08885	0.12586	0.899843	NA	13.8741	16.2001	21.1163	12.8798	13	18	19	14	AC154187.2	protein_coding	chr17	1201
ENSMUSG00000116872.1	0.225001	-1.24388	4.96736	-0.250411	0.802269	NA	0	0.900005	0	0	0	1	0	0	AC154188.1	transcribed_unprocessed_pseudogene	chr16	3281
ENSMUSG00000116590.1	0.822502	0.571405	4.8531	0.11774	0.906274	NA	1.06724	0	2.22277	0	1	0	2	0	AC154200.1	lincRNA	chr17	2755
ENSMUSG00000116928.1	0.732845	1.31069	4.86178	0.26959	0.787476	NA	0	0.900005	1.11139	0.919988	0	1	1	1	AC154201.1	processed_pseudogene	chr16	526
ENSMUSG00000117315.1	0.496806	0.0450723	4.9968	0.00902022	0.992803	NA	1.06724	0	0	0.919988	1	0	0	1	AC154218.2	lincRNA	chr17	1562
ENSMUSG00000116908.1	547.061	-0.111968	0.234168	-0.47815	0.632544	0.999934	562.434	571.503	470.116	584.192	527	635	423	635	AC154232.2	TEC	chr16	5095
ENSMUSG00000117191.1	0.277846	1.334	4.96736	0.268553	0.788274	NA	0	0	1.11139	0	0	0	1	0	AC154244.1	lincRNA	chr17	669
ENSMUSG00000117039.1	23.2734	0.051656	0.908411	0.0568642	0.954653	NA	18.143	27.0002	16.6708	31.2796	17	30	15	34	AC154258.1	TEC	chr16	2390
ENSMUSG00000116864.1	0.496806	0.0450723	4.9968	0.00902022	0.992803	NA	1.06724	0	0	0.919988	1	0	0	1	AC154306.1	processed_pseudogene	chr17	1031
ENSMUSG00000116718.1	0.225001	-1.24388	4.96736	-0.250411	0.802269	NA	0	0.900005	0	0	0	1	0	0	AC154378.1	lincRNA	chr17	2109
ENSMUSG00000116949.1	0.225001	-1.24388	4.96736	-0.250411	0.802269	NA	0	0.900005	0	0	0	1	0	0	AC154378.2	processed_pseudogene	chr17	1640
ENSMUSG00000115281.1	0.229997	1.33177	4.96683	0.268132	0.788597	NA	0	0	0	0.919988	0	0	0	1	AC154412.1	TEC	chr14	2786
ENSMUSG00000116814.1	0.266809	-1.24165	4.96683	-0.249988	0.802597	NA	1.06724	0	0	0	1	0	0	0	AC154438.1	lincRNA	chr16	2540
ENSMUSG00000117300.1	2.27715	0.341277	2.68992	0.126873	0.899041	NA	2.13447	1.80001	3.33416	1.83998	2	2	3	2	AC154457.3	processed_pseudogene	chr17	570
ENSMUSG00000116725.1	0.266809	-1.24165	4.96683	-0.249988	0.802597	NA	1.06724	0	0	0	1	0	0	0	AC154478.1	processed_transcript	chr16	1789
ENSMUSG00000117333.1	36.5429	0.105144	0.729157	0.144199	0.885343	0.999934	35.2188	35.1002	34.453	41.3995	33	39	31	45	AC154486.3	processed_pseudogene	chr17	1533
ENSMUSG00000116647.1	0.225001	-1.24388	4.96736	-0.250411	0.802269	NA	0	0.900005	0	0	0	1	0	0	AC154507.1	processed_pseudogene	chr17	451
ENSMUSG00000116655.1	0.277846	1.334	4.96736	0.268553	0.788274	NA	0	0	1.11139	0	0	0	1	0	AC154507.2	lincRNA	chr17	2165
ENSMUSG00000116859.1	0.225001	-1.24388	4.96736	-0.250411	0.802269	NA	0	0.900005	0	0	0	1	0	0	AC154518.1	processed_pseudogene	chr16	235
ENSMUSG00000117179.1	1.23465	2.24569	3.93171	0.571174	0.567882	NA	1.06724	0	1.11139	2.75996	1	0	1	3	AC154538.2	antisense	chr16	915
ENSMUSG00000116637.1	3.69395	0.952228	2.18305	0.436192	0.662698	NA	3.20171	1.80001	3.33416	6.43992	3	2	3	7	AC154540.2	processed_pseudogene	chr16	570
ENSMUSG00000117295.1	2.81077	-0.169425	2.45281	-0.0690736	0.944931	NA	4.26895	1.80001	3.33416	1.83998	4	2	3	2	AC154544.1	processed_pseudogene	chr17	510
ENSMUSG00000116624.1	31.0478	0.118758	0.787682	0.150769	0.880158	0.999934	28.8154	30.6002	28.896	35.8795	27	34	26	39	AC154654.1	TEC	chr16	2355
ENSMUSG00000116645.1	0.225001	-1.24388	4.96736	-0.250411	0.802269	NA	0	0.900005	0	0	0	1	0	0	AC154667.1	antisense	chr16	670
ENSMUSG00000116694.1	6.76241	-1.07527	1.68397	-0.638532	0.523127	NA	14.9413	3.60002	6.66831	1.83998	14	4	6	2	AC154667.2	processed_pseudogene	chr16	354
ENSMUSG00000117283.1	0.507843	2.4877	4.89227	0.508496	0.611106	NA	0	0	1.11139	0.919988	0	0	1	1	AC154679.4	processed_pseudogene	chr17	907
ENSMUSG00000117234.1	2.05715	2.34889	3.14352	0.747215	0.454934	NA	2.13447	0	3.33416	2.75996	2	0	3	3	AC154707.1	processed_pseudogene	chr17	1756
ENSMUSG00000117252.1	2.21827	-0.422405	2.74676	-0.153783	0.877781	NA	3.20171	1.80001	1.11139	2.75996	3	2	1	3	AC154707.2	processed_pseudogene	chr17	1345
ENSMUSG00000115220.1	1.78534	1.3407	3.05549	0.438786	0.660817	NA	1.06724	0.900005	3.33416	1.83998	1	1	3	2	AC154760.1	lincRNA	chr14	673
ENSMUSG00000116677.1	4.75724	-0.408927	1.91424	-0.213623	0.830841	NA	6.40342	4.50003	4.44554	3.67995	6	5	4	4	AC154762.1	TEC	chr16	281
ENSMUSG00000116723.1	0.962842	1.75654	4.32196	0.406422	0.684433	NA	0	0.900005	1.11139	1.83998	0	1	1	2	AC154762.2	antisense	chr16	305
ENSMUSG00000116795.1	41.6223	-0.138311	0.687505	-0.201178	0.84056	0.999934	43.7567	43.2002	34.453	45.0794	41	48	31	49	AC154763.2	TEC	chr16	1290
ENSMUSG00000117322.1	8.44119	-0.134917	1.46247	-0.0922527	0.926497	NA	9.60514	8.10005	7.7797	8.27989	9	9	7	9	AC154766.4	antisense	chr17	1624
ENSMUSG00000117256.1	0.811465	-0.480044	4.85336	-0.0989094	0.92121	NA	2.13447	0	1.11139	0	2	0	1	0	AC154779.4	processed_pseudogene	chr17	346
ENSMUSG00000116861.1	3.94682	-0.645628	2.12131	-0.304354	0.760859	NA	3.20171	6.30004	4.44554	1.83998	3	7	4	2	AC154807.1	processed_pseudogene	chr16	433
ENSMUSG00000116952.1	0.277846	1.334	4.96736	0.268553	0.788274	NA	0	0	1.11139	0	0	0	1	0	AC154836.1	processed_pseudogene	chr16	1188
ENSMUSG00000117294.1	108.478	-0.644895	0.440872	-1.46277	0.14353	0.999934	113.127	152.101	76.6856	91.9988	106	169	69	100	AC154912.3	TEC	chr17	3612
ENSMUSG00000117304.1	0.454998	0.0444687	4.88765	0.00909818	0.992741	NA	0	0.900005	0	0.919988	0	1	0	1	AC154912.4	processed_pseudogene	chr17	243
ENSMUSG00000117313.1	62.105	-0.157599	0.567214	-0.277847	0.78113	0.999934	59.7653	71.1004	52.2351	65.3191	56	79	47	71	AC154912.5	sense_intronic	chr17	1708
ENSMUSG00000116916.1	0.684995	0.570179	4.85336	0.117481	0.906479	NA	0	0.900005	0	1.83998	0	1	0	2	AC155268.1	processed_pseudogene	chr16	236
ENSMUSG00000116630.1	0.544656	0.0456629	4.88765	0.00934252	0.992546	NA	1.06724	0	1.11139	0	1	0	1	0	AC156023.1	processed_pseudogene	chr16	792
ENSMUSG00000116920.1	0.277846	1.334	4.96736	0.268553	0.788274	NA	0	0	1.11139	0	0	0	1	0	AC156023.3	lincRNA	chr16	808
ENSMUSG00000112110.1	10.764	-0.0928521	1.30559	-0.071119	0.943303	NA	9.60514	12.6001	8.89109	11.9598	9	14	8	13	AC158605.1	lincRNA	chr10	1057
ENSMUSG00000116659.1	0.277846	1.334	4.96736	0.268553	0.788274	NA	0	0	1.11139	0	0	0	1	0	AC158985.1	unprocessed_pseudogene	chr16	885
ENSMUSG00000117257.1	0.769657	-1.21863	4.77276	-0.255331	0.798468	NA	1.06724	0.900005	1.11139	0	1	1	1	0	AC159187.1	processed_pseudogene	chr17	920
ENSMUSG00000116579.1	2.02009	-2.95047	3.19093	-0.924643	0.355151	NA	4.26895	2.70002	1.11139	0	4	3	1	0	AC159200.1	lincRNA	chr16	715
ENSMUSG00000115801.1	0.993613	0.0404242	4.68164	0.00863461	0.993111	NA	2.13447	0	0	1.83998	2	0	0	2	AC160336.1	lincRNA	chr14	93147
ENSMUSG00000111394.1	553.642	-0.0675548	0.234758	-0.287763	0.773528	0.999934	644.611	476.103	689.059	404.795	604	529	620	440	AC160637.1	TEC	chr9	3887
ENSMUSG00000116762.1	7.27826	0.195271	1.57544	0.123947	0.901357	NA	5.33619	8.10005	5.55693	10.1199	5	9	5	11	AC161376.1	lincRNA	chr16	995
ENSMUSG00000116903.1	0.721808	-1.21757	4.86122	-0.250466	0.802227	NA	1.06724	0.900005	0	0.919988	1	1	0	1	AC161607.1	antisense	chr16	2525
ENSMUSG00000117215.1	0.266809	-1.24165	4.96683	-0.249988	0.802597	NA	1.06724	0	0	0	1	0	0	0	AC162805.6	processed_pseudogene	chr17	370
ENSMUSG00000111334.1	3.67896	-0.120104	2.15521	-0.0557273	0.955559	NA	3.20171	4.50003	3.33416	3.67995	3	5	3	4	AC162938.1	processed_transcript	chr9	4724
ENSMUSG00000113831.1	26.2628	-0.819713	0.864895	-0.94776	0.343251	0.999934	38.4205	28.8002	16.6708	21.1597	36	32	15	23	AC163032.1	lincRNA	chr12	2970
ENSMUSG00000116887.1	0.780694	0.595588	4.88183	0.122001	0.902898	NA	0	0.900005	2.22277	0	0	1	2	0	AC163355.1	processed_pseudogene	chr16	371
ENSMUSG00000116537.1	0.229997	1.33177	4.96683	0.268132	0.788597	NA	0	0	0	0.919988	0	0	0	1	AC163633.1	lincRNA	chr12	739
ENSMUSG00000116606.1	17.8463	0.109911	1.03152	0.106552	0.915144	NA	22.412	12.6001	18.8936	17.4798	21	14	17	19	AC163633.2	lincRNA	chr12	654
ENSMUSG00000116635.1	1.54431	0.0457493	3.23717	0.0141325	0.988724	NA	2.13447	0.900005	2.22277	0.919988	2	1	2	1	AC163634.1	transcribed_unprocessed_pseudogene	chr12	874
ENSMUSG00000116798.1	0.496806	0.0450723	4.9968	0.00902022	0.992803	NA	1.06724	0	0	0.919988	1	0	0	1	AC163662.1	processed_pseudogene	chr16	525
ENSMUSG00000116811.1	15.1026	0.00966768	1.12597	0.00858606	0.993149	NA	13.8741	15.3001	21.1163	10.1199	13	17	19	11	AC163694.1	processed_pseudogene	chr16	1102
ENSMUSG00000116951.1	0.266809	-1.24165	4.96683	-0.249988	0.802597	NA	1.06724	0	0	0	1	0	0	0	AC163720.3	lincRNA	chr16	1123
ENSMUSG00000116686.1	5.60464	0.497676	1.78368	0.279016	0.780232	NA	3.20171	6.30004	5.55693	7.3599	3	7	5	8	AC164088.1	processed_pseudogene	chr16	363
ENSMUSG00000116929.1	107.459	0.162963	0.440393	0.370041	0.711352	0.999934	93.9169	108.901	105.582	121.438	88	121	95	132	AC164088.2	TEC	chr16	465
ENSMUSG00000116878.1	0.229997	1.33177	4.96683	0.268132	0.788597	NA	0	0	0	0.919988	0	0	0	1	AC164165.2	processed_transcript	chr16	1477
ENSMUSG00000116603.1	0.277846	1.334	4.96736	0.268553	0.788274	NA	0	0	1.11139	0	0	0	1	0	AC164296.1	processed_pseudogene	chr16	845
ENSMUSG00000116760.1	1.13	-1.01507	4.39387	-0.23102	0.817299	NA	0	3.60002	0	0.919988	0	4	0	1	AC164314.1	processed_transcript	chr17	3991
ENSMUSG00000116988.1	0.266809	-1.24165	4.96683	-0.249988	0.802597	NA	1.06724	0	0	0	1	0	0	0	AC164314.2	protein_coding	chr17	2610
ENSMUSG00000116883.1	37.501	0.0058732	0.724848	0.00810267	0.993535	0.999934	34.1516	40.5002	42.2327	33.1196	32	45	38	36	AC164424.1	lincRNA	chr12	1546
ENSMUSG00000116704.1	1.73854	1.4922	3.39935	0.438967	0.660685	NA	0	2.70002	3.33416	0.919988	0	3	3	1	AC164431.1	processed_pseudogene	chr17	608
ENSMUSG00000117044.1	0.266809	-1.24165	4.96683	-0.249988	0.802597	NA	1.06724	0	0	0	1	0	0	0	AC164546.1	lincRNA	chr17	4393
ENSMUSG00000115508.1	0.544656	0.0456629	4.88765	0.00934252	0.992546	NA	1.06724	0	1.11139	0	1	0	1	0	AC164883.2	lincRNA	chr15	851
ENSMUSG00000116835.1	6.35722	-0.052538	1.67911	-0.0312892	0.975039	NA	6.40342	6.30004	4.44554	8.27989	6	7	4	9	AC165079.1	processed_pseudogene	chr16	615
ENSMUSG00000116919.1	1.19284	2.04081	3.95034	0.516616	0.605424	NA	0	0.900005	1.11139	2.75996	0	1	1	3	AC165151.1	processed_pseudogene	chr16	1420
ENSMUSG00000117019.1	3.70973	-0.602521	2.1616	-0.278738	0.780446	NA	5.33619	3.60002	2.22277	3.67995	5	4	2	4	AC165291.1	lincRNA	chr17	635
ENSMUSG00000116979.1	0.277846	1.334	4.96736	0.268553	0.788274	NA	0	0	1.11139	0	0	0	1	0	AC165344.1	lincRNA	chr16	509
ENSMUSG00000116838.1	16.5811	0.393559	1.06907	0.368132	0.712775	NA	11.7396	17.1001	20.0049	17.4798	11	19	18	19	AC165953.1	processed_pseudogene	chr17	1936
ENSMUSG00000116858.1	54.8147	0.472791	0.611666	0.772957	0.439548	0.999934	49.0929	42.3002	53.3465	74.519	46	47	48	81	AC165953.2	lincRNA	chr17	4534
ENSMUSG00000117111.1	1.44466	-2.41985	3.70795	-0.652611	0.514007	NA	1.06724	3.60002	1.11139	0	1	4	1	0	AC165960.1	processed_pseudogene	chr17	479
ENSMUSG00000116947.1	0.780694	0.595588	4.88183	0.122001	0.902898	NA	0	0.900005	2.22277	0	0	1	2	0	AC165961.3	lincRNA	chr16	452
ENSMUSG00000117114.1	1.93647	-2.94072	3.2877	-0.894459	0.371076	NA	2.13447	4.50003	1.11139	0	2	5	1	0	AC166058.1	processed_pseudogene	chr17	252
ENSMUSG00000117239.1	0.266809	-1.24165	4.96683	-0.249988	0.802597	NA	1.06724	0	0	0	1	0	0	0	AC166110.3	transcribed_processed_pseudogene	chr17	4640
ENSMUSG00000117278.1	0.266809	-1.24165	4.96683	-0.249988	0.802597	NA	1.06724	0	0	0	1	0	0	0	AC166110.4	lincRNA	chr17	3095
ENSMUSG00000116640.1	2.48008	-1.22788	2.6277	-0.467285	0.640296	NA	4.26895	2.70002	1.11139	1.83998	4	3	1	2	AC166114.1	processed_pseudogene	chr16	1049
ENSMUSG00000117104.1	2.2869	-3.09956	3.039	-1.01993	0.307762	NA	5.33619	2.70002	1.11139	0	5	3	1	0	AC166164.1	antisense	chr17	471
ENSMUSG00000116593.1	0.454998	0.0444687	4.88765	0.00909818	0.992741	NA	0	0.900005	0	0.919988	0	1	0	1	AC166572.1	processed_pseudogene	chr16	192
ENSMUSG00000116598.1	0.277846	1.334	4.96736	0.268553	0.788274	NA	0	0	1.11139	0	0	0	1	0	AC166832.1	processed_pseudogene	chr16	460
ENSMUSG00000116823.1	0.229997	1.33177	4.96683	0.268132	0.788597	NA	0	0	0	0.919988	0	0	0	1	AC166832.3	antisense	chr16	515
ENSMUSG00000117324.1	1.28854	2.24836	3.86935	0.58107	0.561193	NA	0	0.900005	3.33416	0.919988	0	1	3	1	AC167169.1	antisense	chr16	1547
ENSMUSG00000116868.1	0.225001	-1.24388	4.96736	-0.250411	0.802269	NA	0	0.900005	0	0	0	1	0	0	AC167249.1	unprocessed_pseudogene	chr17	985
ENSMUSG00000117007.1	2.4125	0.291117	2.65089	0.109819	0.912553	NA	1.06724	3.60002	2.22277	2.75996	1	4	2	3	AC167363.1	lincRNA	chr17	2434
ENSMUSG00000117050.1	1.03647	-1.66405	4.19699	-0.396486	0.691747	NA	2.13447	0.900005	1.11139	0	2	1	1	0	AC167363.2	TEC	chr17	1046
ENSMUSG00000116644.1	13.6188	-0.0522766	1.16734	-0.0447828	0.96428	NA	17.0758	10.8001	15.5594	11.0399	16	12	14	12	AC168090.1	lincRNA	chr17	1299
ENSMUSG00000116893.1	0.277846	1.334	4.96736	0.268553	0.788274	NA	0	0	1.11139	0	0	0	1	0	AC168090.2	processed_pseudogene	chr17	451
ENSMUSG00000116681.1	0.266809	-1.24165	4.96683	-0.249988	0.802597	NA	1.06724	0	0	0	1	0	0	0	AC168220.1	sense_intronic	chr16	595
ENSMUSG00000116890.1	3.18611	0.562057	2.33385	0.240828	0.809688	NA	3.20171	1.80001	2.22277	5.51993	3	2	2	6	AC168220.2	sense_intronic	chr16	366
ENSMUSG00000116927.1	0.454998	0.0444687	4.88765	0.00909818	0.992741	NA	0	0.900005	0	0.919988	0	1	0	1	AC168220.3	antisense	chr16	564
ENSMUSG00000117086.1	0.229997	1.33177	4.96683	0.268132	0.788597	NA	0	0	0	0.919988	0	0	0	1	AC169506.1	processed_pseudogene	chr17	156
ENSMUSG00000117202.1	1.45965	0.861978	3.33419	0.258527	0.796	NA	1.06724	0.900005	1.11139	2.75996	1	1	1	3	AC169506.3	processed_pseudogene	chr17	356
ENSMUSG00000115852.2	3.465	0.532029	2.22491	0.239124	0.811009	NA	2.13447	3.60002	4.44554	3.67995	2	4	4	4	AC169509.1	transcribed_processed_pseudogene	chr16	4881
ENSMUSG00000117145.1	17.6995	-0.227843	1.04724	-0.217566	0.827767	NA	17.0758	19.8001	10.0025	23.9197	16	22	9	26	AC170998.1	protein_coding	chr17	618
ENSMUSG00000117254.1	3.51784	0.908313	2.21671	0.409758	0.681983	NA	2.13447	2.70002	5.55693	3.67995	2	3	5	4	AC171111.1	lincRNA	chr17	2965
ENSMUSG00000116766.1	5.01405	-1.24503	1.90114	-0.654887	0.512541	NA	7.47066	6.30004	4.44554	1.83998	7	7	4	2	AC171205.1	TEC	chr16	1797
ENSMUSG00000117042.1	31.3755	0.0346799	0.786578	0.0440896	0.964833	0.999934	38.4205	24.3001	33.3416	29.4396	36	27	30	32	AC173344.1	lincRNA	chr17	5232
ENSMUSG00000116964.1	0.229997	1.33177	4.96683	0.268132	0.788597	NA	0	0	0	0.919988	0	0	0	1	AC174448.1	antisense	chr16	664
ENSMUSG00000115222.1	79.7138	0.255488	0.504912	0.506004	0.612854	0.999934	71.5049	73.8004	88.9109	84.6389	67	82	80	92	AC174678.1	antisense	chr14	2749
ENSMUSG00000116812.1	0.763616	-0.504653	4.88437	-0.10332	0.917709	NA	2.13447	0	0	0.919988	2	0	0	1	AC183097.2	unprocessed_pseudogene	chr17	3159
ENSMUSG00000116815.1	46.0044	-0.432164	0.654165	-0.660635	0.508847	0.999934	57.6308	47.7003	45.5668	33.1196	54	53	41	36	AC238676.1	processed_pseudogene	chr12	1785
ENSMUSG00000116715.1	0.544656	0.0456629	4.88765	0.00934252	0.992546	NA	1.06724	0	1.11139	0	1	0	1	0	AC242683.1	unprocessed_pseudogene	chr12	883
ENSMUSG00000036138.16	1778.2	0.0354493	0.169605	0.209011	0.834439	0.999934	1781.22	1729.81	1880.46	1721.3	1669	1922	1692	1871	Acaa1a	protein_coding	chr9	4414
ENSMUSG00000010651.4	70.5439	-1.48297	0.663062	-2.23655	0.025316	0.629247	55.4963	126.901	7.7797	91.9988	52	141	7	100	Acaa1b	protein_coding	chr9	1962
ENSMUSG00000036880.9	2007.46	-0.00969491	0.167899	-0.0577426	0.953954	0.999934	2005.34	2019.61	1876.02	2128.85	1879	2244	1688	2314	Acaa2	protein_coding	chr18	1515
ENSMUSG00000020532.18	1933.92	-0.252961	0.175479	-1.44154	0.149431	0.999934	2056.57	2133.91	1535.94	2009.25	1927	2371	1382	2184	Acaca	protein_coding	chr11	17074
ENSMUSG00000042010.16	529.212	-0.33957	0.264404	-1.28429	0.199041	0.999934	489.862	655.204	290.072	681.711	459	728	261	741	Acacb	protein_coding	chr5	9632
ENSMUSG00000029456.12	262.959	-0.0772447	0.300452	-0.257095	0.797105	0.999934	276.414	263.701	252.285	259.437	259	293	227	282	Acad10	protein_coding	chr5	6068
ENSMUSG00000090150.10	2636.81	0.291346	0.160649	1.81356	0.069745	0.999934	2437.57	2305.81	2824.03	2979.84	2284	2562	2541	3239	Acad11	protein_coding	chr9	9798
ENSMUSG00000042647.13	193.425	0.600733	0.343554	1.74859	0.0803624	0.999934	171.825	136.801	237.837	227.237	161	152	214	247	Acad12	protein_coding	chr5	6516
ENSMUSG00000031969.16	743.749	-0.261662	0.212854	-1.2293	0.218959	0.999934	859.126	764.104	653.495	698.271	805	849	588	759	Acad8	protein_coding	chr9	4143
ENSMUSG00000027710.14	761.049	-0.183399	0.212265	-0.864009	0.387583	0.999934	826.042	791.104	657.94	769.11	774	879	592	836	Acad9	protein_coding	chr3	8192
ENSMUSG00000026003.5	1885.39	0.279959	0.167252	1.67388	0.094154	0.999934	1696.91	1709.11	2073.85	2061.69	1590	1899	1866	2241	Acadl	protein_coding	chr1	2005
ENSMUSG00000062908.12	2470.33	0.0459383	0.166378	0.276108	0.782465	0.999934	2593.39	2273.41	2433.93	2580.57	2430	2526	2190	2805	Acadm	protein_coding	chr3	3913
ENSMUSG00000029545.13	3893.67	-0.00810815	0.163624	-0.0495537	0.960478	0.999934	4139.81	3667.52	3605.34	4162.03	3879	4075	3244	4524	Acads	protein_coding	chr5	2269
ENSMUSG00000030861.15	584.587	-0.0231103	0.22509	-0.102671	0.918224	0.999934	585.913	592.203	599.037	561.193	549	658	539	610	Acadsb	protein_coding	chr7	7179
ENSMUSG00000018574.14	3385.91	-0.0966413	0.155992	-0.619526	0.53557	0.999934	3483.46	3509.12	3070.76	3480.31	3264	3899	2763	3783	Acadvl	protein_coding	chr11	2686
ENSMUSG00000001588.12	21.4771	-1.88036	0.993417	-1.89282	0.0583822	NA	34.1516	32.4002	5.55693	13.7998	32	36	5	15	Acap1	protein_coding	chr11	4878
ENSMUSG00000049076.11	2796.62	0.352583	0.171083	2.06088	0.0393142	0.77907	2510.14	2363.41	3696.47	2616.45	2352	2626	3326	2844	Acap2	protein_coding	chr16	6732
ENSMUSG00000029033.16	239.883	0.39519	0.333225	1.18596	0.23564	0.999934	169.691	247.501	291.183	251.157	159	275	262	273	Acap3	protein_coding	chr4	5367
ENSMUSG00000032047.5	2513.81	-0.25356	0.160188	-1.58289	0.113447	0.999934	2838.85	2625.31	2453.94	2137.13	2660	2917	2208	2323	Acat1	protein_coding	chr9	3758
ENSMUSG00000023832.14	636.784	-0.290245	0.234331	-1.23861	0.21549	0.999934	640.342	759.604	630.156	517.033	600	844	567	562	Acat2	protein_coding	chr17	2544
ENSMUSG00000062480.12	2.23535	0.511685	2.73906	0.18681	0.851809	NA	1.06724	2.70002	3.33416	1.83998	1	3	3	2	Acat3	protein_coding	chr17	2427
ENSMUSG00000026499.5	2167.04	-0.0297629	0.167003	-0.178218	0.858552	0.999934	2091.79	2287.81	2203.88	2084.69	1960	2542	1983	2266	Acbd3	protein_coding	chr1	6780
ENSMUSG00000056938.16	253.032	-0.285656	0.306696	-0.931398	0.351648	0.999934	286.02	270.002	217.832	238.277	268	300	196	259	Acbd4	protein_coding	chr11	2937
ENSMUSG00000026781.17	1412.09	0.0813236	0.178812	0.4548	0.649253	0.999934	1414.09	1331.11	1419.24	1483.94	1325	1479	1277	1613	Acbd5	protein_coding	chr2	9775
ENSMUSG00000033701.13	286.88	-0.0965235	0.292778	-0.329682	0.74164	0.999934	310.566	279.902	317.856	239.197	291	311	286	260	Acbd6	protein_coding	chr1	6453
ENSMUSG00000026644.7	0.800428	-2.14586	4.9193	-0.436213	0.662682	NA	3.20171	0	0	0	3	0	0	0	Acbd7	protein_coding	chr2	534
ENSMUSG00000040272.14	77.8546	-0.277272	0.51129	-0.542299	0.587612	0.999934	99.2531	72.0004	76.6856	63.4792	93	80	69	69	Accs	protein_coding	chr2	8364
ENSMUSG00000075023.11	0.533619	-1.8095	4.93228	-0.366869	0.713717	NA	2.13447	0	0	0	2	0	0	0	Accsl	protein_coding	chr2	2801
ENSMUSG00000038000.10	145.241	-0.165508	0.385103	-0.429777	0.667358	0.999934	156.884	150.301	136.7	137.078	147	167	123	149	Acd	protein_coding	chr8	3625
ENSMUSG00000020681.14	474.12	0.310127	0.256732	1.20798	0.227054	0.999934	433.298	401.402	652.383	409.395	406	446	587	445	Ace	protein_coding	chr11	5287
ENSMUSG00000015405.15	115.764	0.726005	0.433784	1.67366	0.0941984	0.999934	91.7824	80.1005	178.933	112.239	86	89	161	122	Ace2	protein_coding	chrX	3762
ENSMUSG00000101605.1	3.77749	0.358866	2.20592	0.162683	0.870768	NA	1.06724	6.30004	2.22277	5.51993	1	7	2	6	Ace3	protein_coding	chr11	2214
ENSMUSG00000045019.4	793.799	0.242098	0.204902	1.18153	0.237391	0.999934	717.183	737.104	825.76	895.148	672	819	743	973	Acer1	protein_coding	chr17	2429
ENSMUSG00000038007.14	94.6557	-0.0655321	0.466417	-0.140501	0.888264	0.999934	92.8496	100.801	91.1336	93.8388	87	112	82	102	Acer2	protein_coding	chr4	7159
ENSMUSG00000030760.14	498.912	-0.186028	0.236706	-0.785907	0.431922	0.999934	522.946	539.103	469.005	464.594	490	599	422	505	Acer3	protein_coding	chr7	15324
ENSMUSG00000023328.14	110.811	0.0959528	0.438533	0.218804	0.826803	0.999934	101.388	112.501	124.475	104.879	95	125	112	114	Ache	protein_coding	chr5	4623
ENSMUSG00000022185.19	2014.95	0.0924709	0.165481	0.5588	0.576298	0.999934	2037.36	1864.81	2132.75	2024.89	1909	2072	1919	2201	Acin1	protein_coding	chr14	10527
ENSMUSG00000044534.8	3.51076	2.28137	2.52215	0.904536	0.365711	NA	4.26895	0	3.33416	6.43992	4	0	3	7	Ackr2	protein_coding	chr9	3127
ENSMUSG00000044337.5	30.8149	-2.26547	0.825943	-2.74289	0.00609009	0.289112	48.0257	54.0003	11.1139	10.1199	45	60	10	11	Ackr3	protein_coding	chr1	3348
ENSMUSG00000079355.5	22.5169	-1.15459	0.958184	-1.20498	0.228212	NA	23.4792	36.0002	6.66831	23.9197	22	40	6	26	Ackr4	protein_coding	chr9	5380
ENSMUSG00000020917.17	9440.36	0.243271	0.164272	1.4809	0.138633	0.999934	8739.61	8366.45	12381.9	8273.45	8189	9296	11141	8993	Acly	protein_coding	chr11	5279
ENSMUSG00000026348.7	0.266809	-1.24165	4.96683	-0.249988	0.802597	NA	1.06724	0	0	0	1	0	0	0	Acmsd	protein_coding	chr1	2831
ENSMUSG00000070985.3	443.998	0.286848	0.260734	1.10015	0.271265	0.999934	339.381	444.603	343.418	648.591	318	494	309	705	Acnat1	protein_coding	chr4	2128
ENSMUSG00000060317.9	0.459994	1.89962	4.93227	0.385141	0.700133	NA	0	0	0	1.83998	0	0	0	2	Acnat2	protein_coding	chr4	1744
ENSMUSG00000028405.9	2168.82	0.116191	0.163455	0.710843	0.477181	0.999934	2068.31	2094.31	2201.66	2311.01	1938	2327	1981	2512	Aco1	protein_coding	chr4	4496
ENSMUSG00000022477.13	10882.3	0.0413678	0.140403	0.294636	0.768272	0.999934	10579.5	10868.5	10681.5	11399.6	9913	12076	9611	12391	Aco2	protein_coding	chr15	4302
ENSMUSG00000022126.6	0.277846	1.334	4.96736	0.268553	0.788274	NA	0	0	1.11139	0	0	0	1	0	Acod1	protein_coding	chr14	2623
ENSMUSG00000072949.6	73.0951	-0.462494	0.530947	-0.871074	0.383714	0.999934	82.1773	86.4005	51.1237	72.679	77	96	46	79	Acot1	protein_coding	chr12	3919
ENSMUSG00000047565.5	3.50181	0.0450985	2.2056	0.0204473	0.983687	NA	3.20171	3.60002	4.44554	2.75996	3	4	4	3	Acot10	protein_coding	chr15	1537
ENSMUSG00000034853.16	1446.06	0.144868	0.182128	0.795419	0.42637	0.999934	1296.69	1450.81	1580.39	1456.34	1215	1612	1422	1583	Acot11	protein_coding	chr4	6056
ENSMUSG00000021620.4	0.727849	-0.50547	4.88184	-0.103541	0.917534	NA	0	1.80001	1.11139	0	0	2	1	0	Acot12	protein_coding	chr13	3293
ENSMUSG00000006717.7	392.097	0.319841	0.257782	1.24074	0.214701	0.999934	391.676	306.902	477.896	391.915	367	341	430	426	Acot13	protein_coding	chr13	744
ENSMUSG00000021226.7	124.216	-0.179835	0.412896	-0.435547	0.663166	0.999934	133.405	130.501	113.361	119.598	125	145	102	130	Acot2	protein_coding	chr12	2196
ENSMUSG00000021228.15	0.727849	-0.50547	4.88184	-0.103541	0.917534	NA	0	1.80001	1.11139	0	0	2	1	0	Acot3	protein_coding	chr12	3438
ENSMUSG00000052392.5	238.229	-0.0719155	0.312407	-0.230198	0.817938	0.999934	220.918	267.302	208.941	255.757	207	297	188	278	Acot4	protein_coding	chr12	6674
ENSMUSG00000042540.12	2.16542	-1.98522	3.0784	-0.644887	0.519	NA	3.20171	2.70002	0	2.75996	3	3	0	3	Acot5	protein_coding	chr12	1519
ENSMUSG00000043487.4	62.5166	-0.221261	0.575342	-0.384574	0.700553	0.999934	74.7066	56.7003	80.0198	38.6395	70	63	72	42	Acot6	protein_coding	chr12	6413
ENSMUSG00000028937.14	1220.48	0.209875	0.190091	1.10408	0.269559	0.999934	1097.12	1162.81	1415.91	1206.1	1028	1292	1274	1311	Acot7	protein_coding	chr4	2124
ENSMUSG00000017307.16	638.584	-0.2134	0.219038	-0.974261	0.329927	0.999934	679.83	691.204	610.151	573.152	637	768	549	623	Acot8	protein_coding	chr2	1997
ENSMUSG00000025287.15	430.616	-0.355023	0.26043	-1.36322	0.172815	0.999934	468.517	494.103	432.329	327.516	439	549	389	356	Acot9	protein_coding	chrX	2273
ENSMUSG00000020777.16	5246.92	0.242177	0.148366	1.63229	0.102618	0.999934	4562.44	5036.43	5156.83	6232	4275	5596	4640	6774	Acox1	protein_coding	chr11	5082
ENSMUSG00000021751.13	18.9628	-0.808135	1.00334	-0.805441	0.420566	NA	20.2775	27.9002	11.1139	16.5598	19	31	10	18	Acox2	protein_coding	chr14	3703
ENSMUSG00000029098.17	823.505	-0.265151	0.202654	-1.30839	0.190741	0.999934	906.084	891.905	737.96	758.07	849	991	664	824	Acox3	protein_coding	chr5	11521
ENSMUSG00000027380.10	0.496806	0.0450723	4.9968	0.00902022	0.992803	NA	1.06724	0	0	0.919988	1	0	0	1	Acoxl	protein_coding	chr2	3179
ENSMUSG00000044573.16	1029.22	0.103155	0.195034	0.528906	0.596871	0.999934	1054.43	932.405	1038.03	1092.03	988	1036	934	1187	Acp1	protein_coding	chr12	3634
ENSMUSG00000002103.15	613.643	0.24561	0.221732	1.10769	0.267996	0.999934	563.501	558.903	694.616	637.552	528	621	625	693	Acp2	protein_coding	chr2	5186
ENSMUSG00000001348.15	2496.7	0.034726	0.160493	0.21637	0.828699	0.999934	2457.85	2474.11	2603.98	2450.85	2303	2749	2343	2664	Acp5	protein_coding	chr9	2030
ENSMUSG00000028093.15	622.919	0.116106	0.220081	0.52756	0.597805	0.999934	600.855	594.903	639.047	656.871	563	661	575	714	Acp6	protein_coding	chr3	8503
ENSMUSG00000037469.9	0.229997	1.33177	4.96683	0.268132	0.788597	NA	0	0	0	0.919988	0	0	0	1	Acp7	protein_coding	chr7	2232
ENSMUSG00000032561.15	727.131	0.470774	0.210067	2.24107	0.0250216	0.62845	663.822	556.203	904.668	783.83	622	618	814	852	Acpp	protein_coding	chr9	7330
ENSMUSG00000072770.9	60.3357	0.0621577	0.58892	0.105545	0.915943	0.999934	59.7653	56.7003	46.6782	78.199	56	63	42	85	Acrbp	protein_coding	chr6	3277
ENSMUSG00000032281.11	6.79311	-2.31125	1.7375	-1.33022	0.183447	NA	12.8068	9.00005	4.44554	0.919988	12	10	4	1	Acsbg1	protein_coding	chr9	3604
ENSMUSG00000076435.3	1466.29	-0.379998	0.210133	-1.80837	0.0705487	0.999934	1506.94	1740.61	893.554	1724.06	1412	1934	804	1874	Acsf2	protein_coding	chr11	3432
ENSMUSG00000015016.8	463.615	0.00760056	0.243453	0.0312199	0.975094	0.999934	437.567	486.003	421.215	509.673	410	540	379	554	Acsf3	protein_coding	chr8	3747
ENSMUSG00000018796.13	701.252	-0.225397	0.219019	-1.02912	0.303424	0.999934	726.789	783.004	699.062	596.152	681	870	629	648	Acsl1	protein_coding	chr8	10483
ENSMUSG00000032883.15	4180.81	0.258954	0.150746	1.71782	0.0858287	0.999934	4128.07	3494.72	4770.07	4330.38	3868	3883	4292	4707	Acsl3	protein_coding	chr1	4357
ENSMUSG00000031278.12	449.036	-0.311756	0.248303	-1.25555	0.20928	0.999934	447.172	543.603	333.416	471.954	419	604	300	513	Acsl4	protein_coding	chrX	5405
ENSMUSG00000024981.6	2614.93	0.030153	0.159375	0.189195	0.84994	0.999934	2562.44	2610.91	2532.85	2753.52	2401	2901	2279	2993	Acsl5	protein_coding	chr19	4864
ENSMUSG00000020333.17	4.27751	-0.224281	2.0524	-0.109277	0.912983	NA	3.20171	5.40003	6.66831	1.83998	3	6	6	2	Acsl6	protein_coding	chr11	9914
ENSMUSG00000030935.15	5002.19	0.0687269	0.155021	0.443341	0.657519	0.999934	4981.86	4747.53	5771.43	4507.94	4668	5275	5193	4900	Acsm3	protein_coding	chr7	4936
ENSMUSG00000027452.11	1933.58	-0.488969	0.180293	-2.71208	0.00668623	0.304048	2231.59	2264.41	1372.56	1865.74	2091	2516	1235	2028	Acss1	protein_coding	chr2	4128
ENSMUSG00000027605.18	2984.21	0.15352	0.157311	0.975905	0.329111	0.999934	2972.26	2668.52	3459.74	2836.32	2785	2965	3113	3083	Acss2	protein_coding	chr2	10163
ENSMUSG00000086529.1	1.5075	1.04507	3.27058	0.319537	0.74932	NA	1.06724	0.900005	2.22277	1.83998	1	1	2	2	Acss2os	antisense	chr2	629
ENSMUSG00000035948.13	7.79875	-0.226586	1.62718	-0.139251	0.889252	NA	10.6724	4.50003	2.22277	13.7998	10	5	2	15	Acss3	protein_coding	chr10	7196
ENSMUSG00000031972.5	245.218	0.268909	0.351506	0.765021	0.444259	0.999934	197.439	238.501	348.975	195.957	185	265	314	213	Acta1	protein_coding	chr8	1536
ENSMUSG00000035783.8	2.50216	0.0451427	2.57656	0.0175206	0.986021	NA	2.13447	2.70002	3.33416	1.83998	2	3	3	2	Acta2	protein_coding	chr19	1781
ENSMUSG00000029580.14	56867.9	0.152369	0.138442	1.1006	0.271071	0.999934	55146.3	52392	65185	54748.5	51672	58213	58652	59510	Actb	protein_coding	chr5	2679
ENSMUSG00000074978.4	18.0697	0.101813	1.05383	0.0966122	0.923034	NA	11.7396	23.4001	23.3391	13.7998	11	26	21	15	Actg-ps1	processed_pseudogene	chr8	1124
ENSMUSG00000062825.15	19484.5	0.281081	0.137441	2.0451	0.040845	0.801075	18634	16534.9	22927.9	19841.4	17460	18372	20630	21567	Actg1	protein_coding	chr11	2658
ENSMUSG00000059430.14	1.26147	-2.19938	3.85863	-0.569989	0.568685	NA	2.13447	1.80001	1.11139	0	2	2	1	0	Actg2	protein_coding	chr6	1557
ENSMUSG00000078129.2	1.5025	0.0455163	3.26566	0.0139378	0.98888	NA	1.06724	1.80001	2.22277	0.919988	1	2	2	1	Actl10	protein_coding	chr2	1501
ENSMUSG00000027671.14	749.713	0.0391104	0.214671	0.182188	0.855435	0.999934	762.007	715.504	697.95	823.389	714	795	628	895	Actl6a	protein_coding	chr3	3886
ENSMUSG00000029712.14	2.79974	-0.632559	2.47212	-0.255877	0.798046	NA	5.33619	1.80001	2.22277	1.83998	5	2	2	2	Actl6b	protein_coding	chr5	4267
ENSMUSG00000070980.4	0.229997	1.33177	4.96683	0.268132	0.788597	NA	0	0	0	0.919988	0	0	0	1	Actl7b	protein_coding	chr4	1439
ENSMUSG00000092519.2	1.22466	-0.465463	3.57858	-0.130069	0.896512	NA	1.06724	1.80001	1.11139	0.919988	1	2	1	1	Actl9	protein_coding	chr17	1373
ENSMUSG00000015143.15	2228.49	0.105051	0.162628	0.645959	0.518306	0.999934	2097.12	2196.91	2226.11	2393.81	1965	2441	2003	2602	Actn1	protein_coding	chr12	5533
ENSMUSG00000052374.16	2.26612	-0.250766	2.69483	-0.0930544	0.92586	NA	3.20171	1.80001	2.22277	1.83998	3	2	2	2	Actn2	protein_coding	chr13	3795
ENSMUSG00000006457.3	0.763616	-0.504653	4.88437	-0.10332	0.917709	NA	2.13447	0	0	0.919988	2	0	0	1	Actn3	protein_coding	chr19	2894
ENSMUSG00000054808.15	7166.16	0.185647	0.144502	1.28474	0.198882	0.999934	6330.85	7090.24	7475.18	7768.38	5932	7878	6726	8444	Actn4	protein_coding	chr7	6127
ENSMUSG00000021076.6	956.856	-0.129508	0.19454	-0.665714	0.505594	0.999934	1003.2	996.306	896.888	931.028	940	1107	807	1012	Actr10	protein_coding	chr12	9726
ENSMUSG00000025228.4	2684.42	-0.0738833	0.158165	-0.467128	0.640409	0.999934	2724.66	2781.02	2548.41	2683.6	2553	3090	2293	2917	Actr1a	protein_coding	chr19	2742
ENSMUSG00000037351.9	2986.34	-0.0386291	0.155728	-0.248055	0.804092	0.999934	3087.52	2965.52	2985.18	2907.16	2893	3295	2686	3160	Actr1b	protein_coding	chr1	4274
ENSMUSG00000020152.7	4603.67	0.0516127	0.14836	0.347889	0.727924	0.999934	4404.49	4638.63	4586.69	4784.86	4127	5154	4127	5201	Actr2	protein_coding	chr11	5204
ENSMUSG00000026341.16	7250.78	0.0577851	0.143723	0.40206	0.68764	0.999934	7233.73	6978.64	7340.7	7450.06	6778	7754	6605	8098	Actr3	protein_coding	chr1	4631
ENSMUSG00000056367.14	1.00465	1.89022	4.26056	0.443656	0.657291	NA	1.06724	0	1.11139	1.83998	1	0	1	2	Actr3b	protein_coding	chr5	2425
ENSMUSG00000037761.16	250.066	0.100697	0.30622	0.328838	0.742278	0.999934	242.263	240.301	265.621	252.077	227	267	239	274	Actr5	protein_coding	chr2	4186
ENSMUSG00000019948.4	85.048	0.154919	0.491853	0.31497	0.752784	0.999934	87.5135	73.8004	87.7995	91.0788	82	82	79	99	Actr6	protein_coding	chr10	1983
ENSMUSG00000015971.5	556.52	0.0421183	0.228001	0.184729	0.853442	0.999934	560.3	536.403	580.143	549.233	525	596	522	597	Actr8	protein_coding	chr14	9009
ENSMUSG00000026836.15	270.14	-0.307611	0.298617	-1.03012	0.302955	0.999934	291.356	306.002	252.285	230.917	273	340	227	251	Acvr1	protein_coding	chr2	4829
ENSMUSG00000000532.11	2168.28	0.0723056	0.16344	0.442398	0.658201	0.999934	2090.72	2136.61	2160.53	2285.25	1959	2374	1944	2484	Acvr1b	protein_coding	chr15	4418
ENSMUSG00000026834.13	394.962	-0.0973938	0.271198	-0.359125	0.719502	0.999934	410.886	400.502	316.745	451.714	385	445	285	491	Acvr1c	protein_coding	chr2	9292
ENSMUSG00000052155.5	918.123	-0.122941	0.200031	-0.614611	0.538812	0.999934	946.639	964.805	802.421	958.627	887	1072	722	1042	Acvr2a	protein_coding	chr2	5686
ENSMUSG00000061393.14	91.3967	0.120325	0.48213	0.249569	0.802921	0.999934	89.6479	84.6005	80.0198	111.319	84	94	72	121	Acvr2b	protein_coding	chr9	3928
ENSMUSG00000000530.16	48.7871	-0.611846	0.65487	-0.934301	0.350149	0.999934	65.1015	52.2003	30.0074	47.8394	61	58	27	52	Acvrl1	protein_coding	chr15	4265
ENSMUSG00000023262.13	656.64	0.469916	0.222961	2.10761	0.0350646	0.736527	543.224	554.403	843.542	685.391	509	616	759	745	Acy1	protein_coding	chr9	2966
ENSMUSG00000024866.9	142.064	-0.087662	0.390309	-0.224597	0.822293	0.999934	147.279	144.901	150.037	126.038	138	161	135	137	Acy3	protein_coding	chr19	1505
ENSMUSG00000008822.15	101.692	0.456328	0.451791	1.01004	0.312475	0.999934	89.6479	81.9005	121.141	114.079	84	91	109	124	Acyp1	protein_coding	chr12	1380
ENSMUSG00000060923.5	48.465	0.135886	0.64915	0.209328	0.834192	0.999934	57.6308	36.0002	47.7896	52.4393	54	40	43	57	Acyp2	protein_coding	chr11	863
ENSMUSG00000017697.3	101.244	-0.707744	0.453949	-1.55908	0.118977	0.999934	127.001	124.201	75.5742	78.199	119	138	68	85	Ada	protein_coding	chr2	2002
ENSMUSG00000024266.8	0.266809	-1.24165	4.96683	-0.249988	0.802597	NA	1.06724	0	0	0	1	0	0	0	Adad2	protein_coding	chr8	1926
ENSMUSG00000027259.15	172.136	-0.0188977	0.357914	-0.0527995	0.957892	0.999934	171.825	174.601	175.599	166.518	161	194	158	181	Adal	protein_coding	chr2	5317
ENSMUSG00000054693.14	2253.67	0.0260149	0.165353	0.157329	0.874985	0.999934	2276.42	2188.81	2169.43	2380.01	2133	2432	1952	2587	Adam10	protein_coding	chr9	4913
ENSMUSG00000020926.16	3.28785	0.704443	2.28725	0.307987	0.758092	NA	2.13447	2.70002	5.55693	2.75996	2	3	5	3	Adam11	protein_coding	chr11	5669
ENSMUSG00000054555.11	0.450003	-1.81261	4.93254	-0.367481	0.71326	NA	0	1.80001	0	0	0	2	0	0	Adam12	protein_coding	chr7	10573
ENSMUSG00000028041.17	1360.69	0.111391	0.191396	0.581992	0.560572	0.999934	1292.42	1310.41	1618.18	1221.74	1211	1456	1456	1328	Adam15	protein_coding	chr3	6145
ENSMUSG00000052593.16	932.328	-0.032587	0.196031	-0.166234	0.867973	0.999934	914.622	970.205	870.215	974.267	857	1078	783	1059	Adam17	protein_coding	chr12	7154
ENSMUSG00000031552.13	5.14644	0.0721623	1.95472	0.036917	0.970551	NA	2.13447	6.30004	1.11139	11.0399	2	7	1	12	Adam18	protein_coding	chr8	2361
ENSMUSG00000011256.16	12.8294	-1.75453	1.24425	-1.41011	0.158508	NA	22.412	17.1001	4.44554	7.3599	21	19	4	8	Adam19	protein_coding	chr11	7115
ENSMUSG00000072647.6	25.0688	-1.06543	0.885676	-1.20296	0.228993	NA	35.2188	32.4002	13.3366	19.3197	33	36	12	21	Adam1a	protein_coding	chr5	7508
ENSMUSG00000062438.4	0.266809	-1.24165	4.96683	-0.249988	0.802597	NA	1.06724	0	0	0	1	0	0	0	Adam1b	protein_coding	chr5	3338
ENSMUSG00000022039.6	0.266809	-1.24165	4.96683	-0.249988	0.802597	NA	1.06724	0	0	0	1	0	0	0	Adam2	protein_coding	chr14	2691
ENSMUSG00000008438.3	5.2837	-1.43227	1.90481	-0.751921	0.452099	NA	6.40342	8.10005	1.11139	5.51993	6	9	1	6	Adam21	protein_coding	chr12	2911
ENSMUSG00000040537.17	53.0713	-0.845024	0.613761	-1.3768	0.168575	0.999934	60.8325	75.6004	34.453	41.3995	57	84	31	45	Adam22	protein_coding	chr5	14348
ENSMUSG00000025964.15	1.52224	-2.40583	3.63522	-0.661811	0.508092	NA	4.26895	0.900005	0	0.919988	4	1	0	1	Adam23	protein_coding	chr1	17907
ENSMUSG00000046723.4	0.277846	1.334	4.96736	0.268553	0.788274	NA	0	0	1.11139	0	0	0	1	0	Adam24	protein_coding	chr8	2887
ENSMUSG00000014725.16	1.19284	2.04081	3.95034	0.516616	0.605424	NA	0	0.900005	1.11139	2.75996	0	1	1	3	Adam28	protein_coding	chr14	9184
ENSMUSG00000046258.4	0.266809	-1.24165	4.96683	-0.249988	0.802597	NA	1.06724	0	0	0	1	0	0	0	Adam29	protein_coding	chr8	2726
ENSMUSG00000037437.18	2.29923	2.55035	3.05071	0.835987	0.403162	NA	0	1.80001	5.55693	1.83998	0	2	5	2	Adam32	protein_coding	chr8	2993
ENSMUSG00000027318.17	0.229997	1.33177	4.96683	0.268132	0.788597	NA	0	0	0	0.919988	0	0	0	1	Adam33	protein_coding	chr2	5394
ENSMUSG00000079058.3	0.277846	1.334	4.96736	0.268553	0.788274	NA	0	0	1.11139	0	0	0	1	0	Adam34	protein_coding	chr8	2584
ENSMUSG00000072972.3	81.1281	0.136895	0.501768	0.272824	0.784988	0.999934	69.3704	85.5005	82.2425	87.3989	65	95	74	95	Adam4	protein_coding	chr12	2504
ENSMUSG00000022056.9	0.266809	-1.24165	4.96683	-0.249988	0.802597	NA	1.06724	0	0	0	1	0	0	0	Adam7	protein_coding	chr14	4330
ENSMUSG00000025473.16	14.7492	-0.890559	1.14133	-0.780284	0.435224	NA	16.0086	21.6001	6.66831	14.7198	15	24	6	16	Adam8	protein_coding	chr7	4638
ENSMUSG00000031555.15	1882.79	-0.100072	0.167514	-0.597395	0.550244	0.999934	1951.98	1944.01	1786	1849.18	1829	2160	1607	2010	Adam9	protein_coding	chr8	4115
ENSMUSG00000022057.8	2.42224	-3.31104	2.97543	-1.11279	0.265797	NA	4.26895	4.50003	0	0.919988	4	5	0	1	Adamdec1	protein_coding	chr14	2442
ENSMUSG00000022893.14	4.1011	0.592197	2.0952	0.282645	0.777449	NA	3.20171	2.70002	2.22277	8.27989	3	3	2	9	Adamts1	protein_coding	chr16	5302
ENSMUSG00000024299.16	45.6117	0.383904	0.657399	0.583975	0.559237	0.999934	38.4205	40.5002	45.5668	57.9592	36	45	41	63	Adamts10	protein_coding	chr17	5453
ENSMUSG00000047497.10	2.34862	-1.95651	2.94751	-0.663782	0.50683	NA	2.13447	4.50003	0	2.75996	2	5	0	3	Adamts12	protein_coding	chr15	10921
ENSMUSG00000014852.16	7.89266	0.0451657	1.52192	0.0296769	0.976325	NA	11.7396	4.50003	8.89109	6.43992	11	5	8	7	Adamts13	protein_coding	chr2	4925
ENSMUSG00000033453.8	1153.92	-0.384169	0.736365	-0.52171	0.601873	0.999934	1059.77	1486.81	1415.91	653.191	993	1652	1274	710	Adamts15	protein_coding	chr9	10363
ENSMUSG00000049538.14	12.7969	-0.286903	1.22016	-0.235136	0.814103	NA	11.7396	15.3001	6.66831	17.4798	11	17	6	19	Adamts16	protein_coding	chr13	6836
ENSMUSG00000058145.16	38.3673	-0.0581523	0.732861	-0.0793497	0.936754	0.999934	39.4878	36.9002	25.5619	51.5193	37	41	23	56	Adamts17	protein_coding	chr7	7764
ENSMUSG00000053399.9	18.2994	-1.2666	1.08089	-1.17181	0.241272	NA	22.412	26.1001	4.44554	20.2397	21	29	4	22	Adamts18	protein_coding	chr8	10178
ENSMUSG00000053441.4	0.507843	2.4877	4.89227	0.508496	0.611106	NA	0	0	1.11139	0.919988	0	0	1	1	Adamts19	protein_coding	chr18	4666
ENSMUSG00000036545.8	1.54431	0.0457493	3.23717	0.0141325	0.988724	NA	2.13447	0.900005	2.22277	0.919988	2	1	2	1	Adamts2	protein_coding	chr11	9336
ENSMUSG00000043635.12	26.1104	-0.597214	0.887227	-0.673124	0.500868	NA	23.4792	36.0002	10.0025	34.9595	22	40	9	38	Adamts3	protein_coding	chr5	5430
ENSMUSG00000006403.13	2.0093	2.38243	3.20449	0.743464	0.457201	NA	2.13447	0	2.22277	3.67995	2	0	2	4	Adamts4	protein_coding	chr1	4810
ENSMUSG00000022894.6	1.53931	-1.7143	3.53918	-0.484378	0.628118	NA	2.13447	1.80001	2.22277	0	2	2	2	0	Adamts5	protein_coding	chr16	10791
ENSMUSG00000046169.10	1.84189	0.178526	3.35735	0.0531748	0.957593	NA	5.33619	0	1.11139	0.919988	5	0	1	1	Adamts6	protein_coding	chr13	7798
ENSMUSG00000032363.15	4.5432	-0.0428307	2.06384	-0.020753	0.983443	NA	1.06724	9.90006	4.44554	2.75996	1	11	4	3	Adamts7	protein_coding	chr9	6282
ENSMUSG00000031994.13	0.544656	0.0456629	4.88765	0.00934252	0.992546	NA	1.06724	0	1.11139	0	1	0	1	0	Adamts8	protein_coding	chr9	4613
ENSMUSG00000030022.14	64.3118	0.478326	0.558952	0.855755	0.392133	0.999934	64.0342	43.2002	91.1336	58.8792	60	48	82	64	Adamts9	protein_coding	chr6	15048
ENSMUSG00000066113.16	0.726803	0.594751	4.88436	0.121766	0.903084	NA	1.06724	0	0	1.83998	1	0	0	2	Adamtsl1	protein_coding	chr4	12767
ENSMUSG00000036040.14	0.266809	-1.24165	4.96683	-0.249988	0.802597	NA	1.06724	0	0	0	1	0	0	0	Adamtsl2	protein_coding	chr2	7993
ENSMUSG00000070469.12	0.491811	-2.39757	4.89228	-0.490072	0.624083	NA	1.06724	0.900005	0	0	1	1	0	0	Adamtsl3	protein_coding	chr7	7744
ENSMUSG00000015850.11	64.3894	0.0544384	0.568307	0.0957904	0.923687	0.999934	56.5636	69.3004	75.5742	56.1193	53	77	68	61	Adamtsl4	protein_coding	chr3	4198
ENSMUSG00000043822.18	75.1745	-0.146182	0.530845	-0.275376	0.783028	0.999934	62.967	96.3005	73.3515	68.0791	59	107	66	74	Adamtsl5	protein_coding	chr10	4722
ENSMUSG00000056413.16	780.451	0.102866	0.213221	0.482438	0.629495	0.999934	696.906	809.105	845.765	770.03	653	899	761	837	Adap1	protein_coding	chr5	3292
ENSMUSG00000020709.15	40.9855	-0.26475	0.712086	-0.371795	0.710045	0.999934	36.2861	49.5003	21.1163	57.0393	34	55	19	62	Adap2	protein_coding	chr11	1785
ENSMUSG00000027951.16	1672.17	-0.129352	0.173438	-0.745815	0.455779	0.999934	1674.5	1813.51	1442.58	1758.1	1569	2015	1298	1911	Adar	protein_coding	chr3	8118
ENSMUSG00000020262.15	7.50388	1.0947	1.57735	0.694009	0.487677	NA	5.33619	3.60002	15.5594	5.51993	5	4	14	6	Adarb1	protein_coding	chr10	11272
ENSMUSG00000052551.16	0.266809	-1.24165	4.96683	-0.249988	0.802597	NA	1.06724	0	0	0	1	0	0	0	Adarb2	protein_coding	chr13	13114
ENSMUSG00000031949.17	77.4223	0.588769	0.518964	1.13451	0.256582	0.999934	59.7653	63.0004	107.804	79.119	56	70	97	86	Adat1	protein_coding	chr8	4399
ENSMUSG00000019808.8	55.2237	0.176179	0.602433	0.292446	0.769946	0.999934	56.5636	45.9003	73.3515	45.0794	53	51	66	49	Adat2	protein_coding	chr10	1466
ENSMUSG00000021044.15	247.605	0.157714	0.30781	0.512376	0.608388	0.999934	234.792	233.101	272.29	250.237	220	259	245	272	Adck1	protein_coding	chr12	5549
ENSMUSG00000046947.12	292.263	0.00987463	0.288516	0.0342256	0.972697	0.999934	287.087	295.202	303.408	283.356	269	328	273	308	Adck2	protein_coding	chr6	3950
ENSMUSG00000022550.18	1141.01	0.219846	0.19104	1.15079	0.24982	0.999934	1091.78	1016.11	1158.06	1298.1	1023	1129	1042	1411	Adck5	protein_coding	chr15	3633
ENSMUSG00000020431.5	13.1487	0.273419	1.19502	0.228798	0.819026	NA	10.6724	12.6001	10.0025	19.3197	10	14	9	21	Adcy1	protein_coding	chr11	12522
ENSMUSG00000026567.16	2.40646	-0.202664	2.65322	-0.0763842	0.939113	NA	2.13447	2.70002	1.11139	3.67995	2	3	1	4	Adcy10	protein_coding	chr1	8739
ENSMUSG00000021536.7	43.7538	-0.409051	0.669389	-0.611082	0.541146	0.999934	45.8912	54.0003	35.5643	39.5595	43	60	32	43	Adcy2	protein_coding	chr13	4211
ENSMUSG00000020654.15	5.81257	-0.117563	1.75884	-0.0668415	0.946708	NA	5.33619	6.30004	3.33416	8.27989	5	7	3	9	Adcy3	protein_coding	chr12	6246
ENSMUSG00000022220.14	4.26043	-0.482059	2.01739	-0.238952	0.811143	NA	5.33619	4.50003	4.44554	2.75996	5	5	4	3	Adcy4	protein_coding	chr14	4672
ENSMUSG00000022840.9	68.5255	-0.755176	0.546328	-1.38228	0.166886	0.999934	76.8411	94.5005	41.1213	61.6392	72	105	37	67	Adcy5	protein_coding	chr16	7184
ENSMUSG00000022994.9	6396.85	0.439616	0.154705	2.84164	0.00448824	0.244402	5406.62	5411.73	8224.25	6544.79	5066	6013	7400	7114	Adcy6	protein_coding	chr15	6782
ENSMUSG00000031659.13	25.3213	-1.30312	0.954026	-1.36592	0.171965	NA	48.0257	23.4001	7.7797	22.0797	45	26	7	24	Adcy7	protein_coding	chr8	6733
ENSMUSG00000022376.8	8.9348	4.07578	1.78598	2.28209	0.0224839	NA	0	2.70002	15.5594	17.4798	0	3	14	19	Adcy8	protein_coding	chr15	8152
ENSMUSG00000005580.11	419.679	-0.0659677	0.251281	-0.262525	0.792917	0.999934	401.281	457.203	382.317	437.914	376	508	344	476	Adcy9	protein_coding	chr16	5197
ENSMUSG00000029778.12	1.22466	-0.465463	3.57858	-0.130069	0.896512	NA	1.06724	1.80001	1.11139	0.919988	1	2	1	1	Adcyap1r1	protein_coding	chr6	6601
ENSMUSG00000029106.14	4596.11	-0.0206398	0.14841	-0.139073	0.889393	0.999934	4828.18	4428.03	4797.85	4330.38	4524	4920	4317	4707	Add1	protein_coding	chr5	8561
ENSMUSG00000030000.10	7.27567	1.43587	1.59284	0.901448	0.36735	NA	4.26895	3.60002	11.1139	10.1199	4	4	10	11	Add2	protein_coding	chr6	10139
ENSMUSG00000025026.14	2404.52	0.261484	0.160769	1.62646	0.103852	0.999934	2260.41	2112.31	2754.01	2491.33	2118	2347	2478	2708	Add3	protein_coding	chr19	4938
ENSMUSG00000050994.20	11.5857	0.818883	1.26898	0.645309	0.518727	NA	8.5379	8.10005	12.2252	17.4798	8	9	11	19	Adgb	protein_coding	chr10	6192
ENSMUSG00000025475.17	0.277846	1.334	4.96736	0.268553	0.788274	NA	0	0	1.11139	0	0	0	1	0	Adgra1	protein_coding	chr7	5386
ENSMUSG00000031486.15	34.0632	0.351738	0.790502	0.444955	0.656352	0.999934	26.6809	29.7002	57.7921	22.0797	25	33	52	24	Adgra2	protein_coding	chr8	5775
ENSMUSG00000029090.12	2368.52	0.267602	0.178888	1.49592	0.134674	0.999934	2146.21	2117.71	3051.87	2158.29	2011	2353	2746	2346	Adgra3	protein_coding	chr5	8113
ENSMUSG00000034730.17	20.3879	0.734439	0.965405	0.760757	0.446802	NA	17.0758	13.5001	28.896	22.0797	16	15	26	24	Adgrb1	protein_coding	chr15	7222
ENSMUSG00000033569.17	22.0656	-0.0826583	0.933159	-0.088579	0.929416	NA	22.412	22.5001	16.6708	26.6796	21	25	15	29	Adgrb3	protein_coding	chr1	18559
ENSMUSG00000044017.16	9.89763	-0.179188	1.39443	-0.128502	0.897751	NA	9.60514	9.90006	4.44554	15.6398	9	11	4	17	Adgrd1	protein_coding	chr5	8321
ENSMUSG00000004730.15	1.22361	0.353007	4.2759	0.0825573	0.934204	NA	2.13447	0	0	2.75996	2	0	0	3	Adgre1	protein_coding	chr17	3238
ENSMUSG00000002885.14	753.458	0.181647	0.207735	0.874418	0.381891	0.999934	679.83	732.604	783.527	817.869	637	814	705	889	Adgre5	protein_coding	chr8	3757
ENSMUSG00000041293.5	154.937	-0.421568	0.37833	-1.11429	0.265156	0.999934	200.641	151.201	166.708	101.199	188	168	150	110	Adgrf1	protein_coding	chr17	3853
ENSMUSG00000057899.6	2.17751	-0.647464	2.81468	-0.230031	0.818068	NA	1.06724	4.50003	2.22277	0.919988	1	5	2	1	Adgrf2	protein_coding	chr17	3284
ENSMUSG00000067642.11	2.44931	-0.464876	2.60697	-0.17832	0.858472	NA	2.13447	3.60002	2.22277	1.83998	2	4	2	2	Adgrf3	protein_coding	chr5	3285
ENSMUSG00000023918.12	0.999654	0.0450804	3.90966	0.0115305	0.9908	NA	1.06724	0.900005	1.11139	0.919988	1	1	1	1	Adgrf4	protein_coding	chr17	3060
ENSMUSG00000056492.6	28.9576	-0.0258079	0.829058	-0.0311291	0.975167	0.999934	34.1516	24.3001	23.3391	34.0396	32	27	21	37	Adgrf5	protein_coding	chr17	9010
ENSMUSG00000031785.16	563.747	-0.0943593	0.233807	-0.403578	0.686523	0.999934	564.569	594.903	469.005	626.512	529	661	422	681	Adgrg1	protein_coding	chr8	5421
ENSMUSG00000031298.15	10.8463	-1.17262	1.32382	-0.885784	0.375734	NA	11.7396	18.0001	4.44554	9.19988	11	20	4	10	Adgrg2	protein_coding	chrX	5278
ENSMUSG00000060470.7	7.69886	1.81776	1.56936	1.15828	0.24675	NA	3.20171	3.60002	11.1139	12.8798	3	4	10	14	Adgrg3	protein_coding	chr8	6905
ENSMUSG00000061577.12	10.1639	-2.8684	1.6088	-1.78295	0.0745949	NA	17.0758	15.3001	0	8.27989	16	17	0	9	Adgrg5	protein_coding	chr8	3137
ENSMUSG00000039116.6	24.8104	-0.312651	0.893053	-0.350092	0.72627	NA	25.6137	27.9002	14.448	31.2796	24	31	13	34	Adgrg6	protein_coding	chr10	12228
ENSMUSG00000022755.4	6430.08	-0.0268121	0.147063	-0.182317	0.855334	0.999934	6668.1	6311.74	6183.75	6556.75	6248	7013	5564	7127	Adgrg7	protein_coding	chr16	2698
ENSMUSG00000013033.16	56.758	-0.392682	0.591999	-0.663314	0.507129	0.999934	64.0342	64.8004	46.6782	51.5193	60	72	42	56	Adgrl1	protein_coding	chr8	8587
ENSMUSG00000028184.12	879.233	0.0277193	0.198876	0.13938	0.88915	0.999934	897.547	843.305	932.453	843.629	841	937	839	917	Adgrl2	protein_coding	chr3	14198
ENSMUSG00000037605.16	0.450003	-1.81261	4.93254	-0.367481	0.71326	NA	0	1.80001	0	0	0	2	0	0	Adgrl3	protein_coding	chr5	17750
ENSMUSG00000069170.14	14.4569	0.193677	1.14574	0.169041	0.865764	NA	13.8741	12.6001	11.1139	20.2397	13	14	10	22	Adgrv1	protein_coding	chr13	24878
ENSMUSG00000074207.10	10716.3	0.213606	0.151386	1.411	0.158245	0.999934	10739.6	8921.75	14006.8	9197.12	10063	9913	12603	9997	Adh1	protein_coding	chr3	2233
ENSMUSG00000028138.8	1494.71	-0.171701	0.195726	-0.877254	0.380349	0.999934	1536.82	1600.21	1126.95	1714.86	1440	1778	1014	1864	Adh5	protein_coding	chr3	5408
ENSMUSG00000053054.13	5.55501	-0.0499229	1.81488	-0.0275076	0.978055	NA	4.26895	6.30004	8.89109	2.75996	4	7	8	3	Adh6a	protein_coding	chr3	2542
ENSMUSG00000055301.8	5.65466	0.482668	1.78194	0.270867	0.786493	NA	5.33619	3.60002	10.0025	3.67995	5	4	9	4	Adh7	protein_coding	chr3	3787
ENSMUSG00000025911.14	29.1193	0.162513	0.818517	0.198545	0.842619	0.999934	35.2188	20.7001	31.1188	29.4396	33	23	28	32	Adhfe1	protein_coding	chr1	3780
ENSMUSG00000020629.12	236.691	0.180677	0.312982	0.577274	0.563754	0.999934	230.523	213.301	260.064	242.877	216	237	234	264	Adi1	protein_coding	chr12	1886
ENSMUSG00000044405.4	4.90757	0.195146	1.90555	0.102409	0.918432	NA	5.33619	3.60002	3.33416	7.3599	5	4	3	8	Adig	protein_coding	chr2	810
ENSMUSG00000026457.14	3483.28	0.0460817	0.152958	0.30127	0.763208	0.999934	3643.55	3207.62	3824.28	3257.68	3414	3564	3441	3541	Adipor1	protein_coding	chr1	5025
ENSMUSG00000030168.13	4308.9	0.00324557	0.149922	0.0216484	0.982728	0.999934	4308.44	4298.42	4199.93	4428.82	4037	4776	3779	4814	Adipor2	protein_coding	chr6	5979
ENSMUSG00000039197.10	2652.63	0.00119902	0.17277	0.00693999	0.994463	0.999934	2652.08	2626.21	2291.68	3040.56	2485	2918	2062	3305	Adk	protein_coding	chr14	8526
ENSMUSG00000030790.15	78.3535	-0.113034	0.513325	-0.220199	0.825716	0.999934	68.3032	95.4005	73.3515	76.359	64	106	66	83	Adm	protein_coding	chr7	1619
ENSMUSG00000054136.6	0.544656	0.0456629	4.88765	0.00934252	0.992546	NA	1.06724	0	1.11139	0	1	0	1	0	Adm2	protein_coding	chr15	1298
ENSMUSG00000051149.15	51.5173	0.235324	0.620138	0.37947	0.704339	0.999934	56.5636	38.7002	61.1262	49.6793	53	43	55	54	Adnp	protein_coding	chr2	5350
ENSMUSG00000053950.10	526.143	-0.111565	0.232355	-0.480149	0.631122	0.999934	519.745	573.303	483.453	528.073	487	637	435	574	Adnp2	protein_coding	chr18	5012
ENSMUSG00000057134.5	575.872	0.071516	0.228971	0.312336	0.754785	0.999934	530.417	593.103	606.817	573.152	497	659	546	623	Ado	protein_coding	chr10	4445
ENSMUSG00000042429.8	18.4411	-1.03485	1.01775	-1.01681	0.309244	NA	23.4792	26.1001	12.2252	11.9598	22	29	11	13	Adora1	protein_coding	chr1	5785
ENSMUSG00000020178.6	10.4124	-0.424058	1.34531	-0.315213	0.7526	NA	14.9413	9.00005	6.66831	11.0399	14	10	6	12	Adora2a	protein_coding	chr10	3062
ENSMUSG00000018500.2	21.2593	0.32187	0.949908	0.338843	0.734728	NA	12.8068	25.2001	16.6708	30.3596	12	28	15	33	Adora2b	protein_coding	chr11	1845
ENSMUSG00000000562.5	4.71068	1.22685	1.94975	0.629234	0.529196	NA	2.13447	3.60002	6.66831	6.43992	2	4	6	7	Adora3	protein_coding	chr3	3729
ENSMUSG00000025236.11	451.383	-0.0348316	0.258474	-0.134759	0.892803	0.999934	410.886	503.103	481.23	410.315	385	559	433	446	Adpgk	protein_coding	chr9	9609
ENSMUSG00000002844.9	277.096	0.181124	0.294273	0.615496	0.538227	0.999934	272.146	246.601	320.079	269.556	255	274	288	293	Adprh	protein_coding	chr16	2966
ENSMUSG00000031448.12	3.03577	-0.45263	2.36213	-0.19162	0.84804	NA	4.26895	2.70002	3.33416	1.83998	4	3	3	2	Adprhl1	protein_coding	chr8	5856
ENSMUSG00000042558.16	346.375	-0.0900635	0.27148	-0.331749	0.740078	0.999934	367.13	345.602	370.091	302.676	344	384	333	329	Adprhl2	protein_coding	chr4	2475
ENSMUSG00000020910.16	228.842	0.420838	0.321476	1.30908	0.190508	0.999934	209.179	182.701	251.173	272.316	196	203	226	296	Adprm	protein_coding	chr11	1977
ENSMUSG00000050541.14	1.03042	-0.823566	4.62902	-0.177914	0.858791	NA	3.20171	0	0	0.919988	3	0	0	1	Adra1b	protein_coding	chr11	3382
ENSMUSG00000033717.5	436.794	-0.0601	0.273858	-0.219457	0.826294	0.999934	358.592	504.003	264.51	620.072	336	560	238	674	Adra2a	protein_coding	chr19	3801
ENSMUSG00000035283.4	0.491811	-2.39757	4.89228	-0.490072	0.624083	NA	1.06724	0.900005	0	0	1	1	0	0	Adrb1	protein_coding	chr19	2491
ENSMUSG00000045730.3	23.3227	1.05026	0.940536	1.11666	0.264138	NA	10.6724	19.8001	38.8985	23.9197	10	22	35	26	Adrb2	protein_coding	chr18	2143
ENSMUSG00000031489.15	1.53327	-0.772825	3.27377	-0.236065	0.813382	NA	3.20171	0.900005	1.11139	0.919988	3	1	1	1	Adrb3	protein_coding	chr8	3376
ENSMUSG00000039041.15	779.487	0.0988122	0.206636	0.478195	0.632512	0.999934	769.478	734.404	862.435	751.63	721	816	776	817	Adrm1	protein_coding	chr2	4457
ENSMUSG00000022407.10	907.81	0.429695	0.197471	2.17599	0.0295562	0.681582	748.133	798.305	983.576	1101.23	701	887	885	1197	Adsl	protein_coding	chr15	5634
ENSMUSG00000015961.8	1569.6	0.0165106	0.173229	0.0953108	0.924068	0.999934	1566.7	1554.31	1602.62	1554.78	1468	1727	1442	1690	Adss	protein_coding	chr1	4531
ENSMUSG00000011148.14	2.87466	0.904012	2.47783	0.36484	0.715231	NA	3.20171	0.900005	5.55693	1.83998	3	1	5	2	Adssl1	protein_coding	chr12	2090
ENSMUSG00000058022.14	462.971	-0.142603	0.255544	-0.558037	0.576819	0.999934	481.324	484.203	365.646	520.713	451	538	329	566	Adtrp	protein_coding	chr13	2866
ENSMUSG00000020473.13	1.2725	-1.38027	3.86226	-0.357375	0.720811	NA	1.06724	1.80001	2.22277	0	1	2	2	0	Aebp1	protein_coding	chr11	4058
ENSMUSG00000030232.18	993.382	-0.0182973	0.195507	-0.0935889	0.925436	0.999934	976.522	1021.51	1038.03	937.468	915	1135	934	1019	Aebp2	protein_coding	chr6	9851
ENSMUSG00000030609.18	437.03	0.285098	0.264982	1.07592	0.281965	0.999934	358.592	427.502	537.911	424.114	336	475	484	461	Aen	protein_coding	chr7	5801
ENSMUSG00000054452.10	4908.35	-0.110999	0.147544	-0.75231	0.451865	0.999934	5201.71	4993.23	4772.29	4666.18	4874	5548	4294	5072	Aes	protein_coding	chr10	3334
ENSMUSG00000065022.1	1.0475	-0.748155	4.18243	-0.17888	0.858032	NA	1.06724	0.900005	2.22277	0	1	1	2	0	AF357341	snoRNA	chr12	75
ENSMUSG00000077711.1	9.90214	0.798282	1.36348	0.585476	0.558228	NA	6.40342	8.10005	12.2252	12.8798	6	9	11	14	AF357399	snoRNA	chr7	125
ENSMUSG00000065749.1	0.491811	-2.39757	4.89228	-0.490072	0.624083	NA	1.06724	0.900005	0	0	1	1	0	0	AF357428	snoRNA	chr12	69
ENSMUSG00000057116.5	0.496806	0.0450723	4.9968	0.00902022	0.992803	NA	1.06724	0	0	0.919988	1	0	0	1	AF366264	protein_coding	chr8	3157
ENSMUSG00000039313.14	23.7827	0.368588	0.984575	0.374362	0.708135	NA	12.8068	26.1001	43.344	12.8798	12	29	39	14	AF529169	protein_coding	chr9	7268
ENSMUSG00000029094.12	247.906	-0.488054	0.307654	-1.58637	0.112655	0.999934	293.49	285.302	212.275	200.557	275	317	191	218	Afap1	protein_coding	chr5	12651
[truncated: 26,350 more rows]

## Sheet: Tuft Cell markers_Colon
	baseMean	log2FoldChange	lfcSE	stat	pvalue	padj	WT_1739_Colon_normalized	WT_1743_Colon_normalized	KO_1740_Colon_normalized	KO_1741_Colon_normalized	WT_1739_Colon_original	WT_1743_Colon_original	KO_1740_Colon_original	KO_1741_Colon_original	genename	genetype	chrom	length
ENSMUSG00000028777.8	55.8753	-1.06808	0.619201	-1.72492	0.084541	0.999934	77.9083	72.0004	26.6733	46.9194	73	80	24	51	Gnat3	protein_coding	chr5	1361
ENSMUSG00000040770.5	2.85042	-1.75872	2.76002	-0.637214	0.523985	NA	3.20171	3.60002	0	4.59994	3	4	0	5	Il25	protein_coding	chr14	1064
ENSMUSG00000027797.15	475.671	-1.23018	0.306304	-4.0162	5.91435e-05	0.0100855	620.065	673.204	167.819	441.594	581	748	151	480	Dclk1	protein_coding	chr3	15296
ENSMUSG00000009246.14	343.352	-1.06445	0.294747	-3.61139	0.000304561	0.0349301	418.357	497.703	155.594	301.756	392	553	140	328	Trpm5	protein_coding	chr7	6398
ENSMUSG00000032015.16	29.2669	-1.63695	0.857978	-1.90791	0.0564027	0.934544	39.4878	46.8003	7.7797	22.9997	37	52	7	25	Pou2f3	protein_coding	chr9	3088
ENSMUSG00000021919.8	25.2926	-1.45656	0.897902	-1.62218	0.104765	NA	39.4878	34.2002	10.0025	17.4798	37	38	9	19	Chat	protein_coding	chr14	4703
ENSMUSG00000032487.8	0.946809	-1.66636	4.35035	-0.383041	0.701689	NA	1.06724	1.80001	0	0.919988	1	2	0	1	Ptgs2	protein_coding	chr1	4580
ENSMUSG00000024379.3	1.69069	1.53744	3.40969	0.450903	0.65206	NA	0	2.70002	2.22277	1.83998	0	3	2	2	Tslp	protein_coding	chr18	1133
ENSMUSG00000027762.6	4.97903	-1.75054	2.16236	-0.809553	0.418197	NA	5.33619	6.30004	0	8.27989	5	7	0	9	Sucnr1	protein_coding	chr3	1640
ENSMUSG00000010175.13	33.9385	-0.363962	0.762725	-0.477187	0.633229	0.999934	24.5465	53.1003	22.2277	35.8795	23	59	20	39	Prox1	protein_coding	chr1	8390
ENSMUSG00000015966.17	46.4653	-0.733082	0.659811	-1.11105	0.266547	0.999934	59.7653	55.8003	28.896	41.3995	56	62	26	45	Il17rb	protein_coding	chr14	3707
ENSMUSG00000026395.16	296.759	-1.45387	0.337588	-4.30663	1.65762e-05	0.00387254	451.441	406.802	108.916	219.877	423	452	98	239	Ptprc	protein_coding	chr1	18313
ENSMUSG00000000567.5	735.557	-0.265017	0.20936	-1.26584	0.205571	0.999934	741.73	864.905	629.044	706.551	695	961	566	768	Sox9	protein_coding	chr11	4135
ENSMUSG00000019429.7	21.9901	-1.20301	1.04112	-1.1555	0.247887	NA	24.5465	28.8002	3.33416	31.2796	23	32	3	34	Ffar3	protein_coding	chr7	1849
ENSMUSG00000003032.8	13135.5	-0.135792	0.140073	-0.969442	0.332325	0.999934	14484.5	12989.8	13643.4	11424.4	13572	14433	12276	12418	Klf4	protein_coding	chr4	3049
ENSMUSG00000017057.9	2672.6	0.0044834	0.159148	0.0281712	0.977526	0.999934	2779.09	2551.51	2895.16	2464.65	2604	2835	2605	2679	Il13ra1	protein_coding	chrX	3712
ENSMUSG00000030748.9	679.379	-0.55447	0.221567	-2.50249	0.0123323	0.422822	789.756	821.705	476.785	629.272	740	913	429	684	Il4ra	protein_coding	chr7	6002
ENSMUSG00000026739.13	350.318	0.0458947	0.271884	0.168803	0.865952	0.999934	312.701	378.002	354.532	356.035	293	420	319	387	Bmi1	protein_coding	chr2	3974
ENSMUSG00000047250.13	51.8156	-0.788298	0.627948	-1.25536	0.20935	0.999934	58.698	71.1004	27.7846	49.6793	55	79	25	54	Ptgs1	protein_coding	chr2	3884
ENSMUSG00000017311.15	540.112	0.52	0.24311	2.13895	0.0324401	0.708307	395.945	493.203	672.388	598.912	371	548	605	651	Pyy	protein_coding	chr11	631
ENSMUSG00000032532.7	14.1888	1.52006	1.16395	1.30595	0.19157	NA	7.47066	7.20004	20.0049	22.0797	7	8	18	24	Cck	protein_coding	chr9	1305
ENSMUSG00000073043.5	1359.13	-0.208508	0.178609	-1.1674	0.243049	0.999934	1453.58	1460.71	1242.53	1279.7	1362	1623	1118	1391	Atoh1	protein_coding	chr6	2121
ENSMUSG00000029378.5	1140	-0.870277	0.216199	-4.02535	5.68897e-05	0.00998063	1727.86	1143.91	1196.96	491.274	1619	1271	1077	534	Areg	protein_coding	chr5	1215
ENSMUSG00000023067.14	1357.46	0.38559	0.190494	2.02416	0.0429536	0.822641	1170.76	1170.01	1761.55	1327.54	1097	1300	1585	1443	Cdkn1a	protein_coding	chr17	3553
ENSMUSG00000076431.4	728.277	-0.205206	0.212579	-0.965316	0.334386	0.999934	769.478	788.404	620.153	735.07	721	876	558	799	Sox4	protein_coding	chr13	4795
ENSMUSG00000026175.12	13528.2	0.0616896	0.138854	0.444276	0.656843	0.999934	13159	13319.2	13772.3	13862.4	12330	14799	12392	15068	Vil1	protein_coding	chr1	3551
ENSMUSG00000025515.15	266358	0.0865017	0.439054	0.197018	0.843813	0.999934	217005	282284	177861	388285	203333	313647	160035	422054	Muc2	protein_coding	chr7	7127
ENSMUSG00000045826.8	13.4051	-1.00437	1.20568	-0.833036	0.404824	NA	22.412	13.5001	6.66831	11.0399	21	15	6	12	Ptprcap	protein_coding	chr19	927
ENSMUSG00000021194.6	616.273	0.0792506	0.232395	0.341017	0.733091	0.999934	586.98	603.903	529.02	745.19	550	671	476	810	Chga	protein_coding	chr12	2756
ENSMUSG00000027995.10	384.819	-0.55952	0.329344	-1.69889	0.0893399	0.999934	502.669	396.002	210.052	430.554	471	440	189	468	Tlr2	protein_coding	chr3	3014
ENSMUSG00000031639.12	623.958	-0.39098	0.248266	-1.57484	0.115293	0.999934	702.242	696.604	413.436	683.551	658	774	372	743	Tlr3	protein_coding	chr8	5207
ENSMUSG00000039005.13	919.265	-0.22532	0.213458	-1.05557	0.291164	0.999934	1055.5	923.405	752.408	945.748	989	1026	677	1028	Tlr4	protein_coding	chr4	5556
ENSMUSG00000079164.8	65.6293	-0.435597	0.564886	-0.771124	0.440634	0.999934	55.4963	91.8005	33.3416	81.8789	52	102	30	89	Tlr5	protein_coding	chr1	4790
ENSMUSG00000051498.6	24.6662	0.719124	0.882129	0.815214	0.41495	NA	20.2775	17.1001	30.0074	31.2796	19	19	27	34	Tlr6	protein_coding	chr5	3727
ENSMUSG00000044583.13	0.266809	-1.24165	4.96683	-0.249988	0.802597	NA	1.06724	0	0	0	1	0	0	0	Tlr7	protein_coding	chrX	4082
ENSMUSG00000040522.5	0.946809	-1.66636	4.35035	-0.383041	0.701689	NA	1.06724	1.80001	0	0.919988	1	2	0	1	Tlr8	protein_coding	chrX	3586

## Sheet: log2FC0.5pV0.05ProtCod
	baseMean	log2FoldChange	lfcSE	stat	pvalue	padj	WT_1739_Colon_normalized	WT_1743_Colon_normalized	KO_1740_Colon_normalized	KO_1741_Colon_normalized	WT_1739_Colon_original	WT_1743_Colon_original	KO_1740_Colon_original	KO_1741_Colon_original	genename	genetype	chrom	length
ENSMUSG00000024670.16	8.01035	-6.42705	2.13992	-3.00342	0.00266968	NA	14.9413	17.1001	0	0	14	19	0	0	Cd6	protein_coding	chr19	3404
ENSMUSG00000033847.15	2994.8	-4.96369	1.24866	-3.97522	7.03149e-05	0.0115352	4901.82	6425.14	53.3465	598.912	4593	7139	48	651	Pla2g4c	protein_coding	chr7	3747
ENSMUSG00000051497.15	11.2281	-4.71807	1.69176	-2.78886	0.00528943	NA	10.6724	32.4002	0	1.83998	10	36	0	2	Kcnj16	protein_coding	chr11	3936
ENSMUSG00000038179.13	6.53	-4.70108	2.13248	-2.20452	0.027488	NA	16.0086	9.00005	1.11139	0	15	10	1	0	Slamf7	protein_coding	chr1	4577
ENSMUSG00000022899.9	120.529	-4.21288	0.58978	-7.14313	9.1226e-13	6.95464e-10	419.424	35.1002	26.6733	0.919988	393	39	24	1	Slc15a2	protein_coding	chr16	7361
ENSMUSG00000062939.11	8.27119	-4.17533	1.87672	-2.2248	0.0260946	NA	21.3447	9.90006	0	1.83998	20	11	0	2	Stat4	protein_coding	chr1	3872
ENSMUSG00000050961.4	9.69993	-4.14409	1.739	-2.38304	0.0171705	NA	11.7396	24.3001	0	2.75996	11	27	0	3	AY358078	protein_coding	chr14	1461
ENSMUSG00000078815.8	6.54104	-4.01551	2.04387	-1.96466	0.0494531	NA	14.9413	9.00005	2.22277	0	14	10	2	0	Cacng6	protein_coding	chr7	1977
ENSMUSG00000026532.7	857.354	-3.7792	0.670841	-5.63352	1.76569e-08	7.89081e-06	1215.58	1931.41	53.3465	229.077	1139	2146	48	249	Spta1	protein_coding	chr1	9691
ENSMUSG00000079845.8	14.869	-3.54432	1.30663	-2.71257	0.00667637	NA	33.0844	21.6001	1.11139	3.67995	31	24	1	4	Xlr4a	protein_coding	chrX	1535
ENSMUSG00000000817.10	11.5457	-3.49871	1.57486	-2.2216	0.0263105	NA	29.8826	11.7001	0	4.59994	28	13	0	5	Fasl	protein_coding	chr1	1937
ENSMUSG00000055561.9	13.6504	-3.48604	1.34563	-2.59064	0.00957977	NA	19.2103	30.6002	1.11139	3.67995	18	34	1	4	Spink5	protein_coding	chr18	4785
ENSMUSG00000040026.8	16.3952	-3.38344	1.32576	-2.55207	0.0107084	NA	26.6809	29.7002	0	9.19988	25	33	0	10	Saa3	protein_coding	chr7	2606
ENSMUSG00000023132.8	104.159	-3.25317	1.46408	-2.22198	0.0262844	0.641517	209.179	146.701	5.55693	55.1993	196	163	5	60	Gzma	protein_coding	chr13	1006
ENSMUSG00000025091.3	860.232	-3.18839	0.966422	-3.29916	0.000969731	0.0821445	1669.16	1365.31	84.4653	321.996	1564	1517	76	350	Pnliprp2	protein_coding	chr19	1567
ENSMUSG00000053961.7	9.16139	-3.15297	1.57268	-2.00484	0.0449801	NA	13.8741	18.9001	1.11139	2.75996	13	21	1	3	Ang5	protein_coding	chr14	700
ENSMUSG00000043931.10	12.8948	-3.04406	1.46753	-2.07428	0.0380532	NA	23.4792	18.9001	0	9.19988	22	21	0	10	Gimap7	protein_coding	chr6	2325
ENSMUSG00000026193.15	233.099	-3.03938	0.390783	-7.77766	7.38806e-15	7.9791e-12	326.575	491.403	23.3391	91.0788	306	546	21	99	Fn1	protein_coding	chr1	11685
ENSMUSG00000024610.14	940.152	-3.03148	0.265933	-11.3994	4.2107e-30	1.81902e-26	1594.45	1733.41	135.589	297.156	1494	1926	122	323	Cd74	protein_coding	chr18	1410
ENSMUSG00000040808.4	314.825	-2.92812	0.310086	-9.44293	3.62495e-21	6.71133e-18	415.155	701.104	66.6831	76.359	389	779	60	83	S100g	protein_coding	chrX	480
ENSMUSG00000036594.14	269.81	-2.85415	0.323162	-8.83194	1.02874e-18	1.57071e-15	438.635	507.603	51.1237	81.8789	411	564	46	89	H2-Aa	protein_coding	chr17	1874
ENSMUSG00000021200.14	16.1652	-2.74608	1.27929	-2.14657	0.0318278	NA	42.6895	13.5001	1.11139	7.3599	40	15	1	8	Asb2	protein_coding	chr12	3542
ENSMUSG00000030156.5	17.2844	-2.5969	1.22213	-2.12489	0.0335956	NA	36.2861	20.7001	1.11139	11.0399	34	23	1	12	Cd69	protein_coding	chr6	6509
ENSMUSG00000022650.7	13440.1	-2.53587	0.778459	-3.25755	0.00112378	0.0933604	20883.7	23542.3	1989.38	7345.18	19568	26158	1790	7984	Retnlb	protein_coding	chr16	696
ENSMUSG00000035042.2	49.1702	-2.47643	0.715571	-3.46077	0.000538626	0.0562951	108.858	58.5003	10.0025	19.3197	102	65	9	21	Ccl5	protein_coding	chr11	960
ENSMUSG00000025582.4	41.2696	-2.44414	0.779458	-3.13569	0.00171448	0.123442	28.8154	114.301	10.0025	11.9598	27	127	9	13	Nptx1	protein_coding	chr11	5217
ENSMUSG00000040747.9	16.2681	-2.43952	1.12951	-2.1598	0.0307885	NA	28.8154	26.1001	5.55693	4.59994	27	29	5	5	Cd53	protein_coding	chr3	1742
ENSMUSG00000060586.10	151.359	-2.42529	0.403397	-6.01216	1.83073e-09	9.88595e-07	232.658	276.302	36.6757	59.7992	218	307	33	65	H2-Eb1	protein_coding	chr17	1184
ENSMUSG00000053977.13	36.784	-2.38218	0.858579	-2.77456	0.00552773	0.273776	85.379	37.8002	5.55693	18.3998	80	42	5	20	Cd8a	protein_coding	chr6	3637
ENSMUSG00000048163.13	21.3476	-2.38212	0.995489	-2.39292	0.0167149	NA	37.3533	34.2002	5.55693	8.27989	35	38	5	9	Selplg	protein_coding	chr5	4272
ENSMUSG00000060615.5	17301.2	-2.35114	0.194957	-12.0598	1.72267e-33	2.23258e-29	26664.9	30705.5	4019.88	7814.38	24985	34117	3617	8494	Ang4	protein_coding	chr14	709
ENSMUSG00000079547.3	97.5507	-2.32724	0.490199	-4.74755	2.059e-06	0.000555931	166.489	158.401	26.6733	38.6395	156	176	24	42	H2-DMb1	protein_coding	chr17	1485
ENSMUSG00000036960.10	51.8677	-2.32204	0.653682	-3.55225	0.000381952	0.0426733	91.7824	81.0005	14.448	20.2397	86	90	13	22	Clca2	protein_coding	chr3	4646
ENSMUSG00000022488.9	16.8414	-2.30087	1.13883	-2.02037	0.0433449	NA	34.1516	21.6001	3.33416	8.27989	32	24	3	9	Nckap1l	protein_coding	chr15	5935
ENSMUSG00000027347.18	18.5508	-2.29344	1.14216	-2.00798	0.0446454	NA	38.4205	21.6001	2.22277	11.9598	36	24	2	13	Rasgrp1	protein_coding	chr2	5600
ENSMUSG00000078921.3	29.8579	-2.2856	0.870162	-2.62664	0.00862325	0.351438	36.2861	60.3003	4.44554	18.3998	34	67	4	20	Tgtp2	protein_coding	chr11	2938
ENSMUSG00000004612.9	17.879	-2.28267	1.07751	-2.11847	0.034135	NA	35.2188	24.3001	5.55693	6.43992	33	27	5	7	Nkg7	protein_coding	chr7	914
ENSMUSG00000031101.6	20.8157	-2.27597	1.12836	-2.01706	0.0436898	NA	50.1602	18.0001	2.22277	12.8798	47	20	2	14	Sash3	protein_coding	chrX	2677
ENSMUSG00000073421.5	444.187	-2.27413	0.25768	-8.82539	1.09077e-18	1.57071e-15	690.503	780.304	131.144	174.798	647	867	118	190	H2-Ab1	protein_coding	chr17	1637
ENSMUSG00000032292.8	21.6721	-2.2691	1.11652	-2.0323	0.0421235	NA	32.0171	32.4002	1.11139	21.1597	30	36	1	23	Nr2e3	protein_coding	chr9	3369
ENSMUSG00000044337.5	30.8149	-2.26547	0.825943	-2.74289	0.00609009	0.289112	48.0257	54.0003	11.1139	10.1199	45	60	10	11	Ackr3	protein_coding	chr1	3348
ENSMUSG00000073125.10	76.5305	-2.25548	0.591657	-3.81214	0.00013777	0.0189947	105.656	140.401	12.2252	47.8394	99	156	11	52	Xlr3b	protein_coding	chrX	3780
ENSMUSG00000055254.15	119.756	-2.14901	0.548564	-3.91751	8.94669e-05	0.0139698	208.111	168.301	18.8936	83.7189	195	187	17	91	Ntrk2	protein_coding	chr13	19292
ENSMUSG00000027102.4	27.2226	-2.08329	0.991949	-2.1002	0.0357112	0.740507	39.4878	40.5002	2.22277	26.6796	37	45	2	29	Hoxd8	protein_coding	chr2	2744
ENSMUSG00000078922.9	25.3153	-2.07986	0.906016	-2.29562	0.0216979	NA	30.9499	51.3003	8.89109	10.1199	29	57	8	11	Tgtp1	protein_coding	chr11	3205
ENSMUSG00000047798.15	23.3189	-2.033	0.956049	-2.12645	0.0334654	NA	35.2188	38.7002	5.55693	13.7998	33	43	5	15	Cd300lf	protein_coding	chr11	5149
ENSMUSG00000050592.8	41.2228	-2.03002	0.809913	-2.50647	0.0121944	0.420319	48.0257	74.7004	4.44554	37.7195	45	83	4	41	Fam78a	protein_coding	chr2	5973
ENSMUSG00000051457.7	24.8521	-2.0212	0.938743	-2.15309	0.0313117	NA	50.1602	29.7002	6.66831	12.8798	47	33	6	14	Spn	protein_coding	chr7	4681
ENSMUSG00000021280.9	32.6845	-2.00969	0.898745	-2.23611	0.0253447	0.629247	44.824	51.3003	3.33416	31.2796	42	57	3	34	Exoc3l4	protein_coding	chr12	5650
ENSMUSG00000030165.16	30.6205	-1.99462	0.899753	-2.21685	0.0266333	0.644452	59.7653	36.0002	5.55693	21.1597	56	40	5	23	Klrd1	protein_coding	chr6	1281
ENSMUSG00000079180.4	80.2701	-1.97688	0.524873	-3.7664	0.000165616	0.0215635	108.858	147.601	33.3416	31.2796	102	164	30	34	Mptx2	protein_coding	chr1	794
ENSMUSG00000054072.11	287.44	-1.96527	0.303467	-6.47607	9.41439e-11	5.54593e-08	429.029	484.203	96.6906	139.838	402	538	87	152	Iigp1	protein_coding	chr18	3121
ENSMUSG00000047115.15	275.238	-1.9367	0.323504	-5.98663	2.14231e-09	1.06786e-06	448.24	421.202	88.9109	142.598	420	468	80	155	Fam221a	protein_coding	chr6	4537
ENSMUSG00000022504.10	74.3282	-1.87028	0.535966	-3.48956	0.000483822	0.051821	105.656	127.801	28.896	34.9595	99	142	26	38	Ciita	protein_coding	chr16	9535
ENSMUSG00000020601.8	71.5537	-1.86357	0.631219	-2.95233	0.00315381	0.187493	129.136	90.0005	15.5594	51.5193	121	100	14	56	Trib2	protein_coding	chr12	4335
ENSMUSG00000025163.6	42.1358	-1.85436	0.76725	-2.4169	0.0156534	0.493597	72.5721	55.8003	8.89109	31.2796	68	62	8	34	Cd7	protein_coding	chr11	1133
ENSMUSG00000039607.15	35.99	-1.84102	0.790221	-2.32976	0.0198188	0.554756	54.4291	55.8003	8.89109	24.8397	51	62	8	27	Rbms3	protein_coding	chr9	10413
ENSMUSG00000027204.13	109.74	-1.82127	0.543166	-3.35307	0.000799207	0.0742665	151.548	171.001	18.8936	97.5187	142	190	17	106	Fbn1	protein_coding	chr2	12128
ENSMUSG00000047810.8	29.013	-1.78333	0.840876	-2.1208	0.0339384	0.723769	42.6895	46.8003	10.0025	16.5598	40	52	9	18	Ccdc88b	protein_coding	chr19	4959
ENSMUSG00000024164.15	172.018	-1.77344	0.368381	-4.81415	1.47825e-06	0.000445538	259.339	272.702	83.3539	72.679	243	303	75	79	C3	protein_coding	chr17	5143
ENSMUSG00000020674.17	102.208	-1.72718	0.554194	-3.11657	0.00182968	0.128476	148.346	149.401	20.0049	91.0788	139	166	18	99	Pxdn	protein_coding	chr12	9648
ENSMUSG00000027876.4	7595.19	-1.72053	0.169809	-10.1321	3.97808e-24	1.03112e-20	10620.1	12676.6	3927.64	3156.48	9951	14085	3534	3431	Reg4	protein_coding	chr3	1021
ENSMUSG00000038721.8	68.4657	-1.69267	0.666689	-2.53892	0.0111196	0.40142	88.5807	102.601	10.0025	72.679	83	114	9	79	Hoxb7	protein_coding	chr11	1544
ENSMUSG00000039264.9	43.0469	-1.68912	0.750411	-2.25093	0.0243899	0.618577	75.7738	53.1003	11.1139	32.1996	71	59	10	35	Gimap3	protein_coding	chr6	2577
ENSMUSG00000038209.12	1011.49	-1.67953	0.649243	-2.5869	0.0096844	0.37532	1529.35	1476.91	294.517	745.19	1433	1641	265	810	Itln1	protein_coding	chr1	1141
ENSMUSG00000054435.16	47.4765	-1.66109	0.694721	-2.39102	0.0168018	0.509974	90.7152	54.0003	16.6708	28.5196	85	60	15	31	Gimap4	protein_coding	chr6	1837
ENSMUSG00000026358.13	113.659	-1.64998	0.51909	-3.1786	0.00147988	0.111507	223.053	121.501	35.5643	74.519	209	135	32	81	Rgs1	protein_coding	chr1	6947
ENSMUSG00000021453.2	348.538	-1.64142	0.27411	-5.98818	2.12198e-09	1.06786e-06	534.686	521.103	164.485	173.878	501	579	148	189	Gadd45g	protein_coding	chr13	1173
ENSMUSG00000104713.4	79.4244	-1.64076	0.57618	-2.84764	0.00440445	0.240851	131.27	104.401	22.2277	59.7992	123	116	20	65	Gbp6	protein_coding	chr5	5954
ENSMUSG00000041794.13	226.108	-1.6327	0.405516	-4.02622	5.668e-05	0.00998063	319.104	338.402	55.5693	191.357	299	376	50	208	Myrip	protein_coding	chr9	5537
ENSMUSG00000039936.18	40.0703	-1.61507	0.738842	-2.18595	0.0288192	0.674714	85.379	37.8002	17.7822	19.3197	80	42	16	21	Pik3cd	protein_coding	chr4	6259
ENSMUSG00000089715.12	81.6193	-1.60837	0.513974	-3.12929	0.00175229	0.124779	108.858	135.901	31.1188	50.5993	102	151	28	55	Cbx6	protein_coding	chr15	10609
ENSMUSG00000024401.14	43.324	-1.60699	0.699644	-2.29687	0.021626	0.580276	75.7738	54.9003	17.7822	24.8397	71	61	16	27	Tnf	protein_coding	chr17	1639
ENSMUSG00000026531.4	103924	-1.60593	0.136657	-11.7515	6.93535e-32	4.4941e-28	142174	170980	49049.9	53489.9	133217	189977	44134	58142	Mptx1	protein_coding	chr1	799
ENSMUSG00000096768.7	60.1417	-1.60507	0.745721	-2.15237	0.031368	0.697306	53.3619	97.2006	4.44554	85.5589	50	108	4	93	Gm47283	protein_coding	chrY	1124
ENSMUSG00000056293.12	14514.3	-1.60023	0.144045	-11.1093	1.13045e-28	3.66267e-25	19303.1	24419.8	6886.15	7448.22	18087	27133	6196	8096	Gsdmc2	protein_coding	chr15	2315
ENSMUSG00000028255.6	209251	-1.57647	0.165023	-9.55302	1.25966e-21	2.72087e-18	304835	317877	82922.7	131370	285630	353195	74612	142795	Clca1	protein_coding	chr3	3777
ENSMUSG00000019699.16	77.892	-1.56765	0.520183	-3.01364	0.00258134	0.165615	102.455	130.501	34.453	44.1594	96	145	31	48	Akt3	protein_coding	chr1	5124
ENSMUSG00000030775.10	37.1471	-1.56591	0.781058	-2.00485	0.044979	0.838464	68.3032	42.3002	12.2252	25.7597	64	47	11	28	Trat1	protein_coding	chr16	4665
ENSMUSG00000033220.7	55.1109	-1.55719	0.66001	-2.35934	0.0183074	0.534208	78.9756	80.1005	14.448	46.9194	74	89	13	51	Rac2	protein_coding	chr15	3103
ENSMUSG00000022032.14	71.3283	-1.54373	0.595094	-2.5941	0.00948401	0.373607	96.0514	108.001	17.7822	63.4792	90	120	16	69	Scara5	protein_coding	chr14	6093
ENSMUSG00000060550.15	116.321	-1.5303	0.456531	-3.35201	0.000802261	0.0742665	172.892	169.201	42.2327	80.9589	162	188	38	88	H2-Q7	protein_coding	chr17	4265
ENSMUSG00000000386.15	460.789	-1.52736	0.309208	-4.93959	7.82888e-07	0.000241577	804.697	559.803	177.822	300.836	754	622	160	327	Mx1	protein_coding	chr16	3785
ENSMUSG00000027219.13	99.8773	-1.49984	0.563677	-2.66081	0.0077953	0.331236	137.674	138.601	21.1163	102.119	129	154	19	111	Slc28a2	protein_coding	chr2	4208
ENSMUSG00000010651.4	70.5439	-1.48297	0.663062	-2.23655	0.025316	0.629247	55.4963	126.901	7.7797	91.9988	52	141	7	100	Acaa1b	protein_coding	chr9	1962
ENSMUSG00000022148.16	75.0173	-1.47878	0.560807	-2.63689	0.00836711	0.348892	117.396	100.801	26.6733	55.1993	110	112	24	60	Fyb	protein_coding	chr15	5384
ENSMUSG00000038884.14	70.9458	-1.47616	0.543673	-2.71516	0.00662446	0.303368	117.396	91.8005	37.7871	36.7995	110	102	34	40	A230050P20Rik	protein_coding	chr9	3417
ENSMUSG00000035493.10	69.0991	-1.46597	0.666526	-2.19942	0.027848	0.661007	100.32	87.3005	13.3366	75.439	94	97	12	82	Tgfbi	protein_coding	chr13	3771
ENSMUSG00000026395.16	296.759	-1.45387	0.337588	-4.30663	1.65762e-05	0.00387254	451.441	406.802	108.916	219.877	423	452	98	239	Ptprc	protein_coding	chr1	18313
ENSMUSG00000035697.14	43.4553	-1.44972	0.73476	-1.97306	0.0484891	0.862028	71.5049	53.1003	13.3366	35.8795	67	59	12	39	Arhgap45	protein_coding	chr10	4478
ENSMUSG00000020826.8	225.797	-1.44363	0.386007	-3.7399	0.000184091	0.0229405	416.223	246.601	92.245	148.118	390	274	83	161	Nos2	protein_coding	chr11	4412
ENSMUSG00000029298.15	44.6264	-1.44161	0.688771	-2.09301	0.036348	0.746545	72.5721	57.6003	18.8936	29.4396	68	64	17	32	Gbp9	protein_coding	chr5	5173
ENSMUSG00000038037.5	78.1086	-1.43485	0.566399	-2.53328	0.0112999	0.40455	131.27	94.5005	27.7846	58.8792	123	105	25	64	Socs1	protein_coding	chr16	2908
ENSMUSG00000026787.3	44.1219	-1.4229	0.676451	-2.10349	0.0354233	0.739269	61.8998	66.6004	22.2277	25.7597	58	74	20	28	Gad2	protein_coding	chr2	5876
ENSMUSG00000028268.14	207.055	-1.42264	0.377835	-3.76525	0.000166385	0.0215635	311.633	283.502	76.6856	156.398	292	315	69	170	Gbp3	protein_coding	chr3	3265
ENSMUSG00000025492.6	182.822	-1.39881	0.378452	-3.69614	0.000218901	0.0270187	281.751	245.701	77.797	126.038	264	273	70	137	Ifitm3	protein_coding	chr7	678
ENSMUSG00000074151.13	275.788	-1.37955	0.323241	-4.26788	1.97342e-05	0.00433484	367.13	420.302	107.804	207.917	344	467	97	226	Nlrc5	protein_coding	chr8	8493
ENSMUSG00000020901.13	129.766	-1.37769	0.432982	-3.18186	0.00146334	0.110906	167.556	201.601	47.7896	102.119	157	224	43	111	Pik3r5	protein_coding	chr11	5550
ENSMUSG00000044294.8	46.7445	-1.36681	0.656937	-2.08058	0.0374727	0.756092	67.2359	67.5004	25.5619	26.6796	63	75	23	29	Krt84	protein_coding	chr15	2640
ENSMUSG00000031377.11	66.6245	-1.35474	0.591519	-2.29027	0.0220057	0.584414	101.388	87.3005	24.4505	53.3593	95	97	22	58	Bmx	protein_coding	chrX	3092
ENSMUSG00000032035.15	104.799	-1.35324	0.466549	-2.90054	0.00372519	0.208998	182.498	120.601	54.4579	61.6392	171	134	49	67	Ets1	protein_coding	chr9	8476
ENSMUSG00000012428.9	114.167	-1.34158	0.436321	-3.07475	0.00210677	0.142952	219.851	108.001	85.5767	43.2394	206	120	77	47	Steap4	protein_coding	chr5	3155
ENSMUSG00000030707.15	57.4775	-1.3404	0.67439	-1.98757	0.0468594	0.848764	109.925	54.9003	20.0049	45.0794	103	61	18	49	Coro1a	protein_coding	chr7	2783
ENSMUSG00000093661.1	74.2539	-1.33581	0.558548	-2.39157	0.0167763	0.509974	112.06	98.1006	28.896	57.9592	105	109	26	63	Eif4e3	protein_coding	chr6	2515
ENSMUSG00000004933.17	98.3765	-1.33252	0.515226	-2.58629	0.00970157	0.37532	153.682	123.301	35.5643	80.9589	144	137	32	88	Matk	protein_coding	chr10	4594
ENSMUSG00000027199.14	168.036	-1.32853	0.402689	-3.29916	0.000969762	0.0821445	281.751	198.901	75.5742	115.918	264	221	68	126	Gatm	protein_coding	chr2	3001
ENSMUSG00000031364.2	98.7036	-1.30659	0.480383	-2.71988	0.00653055	0.301195	151.548	128.701	45.5668	68.9991	142	143	41	75	Grpr	protein_coding	chrX	2523
ENSMUSG00000029095.17	147.34	-1.30585	0.394827	-3.30739	0.000941711	0.0821445	226.254	193.501	76.6856	92.9188	212	215	69	101	Ablim2	protein_coding	chr5	7047
ENSMUSG00000052631.14	100.635	-1.28671	0.479081	-2.68579	0.00723593	0.317105	131.27	150.301	40.0099	80.9589	123	167	36	88	Sh2d6	protein_coding	chr6	1737
ENSMUSG00000039304.11	320.443	-1.2847	0.340594	-3.77195	0.000161977	0.0214206	462.114	427.502	118.918	273.236	433	475	107	297	Tnfsf10	protein_coding	chr3	5266
ENSMUSG00000032418.15	197.366	-1.2734	0.396144	-3.21448	0.0013068	0.102643	262.54	279.002	66.6831	181.238	246	310	60	197	Me1	protein_coding	chr9	3848
ENSMUSG00000072235.6	119.96	-1.26143	0.454741	-2.77396	0.00553789	0.273776	161.153	171.001	45.5668	102.119	151	190	41	111	Tuba1a	protein_coding	chr15	1803
ENSMUSG00000024427.6	75.0304	-1.24579	0.546599	-2.27917	0.0226571	0.594406	106.724	100.801	62.2376	30.3596	100	112	56	33	Spry4	protein_coding	chr18	4587
ENSMUSG00000037649.9	91.1495	-1.24025	0.481346	-2.57663	0.00997679	0.378068	109.925	146.701	50.0124	57.9592	103	163	45	63	H2-DMa	protein_coding	chr17	1641
ENSMUSG00000027797.15	475.671	-1.23018	0.306304	-4.0162	5.91435e-05	0.0100855	620.065	673.204	167.819	441.594	581	748	151	480	Dclk1	protein_coding	chr3	15296
ENSMUSG00000053702.16	131.095	-1.22275	0.426135	-2.8694	0.00411257	0.22875	155.817	205.201	51.1237	112.239	146	228	46	122	Nebl	protein_coding	chr2	15235
ENSMUSG00000052212.6	7516.58	-1.21918	0.183539	-6.64264	3.08116e-11	2.10168e-08	9667.04	11054.8	3206.35	6138.16	9058	12283	2885	6672	Cd177	protein_coding	chr7	2840
ENSMUSG00000034528.15	90.7464	-1.21695	0.53097	-2.29193	0.0219095	0.583053	129.136	117.901	32.2302	83.7189	121	131	29	91	Hsd17b13	protein_coding	chr5	2157
ENSMUSG00000010663.4	194.479	-1.19659	0.346267	-3.45567	0.00054892	0.0569121	231.59	307.802	92.245	146.278	217	342	83	159	Fads1	protein_coding	chr19	3456
ENSMUSG00000003283.14	186.088	-1.19145	0.389013	-3.06275	0.00219312	0.148036	255.07	252.901	74.4628	161.918	239	281	67	176	Hck	protein_coding	chr2	2092
ENSMUSG00000005973.6	103.763	-1.18957	0.478676	-2.48513	0.0129506	0.433693	143.01	141.301	43.344	87.3989	134	157	39	95	Rcn1	protein_coding	chr2	3196
ENSMUSG00000034116.17	174.628	-1.18561	0.389433	-3.04445	0.00233104	0.153352	262.54	219.601	81.1312	135.238	246	244	73	147	Vav1	protein_coding	chr17	3688
ENSMUSG00000052271.7	106.049	-1.17764	0.455577	-2.58495	0.00973945	0.375337	128.068	166.501	68.9059	60.7192	120	185	62	66	Bhlha15	protein_coding	chr5	3494
ENSMUSG00000024030.6	83.1568	-1.16692	0.504184	-2.31447	0.0206419	0.569703	138.741	92.7005	53.3465	47.8394	130	103	48	52	Abcg1	protein_coding	chr17	4066
ENSMUSG00000025701.12	109.377	-1.15798	0.47147	-2.4561	0.0140455	0.45912	150.48	146.701	45.5668	94.7588	141	163	41	103	Alox5	protein_coding	chr6	4106
ENSMUSG00000027737.10	118.671	-1.14974	0.429082	-2.67953	0.00737267	0.320637	136.606	191.701	70.0173	76.359	128	213	63	83	Slc7a11	protein_coding	chr3	13922
ENSMUSG00000038700.4	101.189	-1.14639	0.558112	-2.05405	0.0399711	0.78801	133.405	126.001	26.6733	118.678	125	140	24	129	Hoxb5	protein_coding	chr11	2786
ENSMUSG00000054404.13	125.684	-1.13206	0.51839	-2.1838	0.0289772	0.674714	146.212	169.201	30.0074	157.318	137	188	27	171	Slfn5	protein_coding	chr11	6326
ENSMUSG00000022537.18	186.773	-1.12538	0.406636	-2.76754	0.00564803	0.277259	257.204	241.201	71.1287	177.558	241	268	64	193	Tmem44	protein_coding	chr16	8893
ENSMUSG00000024338.14	806.382	-1.11185	0.23384	-4.75472	1.98718e-06	0.000555931	1156.89	1037.71	414.547	616.392	1084	1153	373	670	Psmb8	protein_coding	chr17	2736
ENSMUSG00000032593.5	121.616	-1.10566	0.430478	-2.56845	0.0102155	0.38264	157.951	171.901	60.0148	96.5987	148	191	54	105	Amigo3	protein_coding	chr9	2543
ENSMUSG00000057400.14	128.427	-1.0961	0.468564	-2.33928	0.0193208	0.549794	138.741	207.901	110.027	57.0393	130	231	99	62	Ces1c	protein_coding	chr8	2323
ENSMUSG00000028270.12	324.961	-1.09448	0.280157	-3.90666	9.3579e-05	0.0144379	466.383	419.402	203.384	210.677	437	466	183	229	Gbp2	protein_coding	chr3	2516
ENSMUSG00000031257.14	1472.21	-1.09348	0.212804	-5.13845	2.7702e-07	9.97272e-05	2150.48	1842.31	769.079	1126.99	2015	2047	692	1225	Nox1	protein_coding	chrX	3307
ENSMUSG00000040136.10	87.8087	-1.08969	0.513273	-2.12303	0.0337515	0.723769	107.791	126.001	35.5643	81.8789	101	140	32	89	Abcc8	protein_coding	chr7	8090
ENSMUSG00000001334.9	226.929	-1.08758	0.32942	-3.30151	0.000961671	0.0821445	298.826	315.902	120.03	172.958	280	351	108	188	Fndc5	protein_coding	chr4	2763
ENSMUSG00000036053.17	71.7765	-1.0781	0.541342	-1.99153	0.0464223	0.846178	83.2445	109.801	33.3416	60.7192	78	122	30	66	Fmnl2	protein_coding	chr2	5636
ENSMUSG00000021589.13	110.203	-1.07002	0.508101	-2.10591	0.0352119	0.737232	139.808	144.001	35.5643	121.438	131	160	32	132	Rhobtb3	protein_coding	chr13	5781
ENSMUSG00000009246.14	343.352	-1.06445	0.294747	-3.61139	0.000304561	0.0349301	418.357	497.703	155.594	301.756	392	553	140	328	Trpm5	protein_coding	chr7	6398
ENSMUSG00000026826.13	132.23	-1.06159	0.44015	-2.41188	0.0158707	0.496003	181.43	170.101	57.7921	119.598	170	189	52	130	Nr4a2	protein_coding	chr2	4059
ENSMUSG00000055748.12	31463.3	-1.06085	0.164604	-6.44484	1.15724e-10	6.52081e-08	38843.2	46152.3	22752.3	18105.4	36396	51280	20472	19680	Gsdmc4	protein_coding	chr15	2087
ENSMUSG00000067235.14	89.0248	-1.05664	0.497591	-2.12351	0.0337114	0.723769	127.001	112.501	46.6782	69.9191	119	125	42	76	H2-Q10	protein_coding	chr17	4348
ENSMUSG00000020719.14	11162.9	-1.0477	0.140564	-7.45353	9.08754e-14	7.85164e-11	15666	14435.2	7394.05	7156.59	14679	16039	6653	7779	Ddx5	protein_coding	chr11	5775
ENSMUSG00000041920.14	139.77	-1.04268	0.396467	-2.62993	0.00854026	0.350259	181.43	194.401	81.1312	102.119	170	216	73	111	Slc16a6	protein_coding	chr11	4883
ENSMUSG00000030796.17	82.379	-1.03829	0.510205	-2.03505	0.041846	0.810649	106.724	113.401	42.2327	67.1591	100	126	38	73	Tead2	protein_coding	chr7	4788
ENSMUSG00000042834.14	188.68	-1.0344	0.409431	-2.52645	0.0115223	0.408003	273.213	223.201	78.9084	179.398	256	248	71	195	Nrep	protein_coding	chr18	2513
ENSMUSG00000054942.13	409.168	-1.03371	0.269424	-3.83674	0.000124678	0.0175633	538.955	554.403	216.72	326.596	505	616	195	355	Miga1	protein_coding	chr3	11605
ENSMUSG00000037321.17	964.048	-1.03309	0.215301	-4.79834	1.59984e-06	0.000460754	1293.49	1282.51	515.683	764.51	1212	1425	464	831	Tap1	protein_coding	chr17	5476
ENSMUSG00000046460.14	186.1	-1.02669	0.349622	-2.93658	0.00331851	0.192412	205.977	292.502	97.802	148.118	193	325	88	161	Sh2d7	protein_coding	chr9	2759
ENSMUSG00000008136.14	434.395	-1.01467	0.250643	-4.04825	5.16013e-05	0.00955361	617.93	542.703	321.19	255.757	579	603	289	278	Fhl2	protein_coding	chr1	1897
ENSMUSG00000073409.12	113.374	-1.00654	0.502389	-2.0035	0.0451233	0.839022	169.691	126.001	45.5668	112.239	159	140	41	122	H2-Q6	protein_coding	chr17	2085
ENSMUSG00000039621.13	111.31	-1.00305	0.453826	-2.2102	0.0270915	0.650195	160.086	135.901	60.0148	89.2388	150	151	54	97	Prex1	protein_coding	chr2	10266
ENSMUSG00000036957.8	111.108	-0.985327	0.502007	-1.96277	0.0496724	0.87059	136.606	144.001	37.7871	126.038	128	160	34	137	Lrfn3	protein_coding	chr7	2886
ENSMUSG00000001930.17	89.1214	-0.98489	0.482749	-2.04017	0.0413333	0.804323	125.934	110.701	65.5718	54.2793	118	123	59	59	Vwf	protein_coding	chr6	16064
ENSMUSG00000029275.18	248.09	-0.984029	0.310286	-3.17136	0.00151725	0.113662	322.306	336.602	173.376	160.078	302	374	156	174	Gfi1	protein_coding	chr5	3187
ENSMUSG00000029270.10	178.426	-0.981998	0.368601	-2.66412	0.0077189	0.330155	236.927	234.001	95.5792	147.198	222	260	86	160	Fam69a	protein_coding	chr5	2892
ENSMUSG00000045932.12	346.589	-0.978413	0.326418	-2.99743	0.0027227	0.171292	482.391	421.202	158.928	323.836	452	468	143	352	Ifit2	protein_coding	chr19	3927
ENSMUSG00000004952.13	1002.52	-0.977232	0.194043	-5.03616	4.74958e-07	0.000153886	1266.81	1393.21	675.723	674.351	1187	1548	608	733	Rasa4	protein_coding	chr5	7485
ENSMUSG00000042284.10	403.883	-0.960673	0.296581	-3.23916	0.00119884	0.097717	593.384	468.903	215.609	337.636	556	521	194	367	Itga1	protein_coding	chr13	18599
ENSMUSG00000054169.7	1021.43	-0.958488	0.201788	-4.74998	2.03437e-06	0.000555931	1255.07	1429.21	567.918	833.509	1176	1588	511	906	Ceacam10	protein_coding	chr7	1496
ENSMUSG00000027514.14	492.156	-0.948626	0.268885	-3.528	0.000418719	0.0459882	662.754	622.804	258.953	424.114	621	692	233	461	Zbp1	protein_coding	chr2	3529
ENSMUSG00000068245.14	381.353	-0.936789	0.318392	-2.94225	0.00325836	0.192078	469.584	501.303	158.928	395.595	440	557	143	430	Phf11d	protein_coding	chr14	4498
ENSMUSG00000043668.13	376.233	-0.934838	0.28165	-3.31914	0.000902937	0.0801511	510.139	473.403	212.275	309.116	478	526	191	336	Tox3	protein_coding	chr8	3356
ENSMUSG00000003355.7	174.004	-0.926137	0.358619	-2.58251	0.00980855	0.375337	195.304	261.001	104.47	135.238	183	290	94	147	Fkbp11	protein_coding	chr15	2706
ENSMUSG00000040543.16	326.453	-0.925279	0.27745	-3.33494	0.000853182	0.0773233	378.869	477.003	203.384	246.557	355	530	183	268	Pitpnm3	protein_coding	chr11	9815
ENSMUSG00000078853.8	379.638	-0.919407	0.278092	-3.30613	0.000945944	0.0821445	456.778	526.503	196.715	338.556	428	585	177	368	Igtp	protein_coding	chr11	2022
ENSMUSG00000028262.13	516.597	-0.915414	0.286042	-3.20028	0.00137294	0.106532	695.839	632.704	251.173	486.674	652	703	226	529	Clca3a2	protein_coding	chr3	3974
ENSMUSG00000046159.16	145.134	-0.91416	0.414205	-2.20703	0.0273123	0.653075	157.951	211.501	61.1262	149.958	148	235	55	163	Chrm3	protein_coding	chr13	6253
ENSMUSG00000051379.12	675.145	-0.912629	0.25321	-3.60424	0.000313072	0.0355914	875.135	864.905	342.307	618.232	820	961	308	672	Flrt3	protein_coding	chr2	4865
ENSMUSG00000055994.15	134.939	-0.91163	0.410047	-2.22323	0.0262001	0.641517	148.346	199.801	65.5718	126.038	139	222	59	137	Nod2	protein_coding	chr8	5014
ENSMUSG00000046312.4	276.451	-0.908479	0.346719	-2.62022	0.00878733	0.356758	368.197	338.402	127.809	271.396	345	376	115	295	AI464131	protein_coding	chr4	4701
ENSMUSG00000072620.3	141.048	-0.907743	0.410491	-2.21136	0.027011	0.649466	200.641	166.501	81.1312	115.918	188	185	73	126	Slfn2	protein_coding	chr11	1664
ENSMUSG00000046718.8	273.627	-0.901549	0.341058	-2.64339	0.00820816	0.344417	332.978	360.902	120.03	280.596	312	401	108	305	Bst2	protein_coding	chr8	903
ENSMUSG00000006777.7	140.463	-0.898889	0.408668	-2.19956	0.0278381	0.661007	200.641	164.701	83.3539	113.159	188	183	75	123	Krt23	protein_coding	chr11	1565
ENSMUSG00000037033.9	6773.75	-0.897082	0.167783	-5.34668	8.95837e-08	3.5182e-05	7923.17	9503.15	3534.21	6134.48	7424	10559	3180	6668	Clca3b	protein_coding	chr3	3361
ENSMUSG00000027359.16	162.084	-0.891776	0.379815	-2.34792	0.0188785	0.541295	197.439	220.501	87.7995	142.598	185	245	79	155	Slc27a2	protein_coding	chr2	3754
ENSMUSG00000020072.15	229.234	-0.886258	0.319613	-2.77291	0.00555579	0.273776	346.852	246.601	195.604	127.878	325	274	176	139	Pbld2	protein_coding	chr10	2480
ENSMUSG00000038963.15	125.796	-0.878471	0.422544	-2.079	0.0376169	0.756092	146.212	176.401	65.5718	114.998	137	196	59	125	Slco4a1	protein_coding	chr2	4799
ENSMUSG00000026797.16	328.583	-0.872653	0.286242	-3.04865	0.0022987	0.152775	435.433	409.502	278.958	190.437	408	455	251	207	Stxbp1	protein_coding	chr2	4997
ENSMUSG00000029378.5	1140	-0.870277	0.216199	-4.02535	5.68897e-05	0.00998063	1727.86	1143.91	1196.96	491.274	1619	1271	1077	534	Areg	protein_coding	chr5	1215
ENSMUSG00000102752.1	135.311	-0.865797	0.410723	-2.10798	0.0350327	0.736527	169.691	177.301	75.5742	118.678	159	197	68	129	Gm7694	protein_coding	chr1	3827
ENSMUSG00000035692.6	254.862	-0.865431	0.330395	-2.61939	0.00880883	0.356758	313.768	334.802	128.921	241.957	294	372	116	263	Isg15	protein_coding	chr4	756
ENSMUSG00000028885.8	125.204	-0.861266	0.413257	-2.0841	0.0371515	0.756092	154.749	168.301	86.6881	91.0788	145	187	78	99	Smpdl3b	protein_coding	chr4	2006
ENSMUSG00000061414.8	2248.75	-0.855905	0.16813	-5.09072	3.56701e-07	0.000124942	2764.14	3015.92	1402.57	1812.38	2590	3351	1262	1970	Cracr2a	protein_coding	chr6	7824
ENSMUSG00000055827.13	4890.9	-0.846943	0.155342	-5.45213	4.97687e-08	2.15001e-05	6172.9	6385.54	3789.83	3215.36	5784	7095	3410	3495	Gsdmc3	protein_coding	chr15	2328
ENSMUSG00000028527.18	265.311	-0.843534	0.344088	-2.45151	0.0142259	0.459771	437.567	252.001	165.596	206.077	410	280	149	224	Ak4	protein_coding	chr4	4646
ENSMUSG00000020573.17	183.91	-0.843082	0.378209	-2.22914	0.0258044	0.634809	228.389	235.801	91.1336	180.318	214	262	82	196	Pik3cg	protein_coding	chr12	8426
ENSMUSG00000008090.14	245.267	-0.841412	0.322898	-2.60582	0.00916556	0.366623	341.516	288.002	155.594	195.957	320	320	140	213	Fgfrl1	protein_coding	chr5	2782
ENSMUSG00000038473.14	166.966	-0.83034	0.370328	-2.24217	0.0249503	0.627874	219.851	207.001	106.693	134.318	206	230	96	146	Nos1ap	protein_coding	chr1	7249
ENSMUSG00000028635.7	182.113	-0.82403	0.360718	-2.28442	0.0223471	0.589853	209.179	252.001	98.9133	168.358	196	280	89	183	Edn2	protein_coding	chr4	1462
ENSMUSG00000044162.12	973.014	-0.821873	0.209661	-3.92001	8.85436e-05	0.0139698	1408.75	1084.51	670.166	728.63	1320	1205	603	792	Tnip3	protein_coding	chr6	10916
ENSMUSG00000027296.7	197.77	-0.819787	0.342673	-2.39233	0.0167418	0.509974	245.465	258.301	124.475	162.838	230	287	112	177	Itpka	protein_coding	chr2	1818
ENSMUSG00000027225.7	521.433	-0.818767	0.279783	-2.92643	0.00342872	0.197494	651.015	653.404	257.842	523.473	610	726	232	569	Duoxa2	protein_coding	chr2	1592
ENSMUSG00000021068.16	156.146	-0.816282	0.405048	-2.01527	0.0438759	0.827189	223.053	173.701	88.9109	138.918	209	193	80	151	Nin	protein_coding	chr12	17005
ENSMUSG00000038400.15	216.508	-0.815066	0.347551	-2.34516	0.0190187	0.542912	250.801	298.802	186.713	129.718	235	332	168	141	Pmepa1	protein_coding	chr2	4913
ENSMUSG00000034795.14	220.463	-0.810296	0.323788	-2.50255	0.0123302	0.422822	319.104	242.101	184.49	136.158	299	269	166	148	Ccdc122	protein_coding	chr14	1985
ENSMUSG00000024236.18	135.584	-0.803515	0.407106	-1.97372	0.0484131	0.861859	181.43	162.901	86.6881	111.319	170	181	78	121	Svil	protein_coding	chr18	10701
ENSMUSG00000028256.16	632.404	-0.801559	0.220456	-3.63591	0.000276998	0.0323414	795.092	811.805	437.886	484.834	745	902	394	527	Odf2l	protein_coding	chr3	11140
ENSMUSG00000096727.2	390.246	-0.797547	0.271594	-2.93654	0.00331893	0.192412	510.139	477.903	244.505	328.436	478	531	220	357	Psmb9	protein_coding	chr17	3659
ENSMUSG00000021587.5	393.461	-0.791411	0.296525	-2.66895	0.00760891	0.326528	474.921	502.203	195.604	401.115	445	558	176	436	Pcsk1	protein_coding	chr13	5604
ENSMUSG00000040296.15	663.614	-0.789551	0.268382	-2.94189	0.00326211	0.192078	812.168	829.805	323.413	689.071	761	922	291	749	Ddx58	protein_coding	chr4	7050
ENSMUSG00000013076.17	185.924	-0.788177	0.352993	-2.23284	0.0255597	0.632163	236.927	233.101	120.03	153.638	222	259	108	167	Amotl1	protein_coding	chr9	10064
ENSMUSG00000032012.8	312.81	-0.7701	0.281832	-2.73248	0.00628589	0.296109	341.516	446.403	195.604	267.716	320	496	176	291	Nectin1	protein_coding	chr9	5653
ENSMUSG00000036805.13	1215.41	-0.770097	0.20396	-3.77573	0.000159538	0.0213156	1516.54	1528.21	731.292	1085.59	1421	1698	658	1180	Noxa1	protein_coding	chr2	1617
ENSMUSG00000042677.7	731.779	-0.765803	0.226306	-3.38393	0.000714569	0.0671073	1021.35	824.405	499.012	582.352	957	916	449	633	Zc3h12a	protein_coding	chr4	2882
ENSMUSG00000023034.7	630.8	-0.76474	0.222929	-3.43043	0.000602635	0.0608233	924.227	655.204	586.812	356.955	866	728	528	388	Nr4a1	protein_coding	chr15	3509
ENSMUSG00000036459.15	264.856	-0.764153	0.302403	-2.52694	0.0115062	0.408003	315.902	351.002	201.161	191.357	296	390	181	208	Wtip	protein_coding	chr7	2383
ENSMUSG00000031981.7	911.915	-0.763563	0.202087	-3.77839	0.000157848	0.0213095	1181.43	1113.31	633.49	719.431	1107	1237	570	782	Capn9	protein_coding	chr8	2414
ENSMUSG00000020638.8	368.956	-0.761905	0.299881	-2.5407	0.0110632	0.401163	478.122	439.202	203.384	355.115	448	488	183	386	Cmpk2	protein_coding	chr12	4163
ENSMUSG00000017830.15	365.91	-0.757668	0.30874	-2.45407	0.0141251	0.459771	494.131	415.802	202.272	351.435	463	462	182	382	Dhx58	protein_coding	chr11	3272
ENSMUSG00000034330.10	239.133	-0.757296	0.315186	-2.4027	0.0162747	0.503388	260.406	338.402	143.369	214.357	244	376	129	233	Plcg2	protein_coding	chr8	4298
ENSMUSG00000024935.10	1101.63	-0.755019	0.187859	-4.01908	5.84264e-05	0.0100855	1369.27	1397.71	817.98	821.549	1283	1553	736	893	Slc1a1	protein_coding	chr19	6170
ENSMUSG00000091971.3	1145.83	-0.754563	0.194038	-3.88873	0.00010077	0.0151857	330.844	2548.81	196.715	1506.94	310	2832	177	1638	Hspa1a	protein_coding	chr17	2967
ENSMUSG00000070034.13	177.992	-0.753654	0.354827	-2.124	0.0336698	0.723769	249.734	198.001	140.035	124.198	234	220	126	135	Sp110	protein_coding	chr1	6781
ENSMUSG00000022346.15	276.986	-0.750294	0.298967	-2.50962	0.0120862	0.418816	372.466	323.102	198.938	213.437	349	359	179	232	Myc	protein_coding	chr15	2717
ENSMUSG00000028068.14	613.152	-0.750226	0.261936	-2.86416	0.00418111	0.231569	735.326	773.104	316.745	627.432	689	859	285	682	Iqgap3	protein_coding	chr3	11384
ENSMUSG00000000204.16	3655.99	-0.745339	0.173152	-4.30454	1.67332e-05	0.00387254	4781.22	4355.12	2387.26	3100.36	4480	4839	2148	3370	Slfn4	protein_coding	chr11	3964
ENSMUSG00000030107.10	258.744	-0.738328	0.345262	-2.13846	0.0324796	0.708307	308.432	322.202	125.587	278.756	289	358	113	303	Usp18	protein_coding	chr6	2790
ENSMUSG00000030659.14	203.99	-0.734807	0.33498	-2.19358	0.0282653	0.668465	239.061	270.002	136.7	170.198	224	300	123	185	Nucb2	protein_coding	chr7	2331
ENSMUSG00000054951.3	421.488	-0.73057	0.287206	-2.54371	0.0109682	0.400416	584.846	463.503	256.73	380.875	548	515	231	414	9130008F23Rik	protein_coding	chr17	2161
ENSMUSG00000060802.8	5982.9	-0.729353	0.189006	-3.85889	0.000113902	0.016548	7493.07	7254.94	3436.4	5747.16	7021	8061	3092	6247	B2m	protein_coding	chr2	860
ENSMUSG00000040253.15	327.696	-0.724726	0.290259	-2.49683	0.0125309	0.427357	443.971	372.602	220.054	274.156	416	414	198	298	Gbp7	protein_coding	chr3	5614
ENSMUSG00000031765.8	3956.29	-0.723134	0.173714	-4.16279	3.14377e-05	0.00646717	5023.49	4749.33	3663.13	2389.21	4707	5277	3296	2597	Mt1	protein_coding	chr8	1246
ENSMUSG00000031093.14	320.019	-0.721392	0.296036	-2.43684	0.0148163	0.475294	383.138	405.902	185.601	305.436	359	451	167	332	Dock11	protein_coding	chrX	9240
ENSMUSG00000069874.7	637.739	-0.720858	0.236621	-3.04646	0.00231553	0.153109	778.016	798.305	386.762	587.872	729	887	348	639	Irgm2	protein_coding	chr11	3690
ENSMUSG00000050520.4	2914.96	-0.717436	0.157785	-4.54693	5.44329e-06	0.00138324	3792.96	3460.52	2209.43	2196.93	3554	3845	1988	2388	Cldn8	protein_coding	chr16	2356
ENSMUSG00000021733.10	4914.07	-0.715848	0.156504	-4.57398	4.78539e-06	0.00124037	6204.92	5995.83	3391.95	4063.59	5814	6662	3052	4417	Slc4a7	protein_coding	chr14	15205
ENSMUSG00000051314.11	342.067	-0.713801	0.283652	-2.51647	0.0118537	0.415878	394.878	448.203	202.272	322.916	370	498	182	351	Ffar2	protein_coding	chr7	2790
ENSMUSG00000020641.16	411.148	-0.703465	0.322171	-2.18351	0.0289981	0.674714	590.182	419.402	225.611	409.395	553	466	203	445	Rsad2	protein_coding	chr12	4335
ENSMUSG00000004633.17	408.725	-0.69768	0.302816	-2.30398	0.021224	0.578945	482.391	502.203	202.272	448.034	452	558	182	487	Chn2	protein_coding	chr6	5812
ENSMUSG00000054640.14	1105.1	-0.689177	0.236945	-2.90859	0.00363059	0.204576	1331.91	1341.91	590.146	1156.42	1248	1491	531	1257	Slc8a1	protein_coding	chr17	2934
ENSMUSG00000023829.9	362.802	-0.679664	0.292975	-2.31987	0.020348	0.567117	464.248	422.102	218.943	345.915	435	469	197	376	Slc22a1	protein_coding	chr17	2016
ENSMUSG00000026399.12	981.155	-0.676398	0.214678	-3.15076	0.00162845	0.118951	1242.26	1145.71	952.458	584.192	1164	1273	857	635	Cd55	protein_coding	chr1	4853
ENSMUSG00000031634.13	755.017	-0.669386	0.218739	-3.0602	0.00221188	0.148528	906.084	942.305	660.163	511.513	849	1047	594	556	Ufsp2	protein_coding	chr8	4407
ENSMUSG00000029009.17	321.145	-0.665663	0.279033	-2.38561	0.0170508	0.516304	370.331	416.702	223.389	274.156	347	463	201	298	Mthfr	protein_coding	chr4	7315
ENSMUSG00000019823.17	518.161	-0.66472	0.239291	-2.77788	0.00547152	0.273776	616.863	652.504	433.44	369.835	578	725	390	402	Mical1	protein_coding	chr10	6047
ENSMUSG00000033200.16	655.012	-0.663031	0.221046	-2.99952	0.00270408	0.17095	770.545	831.605	445.666	572.232	722	924	401	622	Tpsg1	protein_coding	chr17	1389
ENSMUSG00000037172.14	2295.52	-0.659803	0.161938	-4.07443	4.61274e-05	0.00887725	2624.34	2998.82	1663.74	1895.18	2459	3332	1497	2060	E330009J07Rik	protein_coding	chr6	7811
ENSMUSG00000028980.14	624.379	-0.656838	0.224785	-2.92207	0.00347708	0.199394	695.839	826.205	402.322	573.152	652	918	362	623	H6pd	protein_coding	chr4	5236
ENSMUSG00000031167.16	1871.42	-0.651849	0.189258	-3.44424	0.000572667	0.0589029	2445.04	2070.91	1880.46	1089.27	2291	2301	1692	1184	Rbm3	protein_coding	chrX	4698
ENSMUSG00000025574.13	371.074	-0.651525	0.275596	-2.36406	0.0180758	0.534208	416.223	482.403	222.277	363.395	390	536	200	395	Tk1	protein_coding	chr11	5198
ENSMUSG00000045193.13	456.126	-0.650405	0.244993	-2.65479	0.00793589	0.335013	672.359	440.102	437.886	274.156	630	489	394	298	Cirbp	protein_coding	chr10	2604
ENSMUSG00000037106.8	3396.95	-0.650129	0.173444	-3.74834	0.000178007	0.0223978	4368.2	3915.02	2339.47	2965.12	4093	4350	2105	3223	Fer1l6	protein_coding	chr15	8053
ENSMUSG00000024225.5	557.495	-0.648994	0.230705	-2.81309	0.00490684	0.25746	692.637	668.704	412.324	456.314	649	743	371	496	Clps	protein_coding	chr17	611
ENSMUSG00000046879.7	1131.49	-0.64773	0.198196	-3.26813	0.0010826	0.0911072	1271.08	1471.51	702.396	1080.99	1191	1635	632	1175	Irgm1	protein_coding	chr11	5810
ENSMUSG00000003062.13	560.575	-0.64648	0.239971	-2.694	0.00706004	0.31335	683.032	679.504	370.091	509.673	640	755	333	554	Stard3nl	protein_coding	chr13	5600
ENSMUSG00000002565.16	5747.22	-0.644709	0.15841	-4.06987	4.70399e-05	0.00887725	7191.04	6804.94	4038.78	4954.13	6738	7561	3634	5385	Scin	protein_coding	chr12	2999
ENSMUSG00000055148.7	251.495	-0.644089	0.309879	-2.07852	0.0376617	0.756092	220.918	396.902	154.483	233.677	207	441	139	254	Klf2	protein_coding	chr8	1847
ENSMUSG00000029860.16	649.64	-0.643021	0.217473	-2.95679	0.0031086	0.185657	787.621	796.505	505.681	508.753	738	885	455	553	Zyx	protein_coding	chr6	5390
ENSMUSG00000056999.14	1467.16	-0.638189	0.213056	-2.9954	0.00274086	0.171602	1431.17	2167.21	1205.85	1064.43	1341	2408	1085	1157	Ide	protein_coding	chr19	5823
ENSMUSG00000024664.4	280.023	-0.636197	0.312979	-2.03272	0.0420813	0.81399	316.969	360.902	260.064	182.158	297	401	234	198	Fads3	protein_coding	chr19	3269
ENSMUSG00000068566.12	928.601	-0.636179	0.200728	-3.16936	0.00152774	0.11379	1078.98	1175.41	635.713	824.309	1011	1306	572	896	Myadm	protein_coding	chr7	4480
ENSMUSG00000029810.15	463.431	-0.634171	0.247475	-2.56256	0.0103903	0.384256	561.367	564.303	327.859	400.195	526	627	295	435	Tmem176b	protein_coding	chr6	2371
ENSMUSG00000042726.14	788.759	-0.633803	0.227258	-2.78891	0.00528854	0.268126	963.715	941.405	500.124	749.79	903	1046	450	815	Trafd1	protein_coding	chr5	4486
ENSMUSG00000032827.15	1549.21	-0.63264	0.180399	-3.5069	0.000453362	0.0489631	1880.47	1880.11	1095.83	1340.42	1762	2089	986	1457	Ppp1r9a	protein_coding	chr6	14531
ENSMUSG00000027952.16	581.295	-0.62872	0.234118	-2.68548	0.00724252	0.317105	643.544	769.504	477.896	434.234	603	855	430	472	Pmvk	protein_coding	chr3	1713
ENSMUSG00000043705.7	1669.29	-0.627081	0.225188	-2.7847	0.00535778	0.270182	1709.71	2335.51	1553.72	1078.23	1602	2595	1398	1172	Capn13	protein_coding	chr17	2951
ENSMUSG00000089960.1	421.656	-0.625877	0.299374	-2.09062	0.036562	0.749261	432.231	550.803	191.158	512.433	405	612	172	557	Ugt1a1	protein_coding	chr1	2224
ENSMUSG00000074445.4	3190.45	-0.620739	0.182483	-3.40162	0.000669865	0.064939	3783.36	3890.72	3040.75	2046.97	3545	4323	2736	2225	Sprr2a3	protein_coding	chr3	2883
ENSMUSG00000010830.8	294.742	-0.620596	0.287779	-2.1565	0.0310446	0.697306	309.499	405.002	202.272	262.197	290	450	182	285	Kdelr3	protein_coding	chr15	1411
ENSMUSG00000047730.17	298998	-0.620028	0.133929	-4.62953	3.66504e-06	0.000969366	344566	379963	223800	247663	322858	422179	201370	269202	Fcgbp	protein_coding	chr7	10497
ENSMUSG00000032252.14	990.609	-0.614539	0.201995	-3.04234	0.00234747	0.153652	1260.41	1135.81	723.512	842.709	1181	1262	651	916	Glce	protein_coding	chr9	6828
ENSMUSG00000069267.2	948.519	-0.613567	0.198157	-3.09636	0.00195911	0.135054	1010.67	1275.31	615.708	892.388	947	1417	554	970	Hist1h3b	protein_coding	chr13	620
ENSMUSG00000060519.11	754.584	-0.609975	0.216078	-2.82294	0.00475849	0.252728	942.371	879.305	543.468	653.191	883	977	489	710	Tor3a	protein_coding	chr1	3892
ENSMUSG00000026425.15	319.345	-0.608464	0.280022	-2.17291	0.0297869	0.684465	377.802	393.302	263.398	242.877	354	437	237	264	Srgap2	protein_coding	chr1	12560
ENSMUSG00000031762.7	390.873	-0.604488	0.290985	-2.07739	0.037766	0.756488	437.567	495.903	388.985	241.037	410	551	350	262	Mt2	protein_coding	chr8	588
ENSMUSG00000001123.15	1072.31	-0.601529	0.215276	-2.79422	0.00520253	0.266407	1230.52	1323.01	644.604	1091.11	1153	1470	580	1186	Lgals9	protein_coding	chr11	2137
ENSMUSG00000023367.14	344.884	-0.599361	0.277448	-2.16026	0.0307522	0.696762	423.693	405.902	244.505	305.436	397	451	220	332	Tmem176a	protein_coding	chr6	3810
ENSMUSG00000033826.9	1142.18	-0.596806	0.186584	-3.1986	0.00138098	0.106532	1180.36	1573.21	801.309	1013.83	1106	1748	721	1102	Dnah8	protein_coding	chr17	14583
ENSMUSG00000022505.9	775.371	-0.591723	0.206788	-2.8615	0.0042164	0.23253	945.572	918.905	606.817	630.192	886	1021	546	685	Emp2	protein_coding	chr16	8644
ENSMUSG00000025145.13	589.264	-0.58923	0.225282	-2.61552	0.0089091	0.358578	669.158	745.204	425.661	517.033	627	828	383	562	Lrrc45	protein_coding	chr11	3293
ENSMUSG00000028327.14	456.445	-0.583282	0.257725	-2.26319	0.0236239	0.608646	552.829	537.303	307.854	427.794	518	597	277	465	Stra6l	protein_coding	chr4	9567
ENSMUSG00000019122.8	320	-0.582735	0.284959	-2.04498	0.0408573	0.801075	286.02	472.503	170.042	351.435	268	525	153	382	Ccl9	protein_coding	chr11	3045
ENSMUSG00000027513.11	4117.47	-0.582435	0.158271	-3.67999	0.00023324	0.0279888	5169.7	4704.33	3111.88	3483.99	4844	5227	2800	3787	Pck1	protein_coding	chr2	3429
ENSMUSG00000020817.16	801.22	-0.581994	0.213904	-2.72081	0.00651217	0.301195	963.715	952.205	561.25	727.71	903	1058	505	791	Rabep1	protein_coding	chr11	6868
ENSMUSG00000038286.11	293.569	-0.581751	0.290733	-2.00098	0.0453942	0.840177	361.793	342.002	221.166	249.317	339	380	199	271	Bphl	protein_coding	chr13	2945
ENSMUSG00000070348.5	1372.64	-0.576014	0.183346	-3.14168	0.00167981	0.121622	1525.08	1749.61	938.01	1277.86	1429	1944	844	1389	Ccnd1	protein_coding	chr7	4709
ENSMUSG00000096054.3	366.967	-0.574231	0.266365	-2.15581	0.0310986	0.697306	403.416	472.503	253.396	338.556	378	525	228	368	Syne1	protein_coding	chr10	40491
ENSMUSG00000040274.11	1244.67	-0.570048	0.230589	-2.47214	0.0134306	0.445167	1502.67	1423.81	730.18	1322.02	1408	1582	657	1437	Cdk6	protein_coding	chr5	13989
ENSMUSG00000023800.15	443.781	-0.567045	0.259587	-2.18441	0.028932	0.674714	543.224	513.003	306.742	412.155	509	570	276	448	Tiam2	protein_coding	chr17	12741
ENSMUSG00000007036.15	871.401	-0.561716	0.206809	-2.71611	0.00660545	0.303368	1032.02	1040.41	785.75	627.432	967	1156	707	682	Abhd16a	protein_coding	chr17	3220
ENSMUSG00000040033.16	1084.08	-0.560654	0.207787	-2.69822	0.00697121	0.311541	1245.47	1316.71	696.839	1077.31	1167	1463	627	1171	Stat2	protein_coding	chr10	5926
ENSMUSG00000033192.5	417.371	-0.558464	0.260676	-2.14237	0.032164	0.707717	541.089	454.503	317.856	356.035	507	505	286	387	Lpcat2	protein_coding	chr8	3388
ENSMUSG00000070327.14	9090.68	-0.556247	0.182426	-3.04917	0.00229472	0.152775	9906.1	11306.8	5200.17	9949.67	9282	12563	4679	10815	Rnf213	protein_coding	chr11	16888
ENSMUSG00000018322.10	387.93	-0.555819	0.258893	-2.1469	0.031801	0.702113	459.979	463.503	314.522	313.716	431	515	283	341	Tomm34	protein_coding	chr2	3040
ENSMUSG00000030748.9	679.379	-0.55447	0.221567	-2.50249	0.0123323	0.422822	789.756	821.705	476.785	629.272	740	913	429	684	Il4ra	protein_coding	chr7	6002
ENSMUSG00000073399.9	414.067	-0.554069	0.254206	-2.1796	0.0292869	0.677781	519.745	466.203	334.527	335.796	487	518	301	365	Trim40	protein_coding	chr17	2398
ENSMUSG00000052776.10	1422.11	-0.552484	0.194686	-2.83783	0.0045422	0.246305	1687.3	1676.71	964.683	1359.74	1581	1863	868	1478	Oas1a	protein_coding	chr5	1885
ENSMUSG00000057948.12	365.699	-0.550827	0.2724	-2.02213	0.0431632	0.822641	413.021	451.803	245.616	352.355	387	502	221	383	Unc13d	protein_coding	chr11	4679
ENSMUSG00000009545.14	1450.38	-0.55046	0.185426	-2.96861	0.00299146	0.181165	1720.39	1718.11	1039.15	1323.86	1612	1909	935	1439	Kcnq1	protein_coding	chr7	4093
ENSMUSG00000035929.11	651.676	-0.549584	0.221555	-2.48058	0.013117	0.438136	741.73	802.805	462.336	599.832	695	892	416	652	H2-Q4	protein_coding	chr17	2596
ENSMUSG00000029646.3	3611.98	-0.548544	0.177336	-3.09326	0.00197973	0.135753	4295.63	4226.42	2410.6	3515.27	4025	4696	2169	3821	Cdx2	protein_coding	chr5	2261
ENSMUSG00000075031.4	1677.39	-0.539165	0.171174	-3.14982	0.00163373	0.118951	1706.51	2268.01	1174.73	1560.3	1599	2520	1057	1696	Hist1h2bb	protein_coding	chr13	508
ENSMUSG00000033022.7	557.631	-0.530278	0.239015	-2.2186	0.026514	0.644452	699.04	618.304	414.547	498.633	655	687	373	542	Cdo1	protein_coding	chr18	1530
ENSMUSG00000027893.14	2088.73	-0.529613	0.164463	-3.22025	0.00128078	0.101834	2506.94	2429.11	1715.98	1702.9	2349	2699	1544	1851	Ahcyl1	protein_coding	chr3	6690
ENSMUSG00000046314.16	536.665	-0.525276	0.237133	-2.21511	0.0267527	0.644452	647.813	617.403	401.21	480.234	607	686	361	522	Stxbp6	protein_coding	chr12	5297
ENSMUSG00000054387.13	2219.96	-0.521366	0.16501	-3.1596	0.00157988	0.117001	2627.54	2603.71	1730.43	1918.17	2462	2893	1557	2085	Mdm4	protein_coding	chr1	14798
ENSMUSG00000024339.12	719.552	-0.520459	0.220075	-2.36491	0.0180343	0.534208	894.345	801.005	543.468	639.392	838	890	489	695	Tap2	protein_coding	chr17	3781
ENSMUSG00000062373.8	721.792	-0.518692	0.211534	-2.45205	0.0142045	0.459771	819.638	879.305	547.913	640.312	768	977	493	696	Tmem65	protein_coding	chr15	6306
ENSMUSG00000041895.15	442.511	-0.513543	0.24702	-2.07895	0.0376216	0.756092	538.955	502.203	370.091	358.795	505	558	333	390	Wipi1	protein_coding	chr11	4410
ENSMUSG00000074994.5	545.401	-0.513267	0.238698	-2.15028	0.031533	0.698732	614.729	661.504	374.537	530.833	576	735	337	577	Qser1	protein_coding	chr2	9037
ENSMUSG00000024503.2	2395.93	-0.512212	0.182926	-2.80011	0.00510856	0.263773	2958.38	2608.21	2502.84	1514.3	2772	2898	2252	1646	Spink1	protein_coding	chr18	422
ENSMUSG00000067212.8	3516.41	-0.511523	0.175378	-2.91668	0.00353775	0.200215	4122.74	4090.52	2400.59	3451.79	3863	4545	2160	3752	H2-T23	protein_coding	chr17	2889
ENSMUSG00000029177.9	501.656	-0.511145	0.249068	-2.05224	0.0401468	0.789533	574.174	597.603	338.973	495.873	538	664	305	539	Cenpa	protein_coding	chr5	5860
ENSMUSG00000009356.12	535.526	-0.510762	0.238733	-2.13947	0.0323974	0.708307	514.408	731.704	320.079	575.912	482	813	288	626	Lpo	protein_coding	chr11	3135
ENSMUSG00000030413.7	1227.34	-0.505772	0.182832	-2.76632	0.00566925	0.277259	1404.48	1476.01	984.688	1044.19	1316	1640	886	1135	Pglyrp1	protein_coding	chr7	1837
ENSMUSG00000023243.9	1565.18	0.502112	0.21256	2.36221	0.0181663	0.534208	1144.08	1435.51	2138.31	1542.82	1072	1595	1924	1677	Kcnk5	protein_coding	chr14	3404
ENSMUSG00000027663.12	506.68	0.502205	0.250886	2.00172	0.0453145	0.840166	368.197	472.503	631.267	554.753	345	525	568	603	Zmat3	protein_coding	chr3	11435
ENSMUSG00000032294.17	13809.5	0.502795	0.151689	3.31464	0.000917622	0.0809006	11793	10887.4	18964.7	13592.8	11050	12097	17064	14775	Pkm	protein_coding	chr9	5001
ENSMUSG00000001774.8	1246.51	0.502853	0.186631	2.69437	0.00705221	0.31335	905.017	1165.51	1394.79	1520.74	848	1295	1255	1653	Chordc1	protein_coding	chr9	7498
ENSMUSG00000025220.7	4090.38	0.505714	0.15713	3.21843	0.00128892	0.101857	3774.82	3011.42	4872.32	4702.98	3537	3346	4384	5112	Mgea5	protein_coding	chr19	5024
ENSMUSG00000029246.14	582.151	0.507041	0.251104	2.01925	0.0434615	0.822693	442.903	511.203	806.866	567.633	415	568	726	617	Ppat	protein_coding	chr5	4421
ENSMUSG00000021665.9	2494.53	0.51109	0.16311	3.13341	0.00172789	0.123721	2239.06	1854.91	3413.07	2471.09	2098	2061	3071	2686	Hexb	protein_coding	chr13	1906
ENSMUSG00000021213.12	2707.29	0.512847	0.15786	3.24876	0.00115911	0.0950765	2347.92	2114.11	3354.16	3012.96	2200	2349	3018	3275	Akr1c13	protein_coding	chr13	1434
ENSMUSG00000020326.7	2745.7	0.516964	0.158985	3.25165	0.00114737	0.0947132	2295.63	2217.61	3430.85	3038.72	2151	2464	3087	3303	Ccng1	protein_coding	chr11	3512
ENSMUSG00000017311.15	540.112	0.52	0.24311	2.13895	0.0324401	0.708307	395.945	493.203	672.388	598.912	371	548	605	651	Pyy	protein_coding	chr11	631
ENSMUSG00000056737.14	633.07	0.520746	0.228649	2.27749	0.0227568	0.594613	499.467	537.303	825.76	669.751	468	597	743	728	Capg	protein_coding	chr6	2529
ENSMUSG00000037960.11	425.881	0.521033	0.26177	1.99042	0.0465446	0.847217	340.449	354.602	577.921	430.554	319	394	520	468	Card19	protein_coding	chr13	1477
ENSMUSG00000021786.13	620.206	0.524571	0.220571	2.37824	0.0173955	0.521948	488.795	528.303	694.616	769.11	458	587	625	836	Oxsm	protein_coding	chr14	4125
ENSMUSG00000041372.10	1528.17	0.53044	0.197651	2.68372	0.00728086	0.31771	1295.63	1159.21	2291.68	1366.18	1214	1288	2062	1485	B4galnt3	protein_coding	chr6	3779
ENSMUSG00000032109.15	566.718	0.531553	0.233605	2.27543	0.0228799	0.596628	455.71	468.003	742.406	600.752	427	520	668	653	Nlrx1	protein_coding	chr9	5750
ENSMUSG00000035473.10	912.204	0.534206	0.200038	2.67052	0.0075734	0.326084	794.025	698.404	1068.04	1088.35	744	776	961	1183	Galm	protein_coding	chr17	2476
ENSMUSG00000013483.14	528.258	0.534918	0.235425	2.27214	0.023078	0.599381	436.5	423.902	686.836	565.793	409	471	618	615	Card14	protein_coding	chr11	4605
ENSMUSG00000089809.9	1183.38	0.542567	0.191308	2.8361	0.00456684	0.24661	963.715	955.805	1563.72	1250.26	903	1062	1407	1359	Rasgef1b	protein_coding	chr5	13805
ENSMUSG00000057880.12	6192.41	0.543153	0.152745	3.55595	0.000376611	0.0424424	5389.55	4616.13	8675.48	6088.48	5050	5129	7806	6618	Abat	protein_coding	chr16	7748
ENSMUSG00000039648.14	611.572	0.546699	0.230243	2.37445	0.0175753	0.526042	529.35	453.603	884.663	578.672	496	504	796	629	Kyat1	protein_coding	chr2	2923
ENSMUSG00000031732.12	1539.95	0.554523	0.20341	2.72613	0.00640819	0.298741	1182.5	1287.01	2191.65	1498.66	1108	1430	1972	1629	Phlpp2	protein_coding	chr8	8449
ENSMUSG00000004552.16	1114.05	0.554964	0.205066	2.70626	0.00680447	0.306201	926.362	853.205	1631.51	1045.11	868	948	1468	1136	Ctse	protein_coding	chr1	3170
ENSMUSG00000040957.15	929.825	0.555232	0.197807	2.80695	0.00500136	0.260312	726.789	779.404	1130.28	1082.83	681	866	1017	1177	Cables1	protein_coding	chr18	3839
ENSMUSG00000037390.12	27815.9	0.561032	0.141049	3.97757	6.96223e-05	0.0115352	21013.9	23992.3	33359.4	32897.8	19690	26658	30016	35759	Muc3	protein_coding	chr5	1943
ENSMUSG00000028211.11	1993.9	0.563737	0.168865	3.33839	0.000842642	0.0769059	1705.45	1516.51	2356.14	2397.49	1598	1685	2120	2606	Trp53inp1	protein_coding	chr4	6475
ENSMUSG00000042524.14	1388.27	0.568845	0.188543	3.01706	0.00255243	0.164574	1212.38	995.406	2052.73	1292.58	1136	1106	1847	1405	Sun2	protein_coding	chr15	5420
ENSMUSG00000040370.13	444.751	0.572334	0.247281	2.31451	0.02064	0.569703	392.743	324.002	559.027	503.233	368	360	503	547	Etfrf1	protein_coding	chr6	2682
ENSMUSG00000028494.12	2005.02	0.576014	0.195881	2.94063	0.00327541	0.192078	1562.44	1613.71	2934.06	1909.89	1464	1793	2640	2076	Plin2	protein_coding	chr4	3512
ENSMUSG00000034203.8	426.041	0.576136	0.271433	2.12257	0.0337895	0.723769	297.759	387.002	561.25	458.154	279	430	505	498	Chchd4	protein_coding	chr6	5192
ENSMUSG00000094806.2	427.451	0.579639	0.252038	2.29981	0.0214591	0.578945	356.457	326.702	571.252	455.394	334	363	514	495	Cyp2d10	protein_coding	chr15	1648
ENSMUSG00000000394.15	618.27	0.581016	0.221095	2.6279	0.00859141	0.351245	485.593	504.903	707.953	774.63	455	561	637	842	Gcg	protein_coding	chr2	1494
ENSMUSG00000047040.9	4721.16	0.583775	0.158431	3.68471	0.000228959	0.0277319	3610.46	3938.42	6082.61	5253.13	3383	4376	5473	5710	Prr15l	protein_coding	chr11	3923
ENSMUSG00000021773.11	312.919	0.590584	0.293618	2.0114	0.0442827	0.829341	226.254	272.702	412.324	340.396	212	303	371	370	Comtd1	protein_coding	chr14	2470
ENSMUSG00000025969.15	1307.54	0.591563	0.18154	3.25859	0.00111967	0.0933604	1055.5	1030.51	1520.38	1623.78	989	1145	1368	1765	Nrp2	protein_coding	chr1	11842
ENSMUSG00000000056.7	958.82	0.593234	0.210243	2.82166	0.00477765	0.252728	722.52	800.105	1296.99	1015.67	677	889	1167	1104	Narf	protein_coding	chr11	4806
ENSMUSG00000066090.5	427.191	0.598127	0.264658	2.26	0.0238211	0.610121	303.095	377.102	555.693	472.874	284	419	500	514	Insl5	protein_coding	chr4	724
ENSMUSG00000015656.17	26157.1	0.598286	0.155196	3.85503	0.000115714	0.016548	18477.1	23288.5	32678.1	30184.8	17313	25876	29403	32810	Hspa8	protein_coding	chr9	4301
ENSMUSG00000021360.16	320.065	0.601431	0.288252	2.08647	0.0369358	0.753839	268.944	232.201	480.119	298.996	252	258	432	325	Gcnt2	protein_coding	chr13	7051
ENSMUSG00000022546.5	816.702	0.611319	0.203436	3.00497	0.00265607	0.168739	608.325	683.104	909.114	1066.27	570	759	818	1159	Gpt	protein_coding	chr15	2941
ENSMUSG00000029381.16	5450.41	0.612986	0.153162	4.0022	6.2756e-05	0.0105626	4373.54	4213.82	7342.93	5871.36	4098	4682	6607	6382	Shroom3	protein_coding	chr5	13247
ENSMUSG00000024222.17	2276.18	0.620212	0.162509	3.81648	0.000135369	0.0188643	1749.2	1837.81	2626.2	2891.52	1639	2042	2363	3143	Fkbp5	protein_coding	chr17	9468
ENSMUSG00000032050.17	547.91	0.62338	0.26389	2.36228	0.018163	0.534208	425.828	413.102	877.995	474.714	399	459	790	516	Rdx	protein_coding	chr9	4639
ENSMUSG00000000805.18	6287.65	0.623588	0.161802	3.85402	0.000116193	0.016548	4971.19	4846.53	8923.32	6409.56	4658	5385	8029	6967	Car4	protein_coding	chr11	1966
ENSMUSG00000045312.12	1660.89	0.624414	0.18164	3.43764	0.000586802	0.0598815	1437.57	1183.51	1951.59	2070.89	1347	1315	1756	2251	Lhfpl2	protein_coding	chr13	8415
ENSMUSG00000042041.6	374.067	0.626024	0.28229	2.21767	0.0265776	0.644452	231.59	364.502	451.223	448.954	217	405	406	488	2010003K11Rik	protein_coding	chr19	1165
ENSMUSG00000030865.4	2910.37	0.629579	0.156419	4.02495	5.69881e-05	0.00998063	2302.03	2268.01	3597.56	3473.87	2157	2520	3237	3776	Chp2	protein_coding	chr7	1603
ENSMUSG00000021775.11	1155.27	0.630718	0.186332	3.38492	0.00071199	0.0671073	1242.26	565.203	1951.59	862.029	1164	628	1756	937	Nr1d2	protein_coding	chr14	5409
ENSMUSG00000022562.15	724.847	0.636481	0.214076	2.97315	0.00294761	0.181165	611.527	525.603	873.549	888.708	573	584	786	966	Oplah	protein_coding	chr15	5837
ENSMUSG00000020272.8	890.28	0.637855	0.200424	3.18252	0.00145998	0.110906	579.51	819.905	954.68	1207.02	543	911	859	1312	Stk10	protein_coding	chr11	5187
ENSMUSG00000045930.3	449.199	0.640627	0.246858	2.59513	0.00945558	0.373607	374.6	328.502	554.582	539.113	351	365	499	586	Clec14a	protein_coding	chr12	4571
ENSMUSG00000068196.5	527.714	0.643691	0.23605	2.72692	0.00639283	0.298741	465.315	351.002	791.307	503.233	436	390	712	547	Col8a1	protein_coding	chr16	7833
ENSMUSG00000021306.11	521.765	0.645358	0.258925	2.49245	0.0126865	0.429288	418.357	374.402	837.985	456.314	392	416	754	496	Gpr137b	protein_coding	chr13	5026
ENSMUSG00000034320.14	25695.7	0.649826	0.155443	4.18047	2.90914e-05	0.00618072	21064.1	18394.3	38642.9	24681.4	19737	20438	34770	26828	Slc26a2	protein_coding	chr18	12370
ENSMUSG00000034472.13	377.646	0.650168	0.273248	2.37941	0.0173406	0.521948	282.818	301.502	527.908	398.355	265	335	475	433	Rasd2	protein_coding	chr8	3176
ENSMUSG00000031478.16	212.81	0.664065	0.329002	2.01842	0.0435473	0.822702	155.817	173.701	262.287	259.437	146	193	236	282	Nek3	protein_coding	chr8	2153
ENSMUSG00000038756.13	660.798	0.671422	0.221408	3.0325	0.00242534	0.157952	538.955	473.403	949.123	681.711	505	526	854	741	Ttll6	protein_coding	chr11	3857
ENSMUSG00000021950.15	540.078	0.673563	0.28548	2.3594	0.0183043	0.534208	429.029	349.202	1005.8	376.275	402	388	905	409	Anxa8	protein_coding	chr14	1880
ENSMUSG00000001225.12	17154.1	0.694962	0.16209	4.2875	1.80698e-05	0.00403767	13583.8	12195.1	26385.4	16452.1	12728	13550	23741	17883	Slc26a3	protein_coding	chr12	6369
ENSMUSG00000050777.7	333.52	0.703469	0.285156	2.46696	0.0136266	0.450512	263.608	236.701	509.015	324.756	247	263	458	353	Tmem37	protein_coding	chr1	1311
ENSMUSG00000073436.11	348.583	0.703565	0.274106	2.56676	0.0102654	0.383399	261.473	267.302	474.562	390.995	245	297	427	425	Eme2	protein_coding	chr17	6000
ENSMUSG00000029762.6	1176.53	0.704513	0.190808	3.69227	0.000222265	0.0271751	887.941	896.405	1308.1	1613.66	832	996	1177	1754	Akr1b8	protein_coding	chr6	1499
ENSMUSG00000032122.15	3860.53	0.710774	0.170271	4.17437	2.98811e-05	0.00624611	3067.24	2701.82	5931.47	3741.59	2874	3002	5337	4067	Slc37a2	protein_coding	chr9	6643
ENSMUSG00000068086.6	175.578	0.711046	0.361644	1.96615	0.049281	0.86721	165.422	104.401	235.614	196.877	155	116	212	214	Cyp2d9	protein_coding	chr15	2658
ENSMUSG00000047501.3	555.354	0.712752	0.231105	3.0841	0.00204168	0.139264	510.139	337.502	781.304	592.472	478	375	703	644	Cldn4	protein_coding	chr5	1816
ENSMUSG00000009621.18	457.778	0.718897	0.24644	2.91713	0.00353266	0.200215	344.718	346.502	529.02	610.872	323	385	476	664	Vav2	protein_coding	chr2	6915
ENSMUSG00000029657.15	1120.5	0.728814	0.235085	3.10021	0.00193384	0.134024	400.214	1430.11	925.784	1725.9	375	1589	833	1876	Hsph1	protein_coding	chr5	7266
ENSMUSG00000026880.11	1299.35	0.730112	0.183914	3.96985	7.19181e-05	0.0116507	1020.28	927.005	1820.45	1429.66	956	1030	1638	1554	Stom	protein_coding	chr2	2827
ENSMUSG00000057614.6	339.483	0.730265	0.288684	2.52963	0.0114183	0.406541	226.254	284.402	464.559	382.715	212	316	418	416	Gnai1	protein_coding	chr5	3135
ENSMUSG00000068299.11	366.766	0.735139	0.271038	2.71232	0.00668149	0.304048	264.675	284.402	501.235	416.755	248	316	451	453	Nat8f4	protein_coding	chr6	3223
ENSMUSG00000026958.13	351.022	0.739109	0.270415	2.73324	0.00627138	0.296109	262.54	262.801	465.671	413.075	246	292	419	449	Dpp7	protein_coding	chr2	3337
ENSMUSG00000024421.16	1414.79	0.747071	0.179916	4.15234	3.29099e-05	0.00656173	1072.57	1035.91	1920.47	1630.22	1005	1151	1728	1772	Lama3	protein_coding	chr18	10745
ENSMUSG00000045725.5	700.617	0.756676	0.217418	3.48028	0.000500888	0.0527764	580.577	450.903	1079.16	691.831	544	501	971	752	Prr15	protein_coding	chr6	3157
ENSMUSG00000074006.3	174.041	0.7578	0.358267	2.11518	0.0344148	0.727594	119.531	139.501	214.497	222.637	112	155	193	242	Omp	protein_coding	chr7	2144
ENSMUSG00000060224.3	216.726	0.759141	0.346701	2.18961	0.0285525	0.673985	146.212	172.801	323.413	224.477	137	192	291	244	Pyroxd2	protein_coding	chr19	3119
ENSMUSG00000026418.16	806.872	0.763192	0.224521	3.3992	0.000675829	0.064939	617.93	555.303	1286.98	767.27	579	617	1158	834	Tnni1	protein_coding	chr1	3600
ENSMUSG00000074622.4	232.137	0.773557	0.319247	2.42307	0.01539	0.487664	143.01	201.601	265.621	318.316	134	224	239	346	Mafb	protein_coding	chr2	3363
ENSMUSG00000049134.15	370.056	0.77378	0.29553	2.61827	0.00883758	0.356807	272.146	256.501	626.822	324.756	255	285	564	353	Nrap	protein_coding	chr19	5507
ENSMUSG00000002228.7	316.16	0.781125	0.283551	2.75479	0.00587295	0.281901	255.07	211.501	397.876	400.195	239	235	358	435	Ppm1j	protein_coding	chr3	1814
ENSMUSG00000037362.8	3753.12	0.782996	0.163157	4.79902	1.59445e-06	0.000460754	2201.71	3379.52	4297.73	5133.53	2063	3755	3867	5580	Nov	protein_coding	chr15	2869
ENSMUSG00000020889.11	655.121	0.784748	0.243659	3.22067	0.00127889	0.101834	589.115	317.702	1285.87	427.794	552	353	1157	465	Nr1d1	protein_coding	chr11	3077
ENSMUSG00000030762.11	7015.44	0.784975	0.146617	5.35392	8.60702e-08	3.48584e-05	5706.52	4543.23	10439.2	7372.78	5347	5048	9393	8014	Aqp8	protein_coding	chr7	1581
ENSMUSG00000044468.14	241.911	0.785756	0.336199	2.33718	0.01943	0.549794	172.892	173.701	395.653	225.397	162	193	356	245	Tent5c	protein_coding	chr3	6097
ENSMUSG00000027068.6	411.714	0.787115	0.269834	2.91703	0.00353383	0.200215	319.104	282.602	449	596.152	299	314	404	648	Dhrs9	protein_coding	chr2	4281
ENSMUSG00000040987.15	153.799	0.797648	0.387917	2.05623	0.0397601	0.785716	136.606	90.9005	194.493	193.197	128	101	175	210	Mill2	protein_coding	chr7	4546
ENSMUSG00000025262.8	256.952	0.813159	0.308564	2.6353	0.00840636	0.348892	199.573	173.701	312.299	342.236	187	193	281	372	Fam120c	protein_coding	chrX	5823
ENSMUSG00000060487.7	229.257	0.819313	0.325655	2.51589	0.0118731	0.415878	145.144	181.801	221.166	368.915	136	202	199	401	Samd5	protein_coding	chr10	6922
ENSMUSG00000004038.9	450.776	0.819941	0.246204	3.33034	0.000867409	0.0780668	345.785	306.902	590.146	560.273	324	341	531	609	Gstm3	protein_coding	chr3	1311
ENSMUSG00000036123.8	5234.46	0.823663	0.152675	5.39489	6.85641e-08	2.86642e-05	4111	3465.92	6677.21	6683.71	3852	3851	6008	7265	Slc9a3	protein_coding	chr13	5504
ENSMUSG00000030873.9	187.096	0.841652	0.367662	2.2892	0.0220677	0.584862	139.808	118.801	327.859	161.918	131	132	295	176	Scnn1b	protein_coding	chr7	2633
ENSMUSG00000072812.4	251.005	0.846343	0.367783	2.3012	0.0213803	0.578945	175.027	154.801	501.235	172.958	164	172	451	188	Ahnak2	protein_coding	chr12	14163
ENSMUSG00000038751.5	394.261	0.858539	0.258081	3.32663	0.000879037	0.0785677	256.137	304.202	460.114	556.593	240	338	414	605	Ptk6	protein_coding	chr2	3689
ENSMUSG00000028862.6	170.804	0.859945	0.374129	2.29853	0.0215317	0.578945	122.732	115.201	277.846	167.438	115	128	250	182	Map3k6	protein_coding	chr4	4604
ENSMUSG00000023087.15	1144.54	0.867398	0.197739	4.38657	1.15151e-05	0.00281577	744.932	876.605	1569.28	1387.34	698	974	1412	1508	Noct	protein_coding	chr3	10658
ENSMUSG00000055373.8	705.522	0.871725	0.246596	3.53504	0.000407714	0.0451621	495.198	473.403	1200.3	653.191	464	526	1080	710	Fut9	protein_coding	chr4	13824
ENSMUSG00000078566.8	197.114	0.874902	0.379474	2.30556	0.021135	0.578377	122.732	148.501	332.304	184.918	115	165	299	201	Bnip3	protein_coding	chr7	2265
ENSMUSG00000074882.3	1193.64	0.884767	0.229414	3.85664	0.000114957	0.016548	903.95	679.504	2273.9	917.228	847	755	2046	997	Cyp2c68	protein_coding	chr19	1724
ENSMUSG00000033849.3	201.667	0.886735	0.364532	2.43253	0.0149936	0.478615	120.598	161.101	307.854	217.117	113	179	277	236	B3galt2	protein_coding	chr1	9288
ENSMUSG00000035431.4	312.434	0.890211	0.282236	3.15414	0.00160971	0.118534	236.927	199.801	457.891	355.115	222	222	412	386	Sstr1	protein_coding	chr12	2046
ENSMUSG00000020261.15	1681.87	0.895406	0.218466	4.09861	4.15635e-05	0.00816156	1214.52	1030.51	3078.54	1403.9	1138	1145	2770	1526	Slc36a1	protein_coding	chr11	5626
ENSMUSG00000041073.10	106.169	0.897856	0.445872	2.01371	0.0440402	0.827189	65.1015	82.8005	116.696	160.078	61	92	105	174	Nacad	protein_coding	chr11	4892
ENSMUSG00000037254.18	183.437	0.92549	0.361224	2.5621	0.0104042	0.384256	145.144	99.9006	332.304	156.398	136	111	299	170	Itih2	protein_coding	chr2	3315
ENSMUSG00000041482.16	124.484	0.927968	0.42424	2.18737	0.0287157	0.674714	87.5135	81.0005	203.384	126.038	82	90	183	137	Piezo2	protein_coding	chr18	14566
ENSMUSG00000045331.3	195.027	0.928301	0.373339	2.48649	0.0129012	0.433158	118.463	145.801	318.968	196.877	111	162	287	214	2310079G19Rik	protein_coding	chr16	881
ENSMUSG00000025557.10	2112.21	0.937055	0.435274	2.15279	0.0313351	0.697306	1503.74	1255.51	3928.75	1760.86	1409	1395	3535	1914	Slc15a1	protein_coding	chr14	4885
ENSMUSG00000028957.12	528.56	0.944513	0.278947	3.38599	0.000709209	0.0671073	392.743	278.102	1068.04	375.355	368	309	961	408	Per3	protein_coding	chr4	9608
ENSMUSG00000029188.14	672.256	0.947666	0.222989	4.24982	2.13938e-05	0.00462106	366.062	561.603	793.529	967.827	343	624	714	1052	Slc34a2	protein_coding	chr5	5013
ENSMUSG00000039347.7	345.682	0.956818	0.280891	3.40636	0.000658344	0.0646375	243.33	220.501	554.582	364.315	228	245	499	396	Atp6v0e2	protein_coding	chr6	2381
ENSMUSG00000022358.7	1313	0.987767	0.196382	5.02983	4.9092e-07	0.000155179	961.581	801.005	1612.62	1876.78	901	890	1451	2040	Fbxo32	protein_coding	chr15	6976
ENSMUSG00000070390.12	619.553	0.989074	0.228003	4.338	1.43787e-05	0.0034509	395.945	432.902	885.774	763.59	371	481	797	830	Nlrp1b	protein_coding	chr11	6305
ENSMUSG00000056515.9	223.747	0.996337	0.362398	2.74929	0.00597242	0.284961	143.01	142.201	415.658	194.117	134	158	374	211	Rab31	protein_coding	chr17	3813
ENSMUSG00000038569.13	90.2058	1.00013	0.48124	2.07823	0.0376879	0.756092	52.2946	68.4004	112.25	127.878	49	76	101	139	Rad9b	protein_coding	chr5	4322
ENSMUSG00000073530.11	174.666	1.00608	0.358316	2.80781	0.00498793	0.260312	114.194	117.901	241.171	225.397	107	131	217	245	Pappa2	protein_coding	chr1	10294
ENSMUSG00000040505.13	215.978	1.00809	0.383012	2.63202	0.00848799	0.34922	134.472	133.201	427.884	168.358	126	148	385	183	Abcg5	protein_coding	chr17	2712
ENSMUSG00000064307.13	145.652	1.00986	0.391241	2.58116	0.00984679	0.375337	104.589	89.1005	185.601	203.317	98	99	167	221	Lrrc51	protein_coding	chr7	1210
ENSMUSG00000074195.3	275.014	1.02537	0.306554	3.34485	0.00082328	0.0756717	182.498	175.501	441.22	300.836	171	195	397	327	Clca4b	protein_coding	chr3	2997
ENSMUSG00000038776.13	306.877	1.02709	0.284291	3.6128	0.000302912	0.0349301	229.456	175.501	454.557	367.995	215	195	409	400	Ephx1	protein_coding	chr1	1950
ENSMUSG00000020838.12	269.031	1.02885	0.301825	3.40874	0.000652626	0.0645651	205.977	144.001	455.668	270.476	193	160	410	294	Slc6a4	protein_coding	chr11	4531
ENSMUSG00000032454.9	147.189	1.03148	0.420047	2.45562	0.0140641	0.45912	94.9841	88.2005	282.292	123.278	89	98	254	134	Rbp2	protein_coding	chr9	962
ENSMUSG00000002900.16	111.941	1.03425	0.437615	2.36338	0.0181092	0.534208	62.967	82.8005	118.918	183.078	59	92	107	199	Lamb1	protein_coding	chr12	9917
ENSMUSG00000043639.14	74.7171	1.03481	0.525114	1.97064	0.0487653	0.864566	61.8998	36.9002	120.03	80.0389	58	41	108	87	Rbm20	protein_coding	chr19	6790
ENSMUSG00000096852.2	505.54	1.04245	0.242953	4.29074	1.78079e-05	0.00403767	350.054	304.202	811.312	556.593	328	338	730	605	Cyp2d12	protein_coding	chr15	3880
ENSMUSG00000042498.16	163.625	1.09209	0.371977	2.93592	0.00332564	0.192412	106.724	100.801	255.619	191.357	100	112	230	208	D330045A20Rik	protein_coding	chrX	3740
ENSMUSG00000036437.6	103.034	1.09766	0.467909	2.34587	0.0189826	0.542912	66.1687	61.2003	184.49	100.279	62	68	166	109	Npy1r	protein_coding	chr8	3454
ENSMUSG00000052026.7	260.998	1.10044	0.344387	3.19536	0.00139656	0.107097	148.346	174.601	463.448	257.597	139	194	417	280	Slc6a7	protein_coding	chr18	3342
ENSMUSG00000015647.9	794.239	1.11685	0.210643	5.30207	1.14495e-07	4.3643e-05	581.644	406.802	1388.12	800.389	545	452	1249	870	Lama5	protein_coding	chr2	11388
ENSMUSG00000001270.9	312.413	1.12618	0.296418	3.7993	0.000145104	0.0197953	155.817	242.101	415.658	436.074	146	269	374	474	Ckb	protein_coding	chr12	2895
ENSMUSG00000000983.13	152.831	1.14062	0.45402	2.51227	0.0119956	0.416792	72.5721	111.601	290.072	137.078	68	124	261	149	Wfdc18	protein_coding	chr11	1220
ENSMUSG00000037053.6	82.4103	1.16023	0.50885	2.28011	0.0226012	0.594142	62.967	40.5002	116.696	109.479	59	45	105	119	Azgp1	protein_coding	chr5	1610
ENSMUSG00000049551.2	92.1386	1.16591	0.557785	2.09024	0.0365959	0.749261	41.6223	65.7004	186.713	74.519	39	73	168	81	Fzd9	protein_coding	chr5	2293
ENSMUSG00000055980.2	270.774	1.16761	0.300151	3.89008	0.000100211	0.0151857	170.758	162.901	361.2	388.235	160	181	325	422	Irs1	protein_coding	chr1	9144
ENSMUSG00000027870.8	12632.9	1.20698	0.151909	7.94545	1.93489e-15	2.27966e-12	8473.86	6857.14	17260.9	17939.8	7940	7619	15531	19500	Hao2	protein_coding	chr3	2049
ENSMUSG00000004328.15	96.6094	1.21176	0.478686	2.53143	0.0113597	0.405569	53.3619	62.1004	157.817	113.159	50	69	142	123	Hif3a	protein_coding	chr7	6710
ENSMUSG00000028464.16	98.2033	1.21648	0.472519	2.57446	0.0100396	0.378235	54.4291	63.0004	156.705	118.678	51	70	141	129	Tpm2	protein_coding	chr4	2909
ENSMUSG00000026764.15	72.5142	1.22184	0.541045	2.25829	0.0239276	0.610436	55.4963	33.3002	105.582	95.6787	52	37	95	104	Kif5c	protein_coding	chr2	7142
ENSMUSG00000095115.2	263.534	1.22235	0.33311	3.66952	0.00024301	0.0288937	156.884	146.701	501.235	249.317	147	163	451	271	Itpripl2	protein_coding	chr7	6865
ENSMUSG00000022229.3	6701.41	1.2258	0.508576	2.41027	0.0159408	0.496003	3565.64	4274.12	12043	6922.91	3341	4749	10836	7525	Atp12a	protein_coding	chr14	4016
ENSMUSG00000032724.5	234.73	1.25525	0.360228	3.4846	0.000492877	0.0523581	120.598	149.401	427.884	241.037	113	166	385	262	Abtb2	protein_coding	chr2	6032
ENSMUSG00000068744.12	91.8373	1.28612	0.483963	2.65748	0.00787265	0.33343	67.2359	41.4002	140.035	118.678	63	46	126	129	Psrc1	protein_coding	chr3	3364
ENSMUSG00000054999.2	604.289	1.28849	0.244526	5.26935	1.36909e-07	5.06955e-05	353.256	340.202	692.393	1031.31	331	378	623	1121	Naaladl1	protein_coding	chr19	2491
ENSMUSG00000035878.13	236.142	1.30792	0.324374	4.03214	5.52723e-05	0.00998063	161.153	113.401	343.418	326.596	151	126	309	355	Hykk	protein_coding	chr9	8936
ENSMUSG00000025161.16	103.081	1.31169	0.496244	2.64324	0.0082118	0.344417	49.0929	65.7004	194.493	103.039	46	73	175	112	Slc16a3	protein_coding	chr11	5318
ENSMUSG00000029074.14	628.144	1.31182	0.221096	5.93328	2.96936e-09	1.42529e-06	359.659	361.802	896.888	894.228	337	402	807	972	Ttll10	protein_coding	chr4	3985
ENSMUSG00000009614.16	221.359	1.32433	0.325487	4.06876	4.72631e-05	0.00887725	113.127	139.501	282.292	350.515	106	155	254	381	Sardh	protein_coding	chr2	5432
ENSMUSG00000063522.5	1942.77	1.33356	0.201088	6.63175	3.31726e-11	2.14958e-08	924.227	1298.71	2995.18	2552.97	866	1443	2695	2775	2010109I03Rik	protein_coding	chr15	3302
ENSMUSG00000066687.5	87.468	1.35163	0.533278	2.53457	0.0112585	0.404184	43.7567	48.6003	181.156	76.359	41	54	163	83	Zbtb16	protein_coding	chr9	5283
ENSMUSG00000068547.6	4158.77	1.35361	0.153834	8.79915	1.37862e-18	1.78669e-15	2150.48	2504.71	5137.94	6841.95	2015	2783	4623	7437	Clca4a	protein_coding	chr3	3004
ENSMUSG00000030882.19	43.8105	1.35733	0.681176	1.99263	0.0463022	0.846178	23.4792	25.2001	51.1237	75.439	22	28	46	82	Dnhd1	protein_coding	chr7	15081
ENSMUSG00000023176.9	60.0647	1.36467	0.583963	2.33692	0.0194435	0.549794	40.555	27.0002	100.025	72.679	38	30	90	79	Cpn2	protein_coding	chr16	4550
ENSMUSG00000053113.3	186.453	1.37459	0.428072	3.21113	0.00132216	0.103224	116.329	81.9005	166.708	380.875	109	91	150	414	Socs3	protein_coding	chr11	2891
ENSMUSG00000032006.15	64.5205	1.46498	0.58033	2.52439	0.01159	0.409218	39.4878	25.2001	140.035	53.3593	37	28	126	58	Pdgfd	protein_coding	chr9	3154
ENSMUSG00000027375.14	595.992	1.51932	0.225514	6.73713	1.61542e-11	1.16311e-08	315.902	300.602	909.114	858.349	296	334	818	933	Mal	protein_coding	chr2	2778
ENSMUSG00000033854.10	62.8074	1.52956	0.613028	2.49509	0.0125924	0.427357	26.6809	35.1002	127.809	61.6392	25	39	115	67	Kcnk10	protein_coding	chr12	8774
ENSMUSG00000092008.1	104.055	1.53033	0.474649	3.22414	0.00126352	0.10171	57.6308	43.2002	223.389	91.9988	54	48	201	100	Cyp2c69	protein_coding	chr19	1770
ENSMUSG00000117286.1	41.0914	1.60483	0.706859	2.27037	0.0231852	0.600961	18.143	22.5001	66.6831	57.0393	17	25	60	62	Gm1043	protein_coding	chr5	13507
ENSMUSG00000024620.11	246.297	1.60779	0.316391	5.08165	3.74175e-07	0.000127613	118.463	124.201	401.21	341.316	111	138	361	371	Pdgfrb	protein_coding	chr18	5478
ENSMUSG00000031098.18	91.3839	1.64456	0.555531	2.96034	0.00307303	0.184382	39.4878	36.0002	231.168	58.8792	37	40	208	64	Syt8	protein_coding	chr7	1894
ENSMUSG00000040856.17	123.84	1.68002	0.447204	3.75672	0.000172152	0.021987	45.8912	72.9004	210.052	166.518	43	81	189	181	Dlk1	protein_coding	chr12	5657
ENSMUSG00000021565.16	40.8629	1.76334	0.708446	2.48903	0.0128092	0.432311	18.143	18.9001	55.5693	70.8391	17	21	50	77	Slc6a19	protein_coding	chr13	5006
ENSMUSG00000101031.1	581.654	1.77421	0.231987	7.64789	2.04298e-14	2.0367e-11	262.54	261.901	982.465	819.709	246	291	884	891	Ms4a12	protein_coding	chr19	792
ENSMUSG00000037902.18	37.3018	1.90217	0.748236	2.5422	0.0110156	0.401018	12.8068	18.0001	41.1213	77.279	12	20	37	84	Sirpa	protein_coding	chr2	4911
ENSMUSG00000000216.8	121.439	2.03491	0.513898	3.95974	7.50303e-05	0.0120048	48.0257	25.2001	360.089	52.4393	45	28	324	57	Scnn1g	protein_coding	chr7	2991
ENSMUSG00000031842.14	27.4122	2.04599	0.884129	2.31413	0.0206605	0.569703	7.47066	12.6001	23.3391	66.2391	7	14	21	72	Pde4c	protein_coding	chr8	5592
ENSMUSG00000041801.5	71.1268	2.15903	0.629606	3.42918	0.000605417	0.0608233	18.143	29.7002	172.265	64.3992	17	33	155	70	Phlda3	protein_coding	chr1	1559
ENSMUSG00000017002.14	42.7975	2.19371	0.724471	3.02802	0.00246161	0.159512	18.143	9.90006	110.027	33.1196	17	11	99	36	Slpi	protein_coding	chr2	1180
ENSMUSG00000081984.3	19.6836	2.30969	1.04939	2.20097	0.0277381	NA	7.47066	4.50003	51.1237	15.6398	7	5	46	17	Dnajb3	protein_coding	chr1	1051
ENSMUSG00000038068.15	14.4531	2.36583	1.20677	1.96046	0.0499424	NA	7.47066	2.70002	25.5619	22.0797	7	3	23	24	Rnf144b	protein_coding	chr13	4936
ENSMUSG00000037386.16	81.0679	2.38664	0.528267	4.51787	6.24639e-06	0.00155679	28.8154	23.4001	126.698	145.358	27	26	114	158	Rims2	protein_coding	chr15	10389
ENSMUSG00000024524.16	248.133	2.54794	0.334344	7.62071	2.52274e-14	2.33534e-11	84.3117	54.0003	595.703	258.517	79	60	536	281	Gnal	protein_coding	chr18	5761
ENSMUSG00000028402.18	50.2598	2.65018	0.724199	3.65946	0.000252749	0.0297784	16.0086	9.90006	50.0124	125.118	15	11	45	136	Mpdz	protein_coding	chr4	12437
ENSMUSG00000034457.10	144.806	2.73071	0.41554	6.57148	4.9816e-11	3.07436e-08	36.2861	38.7002	288.96	215.277	34	43	260	234	Eda2r	protein_coding	chrX	5891
ENSMUSG00000038550.10	30.7467	2.90121	0.929234	3.12215	0.00179535	0.127146	9.60514	2.70002	97.802	12.8798	9	3	88	14	Ciart	protein_coding	chr3	2261
ENSMUSG00000048458.8	22.0552	3.12452	1.02386	3.0517	0.0022755	NA	4.26895	4.50003	50.0124	29.4396	4	5	45	32	Inka2	protein_coding	chr3	4781
ENSMUSG00000022376.8	8.9348	4.07578	1.78598	2.28209	0.0224839	NA	0	2.70002	15.5594	17.4798	0	3	14	19	Adcy8	protein_coding	chr15	8152
ENSMUSG00000058579.5	3.9763	5.2485	2.67446	1.96245	0.0497098	NA	0	0	12.2252	3.67995	0	0	11	4	Cela2a	protein_coding	chr4	1723

## Sheet: Colon Bkg List WT>10ProtCod
	pvalue	genename	Minus LOG10(pValue)
	0.480847	Ang4
	0.539268	Mptx1
	0.594716	Cd74
	0.93406	Gsdmc2
	0.755491	Reg4
	0.751748	Clca1
	0.279516	S100g
	0.945181	H2-Aa
	0.658626	H2-Ab1
	0.668282	Clca4a
	0.234612	Hao2
	0.802597	Fn1
	0.802269	Ms4a12
	0.359478	Gnal
	0.392318	Ddx5
	0.709317	Slc15a2
	0.746205	Mal
	0.802035	Cd177
	0.274306	2010109I03Rik
	0.61356	Eda2r
	0.427802	Iigp1
	0.913499	Gsdmc4
	0.593894	H2-Eb1
	0.60249	Gadd45g
	0.992803	Fam221a
	0.905348	Ttll10
	0.740277	Spta1
	0.847715	Gsdmc3
	0.921917	Slc9a3
	0.689222	Aqp8
	0.720657	Clca3b
	0.783584	Lama5
	0.535944	Naaladl1
	0.604489	Nox1
	0.893943	Cracr2a
	0.474626	Pdgfrb
	0.992808	Rasa4
	0.818855	Fbxo32
	0.923902	Mx1
	0.844905	C3
	0.425171	Nov
	0.723155	Tap1
	0.605424	Psmb8
	0.903084	Ceacam10
	0.896368	H2-DMb1
	0.871751	Fcgbp
	0.339076	Slc4a7
	0.79902	Cldn8
	0.867061	Rims2
	0.846293	Noct
	0.727437	Nlrp1b
	0.602061	Ptprc
	0.951553	Slfn4
	0.827447	Cyp2d12
	0.700133	Slc26a3
	0.787476	Nlrc5
	0.250035	Slc34a2
	0.879213	Slc26a2
	0.861484	Slc37a2
	0.944356	Mt1
	0.648942	Lama3
	0.885775	Slc36a1
	0.783347	E330009J07Rik
	0.651294	Scin
	0.672925	Sardh
	0.397175	Fhl2
	0.37954	Hykk
	0.234691	Myrip
	0.769815	Areg
	0.839001	Chp2
	0.766586	Slc1a1
	0.802597	Dclk1
	0.933715	Shroom3
	0.930399	Muc3
	0.792027	Pla2g4c
	0.716286	Stom
	0.414613	Scnn1g
	0.802269	Tnip3
	0.727109	Ntrk2
	0.661093	Gbp2
	0.483576	Irs1
	0.903084	Hspa1a
	0.815786	B2m
	0.986243	Cyp2c68
	0.195307	Hspa8
	0.992546	Car4
	0.702557	Miga1
	0.785498	Fkbp5
	0.615759	Xlr3b
	0.436008	Ckb
	0.788597	Capn9
	0.63421	Noxa1
	0.698228	Tnfsf10
	0.882398	Mptx2
	0.647511	Gbp3
	0.270159	Dlk1
	0.816317	Fer1l6
	0.992546	Nos2
	0.802269	Ifitm3
	0.788597	Akr1b8
	0.335007	Prr15l
	0.616975	Pck1
	0.61567	Itpripl2
	0.802597	Odf2l
	0.733884	Ephx1
	0.667773	Trpm5
	0.373036	Flrt3
	0.0101404	Abat
	0.915934	Clca2
	0.665303	Fut9
	0.881385	Zbp1
	0.847399	Ppp1r9a
	0.896512	Ciita
	0.71326	Abtb2
	0.748466	Prr15
	0.788597	Ccl5
	0.556149	Fads1
	0.619428	Rbm3
	0.802597	Lhfpl2
	0.700133	Nr4a1
	0.788274	Phlda3
	0.747663	Slc6a4
	0.588586	Atp6v0e2
	0.649445	Sprr2a3
	0.802597	Tnni1
	0.805098	Per3
	0.674448	Nr1d2
	0.734777	Zc3h12a
	0.992803	Fbn1
	0.306749	H2-Q7
	0.802227	Clca4b
	0.788274	Trp53inp1
	0.581417	Pitpnm3
	0.788274	Gstm3
	0.643498	Ptk6
	0.788597	Tox3
	0.992673	Pkm
	0.788597	Ablim2
	0.802597	Igtp
	0.992546	Fndc5
	0.802227	Pnliprp2
	0.859651	Gatm
	0.782206	Irgm1
	0.860563	Nrp2
	0.788597	Retnlb
	0.788597	Ccng1
	0.802597	Akr1c13
	0.697442	Itga1
	0.603862	Aldh2
	0.862229	Cyp2c69
	0.788274	Nr1d1
	0.802269	Ahcyl1
	0.235491	Mgea5
	0.71326	Me1
	0.906479	Socs3
	0.833655	Clca3a2
	0.788597	Dnah8
	0.69128	Slc6a7
	0.84485	Stk10
	0.788274	Pik3r5
	0.992546	Rgs1
	0.106013	Gfi1
	0.802597	Myadm
	0.500042	Mdm4
	0.69968	Sstr1
	0.611106	Cd55
	0.802227	Hist1h2bb
	0.357296	Ccnd1
	0.763277	Nptx1
	0.705779	Hexb
	0.666534	Cbx6
	0.788597	Pxdn
	0.170492	mt-Nd4
	0.917534	Hsph1
	0.713717	Hist1h3b
	0.802227	Cdx2
	0.939967	Cldn4
	0.535642	Steap4
	0.879091	Hck
	0.977378	Ufsp2
	0.788597	Rnf213
	0.610722	Stxbp1
	0.704853	Irgm2
	0.802597	Vav1
	0.992546	Glce
	0.611106	Ttll6
	0.725692	Sun2
	0.486202	Akt3
	0.999073	Fosl2
	0.960418	Gpt
	0.556236	Cd6
	0.858032	Tpsg1
	0.966569	Ifit2
	0.950471	Ide
	0.788274	Ifngr1
	0.635087	Oplah
	0.941425	Mgat4a
	0.86222	Kcnq1
	0.802597	Ckmt1
	0.893856	Syt8
	0.521334	Zyx
	0.674204	Trib2
	0.92121	Phf11d
	0.453764	Ddx58
	0.649935	Plin2
	0.788274	Sh2d7
	0.962915	Psmb9
	0.788274	D330045A20Rik
	0.545241	Duoxa2
	0.635658	H6pd
	0.758912	Vav2
	0.802597	Dhrs9
	0.611106	H2-T23
	0.841333	Slc8a1
	0.788597	Ets1
	0.839975	Nebl
	0.461541	Iqgap3
	0.973662	Emp2
	0.648942	Gbp6
	0.649445	Adcy6
	0.480847	Oas1a
	0.733884	Rasgef1b
	0.802597	Plekhh1
	0.787476	Tor3a
	0.52289	Fam129a
	0.86222	Narf
	0.802269	Clps
	0.788597	Pappa2
	0.624083	Cables1
	0.753675	Sowahc
	0.956727	Spink1
	0.46801	2900026A02Rik
	0.913542	Lgals9
	0.955724	Slc5a3
	0.564513	Trafd1
	0.788274	Kcnj16
	0.720811	Abcb1a
	0.788274	Capn13
	0.992803	Mical1
	0.611106	Krt7
	0.788274	Cd8a
	0.917534	Tuba1a
	0.798468	Pbld2
	0.12323	Tmem44
	0.898798	Pglyrp1
	0.992741	Pllp
	0.581466	Ddx17
	0.788274	Golm1
	0.992741	Ppm1j
	0.788274	Rab31
	0.802269	Ptma
	0.327585	Ackr3
	0.799935	Dpp7
	0.45463	Nectin1
	0.788274	Gda
	0.850435	Col8a1
	0.600519	Phlpp2
	0.729895	Pmp22
	0.491079	Rabep1
	0.802597	Grpr
	0.802269	Abhd16a
	0.81724	A230050P20Rik
	0.906274	Xlr4a
	0.798468	Nat8f4
	0.788597	Acss1
	0.802269	Slc2a13
	0.71935	Hist1h1b
	0.961512	Ctse
	0.802269	Hist1h3c
	0.86222	Stat2
	0.972041	Chordc1
	0.74932	Stard3nl
	0.496217	Taf1d
	0.802597	Sh2d6
	0.752915	Tmem236
	0.737705	Pmvk
	0.788597	B4galnt3
	0.435284	Slc7a11
	0.802597	Plec
	0.89559	Ptgr2
	0.602441	Galm
	0.802597	Pcsk1
	0.863904	Fam69a
	0.802227	Synj2
	0.611551	Slc28a2
	0.88644	Psrc1
	0.903084	Cirbp
	0.86459	Bst2
	0.788597	Slc16a3
	0.877312	Fyb
	0.992546	Pi4k2b
	0.799757	Fam120c
	0.997767	Foxo3
	0.802597	Dock7
	0.788274	Abcg5
	0.788597	Slc16a6
	0.992546	Gcg
	0.708241	Tgtp2
	0.472686	AI464131
	0.875056	Isg15
	0.163942	Nrap
	0.3394	Lrrc45
	0.802597	Ces2c
	0.802597	Fgfrl1
	0.377858	Gstm1
	0.906479	Clec14a
	0.701595	Scara5
	0.544029	Smad4
	0.469009	Tstd1
	0.802597	4930539E08Rik
	0.310893	Pam
	0.582943	Spink5
	0.636401	Fat1
	0.532378	Gucd1
	0.964348	Itln1
	0.54974	Matk
	0.624083	Bhlha15
	0.688862	Ccnd2
	0.6491	Fkbp11
	0.520429	Gna14
	0.927684	Lrrc51
	0.797351	Rab15
	0.610355	H2-DMa
	0.434591	Arrdc3
	0.0663403	Tpm2
	0.996575	Amigo3
	0.215028	Eme2
	0.776645	Itih5
	0.992546	Tmem176b
	0.906325	Itih2
	0.874461	mt-Nd1
	0.0901391	Mtmr4
	0.545411	Cipc
	0.601672	Retreg1
	0.189253	Saa3
	0.816066	9130008F23Rik
	0.970172	Sirpa
	0.251232	Cmpk2
	0.0265776	Tfcp2l1
	0.518437	Hoxb7
	0.215853	Itgb4
	0.874277	Zbtb16
	0.963745	Socs1
	0.0541329	Hif3a
	0.608676	Gnai1
	0.000444711	Wtip
	0.86242	Nrep
	0.191904	Pdgfd
	0.482226	Lrrc19
	0.145938	Ffar2
	3.31726e-11	Samd5
	0.725471	Nr3c2
	0.95178	Ktn1
	0.819266	Wfdc18
	0.528795	Myc
	0.88537	Fa2h
	0.155703	Fam78a
	0.783848	Ccdc122
	0.815396	Il4ra
	0.484965	Apob
	0.455184	Gbp7
	0.285118	Kcnk10
	0.802269	Igf2r
	0.248732	Gpr137b
	0.263024	Slc6a19
	0.511435	Samhd1
	0.788274	2310079G19Rik
	0.772141	Rcn1
	0.783848	H2-Q4
	0.026698	Gm1123
	0.345216	Spdef
	0.96654	Cdk6
	0.53573	Tmem37
	0.160579	Hist1h2bn
	0.683625	Hnrnpdl
	0.930031	Parp14
	0.902898	Alox5
	0.788597	Rbp2
	0.802597	Dhx58
	0.555354	Cnnm4
	0.56711	Tmem65
	0.292603	Ak4
	0.922678	Fchsd2
	0.261648	Arl4a
	0.788274	Dock11
	0.802597	Dcp2
	0.842182	B3galt2
	0.788597	Lgals3bp
	0.80338	Cgref1
	0.988724	Mafb
	0.998638	Dync1h1
	0.864013	Cd7
	0.680567	Ric1
	0.456993	Nr4a2
	0.848961	Top2a
	0.4609	Hspa5
	0.942943	Atp12a
	0.724726	Stip1
	0.820863	Mgst3
	0.907685	Plcg2
	0.92121	Slc6a8
	0.777669	2610528A11Rik
	0.203761	Selplg
	0.262293	Itpka
	0.648805	Tmem97
	0.788597	Eif4e3
	0.442679	Man2b1
	0.674204	Gimap4
	0.453764	Zbtb7b
	0.716361	Mthfr
	0.609811	Rhoc
	0.496962	AY358078
	0.155536	Rasd2
	0.8538	Oxsm
	0.788597	Tnip1
	0.720568	Kyat1
	0.559109	Trpm6
	0.605424	Tap2
	0.0129012	Tk1
	0.788597	Lamb1
	0.907116	Rdx
	0.102898	Kcnk5
	0.505969	Anxa8
	0.902898	Rac2
	0.773704	Glb1
	0.916659	Mgat5
	0.802269	Pcsk7
	0.856846	Cyp2d34
	0.802597	Prss30
	0.849327	Tle4
	0.930177	Slc27a2
	0.425156	Npy1r
	0.600229	Pmepa1
	0.345541	Ces1c
	0.365734	Tent5c
	0.718849	Cpn2
	0.774959	Mettl26
	0.727043	Hbegf
	0.442447	Pla2g16
	0.286916	Utp14b
	0.528374	Klf10
	0.962613	Rbms3
	0.536619	Ggh
	0.43701	Slc22a1
	0.540688	Fam102b
	0.870235	Itpr1
	0.754896	Etfrf1
	0.323796	Abcg1
	0.619207	Fut4
	0.89903	Ifi27l2b
	0.648191	Bnip3
	0.24739	mt-Cytb
	0.802269	Chn2
	0.364234	Mylk
	0.439836	Ahnak2
	0.882017	Abcg2
	0.454394	Cyp2d10
	0.640675	Apobec1
	0.262913	Mlph
	0.802597	Map3k6
	0.992808	Tnf
	0.746076	Itm2b
	0.71013	Tgtp1
	0.879056	Hsd17b13
	0.927383	Bmx
	0.0166075	Scnn1b
	0.386263	Cobl
	0.388548	Edn2
	0.254205	Cyp4f13
	0.435042	Azgp1
	0.788597	Spry4
	0.738028	Ddah1
	0.644886	Capg
	0.820209	Nlrx1
	0.859164	Rnase4
	0.831275	Card14
	0.216503	Gm1043
	0.802269	Mgat4c
	0.692666	Stra6l
	0.314125	Sipa1l3
	0.723806	Ly6a
	0.216066	Stx3
	0.162791	Insl5
	0.327374	Pnpo
	0.284836	Kif5c
	0.578766	Med14
	0.638188	Hist1h2be
	0.661846	Gimap3
	0.836878	Nectin2
	0.766843	Zfand3
	0.955385	Nos1ap
	0.254858	Acpp
	0.215573	S100a10
	0.947995	Hnrnpd
	0.674448	Aqp1
	0.343583	Acaa1b
	0.918554	Exoc3l4
	0.036104	Me2
	0.523012	Amotl1
	0.906274	Pik3cg
	0.73336	Chd4
	0.592821	Lap3
	0.918321	Nod2
	0.691363	Jag1
	0.851988	Gzma
	0.283893	Fasl
	0.788597	Cdo1
	0.581417	Apaf1
	0.0431379	2010003K11Rik
	0.725471	Klrd1
	0.921006	2210016F16Rik
	0.9908	Baiap2l1
	0.00513196	Stxbp6
	0.914484	Slfn2
	0.992741	Prex1
	0.713717	Cd47
	0.0244981	Chrm3
	0.494528	Hist2h2bb
	0.848961	Fam83f
	0.992546	Krt23
	0.972782	Tgfbi
	0.884329	Baiap2l2
	0.679043	Nucb2
	0.597246	Pyroxd2
	0.608778	Piezo2
	0.788274	Pik3cd
	0.870225	H2-T22
	0.923489	Alpk1
	0.722459	Tiam2
	0.802597	Slfn5
	0.494031	Rsad2
	0.670286	Scd1
	0.193922	Gprin3
	0.624083	Trim40
	0.63029	Adsl
	0.788597	Misp
	0.700133	Srgap2
	0.993111	Hsd11b2
	0.95995	Pou2f1
	0.386184	Hist1h2bm
	0.613448	Lgals12
	0.929575	Impad1
	0.780169	Phgr1
	0.81171	Tmem176a
	0.662176	Cd53
	0.319322	Prkacb
	0.4423	Slc12a8
	0.382857	Hpgd
	0.487408	Kdelr3
	0.788274	Syne1
	0.611106	Bpgm
	0.369178	Irf2bpl
	0.904306	Sumo3
	0.513045	Spn
	0.713717	Slc15a1
	0.798468	Fam214b
	0.96719	Gm47283
	0.992803	Qser1
	0.520947	Dazap1
	0.71238	Smc1a
	0.973411	Tomm34
	0.461955	Asb2
	0.810844	Igsf3
	0.347522	Lpcat2
	0.612828	Dedd2
	0.788597	Lpo
	0.338378	Pyy
	0.718863	Usp18
	0.859005	Sema4g
	0.845799	Lrig1
	0.0256229	Sema6d
	0.0883083	Cbr1
	0.144739	Cd300lf
	0.651963	Slc7a7
	0.608539	Capn2
	0.272497	Cd69
	0.247093	Sp110
	0.802597	H2-Q10
	0.0303408	Abcc8
	0.00393014	Chchd4
	0.712045	Sprr2a2
	0.402958	Ccdc88b
	0.784232	Hoxa13
	0.420359	Pitpnm1
	0.605424	Nkg7
	0.921006	Atp1b1
	0.121651	Cx3cl1
	0.788597	Prpf39
	0.645657	Omp
	0.895314	Golph3l
	0.590028	Tnrc18
	0.248803	Gm7694
	0.906479	Acy1
	0.884685	Hist1h2bh
	0.825433	Rhobtb3
	0.34863	Fnip2
	0.96819	Gad2
	0.788597	Hist1h2bg
	0.701689	Crip1
	0.771206	Tmem43
	0.992803	Hoxd8
	0.459209	Slc11a2
	0.597069	Fdft1
	0.788597	Trappc6a
	0.828887	Sult1a1
	0.466265	Gbp9
	0.788274	Ugt1a1
	0.69968	Fzd9
	0.788597	Hist1h2ab
	0.885242	Gcnt2
	0.788274	Smpdl3b
	0.992546	Anxa7
	0.992808	Clasp2
	0.915267	Krt20
	0.321663	Krt84
	0.802597	Myo15b
	0.466265	Slco4a1
	0.389028	Wipi1
	0.603842	Klf2
	0.916283	Rad9b
	0.993111	Mt2
	0.684433	Ctsc
	0.788597	Gimap7
	0.788597	Il18
	0.116737	Synpo
	0.802597	Eno1
	0.611106	Gpatch2
	0.992741	Selenbp1
	0.992803	Acap2
	0.475435	Mill2
	0.802597	Tcea3
	0.352657	Hoxb5
	0.721125	Cenpa
	0.787768	Actg1
	0.867809	Ccl9
	0.521198	Eps8l2
	0.497758	Prpsap1
	0.913552	Sult1b1
	0.578698	Vwf
	0.783848	Spint1
	0.71326	Ncoa4
	0.77966	Tead2
	0.663006	Fads3
	0.573742	Nr2e3
	0.649445	Pdia5
	0.935505	Klf9
	0.788597	Atf4
	0.788274	Eps8
	0.581417	Lrrk2
	0.550862	Cdkn1a
	0.783848	Khnyn
	0.65206	Ddx46
	0.52269	Unc13d
	0.788597	Kcnk6
	0.862287	Nckap1l
	0.863063	Ppat
	0.610717	B3galt5
	0.854026	Tppp
	0.648942	Nek3
	0.713717	Sash3
	0.91527	Nin
	0.738672	Odf2
	0.802597	Tmsb10
	0.774593	Nacad
	0.71326	Brpf3
	0.737516	Comtd1
	0.788274	Junb
	0.788274	Rasgrp1
	0.788597	Plekhg6
	0.802269	Trat1
	0.992546	Ang5
	0.802597	Maoa
	0.788274	H2-Q6
	0.802597	Utrn
	0.787476	Zmat3
	0.788597	Bphl
	0.765751	Camk1d
	0.586504	Hdhd2
	0.331584	Hsp90aa1
	0.802597	Hoxb9
	0.84485	E2f2
	0.802597	Casz1
	0.788597	Dnhd1
	0.611106	Bcar3
	0.65473	Tent5a
	0.372975	Fmnl2
	0.30073	Card19
	0.802269	P4hb
	0.544873	Tmem263
	0.802269	Coro1a
	0.815001	Psmb10
	0.730364	Nlrp6
	0.787476	Sgk2
	0.535642	Akap9
	0.906274	Nlrp9b
	0.71326	E2f5
	0.700133	Reps2
	0.909184	Btaf1
	0.788274	Kif23
	0.802597	Trak2
	0.858791	Kat2b
	0.788597	Svil
	0.705779	Arhgap45
	0.932416	Bfar
	0.54823	Rbm20
	0.802269	Dusp1
	0.788597	Plbd1
	0.71326	Cyp2d9
	0.788274	Fam53b
	0.876544	Map2k1
	0.486202	Lrfn3
	0.788597	Nt5dc1
	0.922045	Sppl2a
	0.717416	Scg2
	0.811727	Ppp1r1b
	0.820817	Gramd3
	0.902898	Irs2
	0.788274	Mxi1
	0.610048	Oaf
	0.788597	Gdpd5
	0.603863	Usp28
	0.802269	Ppp1r16b
	0.788597	Gab2
	0.92121	Krt18
	0.535944	Caskin2
	0.355838	Racgap1
	0.92121	Afg3l1
	0.532273	Cryl1
	0.448403	Zfp608
	0.713717	Ezh2
	0.992803	Cftr
	0.992673	Sox5
	0.904302	Rdh1
	0.787476	Hsd17b2
	0.651204	Klhl13
	0.355172	Ccnb2
	0.909284	Ifi47
	0.802597	Itgae
	0.655763	Oas1g
	0.802597	Dennd3
	0.798468	Spink4
	0.985832	Ptprf
	0.899041	Rtp4
	0.794482	Hist1h3f
	0.756185	Tor4a
	0.700202	Fam160a1
	0.992803	Glipr2
	0.832295	Sema5a
	0.788597	Ptpn4
	0.788597	Aldh3b2
	0.895239	Lrp1
	0.788597	Csnk1e
	0.802597	Becn1
	0.985272	Dnm1
	0.535944	Pou2f3
	0.520513	Sesn3
	0.527115	Naip5
	0.620306	Casp12
	0.71326	Nfxl1
	0.788597	Nusap1
	0.590285	Dmbt1
	0.644515	Fry
	0.938569	Cyp2d22
	0.45641	Ccdc17
	0.902898	Grap2
	0.842182	Ehd4
	0.876544	Plcb2
	0.69968	Smpdl3a
	0.817685	Ahnak
	0.788597	Acap1
	0.564126	Ceacam12
	0.788274	Hspb11
	0.788597	Pdp2
	0.842182	Cyp2j6
	0.906479	Itga3
	0.870683	Ldlrad4
	0.704853	Trpc1
	0.00954184	Gale
	0.810034	Pdzd2
	0.802597	Galns
	0.787476	Gsta3
	0.788597	Cdhr5
	0.853613	Evpl
	0.992803	Pfkfb3
	0.802597	Rnf152
	0.687292	Pdlim2
	0.313929	Foxa3
	0.497699	Ezr
	0.802597	Tiparp
	0.772813	Hdgf
	0.624083	Fam83h
	0.428005	Sytl2
	0.709397	Tcf20
	0.788597	Kif15
	0.84485	Tgm3
	0.788274	Plce1
	0.788597	Zbtb7a
	0.641266	Pde8a
	0.780555	Hist1h4d
	0.992741	Parm1
	0.802597	Myo1b
	0.788274	Gm4841
	0.89107	Akr1c12
	0.98502	Zfyve1
	0.802597	mt-Nd2
	0.88269	Rarg
	0.876677	Fbln1
	0.802597	H2-Q2
	0.802597	Sp4
	0.802597	Parp9
	0.992803	Foxp2
	0.992808	Hist1h4i
	0.71326	Shf
	0.788597	Rilpl2
	0.475557	Pfkp
	0.968947	Inf2
	0.822581	Duox2
	0.802269	Fnbp4
	0.798468	Lgr4
	0.806995	Lrp8
	0.360005	Rnf19b
	0.788597	Rab11fip4
	0.992803	Mybbp1a
	0.0717453	Gzmb
	0.704853	Slc35d1
	0.71326	Camk2n1
	0.69968	Cma1
	0.662176	AA986860
	0.574188	Lbh
	0.65469	Sparc
	0.992808	Slc9a9
	0.774478	Pcsk9
	0.701793	Mfsd2a
	0.719526	Mfhas1
	0.965824	Hist1h2af
	0.788274	Cdhr2
	0.802597	Cnot6l
	0.698457	Ttr
	0.917797	Arhgdib
	0.992803	Dusp5
	0.44869	1810046K07Rik
	0.54823	Ptger3
	0.788597	B4galt1
	0.826639	Kctd14
	0.604234	Prdm10
	0.740714	Mllt6
	0.788597	Slc25a34
	0.409291	Dock10
	0.802597	Sprr2a1
	0.788597	Wnt5a
	0.788274	Tubb5
	0.486202	Hs3st1
	0.974537	Arhgef37
	0.793025	Man2b2
	0.802269	Pfkfb4
	0.802269	Ugt8a
	0.779713	C530008M17Rik
	0.507895	Acad11
	0.933441	Unc5b
	0.69968	Eppk1
	0.788597	Slc22a15
	0.662682	Acsf2
	0.94208	Smarcd3
	0.86222	Flna
	0.788597	Zfp217
	0.802597	Slco2a1
	0.173213	Anxa1
	0.413194	Zfat
	0.977358	Xdh
	0.842182	Sytl4
	0.788597	Kcnh3
	0.933894	Rhbdf1
	0.802597	Ncf2
	0.788274	Hist1h4k
	0.0911373	Fhl1
	0.535642	Clca3a1
	0.896039	Prdx6
	0.80665	Pcnt
	0.802597	Rpl12
	0.321125	AI854703
	0.887063	Nfat5
	0.69968	Gjb2
	0.71326	Hist1h1a
	0.713717	Herc1
	0.965155	Bcorl1
	0.370344	Cdkl1
	0.51974	Cd96
	0.611106	Ikbke
	0.992803	Adgrg5
	0.992803	P4ha1
	0.802597	Klhl9
	0.788597	Hivep3
	0.953409	Hist2h2ac
	0.899971	Vegfa
	0.731976	Tut4
	0.802597	Gal3st2c
	0.842491	Dnah5
	0.713717	Serp1
	0.414574	St6gal1
	0.802597	Hipk2
	0.935175	C330018D20Rik
	0.899789	B3gntl1
	0.701689	Emb
	0.788597	Tgm2
	0.86137	Ikzf1
	0.788597	Kif1bp
	0.50193	Pde11a
	0.870683	Slc4a4
	0.940218	Crip2
	0.870683	Ankdd1b
	0.707058	Lima1
	0.541629	Cacna1b
	0.648942	Afap1l2
	0.293556	Prom1
	0.649445	Pbx2
	0.802597	Dok7
	0.802269	Pdlim1
	0.757267	Limd2
	0.802597	Pcyox1l
	0.802597	Hmcn1
	0.992808	Reg3b
	0.788597	Casp3
	0.466916	Egln1
	0.802227	Qrsl1
	0.788274	Hist1h2bf
	0.184753	Lck
	0.802269	Mep1b
	0.824574	Acad12
	0.802597	Stard8
	0.553804	Ubtd1
	0.566505	Srr
	0.729176	Zfp503
	0.834288	Vars
	0.802269	Bag1
	0.664091	Ash2l
	0.689039	Rras2
	0.788597	Ddc
	0.788274	Snf8
	0.190045	Bcas1
	0.549426	Arhgap35
	0.372281	Ccdc28b
	0.815569	Slc20a1
	0.0217269	Ly6e
	0.693199	Slc25a25
	0.258508	Slc12a2
	0.751564	Rab3d
	0.802597	S100pbp
	0.214606	Fam187b
	0.786261	Zbtb7c
	0.240712	Ttc3
	0.961204	Rab27a
	0.858032	Dhrs11
	0.802597	Dtx1
	0.209482	Tns4
	0.788274	Gnat3
	0.685759	Gvin1
	0.798291	Gsta4
	0.49389	Plekhm1
	0.802269	Sv2c
	0.657291	Cxcr6
	0.44116	Tceal9
	0.802597	Thy1
	0.714968	Tanc1
	0.802269	Cd3d
	0.788597	Itk
	0.760877	Hist1h4h
	0.39348	Mdp1
	0.771577	C77080
	0.8445	Acsl3
	0.691764	Orai2
	0.949463	Shank2
	0.873276	Trim65
	0.735776	Best2
	0.802597	Lars2
	0.593117	Pheta1
	0.993111	Auts2
	0.678452	Ppa1
	0.323289	Errfi1
	0.403307	Rab27b
	0.906274	Zfp1
	0.497252	Hbp1
	0.787476	Chmp1b
	0.155526	Shcbp1
	0.992808	Slc9a3r1
	0.992741	Lamc2
	0.906274	Hist1h3e
	0.958029	Katnbl1
	0.213872	Agl
	0.514736	Spib
	0.488657	Sec23a
	0.47699	Glul
	0.77945	Pcdhga10
	0.802269	Rdh11
	0.697236	Il21r
	0.918864	Abr
	0.774182	Tlr2
	0.809259	Itgb7
	0.855252	Nexmif
	0.438171	Hspa1b
	0.387275	Ech1
	0.601905	Zmiz1
	0.753554	Cfap36
	0.981639	Zcchc2
	0.553705	Cd83
	0.451318	Nr6a1
	0.788597	Gimap6
	0.432931	Sec31b
	0.333574	Ank3
	0.263487	Mpzl1
	0.457201	Slc2a6
	0.597046	Id1
	0.607864	Ttc37
	0.962192	Car8
	0.906479	Hist1h4f
	0.544108	Uimc1
	0.701841	Stk32a
	0.992803	Isoc2b
	0.977353	Tfrc
	0.743602	Mark2
	0.95072	Cisd1
	0.95278	Hmgn1
	0.992275	Skap1
	0.241025	Itga6
	0.921006	Fgf1
	0.586187	Acadl
	0.802269	Ace2
	0.558715	Cpne8
	0.872089	Fabp6
	0.375773	Hook1
	0.807279	C1qtnf6
	0.818917	Fastkd1
	0.865479	Tppp3
	0.874411	Mvp
	0.788274	Enpep
	0.703694	Nup210l
	0.992803	Lrrc8c
	0.017842	Cpn1
	0.802269	Exosc10
	0.802269	Hnrnpll
	0.796	Ipmk
	0.391545	Clcn4
	0.384364	Pgam1
	0.8652	Irak1
	0.870294	Eif2s3y
	0.9908	Akr1b7
	0.802269	Arhgef11
	0.802269	Robo2
	0.0374321	Mmp14
	0.762615	Abcg8
	0.789151	Egr1
	0.788274	Trak1
	0.899845	Cdca3
	0.4137	Sec11c
	0.513672	Ccdc9b
	0.802597	Ikzf3
	0.712344	Susd6
	0.941378	Nampt
	0.788274	Ceacam1
	0.872654	Mat2a
	0.788597	Txndc12
	0.411707	Il2rb
	0.992741	Hoxb13
	0.221326	Sorbs2
	0.958705	Rgs11
	0.981429	Agps
	0.723143	Satb2
	0.906274	Agr2
	0.499303	Ltn1
	0.840064	Atp1a1
	0.820218	Apbb1ip
	0.649109	Il17rd
	0.992803	Gabre
	0.00584143	Dennd1b
	0.788597	Tlr1
	0.736593	Cd247
	0.899732	Cdh1
	0.783848	Mmaa
	0.897618	Impa1
	0.607653	Ctsl
	0.820981	Sidt1
	0.909827	Srgap3
	0.913961	Rhbdf2
	0.604374	Guca2a
	0.849067	Phf11c
	0.927373	Mex3d
	0.626424	Hmgcs1
	0.929523	Lmna
	0.754163	Acox1
	0.467086	Ahsa1
	5.27164e-09	Rgl2
	0.085539	2410002F23Rik
	0.660345	Fyco1
	0.838252	Anapc5
	0.0109682	Aurkb
	0.803567	Chchd10
	0.00295233	Add3
	0.815508	Zfp652
	0.720811	Psme1
	0.629918	Ctsw
	0.596428	Gbp4
	0.576592	Cox6a1
	0.0853157	Chat
	0.992546	Ubtf
	0.935418	Ces2a
	0.905502	Plekho2
	0.875693	Prodh
	0.107076	Dclk3
	0.630185	Rhou
	0.620546	Slc16a5
	0.664682	Tmem139
	0.421367	Dbp
	0.993111	Ddx3x
	0.691747	1700019D03Rik
	0.802269	Xylt1
	0.180139	Ppcdc
	0.906982	Hist1h2bj
	0.555354	Tpcn1
	0.783001	Ptpn13
	0.828765	Tspan14
	0.788597	Ripk2
	0.98929	Bicdl1
	0.546774	Sin3b
	0.978078	Man2c1
	0.480932	Map2
	0.726409	9130230L23Rik
	0.69968	Paqr4
	0.641174	P2ry10
	0.624083	Slc16a12
	0.802597	Xkr4
	0.774251	Ppp6r2
	0.588428	Kcnf1
	0.846985	Edf1
	0.815396	Zscan26
	0.788274	Edn3
	0.788597	Gtf2h3
	0.788274	Por
	0.443013	Prr14l
	0.379719	Hdac7
	0.779932	Plxnb1
	0.785227	Ints6
	0.603108	Hist1h2bk
	0.670522	Ctnna1
	0.411626	Cdc25b
	0.938189	Cand2
	0.219109	Melk
	0.861767	Ssbp2
	0.549091	Spsb1
	0.624083	Chic1
	0.694101	Slc37a1
	0.788597	Bbx
	0.92408	Pik3ap1
	0.566505	Nde1
	0.700133	Il6ra
	0.917534	Rrnad1
	0.684449	Zfp9
	0.338468	Smg7
	0.632028	Hnrnpf
	0.776277	Dctn1
	0.548979	Gal3st2
	0.698228	Cyb5rl
	0.40789	Marcks
	0.69968	Snx10
	0.808532	Klhdc10
	0.787476	Nfil3
	0.919537	Ifitm2
	0.992808	Mid2
	0.713717	Tnfrsf12a
	0.585901	Lyzl4
	0.57047	Htr4
	0.500042	Ms4a4b
	0.662131	Igf2bp2
	0.71326	Fam83c
	0.802597	Wdfy2
	0.339388	Afap1
	0.258711	Il16
	0.841495	Tbc1d24
	0.725065	Fbxo10
	0.98888	Slc16a1
	0.802597	Tmc6
	0.735506	Cnp
	0.321663	Cbr2
	0.903084	Acat1
	0.798174	Zfpm1
	0.618596	Ube2l6
	0.247653	Jup
	0.762469	Tmem80
	0.277009	Cep63
	0.788597	Avil
	0.892249	Hmgn2
	0.872711	Mdc1
	0.79917	Ece1
	0.839221	Usp20
	0.428714	Pde7a
	0.484199	Tmem253
	0.583344	P2ry2
	0.162936	Ccr5
	0.6902	Npc2
	0.899399	Tlr3
	0.907356	Dynll1
	0.396656	Ces2e
	0.842213	Bbc3
	0.384364	Cd52
	0.787476	Itga4
	0.802227	Mlh3
	0.802597	4930402H24Rik
	0.802597	Elf3
	0.52289	Tmsb4x
	0.819508	Cebpd
	0.719687	Myef2
	0.802316	Syngr1
	0.344594	Thumpd3
	0.588199	Lurap1
	0.812841	Vnn1
	0.71326	Rab22a
	0.838811	Herc6
	0.925959	Ada
	0.140824	Galnt3
	0.149383	Gpcpd1
	0.967439	Tmed10
	0.683315	Eef2k
	0.86222	Lekr1
	0.950064	Hist4h4
	0.307752	Yif1b
	0.94051	Zfp629
	0.370578	E030030I06Rik
	0.344583	Dock9
	0.816885	Bahcc1
	0.871835	Thop1
	0.0222482	Zap70
	0.788597	Hist1h2ad
	0.97485	Cyp4f16
	0.802269	Dpep1
	0.992741	Hspa4l
	0.842182	Trim12a
	0.00662446	Tph1
	0.483919	Zmym4
	0.802597	Car2
	0.592432	Calr
	0.802597	Gm5485
	0.902898	Mtch1
	0.439169	Nags
	0.796168	Gjb5
	0.831139	Cry1
	0.653076	Sec14l2
	0.71992	Rgs13
	0.558715	Hapln1
	0.84485	Higd2a
	0.788597	Phf21a
	0.992803	1700066B19Rik
	0.908631	Ttc9c
	0.788274	Lrrc26
	0.9678	Ccnl2
	0.802269	Rb1cc1
	0.422057	Tmem82
	0.558715	Ddx10
	0.992741	Prdx4
	0.205252	Wwc1
	0.788597	Yeats4
	0.802597	Dock2
	0.418498	H2afx
	0.942539	Dennd5a
	0.992741	Timp2
	0.929143	Rin3
	0.992803	Dhx30
	0.788274	Dtnb
	0.992546	Zfp951
	0.521103	St3gal6
	0.975156	Lnx1
	0.882531	Matr3
	0.485307	Rasal3
	0.598399	Ppp4r4
	0.367812	Tapbpl
	0.424254	Galnt11
	0.797694	Tmem267
	0.788597	Arhgef1
	0.234883	Dgke
	0.655817	Laptm5
	0.563866	Cmtm4
	0.992546	Cnn2
	0.32713	L1cam
	0.788597	Mcl1
	0.561866	Mpzl2
	0.451916	Ttc39c
	0.284525	Ift172
	0.0355248	Ccdc129
	0.801747	Endod1
	0.983381	Tac1
	0.734258	Trim46
	0.885407	Asap3
	0.802227	Maf
	0.742209	Gimap8
	0.436479	Apol10a
	0.893264	Vipr1
	0.385718	Erbb2
	0.788597	Ddx60
	0.788274	Gart
	0.672956	Fopnl
	0.49969	Tshz1
	0.802597	Pdpr
	0.912917	Tjp1
	0.0182395	Cables2
	0.802597	Xpnpep2
	0.993889	Armcx5
	0.903084	Lcp2
	0.860253	Spata6
	0.802597	Nuak2
	0.793925	Noa1
	0.860563	Cacybp
	0.802227	Phf20
	0.778595	Wdr25
	0.373294	Rhoh
	0.805044	Lat
	0.709779	Togaram1
	0.320793	Aurka
	0.788597	Apol7e
	0.802269	Nsun3
	0.788274	Capsl
	0.602466	Atp7b
	0.858032	Chst11
	0.499427	Fam173b
	0.906479	Cyp27a1
	0.419213	Ugt1a5
	0.512818	Rps6kb1
	0.578587	Adgra3
	0.906479	Bcl9
	0.343758	Cd3g
	0.658409	Zc3h6
	0.788597	B4galnt1
	0.788597	Gxylt1
	0.357493	Serpinb5
	0.802597	Grb7
	0.788597	Kdm1a
	0.427213	Spred1
	0.751263	Oasl1
	0.788274	Bmpr2
	0.766165	Zmynd8
	0.802269	Lpgat1
	0.154765	Msra
	0.802597	Car12
	0.590423	Zfp358
	0.964671	Srsf7
	0.0967453	Plxnb2
	0.950748	Mt3
	0.713717	Pet100
	0.788597	Dnmt3b
	0.802597	Gm4951
	0.552413	Hspa4
	0.345941	Otud7b
	0.433678	Pdia6
	0.738073	Mvb12b
	0.366415	ccdc198
	0.802597	Entpd5
	0.81724	Gse1
	0.307497	Kctd12
	0.441089	Max
	0.82532	Cdk1
	0.915331	Dbf4
	0.802597	Fgf12
	0.856	Slc17a2
	0.611106	Gpr89
	0.201191	Acly
	0.540158	Icmt
	0.474797	Plcb4
	0.771239	Tmco3
	0.788274	Slc7a6
	0.802597	Hr
	0.802597	Tmem173
	0.766703	Tst
	0.802269	Ccdc93
	0.935821	C2cd4b
	0.463782	Ccdc32
	0.850704	Cbx2
	0.939967	Xaf1
	0.700133	Clu
	0.550862	Abhd8
	0.439836	Eva1a
	0.86222	Bcl11b
	0.90897	Elovl7
	0.788274	Ipcef1
	0.621729	Pgk1
	0.628534	Slc5a9
	0.973662	Trim59
	0.427735	Tax1bp1
	0.99301	Avpi1
	0.358529	Rbl1
	0.802269	9930111J21Rik1
	0.664562	Ptprs
	0.526968	Mboat1
	0.864586	Pold1
	0.317231	Trim34a
	0.964568	Ndrg2
	0.335939	Plcxd2
	0.802597	Osr2
	0.672124	Rfxank
	0.0646443	Megf9
	0.99258	Tsga10
	0.402348	Ppp1r26
	0.214049	Ampd3
	0.788597	Zfp667
	0.353722	Slc35a3
	0.587289	Lcmt2
	0.78034	Lipa
	0.668891	Dym
	0.954903	Slc38a9
	0.802269	Cln5
	0.715546	Kmt5b
	0.62	D1Ertd622e
	0.700733	Fggy
	0.796662	Cd48
	0.656392	Map3k13
	0.635877	Tacc2
	0.561579	Kif21a
	0.910455	Sephs2
	0.87454	Hook2
	0.000376611	Cyp4f40
	0.228606	Ttc39b
	0.295188	Lmo7
	0.264626	Tnfrsf11a
	0.407936	Sik1
	0.662924	Bax
	0.783848	Lamb3
	0.800848	Ccna2
	0.341853	Tmem229b
	0.798468	Mib1
	0.749324	Arhgef40
	0.912086	Mpp6
	0.802227	Olfr78
	0.385025	Cav2
	0.9908	Vti1a
	0.312926	Pag1
	0.902898	Nupr1
	0.00529632	Tsc22d2
	0.415282	St8sia4
	0.726407	Nav2
	0.829415	Lpin3
	0.586855	Lrrc31
	0.699209	Myl7
	0.942858	Rps20
	0.915963	Atxn1
	0.649888	Poc1a
	0.14963	Fyttd1
	0.214277	Ccdc71l
	0.16797	Rbm14
	0.333941	Ceacam18
	0.276419	Sez6l2
	0.0337515	Tspan6
	0.992808	Nt5c
	0.505789	Rab37
	0.54823	Plekhn1
	0.627807	Zfp677
	0.776333	Myh14
	0.712798	Apol7a
	0.5083	Stim1
	0.97888	9930111J21Rik2
	0.892635	Acaca
	0.0206419	Mcrip2
	0.0214469	Abcc2
	0.17138	Ptpn22
	0.774182	Oasl2
	0.00848799	Cd226
	0.0981375	Umad1
	0.327922	Snrnp70
	0.186203	Cdca4
	0.701055	Klc4
	0.0993158	Ergic1
	0.862891	Ldlrad3
	0.505222	Ksr1
	0.531897	Hinfp
	0.597856	Fstl1
	0.902869	Cyth4
	0.00660545	Tmem238l
	0.931258	mt-Co1
	0.289663	Siah2
	0.38629	Glud1
	0.909158	Mki67
	0.581245	Ccdc34
	0.8773	Plxna1
	0.659817	Cdc25a
	0.699069	Ndrg1
	0.970036	Wrn
	0.139832	Clip2
	0.932216	H60c
	0.965094	Sel1l
	0.99298	Hnrnpul2
	0.797506	Ptpru
	0.831167	Tgoln1
	0.338224	Gcdh
	0.294754	Xpnpep3
	0.000941711	Nr1i2
	0.213495	Cfap97
	0.0891844	Cdca7
	0.788274	Pdrg1
	0.545136	Cpt2
	0.909239	Ovol2
	0.908849	Tagln2
	0.620369	2010300C02Rik
	0.479457	Clmp
	0.000492877	Mpp5
	0.788274	Kctd3
	0.700113	Slc22a21
	0.740027	Arhgap32
	0.709397	Mad2l1
	0.84485	Mertk
	0.992741	Lrp4
	0.787476	Stk35
	0.783848	Phf11b
	0.511453	Ptk7
	0.802597	Gorasp1
	0.802597	Naxd
	0.788597	Rrp9
	0.802597	Adh1
	0.788274	Nts
	0.992803	Foxd2
	0.660498	Ankrd12
	0.793783	Stil
	0.552311	Adam19
	0.992741	Heatr3
	0.802597	Tmem45b
	0.788274	Liph
	0.798468	Naip6
	0.992275	Tbc1d1
	0.71326	Zfp790
	0.788597	Hist1h2bl
	0.992741	Smad7
	0.882502	Cox6c
	0.691747	Cd14
	0.935488	Otc
	0.896512	Dglucy
	0.866397	Barx2
	0.69968	Fxyd4
	0.845246	Mex3a
	0.859651	2210407C18Rik
	0.737623	Osbpl1a
	0.802597	Ly6g
	0.992803	Wdr43
	0.906551	Arc
	0.798468	Slc51a
	0.611106	Atp6v0a4
	0.788597	Eef1akmt3
	0.64233	Spice1
	0.466265	Rpl3
	0.788274	Ppp5c
	0.700133	Slc6a20a
	0.788597	Slc12a6
	0.846504	Ddost
	0.802597	Appl1
	0.616383	Srxn1
	0.788274	Phgdh
	0.355689	2810004N23Rik
	0.559429	P2rx4
	0.76037	Gsap
	0.857169	Dcaf5
	0.701689	Sgpl1
	0.895239	Ppard
	0.510995	Mpdu1
	0.770983	K230010J24Rik
	0.945879	Msn
	0.802597	Armc6
	0.713206	Cyp39a1
	0.598729	Zfp292
	0.806722	1810010D01Rik
	0.574477	Cd244a
	0.604543	Pclaf
	0.802597	Kdm5a
	0.69968	Foxp1
	0.740644	Vangl2
	0.906479	Sphk2
	0.802269	Zc3h4
	0.777769	Proz
	0.992546	Slc25a45
	0.392651	Ick
	0.713717	Cenpf
	0.788597	St18
	0.71326	Dixdc1
	0.935856	Dclre1a
	0.917709	Pim1
	0.700133	Suds3
	0.708032	Rhoq
	0.88832	Pamr1
	0.834288	Nlrc3
	0.42236	Rnf187
	0.802597	Apol6
	0.960417	Smim6
	0.619126	Nmnat1
	0.380958	Adcy5
	0.700133	Gm21885
	0.624083	Eno3
	0.328188	Gbp5
	0.788274	Pla2g12a
	0.844523	Pbk
	0.644485	Atp11a
	0.906479	Pign
	0.398204	Fam184b
	0.788274	Cgn
	0.550862	Abcc4
	0.11998	Tmem56
	0.988417	Rps4x
	0.693405	Tfpi2
	0.695547	Urgcp
	0.738672	Rabl6
	0.611106	Adam22
	0.572269	Tox
	0.802269	Heatr1
	0.788274	Gdf15
	0.944081	Tmbim4
	0.896734	Esyt1
	0.588576	Rgs14
	0.735632	Cap2
	0.798468	St3gal4
	0.802597	Hsd3b3
	0.788597	Hist1h3i
	0.885242	Ltb
	0.992741	Pabpc4
	0.876544	Igsf9
	0.835335	Itgb6
	0.802597	Hist1h2ai
	0.926061	Nktr
	0.662176	1700021F05Rik
	0.745067	Spc24
	0.982555	AI661453
	0.460435	Cd200r1
	0.815034	Nbea
	0.798468	Ciapin1
	0.802269	Col3a1
	0.535642	Asap1
	0.788274	Fosb
	0.992741	Ak1
	0.802269	Adcy7
	0.787476	Phldb2
	0.817288	Anp32a
	0.942447	Ifih1
	0.992741	Acot9
	0.788597	4932438A13Rik
	0.899843	Hist1h2ak
	0.802269	Dtx3l
	0.906274	Rptor
	0.787476	Aplp1
	0.992803	Hmgcl
	0.632544	Zranb2
	0.788274	Snx30
	0.954653	Ccnl1
	0.992803	Hic1
	0.802269	Thyn1
	0.802269	Trim16
	0.788597	Srgn
	0.802597	Dlg3
	0.899041	Itgam
	0.802597	Avl9
	0.885343	Ndc80
	0.802269	Klf3
	0.788274	Pstpip2
	0.802269	Camk2b
	0.567882	Mkl2
	0.662698	Sap30
	0.944931	Tef
	0.880158	Mycbp2
	0.802269	Sfxn5
	0.523127	Rinl
	0.611106	Pros1
	0.454934	Tedc1
	0.877781	Defb45
	0.660817	Wnk2
	0.830841	Cnn3
	0.684433	Gpx2
	0.84056	H2-K1
	0.926497	Eps8l3
	0.92121	Gnpnat1
	0.760859	Ehf
	0.788274	Hip1r
	0.14353	Gm12185
	0.992741	Timeless
	0.78113	Birc5
	0.906479	Ubxn7
	0.992546	Plekha6
	0.788274	Fth1
	0.943303	Arl15
	0.788274	Usmg5
	0.798468	H1fx
	0.355151	Hnrnpa3
	0.993111	Nhlrc2
	0.773528	Mrps22
	0.901357	Mbd6
	0.802227	Il22ra1
	0.802597	Pfkl
	0.955559	Naglu
	0.343251	Sh3bp5l
	0.902898	Zbtb20
	0.788597	Gpr171
	0.915144	Gpat3
	0.988724	Amdhd2
	0.992803	Ptgfrn
	0.993149	Zfp931
	0.802597	Maob
	0.780232	E130308A19Rik
	0.711352	Hic2
	0.788597	Gsto2
	0.788274	Mroh3
	0.817299	Rassf10
	0.802597	Mtmr12
	0.993535	Tmem64
	0.660685	Rph3al
	0.802597	Pde1b
	0.992546	Snrnp200
	0.975039	Tlnrd1
	0.605424	Mcm3
	0.780446	Edn1
	0.788274	Soga1
	0.712775	Cbr4
	0.439548	Slc6a6
	0.514007	Dnah9
	0.902898	Ano1
	0.371076	Hist1h3h
	0.802597	Arhgef17
	0.802597	Incenp
	0.640296	Spop
	0.307762	Ajuba
	0.992741	Ces1g
	0.788274	Stat5b
	0.788597	Invs
	0.561193	Lrmda
	0.802269	Cpe
	0.912553	Fbxo25
	0.691747	Cyp2d26
	0.96428	Ccne1
	0.788274	Abhd10
	0.802597	Helz2
	0.809688	Catspere2
	0.992741	Ppp1r3b
	0.788597	Dnaja2
	0.796	Anxa3
	0.811009	Fes
	0.827767	Kif13b
	0.681983	Bcl2l2
	0.512541	Klhdc1
	0.964833	Smim13
	0.788597	Relch
	0.612854	Mbd1
	0.917709	Opa3
	0.508847	Cul7
	0.992546	Wdr47
	0.834439	Insl6
	0.025316	BC025446
	0.953954	Fundc1
	0.149431	Ninl
	0.199041	Arhgef3
	0.797105	Tmem170b
	0.069745	Cdk2ap1
	0.0803624	1810065E05Rik
	0.218959	Rprm
	0.387583	Reg3g
	0.094154	Jade1
	0.782465	Ncald
	0.960478	Dnttip1
	0.918224	Hes6
	0.53557	Ugt1a7c
	0.0583822	Flot2
	0.0393142	Btnl1
	0.23564	Adprm
	0.113447	Mgmt
	0.21549	Uchl5
	0.851809	Mdn1
	0.858552	Acox3
	0.351648	Cdr2
[truncated: 26,586 more rows]

## Sheet: Volcano plot
	pvalue	log2FoldChange	Minus log 10 pValue			pvalue	log2FoldChange	Minus log 10 pValue				log2FoldChange	Minus log 10 pValue					Minus log 10 pValue
[truncated: 28,349 more rows]
