# Supplementary material for: DDX5 promotes oncogene C3 and FABP1 expressions and drives intestinal inflammation and tumorigenesis
Source: Life Sci Alliance. 2020 Aug 18;3(10):e202000772. doi: 10.26508/lsa.202000772 (PMC7441524; doi:10.26508/lsa.202000772)
Supplement: Supplementary file 7 [file LSA-2020-00772_TableS3.xlsx]

## Sheet: GO_Ileum
GO Pathway analysis: DDX5-dependent ileal IEC transcripts
Analysis Type:	PANTHER Overrepresentation Test (Released 20181113)
Annotation Version and Release Date:	GO Ontology database Released 2018-10-08
Analyzed List:	upload_1 (Mus musculus)
Reference List:	IleumBkg.txt (Mus musculus)	There are duplicate IDs in the file. The unique set of IDs will be used.
Test Type:	FISHER
Correction:	FDR
GO biological process complete	IleumBkg.txt - REFLIST (11432)	upload_1 (311)	upload_1 (expected)	upload_1 (over/under)	upload_1 (fold Enrichment)	upload_1 (raw P-value)	upload_1 (FDR)	LOG10-FC
response to stimulus (GO:0050896)	3997	147	108.74	+	1.35	1.35e-05	0.0127
immune system process (GO:0002376)	1094	59	29.76	+	1.98	5.8e-07	0.000909	6.23657
lipid metabolic process (GO:0006629)	727	42	19.78	+	2.12	6.8e-06	0.00738	5.16749
response to bacterium (GO:0009617)	340	33	9.25	+	3.57	1.07e-09	1.51e-05	8.97062
organelle organization (GO:0006996)	2301	32	62.6	-	0.51	5.06e-06	0.00595	5.29585
cellular response to DNA damage stimulus (GO:0006974)	557	1	15.15	-	0.07	8.51e-06	0.00858	5.07007
response to external stimulus (GO:0009605)	984	54	26.77	+	2.02	1.28e-06	0.00164	5.89279
response to biotic stimulus (GO:0009607)	508	41	13.82	+	2.97	1.56e-09	1.1e-05	8.80688
immune response (GO:0006955)	545	41	14.83	+	2.77	1.04e-08	2.94e-05	7.98297
defense response (GO:0006952)	590	41	16.05	+	2.55	1.1e-07	0.000222	6.95861
response to other organism (GO:0051707)	487	40	13.25	+	3.02	1.58e-09	7.41e-06	8.80134
response to external biotic stimulus (GO:0043207)	488	40	13.28	+	3.01	1.67e-09	5.87e-06	8.77728
cellular lipid metabolic process (GO:0044255)	577	38	15.7	+	2.42	9.53e-07	0.00134	6.02091
innate immune response (GO:0045087)	314	29	8.54	+	3.39	3.22e-08	7.56e-05	7.49214
immune effector process (GO:0002252)	267	21	7.26	+	2.89	2.67e-05	0.0179
defense response to bacterium (GO:0042742)	112	13	3.05	+	4.27	2.62e-05	0.0185
defense response to virus (GO:0051607)	118	13	3.21	+	4.05	4.32e-05	0.0277
defense response to Gram-positive bacterium (GO:0050830)	61	10	1.66	+	6.03	1.62e-05	0.012
defense response to Gram-negative bacterium (GO:0050829)	45	8	1.22	+	6.53	6.94e-05	0.0408
antigen processing and presentation of peptide or polysaccharide antigen via MHC class II (GO:0002504)	8	5	0.22	+	22.97	1.36e-05	0.012
antigen processing and presentation of peptide antigen via MHC class II (GO:0002495)	8	5	0.22	+	22.97	1.36e-05	0.0113
antigen processing and presentation of exogenous peptide antigen via MHC class II (GO:0019886)	8	5	0.22	+	22.97	1.36e-05	0.0107
DNA metabolic process (GO:0006259)	554	2	15.07	-	0.13	6.2e-05	0.038
defense response to other organism (GO:0098542)	241	24	6.56	+	3.66	1.46e-07	0.000257	6.83565

## Sheet: GO_Colon
GO Pathway analysis: DDX5-dependent colonic IEC transcripts
Analysis Type:	PANTHER Overrepresentation Test (Released 20181113)
Annotation Version and Release Date:	GO Ontology database Released 2018-10-08
Analyzed List:	upload_1 (Mus musculus)
Reference List:	ColonBkg.txt (Mus musculus)	There are duplicate IDs in the file. The unique set of IDs will be used.
Test Type:	FISHER
Correction:	FDR
GO biological process complete	ColonBkg.txt - REFLIST (11849)	upload_1 (487)	upload_1 (expected)	upload_1 (over/under)	upload_1 (fold Enrichment)	upload_1 (raw P-value)	upload_1 (FDR)	LOG10-FC
peptidyl-lysine modification (GO:0018205)	201	0	8.26	-	< 0.01	0.000667	0.0422	6.23657
regulation of humoral immune response mediated by circulating immunoglobulin (GO:0002923)	5	4	0.21	+	19.46	0.000258	0.0216
antigen processing and presentation (GO:0019882)	54	17	2.22	+	7.66	1.5e-09	7.92e-07	8.82391
response to interferon-gamma (GO:0034341)	82	21	3.37	+	6.23	4.38e-10	2.84e-07	9.35853
unsaturated fatty acid metabolic process (GO:0033559)	46	10	1.89	+	5.29	5.82e-05	0.00686	4.23508
defense response to bacterium (GO:0042742)	102	19	4.19	+	4.53	2.49e-07	6.58e-05	6.6038
positive regulation of antigen processing and presentation (GO:0002579)	6	4	0.25	+	16.22	0.000417	0.0303
positive regulation of cell-cell adhesion (GO:0022409)	151	24	6.21	+	3.87	9.59e-08	3.11e-05	7.01818
cellular nitrogen compound metabolic process (GO:0034641)	2421	50	99.5	-	0.5	5.77e-09	2.84e-06	8.23882
nucleic acid metabolic process (GO:0090304)	1531	20	62.92	-	0.32	1.23e-10	9.77e-08	9.91009
antigen processing and presentation of peptide or polysaccharide antigen via MHC class II (GO:0002504)	9	7	0.37	+	18.92	1.2e-06	0.000268	5.92082
antigen processing and presentation of peptide antigen via MHC class II (GO:0002495)	9	7	0.37	+	18.92	1.2e-06	0.000264	5.92082
antigen processing and presentation of exogenous peptide antigen via MHC class II (GO:0019886)	9	7	0.37	+	18.92	1.2e-06	0.00026	5.92082
positive regulation of humoral immune response (GO:0002922)	7	5	0.29	+	17.38	5.91e-05	0.00685	4.22841
antigen processing and presentation of exogenous peptide antigen (GO:0002478)	16	10	0.66	+	15.21	2.52e-08	9.72e-06	7.5986
defense response to protozoan (GO:0042832)	16	9	0.66	+	13.69	2.51e-07	6.51e-05	6.60033
response to protozoan (GO:0001562)	19	10	0.78	+	12.81	8.54e-08	2.83e-05	7.06854
antigen processing and presentation of endogenous peptide antigen via MHC class Ib (GO:0002476)	15	6	0.62	+	9.73	0.00012	0.0121
negative regulation of leukocyte mediated cytotoxicity (GO:0001911)	13	5	0.53	+	9.36	0.000525	0.0356
adhesion of symbiont to host (GO:0044406)	12	6	0.49	+	12.17	4.54e-05	0.00573	4.34294
antigen processing and presentation of exogenous antigen (GO:0019884)	21	10	0.86	+	11.59	1.76e-07	4.92e-05	6.75449
positive regulation of acute inflammatory response (GO:0002675)	14	5	0.58	+	8.69	0.00069	0.0431
sensory perception of taste (GO:0050909)	14	5	0.58	+	8.69	0.00069	0.0429
negative regulation of cell killing (GO:0031342)	14	5	0.58	+	8.69	0.00069	0.0427
antigen processing and presentation of peptide antigen (GO:0048002)	32	15	1.32	+	11.4	1.67e-10	1.25e-07	9.77728
antigen processing and presentation of peptide antigen via MHC class I (GO:0002474)	13	6	0.53	+	11.23	6.42e-05	0.00738	4.19246
antigen processing and presentation of peptide antigen via MHC class Ib (GO:0002428)	16	7	0.66	+	10.64	2.02e-05	0.00283	4.69465
arachidonic acid metabolic process (GO:0019369)	23	7	0.95	+	7.4	0.000132	0.0129
regulation of humoral immune response (GO:0002920)	16	7	0.66	+	10.64	2.02e-05	0.0028	4.69465
antigen processing and presentation of endogenous peptide antigen (GO:0002483)	19	8	0.78	+	10.24	6.37e-06	0.00106	5.19586
cellular extravasation (GO:0045123)	21	6	0.86	+	6.95	0.000535	0.0362
antigen processing and presentation of endogenous antigen (GO:0019883)	21	8	0.86	+	9.27	1.15e-05	0.00172	4.9393
antigen processing and presentation via MHC class Ib (GO:0002475)	19	7	0.78	+	8.96	4.9e-05	0.00607	4.3098
positive regulation of T cell mediated cytotoxicity (GO:0001916)	26	9	1.07	+	8.42	6.1e-06	0.00102	5.21467
positive regulation of cell killing (GO:0031343)	49	15	2.01	+	7.45	1.91e-08	7.77e-06	7.71897
negative regulation of lymphocyte mediated immunity (GO:0002707)	26	7	1.07	+	6.55	0.00025	0.0211
regulation of T cell mediated cytotoxicity (GO:0001914)	30	9	1.23	+	7.3	1.59e-05	0.00231	4.7986
regulation of natural killer cell mediated cytotoxicity (GO:0042269)	27	7	1.11	+	6.31	0.000304	0.0245
leukocyte cell-cell adhesion (GO:0007159)	31	8	1.27	+	6.28	0.000116	0.0118
positive regulation of leukocyte mediated cytotoxicity (GO:0001912)	42	12	1.73	+	6.95	9.46e-07	0.000218	6.02411
positive regulation of T cell mediated immunity (GO:0002711)	39	11	1.6	+	6.86	3e-06	0.000577	5.52288
regulation of acute inflammatory response (GO:0002673)	28	7	1.15	+	6.08	0.000368	0.0282
neutrophil chemotaxis (GO:0030593)	28	7	1.15	+	6.08	0.000368	0.028
regulation of natural killer cell mediated immunity (GO:0002715)	28	7	1.15	+	6.08	0.000368	0.0279
response to interferon-beta (GO:0035456)	40	11	1.64	+	6.69	3.69e-06	0.000674	5.43297
regulation of cell killing (GO:0031341)	62	17	2.55	+	6.67	8.63e-09	3.97e-06	8.06399
cellular response to interferon-beta (GO:0035458)	33	9	1.36	+	6.64	3.01e-05	0.00405	4.52143
neutrophil migration (GO:1990266)	35	8	1.44	+	5.56	0.000239	0.0205
regulation of leukocyte mediated cytotoxicity (GO:0001910)	54	14	2.22	+	6.31	3.22e-07	7.91e-05	6.49214
'de novo' posttranslational protein folding (GO:0051084)	31	7	1.27	+	5.49	0.000623	0.0406
negative regulation of leukocyte mediated immunity (GO:0002704)	31	7	1.27	+	5.49	0.000623	0.0404
negative regulation of innate immune response (GO:0045824)	36	9	1.48	+	6.08	5.39e-05	0.00651	4.26841
regulation of T cell mediated immunity (GO:0002709)	54	13	2.22	+	5.86	1.74e-06	0.000359	5.75945
'de novo' protein folding (GO:0006458)	32	7	1.32	+	5.32	0.000734	0.0453
positive regulation of lymphocyte mediated immunity (GO:0002708)	71	17	2.92	+	5.83	4.77e-08	1.7e-05	7.32148
negative regulation of viral genome replication (GO:0045071)	38	9	1.56	+	5.76	7.72e-05	0.00847	4.11238
granulocyte migration (GO:0097530)	42	9	1.73	+	5.21	0.00015	0.0141
positive regulation of response to cytokine stimulus (GO:0060760)	38	8	1.56	+	5.12	0.000387	0.0287
positive regulation of leukocyte mediated immunity (GO:0002705)	93	21	3.82	+	5.49	3.09e-09	1.57e-06	8.51004
positive regulation of chemokine production (GO:0032722)	39	8	1.6	+	4.99	0.00045	0.0321
positive regulation of adaptive immune response based on somatic recombination of immune receptors built from immunoglobulin superfamily domains (GO:0002824)	71	16	2.92	+	5.48	2.42e-07	6.51e-05	6.61618
positive regulation of phagocytosis (GO:0050766)	40	8	1.64	+	4.87	0.000522	0.0356
defense response to Gram-positive bacterium (GO:0050830)	49	11	2.01	+	5.46	1.92e-05	0.00272	4.7167
positive regulation of alpha-beta T cell activation (GO:0046635)	46	9	1.89	+	4.76	0.000272	0.0223
positive regulation of adaptive immune response (GO:0002821)	78	17	3.21	+	5.3	1.54e-07	4.49e-05	6.81248
regulation of lymphocyte mediated immunity (GO:0002706)	100	21	4.11	+	5.11	9.41e-09	4.07e-06	8.02641
pattern recognition receptor signaling pathway (GO:0002221)	47	9	1.93	+	4.66	0.000313	0.0248
cellular response to interferon-gamma (GO:0071346)	69	14	2.84	+	4.94	4.01e-06	0.000698	5.39686
icosanoid metabolic process (GO:0006690)	53	10	2.18	+	4.59	0.000163	0.015
innate immune response-activating signal transduction (GO:0002758)	48	9	1.97	+	4.56	0.000359	0.0278
regulation of leukocyte mediated immunity (GO:0002703)	136	27	5.59	+	4.83	2.12e-10	1.51e-07	9.67366
regulation of adaptive immune response based on somatic recombination of immune receptors built from immunoglobulin superfamily domains (GO:0002822)	103	20	4.23	+	4.72	6.62e-08	2.3e-05	7.17914
negative regulation of immune response (GO:0050777)	88	17	3.62	+	4.7	6.85e-07	0.000163	6.16431
xenobiotic metabolic process (GO:0006805)	56	10	2.3	+	4.34	0.000242	0.0207
positive regulation of T cell proliferation (GO:0042102)	56	10	2.3	+	4.34	0.000242	0.0206
negative regulation of immune effector process (GO:0002698)	79	15	3.25	+	4.62	3.73e-06	0.000674	5.42829
regulation of adaptive immune response (GO:0002819)	115	21	4.73	+	4.44	7.83e-08	2.66e-05	7.10624
positive regulation of leukocyte cell-cell adhesion (GO:1903039)	127	23	5.22	+	4.41	2.15e-08	8.51e-06	7.66756
positive regulation of T cell differentiation (GO:0045582)	63	11	2.59	+	4.25	0.000143	0.0136
positive regulation of T cell activation (GO:0050870)	119	21	4.89	+	4.29	1.3e-07	3.96e-05	6.88606
regulation of viral genome replication (GO:0045069)	68	12	2.79	+	4.29	6.54e-05	0.00746	4.18442
negative regulation of leukocyte differentiation (GO:1902106)	66	11	2.71	+	4.06	0.000205	0.018
positive regulation of tumor necrosis factor production (GO:0032760)	60	10	2.47	+	4.06	0.000396	0.0291
positive regulation of tumor necrosis factor superfamily cytokine production (GO:1903557)	61	10	2.51	+	3.99	0.000445	0.032
regulation of alpha-beta T cell activation (GO:0046634)	69	11	2.84	+	3.88	0.000289	0.0235
lymphocyte mediated immunity (GO:0002449)	74	13	3.04	+	4.27	3.41e-05	0.00446	4.46725
calcium-mediated signaling (GO:0019722)	63	10	2.59	+	3.86	0.000558	0.0375
positive regulation of production of molecular mediator of immune response (GO:0002702)	63	10	2.59	+	3.86	0.000558	0.0373
positive regulation of immune effector process (GO:0002699)	151	26	6.21	+	4.19	6.49e-09	3.09e-06	8.18776
cellular response to xenobiotic stimulus (GO:0071466)	83	13	3.41	+	3.81	9.72e-05	0.0101
response to bacterium (GO:0009617)	340	57	13.97	+	4.08	1.05e-17	3e-14	16.9788
innate immune response (GO:0045087)	311	49	12.78	+	3.83	2.06e-14	2.94e-11	13.6861
adaptive immune response based on somatic recombination of immune receptors built from immunoglobulin superfamily domains (GO:0002460)	86	13	3.53	+	3.68	0.000134	0.013
defense response to other organism (GO:0098542)	232	36	9.54	+	3.78	1.02e-10	8.53e-08	9.9914
response to external biotic stimulus (GO:0043207)	486	74	19.97	+	3.7	1.19e-20	8.45e-17	19.9245
adaptive immune response (GO:0002250)	146	22	6	+	3.67	7.39e-07	0.000173	6.13136
positive regulation of lymphocyte differentiation (GO:0045621)	74	11	3.04	+	3.62	0.000493	0.0343
response to other organism (GO:0051707)	485	73	19.93	+	3.66	4.03e-20	1.44e-16	19.3947
response to xenobiotic stimulus (GO:0009410)	120	18	4.93	+	3.65	7.95e-06	0.00126	5.09963
cell chemotaxis (GO:0060326)	95	14	3.9	+	3.59	9.51e-05	0.01
response to biotic stimulus (GO:0009607)	506	75	20.8	+	3.61	2.56e-20	1.22e-16	19.5918
regulation of immune effector process (GO:0002697)	244	36	10.03	+	3.59	3.54e-10	2.4e-07	9.451
leukocyte migration (GO:0050900)	95	14	3.9	+	3.59	9.51e-05	0.00997	4.02182
positive regulation of innate immune response (GO:0045089)	129	19	5.3	+	3.58	5.66e-06	0.000961	5.24718
positive regulation of lymphocyte proliferation (GO:0050671)	84	12	3.45	+	3.48	0.000383	0.0287
immune response (GO:0006955)	554	81	22.77	+	3.56	1.33e-21	1.9e-17	20.8761
leukocyte mediated immunity (GO:0002443)	99	14	4.07	+	3.44	0.000141	0.0135
positive regulation of mononuclear cell proliferation (GO:0032946)	86	12	3.53	+	3.39	0.000464	0.0327
regulation of production of molecular mediator of immune response (GO:0002700)	86	12	3.53	+	3.39	0.000464	0.0326
cellular response to molecule of bacterial origin (GO:0071219)	111	15	4.56	+	3.29	0.00013	0.0128
cellular response to lipopolysaccharide (GO:0071222)	104	14	4.27	+	3.28	0.000224	0.0196
regulation of T cell proliferation (GO:0042129)	104	14	4.27	+	3.28	0.000224	0.0195
positive regulation of leukocyte proliferation (GO:0070665)	89	12	3.66	+	3.28	0.000612	0.0402
negative regulation of defense response (GO:0031348)	132	19	5.43	+	3.5	7.62e-06	0.00122	5.11805
regulation of innate immune response (GO:0045088)	190	27	7.81	+	3.46	1.19e-07	3.68e-05	6.92445
immune response-activating signal transduction (GO:0002757)	122	16	5.01	+	3.19	0.000107	0.011
negative regulation of peptide secretion (GO:0002792)	92	12	3.78	+	3.17	0.000797	0.0488
positive regulation of lymphocyte activation (GO:0051251)	174	23	7.15	+	3.22	3.14e-06	0.000589	5.50307
regulation of leukocyte cell-cell adhesion (GO:1903037)	182	24	7.48	+	3.21	1.99e-06	0.000406	5.70115
response to virus (GO:0009615)	154	20	6.33	+	3.16	1.73e-05	0.00247	4.76195
second-messenger-mediated signaling (GO:0019932)	131	17	5.38	+	3.16	7.4e-05	0.00818	4.13077
defense response to virus (GO:0051607)	119	15	4.89	+	3.07	0.000258	0.0215
positive regulation of immune response (GO:0050778)	319	41	13.11	+	3.13	8.79e-10	5.22e-07	9.05601
immune response-regulating signaling pathway (GO:0002764)	128	16	5.26	+	3.04	0.000177	0.016
positive regulation of defense response (GO:0031349)	187	24	7.69	+	3.12	3.05e-06	0.00058	5.5157
response to molecule of bacterial origin (GO:0002237)	167	21	6.86	+	3.06	1.67e-05	0.0024	4.77728
positive regulation of cell activation (GO:0050867)	209	26	8.59	+	3.03	2e-06	0.000402	5.69897
defense response (GO:0006952)	607	75	24.95	+	3.01	2.64e-16	5.37e-13	15.5784
positive regulation of leukocyte activation (GO:0002696)	202	25	8.3	+	3.01	3.42e-06	0.000634	5.46597
response to lipopolysaccharide (GO:0032496)	155	19	6.37	+	2.98	5.72e-05	0.0068	4.2426
regulation of T cell activation (GO:0050863)	191	23	7.85	+	2.93	1.26e-05	0.00185	4.89963
negative regulation of multi-organism process (GO:0043901)	126	15	5.18	+	2.9	0.000449	0.0322
regulation of defense response (GO:0031347)	375	45	15.41	+	2.92	9.31e-10	5.31e-07	9.03105
positive regulation of hemopoiesis (GO:1903708)	135	16	5.55	+	2.88	0.000307	0.0246
activation of immune response (GO:0002253)	155	18	6.37	+	2.83	0.000166	0.0151
regulation of lymphocyte proliferation (GO:0050670)	138	16	5.67	+	2.82	0.000383	0.0286
cellular response to biotic stimulus (GO:0071216)	130	15	5.34	+	2.81	0.000605	0.0399
positive regulation of cell adhesion (GO:0045785)	268	32	11.01	+	2.91	3.02e-07	7.56e-05	6.51999
regulation of immune response (GO:0050776)	448	53	18.41	+	2.88	4.29e-11	3.82e-08	10.3675
negative regulation of secretion by cell (GO:1903531)	131	15	5.38	+	2.79	0.00065	0.042
regulation of mononuclear cell proliferation (GO:0032944)	140	16	5.75	+	2.78	0.000443	0.0321
positive regulation of immune system process (GO:0002684)	522	60	21.45	+	2.8	5.84e-12	5.95e-09	11.2336
regulation of cell-cell adhesion (GO:0022407)	252	29	10.36	+	2.8	2.15e-06	0.000426	5.66756
regulation of inflammatory response (GO:0050727)	194	22	7.97	+	2.76	4.46e-05	0.00568	4.35067
regulation of leukocyte proliferation (GO:0070663)	144	16	5.92	+	2.7	0.000587	0.0389
immune effector process (GO:0002252)	276	31	11.34	+	2.73	1.52e-06	0.00032	5.81816
positive regulation of response to external stimulus (GO:0032103)	164	18	6.74	+	2.67	0.000312	0.0248
negative regulation of secretion (GO:0051048)	146	16	6	+	2.67	0.000673	0.0422
regulation of leukocyte differentiation (GO:1902105)	188	21	7.73	+	2.72	8.06e-05	0.0087	4.09366
negative regulation of immune system process (GO:0002683)	289	32	11.88	+	2.69	1.37e-06	0.000291	5.86328
cellular response to cytokine stimulus (GO:0071345)	405	42	16.65	+	2.52	1.65e-07	4.69e-05	6.78252
response to external stimulus (GO:0009605)	1002	103	41.18	+	2.5	4.55e-17	1.08e-13	16.342
biological adhesion (GO:0022610)	418	43	17.18	+	2.5	1.39e-07	4.14e-05	6.85699
cell-cell adhesion (GO:0098609)	209	21	8.59	+	2.44	0.000395	0.0292
G protein-coupled receptor signaling pathway (GO:0007186)	243	25	9.99	+	2.5	7.8e-05	0.00849	4.10791
inflammatory response (GO:0006954)	221	22	9.08	+	2.42	0.000302	0.0245
regulation of lymphocyte activation (GO:0051249)	266	27	10.93	+	2.47	4.43e-05	0.00569	4.3536
response to cytokine (GO:0034097)	473	47	19.44	+	2.42	9.95e-08	3.15e-05	7.00218
inorganic ion transmembrane transport (GO:0098660)	223	22	9.17	+	2.4	0.000329	0.0259
regulation of immune system process (GO:0002682)	798	79	32.8	+	2.41	3.45e-12	3.79e-09	11.4622
chemotaxis (GO:0006935)	226	22	9.29	+	2.37	0.000376	0.0284
regulation of hemopoiesis (GO:1903706)	258	25	10.6	+	2.36	0.000153	0.0143
regulation of cell activation (GO:0050865)	345	34	14.18	+	2.4	9.9e-06	0.00152	5.00436
regulation of multi-organism process (GO:0043900)	276	27	11.34	+	2.38	7.19e-05	0.00807	4.14327
taxis (GO:0042330)	228	22	9.37	+	2.35	0.000412	0.0302
anion transport (GO:0006820)	281	27	11.55	+	2.34	0.000138	0.0133
regulation of leukocyte activation (GO:0002694)	321	31	13.19	+	2.35	3.38e-05	0.00446	4.47108
ion transmembrane transport (GO:0034220)	300	29	12.33	+	2.35	6.64e-05	0.00751	4.17783
immune system process (GO:0002376)	1122	107	46.11	+	2.32	1.15e-15	2.05e-12	14.9393
metal ion transport (GO:0030001)	282	26	11.59	+	2.24	0.000269	0.0223
positive regulation of cytokine production (GO:0001819)	261	24	10.73	+	2.24	0.000512	0.0351
cell adhesion (GO:0007155)	410	38	16.85	+	2.26	9.32e-06	0.00145	5.03058
cell activation (GO:0001775)	359	32	14.76	+	2.17	9.41e-05	0.01
regulation of cell adhesion (GO:0030155)	444	41	18.25	+	2.25	3.91e-06	0.000696	5.40782
regulation of response to external stimulus (GO:0032101)	442	40	18.17	+	2.2	1.12e-05	0.0017	4.95078
cation transport (GO:0006812)	390	34	16.03	+	2.12	0.000101	0.0105
multi-organism process (GO:0051704)	1102	98	45.29	+	2.16	1.38e-12	1.64e-09	11.8601
regulation of hormone levels (GO:0010817)	318	27	13.07	+	2.07	0.00065	0.0418
regulation of peptide secretion (GO:0002791)	318	27	13.07	+	2.07	0.00065	0.0416
regulation of cytokine production (GO:0001817)	411	36	16.89	+	2.13	5.3e-05	0.00647	4.27572
ion transport (GO:0006811)	643	55	26.43	+	2.08	9.88e-07	0.000224	6.00524
response to lipid (GO:0033993)	394	32	16.19	+	1.98	0.000512	0.0353
inorganic ion homeostasis (GO:0098771)	381	31	15.66	+	1.98	0.000667	0.0421
transmembrane transport (GO:0055085)	513	43	21.08	+	2.04	2.7e-05	0.00367	4.56864
localization of cell (GO:0051674)	547	43	22.48	+	1.91	0.00012	0.012
cell motility (GO:0048870)	547	43	22.48	+	1.91	0.00012	0.0119
regulation of secretion by cell (GO:1903530)	490	38	20.14	+	1.89	0.000338	0.0264
response to drug (GO:0042493)	463	36	19.03	+	1.89	0.000558	0.0372
cell migration (GO:0016477)	499	41	20.51	+	2	5.88e-05	0.00687	4.23062
regulation of secretion (GO:0051046)	520	39	21.37	+	1.82	0.000506	0.035
cellular response to chemical stimulus (GO:0070887)	1453	114	59.72	+	1.91	3.45e-11	3.28e-08	10.4622
locomotion (GO:0040011)	637	47	26.18	+	1.8	0.000235	0.0203
cellular response to oxygen-containing compound (GO:1901701)	554	41	22.77	+	1.8	0.000488	0.0341
response to organic substance (GO:0010033)	1498	112	61.57	+	1.82	9.52e-10	5.22e-07	9.02136
cellular response to organic substance (GO:0071310)	1130	84	46.44	+	1.81	2.31e-07	6.33e-05	6.63639
regulation of response to stress (GO:0080134)	884	59	36.33	+	1.62	0.000454	0.0322
positive regulation of response to stimulus (GO:0048584)	1285	81	52.81	+	1.53	0.000159	0.0147
response to chemical (GO:0042221)	2059	151	84.63	+	1.78	8.74e-13	1.13e-09	12.0585
regulation of transport (GO:0051049)	1179	79	48.46	+	1.63	3.23e-05	0.0043	4.4908
regulation of localization (GO:0032879)	1779	105	73.12	+	1.44	0.000181	0.0162
response to stimulus (GO:0050896)	4142	258	170.24	+	1.52	1.92e-15	3.04e-12	14.7167
regulation of response to stimulus (GO:0048583)	2377	134	97.7	+	1.37	0.000114	0.0116
cellular response to stimulus (GO:0051716)	3304	175	135.8	+	1.29	0.00017	0.0154
biological regulation (GO:0065007)	6813	322	280.02	+	1.15	0.000146	0.0138
metabolic process (GO:0008152)	5432	183	223.26	-	0.82	0.000343	0.0267
response to stress (GO:0006950)	1957	116	80.43	+	1.44	5.44e-05	0.00651	4.2644
regulation of biological quality (GO:0065008)	2438	139	100.2	+	1.39	4.05e-05	0.00525	4.39254
organic substance metabolic process (GO:0071704)	5090	164	209.2	-	0.78	4.57e-05	0.00572	4.34008
primary metabolic process (GO:0044238)	4857	153	199.63	-	0.77	2.17e-05	0.00297	4.66354
cellular protein metabolic process (GO:0044267)	2289	62	94.08	-	0.66	0.000199	0.0176
cellular metabolic process (GO:0044237)	4920	153	202.21	-	0.76	7.61e-06	0.00123	5.11862
nitrogen compound metabolic process (GO:0006807)	4501	130	184.99	-	0.7	2.92e-07	7.43e-05	6.53462
organelle organization (GO:0006996)	2364	63	97.16	-	0.65	7.4e-05	0.00824	4.13077
macromolecule metabolic process (GO:0043170)	3918	102	161.03	-	0.63	8.71e-09	3.88e-06	8.05998
cellular macromolecule metabolic process (GO:0044260)	3162	77	129.96	-	0.59	2.85e-08	1.07e-05	7.54516
macromolecule biosynthetic process (GO:0009059)	1036	22	42.58	-	0.52	0.00066	0.042
organic cyclic compound metabolic process (GO:1901360)	2187	52	89.89	-	0.58	4.66e-06	0.0008	5.33161
cellular nitrogen compound biosynthetic process (GO:0044271)	970	20	39.87	-	0.5	0.000619	0.0405
cellular aromatic compound metabolic process (GO:0006725)	2064	47	84.83	-	0.55	2.71e-06	0.00053	5.56703
heterocycle metabolic process (GO:0046483)	2037	40	83.72	-	0.48	2.95e-08	1.08e-05	7.53018
nucleobase-containing compound metabolic process (GO:0006139)	1946	36	79.98	-	0.45	1.07e-08	4.5e-06	7.97062
cellular macromolecule biosynthetic process (GO:0034645)	1012	18	41.59	-	0.43	5.2e-05	0.00639	4.284
chromatin organization (GO:0006325)	510	7	20.96	-	0.33	0.000737	0.0453
RNA metabolic process (GO:0016070)	1061	15	43.61	-	0.34	6.55e-07	0.000158	6.18376
gene expression (GO:0010467)	1363	17	56.02	-	0.3	6.57e-10	4.07e-07	9.18243
chromosome organization (GO:0051276)	750	9	30.83	-	0.29	7.21e-06	0.00118	5.14206
RNA processing (GO:0006396)	658	7	27.04	-	0.26	8.17e-06	0.00128	5.08778
DNA metabolic process (GO:0006259)	559	5	22.98	-	0.22	1.19e-05	0.00177	4.92445
ribonucleoprotein complex biogenesis (GO:0022613)	370	3	15.21	-	0.2	0.000361	0.0279
ribosome biogenesis (GO:0042254)	249	1	10.23	-	0.1	0.000812	0.0495
histone modification (GO:0016570)	282	1	11.59	-	0.09	0.00027	0.0222
ncRNA processing (GO:0034470)	311	1	12.78	-	0.08	8.57e-05	0.00919	4.06702
covalent chromatin modification (GO:0016569)	289	1	11.88	-	0.08	0.00018	0.0162
ncRNA metabolic process (GO:0034660)	389	1	15.99	-	0.06	3.91e-06	0.000688	5.40782
