# Supplementary material for: DDX5 promotes oncogene C3 and FABP1 expressions and drives intestinal inflammation and tumorigenesis
Source: Life Sci Alliance. 2020 Aug 18;3(10):e202000772. doi: 10.26508/lsa.202000772 (PMC7441524; doi:10.26508/lsa.202000772)
Supplement: Supplementary file 8 [file LSA-2020-00772_SdataF2.1.xlsx]

## Sheet: Fig_2B
	Present	Absent
WT	13	4
KO	2	10
