# Supplementary material for: DDX5 promotes oncogene C3 and FABP1 expressions and drives intestinal inflammation and tumorigenesis
Source: Life Sci Alliance. 2020 Aug 18;3(10):e202000772. doi: 10.26508/lsa.202000772 (PMC7441524; doi:10.26508/lsa.202000772)
Supplement: Supplementary file 12 [file LSA-2020-00772_SdataF2.5.xlsx]

## Sheet: Fig 2G
WT(n=7)	Het (n=6)	EpKO (n=9)
6.7	7	7
7	6.8	6.6
5.7	6.8	7.3
	7
7.5	7	9
7	6.8	7.3
6		5.5*
6.5		8.9
7*		8.2
		8.5
