# Supplementary material for: DDX5 promotes oncogene C3 and FABP1 expressions and drives intestinal inflammation and tumorigenesis
Source: Life Sci Alliance. 2020 Aug 18;3(10):e202000772. doi: 10.26508/lsa.202000772 (PMC7441524; doi:10.26508/lsa.202000772)
Supplement: Supplementary file 13 [file LSA-2020-00772_TableS4.xlsx]

## Sheet: Sheet1
Name	Catalog number	Company	Assay
DDX5	ab53216	Abcam	eCLIP
DDX5	ab10261	Abcam	Western
DDX5	9877S	Cell Signaling	IHC
FABP1	13368T	Cell Signaling	Western
β-Tubulin	2128S	Cell Signaling	Western
Fibrillarin	2639S	Cell Signaling	Western
Normal Rabbit IgG	12-370	MILLIPORE	ChIP
RNA Polymerase II	GTX102535	GeneTex	ChIP
H3K4me3	ab8580	Abcam	ChIP
RPL10A	ab226381	Abcam	Ribosome IP
