# Supplementary material for: DDX5 promotes oncogene C3 and FABP1 expressions and drives intestinal inflammation and tumorigenesis
Source: Life Sci Alliance. 2020 Aug 18;3(10):e202000772. doi: 10.26508/lsa.202000772 (PMC7441524; doi:10.26508/lsa.202000772)
Supplement: Supplementary file 16 [file LSA-2020-00772_SdataF3.2.xlsx]

## Sheet: Fig_3F_Left
Psicheck2_empty	Psicheck2_empty	Psicheck2_empty	Psicheck2_empty	C3eCLIP	C3eCLIP	C3eCLIP	C3eCLIP	C3eCLIP+siCTL	C3eCLIP+siCTL	C3eCLIP+siCTL	C3eCLIP+siCTL	C3eCLIP+siDDX5	C3eCLIP+siDDX5	C3eCLIP+siDDX5	C3eCLIP+siDDX5
6.83779	4.70409	3.30959		19.653	13.9531	12.1392		13.7874	14.8792	15.2163		11.9279	12.0389	13.516
