# Supplementary material for: DDX5 promotes oncogene C3 and FABP1 expressions and drives intestinal inflammation and tumorigenesis
Source: Life Sci Alliance. 2020 Aug 18;3(10):e202000772. doi: 10.26508/lsa.202000772 (PMC7441524; doi:10.26508/lsa.202000772)
Supplement: Supplementary file 19 [file LSA-2020-00772_SdataF4.1.xlsx]

## Sheet: Fig_4C
Day	Apc fl/+ Ddx5 +/+ or fl/+ Villin1Cre +	Apc fl/+ Ddx5 +/+ or fl/+ Villin1Cre +	Apc fl/+ Ddx5 +/+ or fl/+ Villin1Cre +	Apc fl/+ Ddx5 +/+ or fl/+ Villin1Cre +	Apc fl/+ Ddx5 +/+ or fl/+ Villin1Cre +	Apc fl/+ Ddx5 +/+ or fl/+ Villin1Cre +	Apc fl/+ Ddx5 +/+ or fl/+ Villin1Cre +	Apc fl/+ Ddx5 +/+ or fl/+ Villin1Cre +	Apc fl/+ Ddx5 +/+ or fl/+ Villin1Cre +	Apc fl/+ Ddx5 +/+ or fl/+ Villin1Cre +	Apc fl/+ Ddx5 +/+ or fl/+ Villin1Cre +	Apc fl/+ Ddx5 +/+ or fl/+ Villin1Cre +	Apc fl/+ Ddx5 +/+ or fl/+ Villin1Cre +	Apc fl/+ Ddx5 +/+ or fl/+ Villin1Cre +	Apc fl/+ Ddx5 +/+ or fl/+ Villin1Cre +	Apc fl/+ Ddx5 +/+ or fl/+ Villin1Cre +	Apc fl/+ Ddx5 fl/fl Villin1Cre +	Apc fl/+ Ddx5 fl/fl Villin1Cre +	Apc fl/+ Ddx5 fl/fl Villin1Cre +	Apc fl/+ Ddx5 fl/fl Villin1Cre +	Apc fl/+ Ddx5 fl/fl Villin1Cre +	Apc fl/+ Ddx5 fl/fl Villin1Cre +	Apc fl/+ Ddx5 fl/fl Villin1Cre +	Apc fl/+ Ddx5 fl/fl Villin1Cre +	Apc fl/+ Ddx5 fl/fl Villin1Cre +	Apc fl/+ Ddx5 fl/fl Villin1Cre +	Apc fl/+ Ddx5 fl/fl Villin1Cre +	Apc fl/+ Ddx5 fl/fl Villin1Cre +	Apc fl/+ Ddx5 fl/fl Villin1Cre +	Apc fl/+ Ddx5 fl/fl Villin1Cre +	Apc fl/+ Ddx5 fl/fl Villin1Cre +	Apc fl/+ Ddx5 fl/fl Villin1Cre +
100	95	92	101	102	99	97	99	100	98	101							102	110	100	103	102	100	102	101	102	100	100	104	102
110	98	82	103	96			98	100	89	103							107	119	102	106	104	102	104	105	104	101	100	106	105
120	87	78	83	94			81	98	85	106							107	127	94	108	107	102	109	107	112	101	101	111	107
