# Supplementary material for: DDX5 promotes oncogene C3 and FABP1 expressions and drives intestinal inflammation and tumorigenesis
Source: Life Sci Alliance. 2020 Aug 18;3(10):e202000772. doi: 10.26508/lsa.202000772 (PMC7441524; doi:10.26508/lsa.202000772)
Supplement: Supplementary file 20 [file LSA-2020-00772_SdataF4.2.xlsx]

## Sheet: Fig_4D
	Apc fl/+ Ddx5 +/+ or fl/+ Villin1Cre +	Apc fl/+ Ddx5 +/+ or fl/+ Villin1Cre +	Apc fl/+ Ddx5 +/+ or fl/+ Villin1Cre +	Apc fl/+ Ddx5 +/+ or fl/+ Villin1Cre +	Apc fl/+ Ddx5 +/+ or fl/+ Villin1Cre +	Apc fl/+ Ddx5 +/+ or fl/+ Villin1Cre +	Apc fl/+ Ddx5 +/+ or fl/+ Villin1Cre +	Apc fl/+ Ddx5 +/+ or fl/+ Villin1Cre +	Apc fl/+ Ddx5 +/+ or fl/+ Villin1Cre +	Apc fl/+ Ddx5 +/+ or fl/+ Villin1Cre +	Apc fl/+ Ddx5 +/+ or fl/+ Villin1Cre +	Apc fl/+ Ddx5 +/+ or fl/+ Villin1Cre +	Apc fl/+ Ddx5 +/+ or fl/+ Villin1Cre +	Apc fl/+ Ddx5 fl/fl Villin1Cre +	Apc fl/+ Ddx5 fl/fl Villin1Cre +	Apc fl/+ Ddx5 fl/fl Villin1Cre +	Apc fl/+ Ddx5 fl/fl Villin1Cre +	Apc fl/+ Ddx5 fl/fl Villin1Cre +	Apc fl/+ Ddx5 fl/fl Villin1Cre +	Apc fl/+ Ddx5 fl/fl Villin1Cre +	Apc fl/+ Ddx5 fl/fl Villin1Cre +	Apc fl/+ Ddx5 fl/fl Villin1Cre +	Apc fl/+ Ddx5 fl/fl Villin1Cre +	Apc fl/+ Ddx5 fl/fl Villin1Cre +	Apc fl/+ Ddx5 fl/fl Villin1Cre +	Apc fl/+ Ddx5 fl/fl Villin1Cre +
Colon	3	3	4	6	1*	3	5	2	8	6	10			5	3	2	1	0	2	4	4	2	4	4	3	2
