# Supplementary material for: DDX5 promotes oncogene C3 and FABP1 expressions and drives intestinal inflammation and tumorigenesis
Source: Life Sci Alliance. 2020 Aug 18;3(10):e202000772. doi: 10.26508/lsa.202000772 (PMC7441524; doi:10.26508/lsa.202000772)
Supplement: Supplementary file 21 [file LSA-2020-00772_SdataF4.3.xlsx]

## Sheet: Fig_4E_left
	SI	SI	SI	SI	SI	SI	SI	SI
WT	67	63	96	33	18	30	46	43
KO	4	20	4	2	1	4	3	9
