# Supplementary material for: DDX5 promotes oncogene C3 and FABP1 expressions and drives intestinal inflammation and tumorigenesis
Source: Life Sci Alliance. 2020 Aug 18;3(10):e202000772. doi: 10.26508/lsa.202000772 (PMC7441524; doi:10.26508/lsa.202000772)
Supplement: Supplementary file 22 [file LSA-2020-00772_SdataF4.4.xlsx]

## Sheet: Fig_4E_right
	Apc fl/+ Ddx5 +/+ or fl/+ Villin1Cre +	Apc fl/+ Ddx5 +/+ or fl/+ Villin1Cre +	Apc fl/+ Ddx5 +/+ or fl/+ Villin1Cre +	Apc fl/+ Ddx5 +/+ or fl/+ Villin1Cre +	Apc fl/+ Ddx5 +/+ or fl/+ Villin1Cre +	Apc fl/+ Ddx5 +/+ or fl/+ Villin1Cre +	Apc fl/+ Ddx5 +/+ or fl/+ Villin1Cre +	Apc fl/+ Ddx5 +/+ or fl/+ Villin1Cre +	Apc fl/+ Ddx5 +/+ or fl/+ Villin1Cre +	Apc fl/+ Ddx5 +/+ or fl/+ Villin1Cre +	Apc fl/+ Ddx5 +/+ or fl/+ Villin1Cre +	Apc fl/+ Ddx5 +/+ or fl/+ Villin1Cre +	Apc fl/+ Ddx5 +/+ or fl/+ Villin1Cre +	Apc fl/+ Ddx5 fl/fl Villin1Cre +	Apc fl/+ Ddx5 fl/fl Villin1Cre +	Apc fl/+ Ddx5 fl/fl Villin1Cre +	Apc fl/+ Ddx5 fl/fl Villin1Cre +	Apc fl/+ Ddx5 fl/fl Villin1Cre +	Apc fl/+ Ddx5 fl/fl Villin1Cre +	Apc fl/+ Ddx5 fl/fl Villin1Cre +	Apc fl/+ Ddx5 fl/fl Villin1Cre +	Apc fl/+ Ddx5 fl/fl Villin1Cre +	Apc fl/+ Ddx5 fl/fl Villin1Cre +	Apc fl/+ Ddx5 fl/fl Villin1Cre +	Apc fl/+ Ddx5 fl/fl Villin1Cre +	Apc fl/+ Ddx5 fl/fl Villin1Cre +
Duodenum	1	4	11	16	9	0	10	1	4	3	3			0	3	1	5	0	0	0	0	1	1	0	0	1
Jejunum	11	53	20	20	12	37	59	12	22	13	16			3	14	0	20	0	0	0	0	3	1	5	3	0
Ileum	8	10	6	27	17	7	27	17	7	2	11			1	3	3	1	2	0	1	0	1	1	6	1	0
