# Supplementary material for: DDX5 promotes oncogene C3 and FABP1 expressions and drives intestinal inflammation and tumorigenesis
Source: Life Sci Alliance. 2020 Aug 18;3(10):e202000772. doi: 10.26508/lsa.202000772 (PMC7441524; doi:10.26508/lsa.202000772)
Supplement: Supplementary file 28 [file LSA-2020-00772_SdataF5.2.xlsx]

## Sheet: Fig 5F
Cyto			Nuc
WT	Vil1Cre_DDX5KO		WT	Vil1Cre_DDX5KO
4.57353	3.46663		0.38659	0.36008
3.62	2.65201		0.322771	0.190653
